# Supplementary material for: Comparative Transcript Profiling of Resistant and Susceptible Tea Plants in Response to Gray Blight Disease
Source: MDPI journal article supplement (doi:10.3390/agronomy14030565), 2024-03-11
Supplement: s1 [file s1]

Archive with 2 entries (2 files):
- Supporting information Tables.xlsx
- Supporting information-Figures.pdf
