# Supplementary material for: Comparative Transcript Profiling of Resistant and Susceptible Tea Plants in Response to Gray Blight Disease
Source: MDPI journal article supplement (doi:10.3390/agronomy14030565), 2024-03-11
Supplement: s1 [file s1 › Supporting information Tables.xlsx]

## Sheet: Table S1
Table S1. Differentially expressed genes identified in the tea-resistant cultivar inoculated with Pestealotia theae at 8 hours post-inoculation.
gene_id	RCK_1	RCK_2	RCK_3	R8_1	R8_2	R8_3	RCK	R8	log2FoldChange	p-value	padj	gene_name	gene_chr	gene_start	gene_end	gene_strand	gene_length	gene_biotype	gene_description	tf_family
CSS0028701	243139	254246	237060	94014	95746.1	92707.8	244815	94156	1.37853	0	0	CSS0028701	Chr6	29913019	29915964	+	908	protein_coding	- && sp|Q96542|RBS_BETPN Ribulose bisphosphate carboxylase small subunit, chloroplastic OS=Betula pendula OX=3505 GN=RBCS PE=2 SV=1 && PF00101:Ribulose bisphosphate carboxylase, small chain|PF12338:Ribulose-1,5-bisphosphate carboxylase small subunit	-
CSS0010537	110889	113087	110939	15683.6	15966.6	16016.7	111638	15888.9	2.81277	0	0	CSS0010537	Chr8	83539642	83540902	-	1261	protein_coding	- && sp|P27495|CB24_TOBAC Chlorophyll a-b binding protein 40, chloroplastic OS=Nicotiana tabacum OX=4097 GN=CAB40 PE=2 SV=1 && PF00504:Chlorophyll A-B binding protein	-
CSS0033329	160947	161153	163742	31887.7	31039	31092.7	161947	31339.8	2.36942	0	0	CSS0033329	Chr11	66106652	66110057	-	1780	protein_coding	- && sp|Q40281|RCA_MALDO Ribulose bisphosphate carboxylase/oxygenase activase, chloroplastic OS=Malus domestica OX=3750 GN=RCA PE=2 SV=1 && PF00004:ATPase family associated with various cellular activities (AAA)	AAA
CSS0004766	254801	247961	252596	23028.2	22289.2	21971.4	251786	22429.6	3.48864	0	0	CSS0004766	Chr6	10477796	10482659	+	1901	protein_coding	- && sp|Q9XGN4|GOLS1_AJURE Galactinol synthase 1 OS=Ajuga reptans OX=38596 GN=GOLS1 PE=1 SV=1 && PF01501:Glycosyl transferase family 8	Glyco_transf_8
CSS0017867	47079.5	47554.8	45936.9	2324.99	2184.36	2314.79	46857.1	2274.71	4.36436	0	0	CSS0017867	Chr7	41197198	41199056	-	1036	protein_coding	- && sp|P12062|CB26_PETSP Chlorophyll a-b binding protein 37, chloroplastic OS=Petunia sp. OX=4104 GN=CAB37 PE=3 SV=1 && PF00504:Chlorophyll A-B binding protein	-
CSS0015153	101950	101279	102311	36093.4	34755.5	35017.1	101847	35288.7	1.52909	0	0	CSS0015153	Chr1	11745372	11748964	-	1224	protein_coding	- && sp|Q04960|DNJH_CUCSA DnaJ protein homolog OS=Cucumis sativus OX=3659 GN=DNAJ1 PE=2 SV=1 && PF00226:DnaJ domain|PF01556:DnaJ C terminal domain|PF00684:DnaJ central domain	DnaJ_C
CSS0034626	34720.4	35318.2	34921.8	10195.7	10420	10307.5	34986.8	10307.7	1.76307	0	0	CSS0034626	Chr10	5851104	5853893	-	921	protein_coding	- && sp|P10708|CB12_SOLLC Chlorophyll a-b binding protein 7, chloroplastic OS=Solanum lycopersicum OX=4081 GN=CAB7 PE=3 SV=1 && PF00504:Chlorophyll A-B binding protein	-
CSS0043476	34485.6	34735.4	34373.9	14974.5	14472.6	14648.6	34531.6	14698.5	1.23214	0	0	CSS0043476	Chr10	137159289	137161584	-	1133	protein_coding	- && sp|Q07473|CB4A_ARATH Chlorophyll a-b binding protein CP29.1, chloroplastic OS=Arabidopsis thaliana OX=3702 GN=LHCB4.1 PE=1 SV=1 && PF00504:Chlorophyll A-B binding protein	-
CSS0049545	59486.8	60452.8	61159.5	11867.7	11803.5	11276.6	60366.4	11649.3	2.37337	0	0	CSS0049545	Chr11	66085275	66088765	+	1856	protein_coding	- && sp|Q7X9A0|RCA1_LARTR Ribulose bisphosphate carboxylase/oxygenase activase 1, chloroplastic OS=Larrea tridentata OX=66636 GN=RCA1 PE=1 SV=1 && PF00004:ATPase family associated with various cellular activities (AAA)	AAA
CSS0026940	132.452	127.737	142.267	29385.2	28008.2	28591.1	134.152	28661.5	-7.73524	0	0	CSS0026940	Chr12	105526113	105526978	-	825	protein_coding	- && sp|Q942D4|BURP3_ORYSJ BURP domain-containing protein 3 OS=Oryza sativa subsp. japonica OX=39947 GN=BURP3 PE=2 SV=1 && PF03181:BURP domain	-
CSS0044830	5730.54	5704.84	5635.9	32729.2	32046.5	32174.3	5690.43	32316.6	-2.50582	0	0	CSS0044830	Chr2	154035187	154046169	-	2003	protein_coding	- && sp|Q9M3B1|WSD6_ARATH Wax ester synthase/diacylglycerol acyltransferase 6 OS=Arabidopsis thaliana OX=3702 GN=WSD6 PE=1 SV=1 && PF03007:Wax ester synthase-like Acyl-CoA acyltransferase domain|PF06974:Protein of unknown function (DUF1298)	-
CSS0022476	6855.38	7060.91	7235.44	58470.5	57983.6	56347	7050.58	57600.4	-3.03016	0	0	CSS0022476	Chr7	43386826	43389680	-	1265	protein_coding	- && sp|Q8S932|ACCO_DIOKA 1-aminocyclopropane-1-carboxylate oxidase OS=Diospyros kaki OX=35925 GN=DK-ACO1 PE=2 SV=1 && PF03171:2OG-Fe(II) oxygenase superfamily|PF14226:non-haem dioxygenase in morphine synthesis N-terminal	2OG-FeII_Oxy
CSS0038744	21199.3	20825.7	21269	42535	44554.6	43609.3	21098	43566.3	-1.04596	0	0	CSS0038744	Chr2	41146531	41151708	+	4990	protein_coding	- && - && -	-
CSS0001445	38316.6	40722	40034.8	18019.6	18143.3	17664.5	39691.1	17942.5	1.14532	0	0	CSS0001445	Chr5	4880338	4883804	+	791	protein_coding	- && sp|Q40519|PSBR_TOBAC Photosystem II 10 kDa polypeptide, chloroplastic OS=Nicotiana tabacum OX=4097 GN=PSBR PE=2 SV=1 && PF04725:Photosystem II 10 kDa polypeptide PsbR	-
CSS0015941	26768.3	27103.1	27705.6	394.549	401.83	344.235	27192.3	380.205	6.15878	0	0	CSS0015941	Chr5	23574572	23576713	-	1123	protein_coding	- && sp|P27489|CB23_SOLLC Chlorophyll a-b binding protein 13, chloroplastic OS=Solanum lycopersicum OX=4081 GN=CAB13 PE=1 SV=1 && PF00504:Chlorophyll A-B binding protein	-
CSS0016271	21038.7	21007.1	21200.7	3211.57	3048.01	2920.13	21082.2	3059.9	2.78399	0	0	CSS0016271	Chr5	32921874	32923966	+	825	protein_coding	- && sp|Q9SY97|LHCA3_ARATH Photosystem I chlorophyll a/b-binding protein 3-1, chloroplastic OS=Arabidopsis thaliana OX=3702 GN=LHCA3 PE=1 SV=1 && PF00504:Chlorophyll A-B binding protein	-
CSS0007224	43049.8	42038.1	42309.1	15457.3	15207.7	14869.6	42465.7	15178.2	1.48424	0	0	CSS0007224	Contig518	122907	128530	-	3053	protein_coding	- && sp|P51118|GLNA1_VITVI Glutamine synthetase cytosolic isozyme 1 OS=Vitis vinifera OX=29760 GN=GS1-1 PE=2 SV=1 && PF00120:Glutamine synthetase, catalytic domain|PF03951:Glutamine synthetase, beta-Grasp domain	-
CSS0028943	44205.7	45982	44462.4	5534.72	5455.18	5403.12	44883.4	5464.34	3.03783	0	0	CSS0028943	Chr9	162312767	162316729	-	1816	protein_coding	- && sp|P12859|G3PB_PEA Glyceraldehyde-3-phosphate dehydrogenase B, chloroplastic OS=Pisum sativum OX=3888 GN=GAPB PE=1 SV=2 && PF00044:Glyceraldehyde 3-phosphate dehydrogenase, NAD binding domain|PF02800:Glyceraldehyde 3-phosphate dehydrogenase, C-terminal domain	-
CSS0011421	413.41	379.79	356.629	26046.7	25498.1	25030.4	383.277	25525.1	-6.05821	0	0	CSS0011421	Chr4	192065273	192067041	-	783	protein_coding	- && sp|A0A2J6KL39|NLTP_LACSA Non-specific lipid-transfer protein Lac s 1 OS=Lactuca sativa OX=4236 GN=LSAT_1X82001 PE=1 SV=1 && PF00234:Protease inhibitor/seed storage/LTP family	-
CSS0010636	28764.1	28991.8	28187.2	2929.23	2633.8	2751.93	28647.7	2771.65	3.36915	0	0	CSS0010636	Chr3	35010073	35013001	-	1381	protein_coding	- && sp|P27524|CB4A_SOLLC Chlorophyll a-b binding protein CP24 10A, chloroplastic OS=Solanum lycopersicum OX=4081 GN=CAP10A PE=3 SV=1 && PF00504:Chlorophyll A-B binding protein	-
CSS0028096	39702.4	39773.1	39554.1	9860.05	9703.92	9800.92	39676.5	9788.3	2.01911	0	0	CSS0028096	Chr1	18326921	18332120	+	1799	protein_coding	- && sp|O48902|MDHP_MEDSA Malate dehydrogenase [NADP], chloroplastic OS=Medicago sativa OX=3879 GN=MDH1 PE=2 SV=1 && PF02866:lactate/malate dehydrogenase, alpha/beta C-terminal domain|PF00056:lactate/malate dehydrogenase, NAD binding domain	-
CSS0021668	653.227	611.314	698.84	14603.8	14958.2	15518.9	654.461	15027	-4.51745	0	0	CSS0021668	Contig1007	730193	734262	+	1725	protein_coding	- && sp|Q9SB81|PER42_ARATH Peroxidase 42 OS=Arabidopsis thaliana OX=3702 GN=PER42 PE=1 SV=2 && PF00141:Peroxidase	-
CSS0001348	36773.4	34914.5	38096.9	15292.7	14729.7	14255.4	36594.9	14759.3	1.31008	0	0	CSS0001348	Contig682	150882	152337	-	237	protein_coding	- && sp|Q40410|MT2_NICPL Metallothionein-like protein type 2 OS=Nicotiana plumbaginifolia OX=4092 PE=3 SV=1 && -	-
CSS0043272	24977.2	25294.3	26134.9	4306.93	4224.93	4310.76	25468.8	4280.88	2.57283	0	0	CSS0043272	Chr1	149086329	149091439	-	2005	protein_coding	- && sp|Q9SSV4|INO1_NICPA Inositol-3-phosphate synthase OS=Nicotiana paniculata OX=62141 GN=INPS1 PE=2 SV=1 && PF07994:Myo-inositol-1-phosphate synthase|PF01658:Myo-inositol-1-phosphate synthase	-
CSS0029129	39409.4	40825.8	39987.7	12916.2	13321.3	13295.1	40074.3	13177.5	1.60458	0	0	CSS0029129	Contig1125	149543	152292	+	1014	protein_coding	- && sp|Q9ZSW9|TCTP_HEVBR Translationally-controlled tumor protein homolog OS=Hevea brasiliensis OX=3981 GN=TCTP PE=2 SV=1 && PF00838:Translationally controlled tumour protein	-
CSS0015209	17722.4	17544.5	17082.6	6627.32	7234.85	6691.07	17449.9	6851.08	1.34879	0	0	CSS0015209	Chr2	6653624	6658707	-	1188	protein_coding	- && sp|P27141|CAHC_TOBAC Carbonic anhydrase, chloroplastic OS=Nicotiana tabacum OX=4097 PE=2 SV=1 && PF00484:Carbonic anhydrase	-
CSS0016237	23768	23316.6	24216.2	9445.27	8698.39	8768.22	23767	8970.63	1.40561	0	0	CSS0016237	Chr7	5221244	5222643	-	426	protein_coding	- && sp|Q40519|PSBR_TOBAC Photosystem II 10 kDa polypeptide, chloroplastic OS=Nicotiana tabacum OX=4097 GN=PSBR PE=2 SV=1 && PF04725:Photosystem II 10 kDa polypeptide PsbR	-
CSS0015608	7154.39	7253.66	7286.39	23427.4	22770.1	23018.8	7231.48	23072.1	-1.67382	0	0	CSS0015608	Contig1318	263706	267648	+	2545	protein_coding	- && sp|P27322|HSP72_SOLLC Heat shock cognate 70 kDa protein 2 OS=Solanum lycopersicum OX=4081 GN=HSC-2 PE=2 SV=1 && PF00012:Hsp70 protein	HSP70
CSS0043717	3802.97	4069.35	3948.88	12379.1	13181.4	12432.6	3940.4	12664.3	-1.68485	0	0	CSS0043717	Chr9	74034407	74038118	+	963	protein_coding	- && sp|Q08655|ASR1_SOLLC Abscisic stress-ripening protein 1 OS=Solanum lycopersicum OX=4081 GN=ASR1 PE=2 SV=1 && PF02496:ABA/WDS induced protein	-
CSS0041210	5273.98	5211	5556.11	28150.9	29115.6	28666.4	5347.03	28644.3	-2.42073	0	0	CSS0041210	Chr15	6062868	6066155	+	2143	protein_coding	- && sp|Q9LUM4|RAP22_ARATH Ethylene-responsive transcription factor RAP2-2 OS=Arabidopsis thaliana OX=3702 GN=RAP2-2 PE=1 SV=2 && PF00847:AP2 domain	AP2
CSS0009401	225.77	169.936	201.866	21993.6	21629.3	22305.9	199.191	21976.3	-6.77745	0	0	CSS0009401	Contig288	199471	203267	+	1452	protein_coding	- && sp|Q6DBP4|PAE8_ARATH Pectin acetylesterase 8 OS=Arabidopsis thaliana OX=3702 GN=PAE8 PE=2 SV=1 && PF03283:Pectinacetylesterase	-
CSS0002726	3808.99	3918.8	3871.98	12495	12101.6	12363.1	3866.59	12319.9	-1.67215	0	0	CSS0002726	Chr3	161906506	161911856	+	2227	protein_coding	- && sp|Q50EK3|C04C1_PINTA Cytochrome P450 704C1 OS=Pinus taeda OX=3352 GN=CYP704C1 PE=2 SV=1 && PF00067:Cytochrome P450	p450
CSS0039199	30248.1	28220.8	29681	21.153	21.9007	32.2721	29383.3	25.1086	10.1989	0	0	CSS0039199	Chr6	78437222	78448297	-	2154	protein_coding	- && sp|A0A0G3VTN5|LHY_PETHY Protein LATE ELONGATED HYPOCOTYL OS=Petunia hybrida OX=4102 GN=LHY PE=2 SV=1 && PF00249:Myb-like DNA-binding domain	Myb_DNA-binding
CSS0046668	756.58	688.869	756.516	5451.95	5316.16	5134.19	733.988	5300.77	-2.85026	0	0	CSS0046668	Chr3	54296421	54297467	+	1047	protein_coding	- && - && PF04398:Protein of unknown function, DUF538	-
CSS0038817	20527	20341	19617.5	8613.86	8361.31	8708.56	20161.8	8561.25	1.23565	0	0	CSS0038817	Chr5	33598597	33605659	+	1487	protein_coding	- && sp|Q9LRR9|GLO1_ARATH (S)-2-hydroxy-acid oxidase GLO1 OS=Arabidopsis thaliana OX=3702 GN=GLO1 PE=1 SV=1 && PF01070:FMN-dependent dehydrogenase	FMN_dh
CSS0013089	6088.76	6674.28	6946.1	347.645	276.139	287.515	6569.71	303.766	4.43298	0	0	CSS0013089	Chr8	83573828	83577346	+	825	protein_coding	- && sp|P27495|CB24_TOBAC Chlorophyll a-b binding protein 40, chloroplastic OS=Nicotiana tabacum OX=4097 GN=CAB40 PE=2 SV=1 && PF00504:Chlorophyll A-B binding protein	-
CSS0042958	562.919	542.884	485.439	25597	23379.5	25094.9	530.414	24690.5	-5.54294	0	0	CSS0042958	Chr3	33600081	33601383	-	1303	protein_coding	- && sp|O82161|PHI1_TOBAC Protein PHOSPHATE-INDUCED 1 OS=Nicotiana tabacum OX=4097 GN=PHI-1 PE=2 SV=1 && PF04674:Phosphate-induced protein 1 conserved region	-
CSS0027701	1731.91	1754.11	1701.44	15698.3	14945.8	15208	1729.15	15284	-3.14454	0	0	CSS0027701	Contig92	64674	67056	+	2085	protein_coding	- && sp|P33629|TBA_PRUDU Tubulin alpha chain OS=Prunus dulcis OX=3755 GN=TUBA PE=2 SV=1 && -	-
CSS0035636	18712.8	19385.3	19432	3831.45	3765.02	3672.17	19176.7	3756.21	2.35175	0	0	CSS0035636	Chr13	86871995	86874247	+	673	protein_coding	- && sp|Q41387|PSBW_SPIOL Photosystem II reaction center W protein, chloroplastic OS=Spinacia oleracea OX=3562 GN=psbW PE=1 SV=1 && PF07123:Photosystem II reaction centre W protein (PsbW)	-
CSS0014740	43913.7	43548.2	43625.1	52.4226	34.2794	37.1618	43695.7	41.2879	10.0418	0	0	CSS0014740	Chr4	177997047	178001283	-	2808	protein_coding	- && sp|Q7X9A0|RCA1_LARTR Ribulose bisphosphate carboxylase/oxygenase activase 1, chloroplastic OS=Larrea tridentata OX=66636 GN=RCA1 PE=1 SV=1 && PF00004:ATPase family associated with various cellular activities (AAA)	AAA
CSS0045875	215.736	173.358	156.686	12986.1	13599.4	13703.9	181.927	13429.8	-6.206	0	0	CSS0045875	Chr13	44485636	44489457	-	1755	protein_coding	- && sp|Q6PWU2|ATESY_VITVI (-)-alpha-terpineol synthase OS=Vitis vinifera OX=29760 PE=1 SV=1 && PF01397:Terpene synthase, N-terminal domain|PF03936:Terpene synthase family, metal binding domain	-
CSS0005211	18232.2	18039.5	18151.6	4644.46	4690.56	4604.15	18141.1	4646.39	1.96509	0	0	CSS0005211	Chr7	35151095	35156221	-	1520	protein_coding	- && sp|Q9LRR9|GLO1_ARATH (S)-2-hydroxy-acid oxidase GLO1 OS=Arabidopsis thaliana OX=3702 GN=GLO1 PE=1 SV=1 && PF01070:FMN-dependent dehydrogenase	FMN_dh
CSS0000467	1958.68	1933.17	1786.03	6825.06	6586.4	6576.65	1892.63	6662.7	-1.81661	0	0	CSS0000467	Chr1	7378492	7379857	-	866	protein_coding	- && sp|Q6K5Q0|GL21_ORYSJ Putative germin-like protein 2-1 OS=Oryza sativa subsp. japonica OX=39947 GN=Os02g0491600 PE=3 SV=1 && PF00190:Cupin	-
CSS0031750	42.1437	46.761	45.1795	11333.4	10157.2	10708.5	44.6947	10733	-7.91018	0	0	CSS0031750	Chr14	10648591	10655818	-	2069	protein_coding	- && sp|Q570B4|KCS10_ARATH 3-ketoacyl-CoA synthase 10 OS=Arabidopsis thaliana OX=3702 GN=FDH PE=1 SV=2 && PF08541:3-Oxoacyl-[acyl-carrier-protein (ACP)] synthase III C terminal|PF08392:FAE1/Type III polyketide synthase-like protein	-
CSS0016317	13119.7	13163.8	12834.8	61.6196	69.511	61.6103	13039.4	64.2469	7.66511	0	0	CSS0016317	Chr13	18088160	18093884	-	4613	protein_coding	- && sp|Q9FNB0|CHLH_ARATH Magnesium-chelatase subunit ChlH, chloroplastic OS=Arabidopsis thaliana OX=3702 GN=CHLH PE=1 SV=1 && PF02514:CobN/Magnesium Chelatase|PF11965:Domain of unknown function (DUF3479)	-
CSS0013949	16455.1	16936.6	16586.6	7039.35	7357.69	7228.94	16659.4	7208.66	1.2085	0	0	CSS0013949	Chr13	125429664	125430604	+	941	protein_coding	- && sp|Q43517|FER1_SOLLC Ferredoxin-1, chloroplastic OS=Solanum lycopersicum OX=4081 GN=SEND33 PE=2 SV=1 && PF00111:2Fe-2S iron-sulfur cluster binding domain	Fer2
CSS0018005	25947.5	26458.7	25044.8	4456.84	4110.67	4332.28	25817	4299.93	2.58567	0	0	CSS0018005	Contig1248	438220	440723	-	1257	protein_coding	- && sp|Q9SY97|LHCA3_ARATH Photosystem I chlorophyll a/b-binding protein 3-1, chloroplastic OS=Arabidopsis thaliana OX=3702 GN=LHCA3 PE=1 SV=1 && PF00504:Chlorophyll A-B binding protein	-
CSS0021466	17597	16954.9	17404.7	4835.76	4518.21	4663.8	17318.8	4672.59	1.89002	0	0	CSS0021466	Chr13	132748111	132787189	+	5643	protein_coding	- && sp|F4JKH6|TSS_ARATH Protein TSS OS=Arabidopsis thaliana OX=3702 GN=TSS PE=1 SV=1 && PF12807:Translation initiation factor eIF3 subunit 135|PF13424:Tetratricopeptide repeat|PF15044:Mitochondrial function, CLU-N-term	-
CSS0015005	2846.71	3056.57	2961.66	12129.9	12464.4	11948.5	2954.98	12180.9	-2.04412	0	0	CSS0015005	Chr9	17859969	17863646	-	1222	protein_coding	- && sp|Q38832|IAA14_ARATH Auxin-responsive protein IAA14 OS=Arabidopsis thaliana OX=3702 GN=IAA14 PE=1 SV=2 && PF02309:AUX/IAA family	-
CSS0014637	1091.72	1061.82	1159.29	8382.1	8832.65	8498.31	1104.28	8571.02	-2.95469	0	0	CSS0014637	Chr3	12254525	12255734	-	662	protein_coding	- && sp|P17772|OSS2_PEA Organ-specific protein S2 OS=Pisum sativum OX=3888 PE=2 SV=1 && PF10950:Organ specific protein	-
CSS0011775	138.472	133.44	165.338	6865.52	6488.32	6612.84	145.75	6655.56	-5.50638	0	0	CSS0011775	Chr9	5855475	5865861	-	2647	protein_coding	- && sp|Q9FGY1|BXL1_ARATH Beta-D-xylosidase 1 OS=Arabidopsis thaliana OX=3702 GN=BXL1 PE=1 SV=1 && PF14310:Fibronectin type III-like domain|PF00933:Glycosyl hydrolase family 3 N terminal domain|PF01915:Glycosyl hydrolase family 3 C-terminal domain	Glyco_hydro_3_C
CSS0022212	1393.75	1496.35	1363.07	10245.4	10103.8	10176.5	1417.73	10175.2	-2.84545	0	0	CSS0022212	Chr11	115906019	115911249	-	2204	protein_coding	- && sp|P48418|C75A1_PETHY Flavonoid 3',5'-hydroxylase 1 OS=Petunia hybrida OX=4102 GN=CYP75A1 PE=1 SV=1 && PF00067:Cytochrome P450	p450
CSS0010092	16176.2	17110	16828.9	1935.04	2001.53	1987.18	16705	1974.58	3.08072	0	0	CSS0010092	Chr7	73152206	73155421	-	546	protein_coding	- && sp|Q9XFH9|TRXF2_ARATH Thioredoxin F2, chloroplastic OS=Arabidopsis thaliana OX=3702 GN=At5g16400 PE=1 SV=1 && PF00085:Thioredoxin	-
CSS0043962	4362.88	4778.75	4764.03	28803.9	28905.1	28240	4635.22	28649.7	-2.62821	0	0	CSS0043962	Chr11	7844287	7845442	-	845	protein_coding	- && sp|Q93WF6|SAG21_ARATH Protein SENESCENCE-ASSOCIATED GENE 21, mitochondrial OS=Arabidopsis thaliana OX=3702 GN=SAG21 PE=2 SV=1 && -	-
CSS0025903	28152	27019.9	28638	9137.17	9667.74	9412.68	27936.6	9405.86	1.57077	0	0	CSS0025903	Chr13	14906831	14908122	+	1292	protein_coding	- && sp|Q0ZIW9|CCSA_VITVI Cytochrome c biogenesis protein CcsA OS=Vitis vinifera OX=29760 GN=ccsA PE=3 SV=1 && PF01578:Cytochrome C assembly protein	-
CSS0002529	17888	18028.1	18206.4	5455.63	5520.88	5427.57	18040.8	5468.03	1.72218	0	0	CSS0002529	Chr2	76657713	76663629	-	1481	protein_coding	- && sp|Q43843|RPE_SOLTU Ribulose-phosphate 3-epimerase, chloroplastic (Fragment) OS=Solanum tuberosum OX=4113 PE=1 SV=1 && PF00834:Ribulose-phosphate 3 epimerase family	-
CSS0032602	336.146	426.551	398.925	8938.52	9602.03	8999.01	387.208	9179.85	-4.57096	0	0	CSS0032602	Chr1	36766285	36775780	+	4819	protein_coding	- && sp|Q68CM3|TCS2_CAMSI Probable caffeine synthase 2 OS=Camellia sinensis OX=4442 GN=TCS2 PE=2 SV=1 && -	-
CSS0011810	4572.59	4603.11	4814.98	11247.9	11805.4	11565.1	4663.56	11539.5	-1.30666	0	0	CSS0011810	Chr4	42177845	42179038	-	761	protein_coding	- && - && PF02496:ABA/WDS induced protein	-
CSS0043340	1293.41	1307.03	1261.18	11196.4	10735.2	10863.9	1287.21	10931.8	-3.08699	0	0	CSS0043340	Chr10	160377791	160388021	-	2918	protein_coding	- && sp|Q94A08|RFS2_ARATH Probable galactinol--sucrose galactosyltransferase 2 OS=Arabidopsis thaliana OX=3702 GN=RFS2 PE=2 SV=2 && PF05691:Raffinose synthase or seed imbibition protein Sip1	-
CSS0021124	12193.6	12378	12253.2	4661.01	4722.94	4892.64	12274.9	4758.86	1.36714	0	0	CSS0021124	Chr3	54038329	54043612	-	1536	protein_coding	- && sp|Q9SA52|CP41B_ARATH Chloroplast stem-loop binding protein of 41 kDa b, chloroplastic OS=Arabidopsis thaliana OX=3702 GN=CSP41B PE=1 SV=1 && PF01370:NAD dependent epimerase/dehydratase family	Epimerase
CSS0018150	5893.09	6094.9	5910.82	19861.7	19231.7	19375.9	5966.27	19489.8	-1.70829	0	0	CSS0018150	Chr3	10729901	10731025	-	844	protein_coding	- && sp|Q03878|GRP1_DAUCA Glycine-rich RNA-binding protein OS=Daucus carota OX=4039 PE=2 SV=1 && PF00076:RNA recognition motif. (a.k.a. RRM, RBD, or RNP domain)	RRM_1
CSS0008853	15194.8	15810.9	16076.2	5644.17	5521.84	5492.12	15694	5552.71	1.49885	0	0	CSS0008853	Chr1	167968976	167970878	-	1107	protein_coding	- && sp|P40619|HMGL_IPONI HMG1/2-like protein OS=Ipomoea nil OX=35883 PE=2 SV=1 && PF00505:HMG (high mobility group) box	HMG_box
CSS0015863	14938.9	14878	15057.3	6286.12	5959.85	6181.56	14958.1	6142.51	1.28401	0	0	CSS0015863	Chr3	1051645	1069271	+	1783	protein_coding	- && sp|Q9SAR5|AKR2A_ARATH Ankyrin repeat domain-containing protein 2A OS=Arabidopsis thaliana OX=3702 GN=AKR2A PE=1 SV=2 && -	-
CSS0017161	1578.38	1633.21	1545.71	19694.3	20395.3	20362.7	1585.77	20150.8	-3.66885	0	0	CSS0017161	Chr10	108554377	108557794	-	1435	protein_coding	- && sp|Q9SJL2|HIP5_ARATH Heavy metal-associated isoprenylated plant protein 5 OS=Arabidopsis thaliana OX=3702 GN=HIPP05 PE=1 SV=2 && PF00403:Heavy-metal-associated domain	HMA
novel.4484	15116.5	16843.1	17144.2	3505.88	3357.47	3493.21	16367.9	3452.19	2.24522	0	0	-	Chr3	41933450	41934480	-	868	-	- && sp|Q43517|FER1_SOLLC Ferredoxin-1, chloroplastic OS=Solanum lycopersicum OX=4081 GN=SEND33 PE=2 SV=1 && PF00111:2Fe-2S iron-sulfur cluster binding domain	Fer2
CSS0033612	3550.1	3502.51	3536.49	36714.2	34006.1	30954.8	3529.7	33891.7	-3.26329	0	0	CSS0033612	Chr11	34892664	34912789	-	3002	protein_coding	- && sp|O24370|LOX21_SOLTU Linoleate 13S-lipoxygenase 2-1, chloroplastic OS=Solanum tuberosum OX=4113 GN=LOX2.1 PE=1 SV=1 && PF00305:Lipoxygenase|PF01477:PLAT/LH2 domain	Lipoxygenase
CSS0048378	1573.36	1685.68	1679.33	5692.91	5604.68	5614.36	1646.12	5637.32	-1.77637	0	0	CSS0048378	Chr10	34704661	34716508	-	2018	protein_coding	- && sp|Q9SX20|PTR18_ARATH Protein NRT1/ PTR FAMILY 3.1 OS=Arabidopsis thaliana OX=3702 GN=NPF3.1 PE=2 SV=1 && PF00854:POT family	-
CSS0022394	10697.5	10732.2	11210.3	3931.7	3981.17	3883.4	10880	3932.09	1.46845	0	0	CSS0022394	Chr6	9455690	9462327	-	2071	protein_coding	- && sp|Q9S7E9|GGT2_ARATH Glutamate--glyoxylate aminotransferase 2 OS=Arabidopsis thaliana OX=3702 GN=GGAT2 PE=1 SV=1 && PF00155:Aminotransferase class I and II	Aminotran_1_2
CSS0043677	1754.98	1710.77	1803.33	27238.6	25115.4	24693	1756.36	25682.3	-3.86928	0	0	CSS0043677	Chr11	43624636	43633948	+	4872	protein_coding	- && sp|Q2PCF1|PDR2_NICPL Pleiotropic drug resistance protein 2 OS=Nicotiana plumbaginifolia OX=4092 GN=PDR2 PE=2 SV=1 && PF14510:ABC-transporter N-terminal|PF01061:ABC-2 type transporter|PF08370:Plant PDR ABC transporter associated|PF00005:ABC transporter	ABC2_membrane
CSS0018348	13064.5	12976.7	12948.2	5738.9	5714.18	5702.37	12996.5	5718.48	1.1844	0	0	CSS0018348	Chr10	13620083	13628896	-	2065	protein_coding	- && sp|Q9S7E9|GGT2_ARATH Glutamate--glyoxylate aminotransferase 2 OS=Arabidopsis thaliana OX=3702 GN=GGAT2 PE=1 SV=1 && PF00155:Aminotransferase class I and II	Aminotran_1_2
CSS0003616	14813.5	13876.6	14118.1	1659.13	1647.31	1603.82	14269.4	1636.76	3.12394	0	0	CSS0003616	Chr5	35600253	35602914	+	1339	protein_coding	- && - && PF04832:SOUL heme-binding protein	-
CSS0039961	2057.01	1873.86	1941.76	11333.4	11036.1	10996	1957.54	11121.8	-2.50532	0	0	CSS0039961	Chr6	164826015	164832673	-	2098	protein_coding	- && sp|O65554|CIPK6_ARATH CBL-interacting serine/threonine-protein kinase 6 OS=Arabidopsis thaliana OX=3702 GN=CIPK6 PE=1 SV=1 && PF00069:Protein kinase domain|PF03822:NAF domain	Pkinase
CSS0015379	12512.7	12821.6	12952.1	2427.08	2370.99	2435.07	12762.1	2411.05	2.40415	0	0	CSS0015379	Chr11	99709871	99714080	-	1481	protein_coding	- && sp|Q56YA5|SGAT_ARATH Serine--glyoxylate aminotransferase OS=Arabidopsis thaliana OX=3702 GN=AGT1 PE=1 SV=2 && PF00266:Aminotransferase class-V	Aminotran_5
CSS0023752	15730.6	15861.1	15740.7	3255.72	3168.94	3194.93	15777.5	3206.53	2.29862	0	0	CSS0023752	Chr10	30715919	30734067	+	4758	protein_coding	- && sp|Q9LI74|CHUP1_ARATH Protein CHUP1, chloroplastic OS=Arabidopsis thaliana OX=3702 GN=CHUP1 PE=1 SV=1 && -	-
CSS0039893	3485.89	3245.9	3384.61	47.8241	40.9448	44.0073	3372.13	44.2588	6.25055	0	0	CSS0039893	Chr8	83932184	83933147	+	964	protein_coding	- && sp|P27495|CB24_TOBAC Chlorophyll a-b binding protein 40, chloroplastic OS=Nicotiana tabacum OX=4097 GN=CAB40 PE=2 SV=1 && PF00504:Chlorophyll A-B binding protein	-
CSS0045784	12584.9	11926.3	12251.3	5155.81	4846.72	4907.31	12254.2	4969.95	1.30199	0	0	CSS0045784	Chr8	139525743	139530954	-	1116	protein_coding	- && sp|Q39224|SRG1_ARATH Protein SRG1 OS=Arabidopsis thaliana OX=3702 GN=SRG1 PE=2 SV=1 && PF14226:non-haem dioxygenase in morphine synthesis N-terminal|PF03171:2OG-Fe(II) oxygenase superfamily	2OG-FeII_Oxy
CSS0012138	1237.22	1142.79	1192.93	10582.9	10261	10106	1190.98	10316.6	-3.11353	0	0	CSS0012138	Chr8	133941065	133947269	-	1484	protein_coding	- && sp|O22960|TBL37_ARATH Protein trichome birefringence-like 37 OS=Arabidopsis thaliana OX=3702 GN=TBL37 PE=2 SV=2 && PF14416:PMR5 N terminal Domain|PF13839:GDSL/SGNH-like Acyl-Esterase family found in Pmr5 and Cas1p	-
CSS0015742	12942.1	13046.3	12964.6	2330.51	2241.49	2295.23	12984.3	2289.07	2.50378	0	0	CSS0015742	Chr7	36565856	36576196	+	4270	protein_coding	- && sp|Q9SHI1|IF2C_ARATH Translation initiation factor IF-2, chloroplastic OS=Arabidopsis thaliana OX=3702 GN=At1g17220 PE=2 SV=2 && PF11987:Translation-initiation factor 2|PF00009:Elongation factor Tu GTP binding domain	GTP_EFTU
CSS0006514	119.407	126.597	115.352	14828.2	14647.8	14612.4	120.452	14696.1	-6.93455	0	0	CSS0006514	Chr14	113388116	113388862	-	747	protein_coding	- && sp|Q00451|PRF1_SOLLC 36.4 kDa proline-rich protein OS=Solanum lycopersicum OX=4081 GN=TPRP-F1 PE=2 SV=1 && PF14547:Hydrophobic seed protein	-
CSS0002336	17936.2	17975.6	18416.9	3063.5	3103.24	3226.23	18109.5	3130.99	2.53242	0	0	CSS0002336	Chr7	13051529	13054624	-	2418	protein_coding	- && sp|Q8RWE8|GGAP1_ARATH GDP-L-galactose phosphorylase 1 OS=Arabidopsis thaliana OX=3702 GN=VTC2 PE=1 SV=1 && -	-
CSS0030597	441.505	448.221	468.136	7870.75	7376.73	7466.58	452.621	7571.35	-4.06339	0	0	CSS0030597	Chr5	148140104	148145948	-	1525	protein_coding	- && sp|P48387|CHS2_CAMSI Chalcone synthase 2 OS=Camellia sinensis OX=4442 GN=CHS2 PE=2 SV=1 && PF00195:Chalcone and stilbene synthases, N-terminal domain|PF02797:Chalcone and stilbene synthases, C-terminal domain	Chal_sti_synt_N
CSS0026669	8691.64	8354.25	8809.03	2141.97	2197.69	2214.06	8618.31	2184.57	1.98053	0	0	CSS0026669	Chr5	36234259	36237306	+	1861	protein_coding	- && sp|A0A068Q6L2|C7317_PRUMU Cytochrome P450 736A117 OS=Prunus mume OX=102107 GN=CYP736A117 PE=2 SV=1 && PF00067:Cytochrome P450	p450
CSS0007766	589.008	614.736	645.009	9940.98	9645.83	9638.59	616.251	9741.8	-3.9819	0	0	CSS0007766	Chr9	43417830	43423737	-	4074	protein_coding	- && - && PF04554:Extensin-like region|PF01190:Pollen proteins Ole e I like	-
CSS0029437	916.124	835.995	855.526	7824.76	7423.39	7637.72	869.215	7628.62	-3.13261	0	0	CSS0029437	Chr13	54464193	54470962	+	2866	protein_coding	- && sp|Q42699|METE_CATRO 5-methyltetrahydropteroyltriglutamate--homocysteine methyltransferase OS=Catharanthus roseus OX=4058 GN=METE PE=2 SV=1 && PF08267:Cobalamin-independent synthase, N-terminal domain|PF01717:Cobalamin-independent synthase, Catalytic domain	-
CSS0045851	10529.9	10798.4	10646	4019.99	4119.24	4022.27	10658.1	4053.83	1.39448	0	0	CSS0045851	Contig1290	291835	298055	-	1767	protein_coding	- && - && -	-
CSS0044676	10607.2	10160.8	10300	3692.58	3426.03	3377.81	10356	3498.81	1.56532	0	0	CSS0044676	Chr10	152012522	152031161	-	2976	protein_coding	- && sp|Q43155|GLTB_SPIOL Ferredoxin-dependent glutamate synthase, chloroplastic OS=Spinacia oleracea OX=3562 GN=FdGOGAT PE=1 SV=3 && PF04898:Glutamate synthase central domain|PF01493:GXGXG motif|PF01645:Conserved region in glutamate synthase	-
CSS0029473	9810.45	9471.95	9688.59	3764.31	3810.72	3846.24	9657	3807.09	1.34317	0	0	CSS0029473	Chr13	73547565	73552702	+	3092	protein_coding	- && sp|Q9SJ56|BLH1_ARATH BEL1-like homeodomain protein 1 OS=Arabidopsis thaliana OX=3702 GN=BLH1 PE=1 SV=1 && PF05920:Homeobox KN domain|PF07526:Associated with HOX	POX
CSS0037340	1494.09	1395.99	1255.41	7767.74	7398.63	8187.32	1381.83	7784.57	-2.49473	0	0	CSS0037340	Chr8	130261734	130265744	-	2831	protein_coding	- && sp|Q05349|12KD_FRAAN Auxin-repressed 12.5 kDa protein OS=Fragaria ananassa OX=3747 PE=2 SV=1 && PF05564:Dormancy/auxin associated protein	-
CSS0027479	1959.68	1936.59	1969.63	7147.87	7593.83	7332.6	1955.3	7358.1	-1.91162	0	0	CSS0027479	Chr10	165089037	165090550	+	594	protein_coding	- && - && -	-
CSS0017296	12616	12647.1	12750.2	4062.29	4159.23	4239.37	12671.1	4153.63	1.60932	0	0	CSS0017296	Chr7	15635692	15637083	-	609	protein_coding	- && sp|A6MZM2|SUI1_ORYSI Protein translation factor SUI1 homolog OS=Oryza sativa subsp. indica OX=39946 GN=GOS2 PE=2 SV=1 && PF01253:Translation initiation factor SUI1	SUI1
CSS0007572	9791.39	9758.22	9738.58	3177.55	3083.24	3116.7	9762.73	3125.83	1.64294	0	0	CSS0007572	Chr13	86424789	86426125	-	1242	protein_coding	- && sp|P08283|H1_PEA Histone H1 OS=Pisum sativum OX=3888 PE=2 SV=1 && PF00538:linker histone H1 and H5 family	-
CSS0042900	1978.75	1849.91	1967.71	7106.48	7411.96	6853.41	1932.12	7123.95	-1.88157	0	0	CSS0042900	Chr10	123305997	123309865	+	768	protein_coding	- && sp|P43390|MT2_ACTDE Metallothionein-like protein type 2 OS=Actinidia deliciosa OX=3627 GN=pKIWI504 PE=2 SV=1 && -	-
CSS0007310	9522.47	9280.35	9254.1	3373.44	3472.69	3356.29	9352.31	3400.81	1.45947	0	0	CSS0007310	Chr5	183708266	183714610	-	1940	protein_coding	- && sp|O22506|GLNA2_DAUCA Glutamine synthetase, chloroplastic OS=Daucus carota OX=4039 GN=GLN2 PE=2 SV=1 && PF03951:Glutamine synthetase, beta-Grasp domain|PF00120:Glutamine synthetase, catalytic domain	-
CSS0017602	18244.2	18233.4	17628.6	3716.49	3582.19	3575.35	18035.4	3624.68	2.31459	0	0	CSS0017602	Chr12	121066992	121073726	-	2274	protein_coding	- && sp|O49675|CCD4_ARATH Probable carotenoid cleavage dioxygenase 4, chloroplastic OS=Arabidopsis thaliana OX=3702 GN=CCD4 PE=1 SV=1 && PF03055:Retinal pigment epithelial membrane protein	RPE65
novel.4837	15132.6	14668.1	15062.1	4724.47	4657.23	4713.68	14954.3	4698.46	1.67045	0	0	-	Chr4	50211259	50214892	+	1011	-	- && sp|P32024|JI23_HORVU 23 kDa jasmonate-induced protein OS=Hordeum vulgare OX=4513 PE=2 SV=1 && -	-
CSS0014245	5849.95	5781.26	5908.9	829.565	836.988	721.72	5846.7	796.091	2.87585	0	0	CSS0014245	Chr13	121327144	121328515	-	1199	protein_coding	- && sp|P27524|CB4A_SOLLC Chlorophyll a-b binding protein CP24 10A, chloroplastic OS=Solanum lycopersicum OX=4081 GN=CAP10A PE=3 SV=1 && PF00504:Chlorophyll A-B binding protein	-
CSS0005385	25996.6	23824.2	26302.1	3041.43	3043.25	2999.34	25374.3	3028.01	3.0671	0	0	CSS0005385	Chr3	84420510	84426522	+	964	protein_coding	- && sp|P42764|JIPH_ATRCA Jasmonate-induced protein homolog OS=Atriplex canescens OX=35922 PE=2 SV=1 && -	-
CSS0042072	2432.29	2486.32	2395.47	9059	8978.34	9029.33	2438.03	9022.22	-1.8884	0	0	CSS0042072	Chr10	156119297	156122496	+	2978	protein_coding	- && sp|Q39096|ERD15_ARATH Protein EARLY RESPONSIVE TO DEHYDRATION 15 OS=Arabidopsis thaliana OX=3702 GN=ERD15 PE=1 SV=1 && -	-
CSS0001177	10046.3	9344.21	9803.94	1956.19	1799.67	1930.46	9731.47	1895.44	2.36028	0	0	CSS0001177	Chr11	98834230	98841203	-	1490	protein_coding	- && sp|Q56YA5|SGAT_ARATH Serine--glyoxylate aminotransferase OS=Arabidopsis thaliana OX=3702 GN=AGT1 PE=1 SV=2 && PF00266:Aminotransferase class-V	Aminotran_5
CSS0033400	13.0445	11.4051	19.2253	9185.91	9558.23	9406.81	14.5583	9383.65	-9.31273	0	0	CSS0033400	Chr2	28055456	28058346	+	1363	protein_coding	- && sp|Q8LER3|XTH7_ARATH Probable xyloglucan endotransglucosylase/hydrolase protein 7 OS=Arabidopsis thaliana OX=3702 GN=XTH7 PE=2 SV=2 && -	-
CSS0034985	7217.61	7087.14	7149.89	1822.84	1845.37	1640.98	7151.55	1769.73	2.01433	0	0	CSS0034985	Chr3	1148814	1231485	+	4216	protein_coding	- && sp|P93025|PHOT2_ARATH Phototropin-2 OS=Arabidopsis thaliana OX=3702 GN=PHOT2 PE=1 SV=2 && PF13426:PAS domain|PF00069:Protein kinase domain	Pkinase
CSS0048811	128.438	131.159	115.352	1871.58	1913.93	1921.65	124.983	1902.39	-3.93127	0	0	CSS0048811	Chr2	141246194	141255932	+	2656	protein_coding	- && sp|Q8RXN0|AB11G_ARATH ABC transporter G family member 11 OS=Arabidopsis thaliana OX=3702 GN=ABCG11 PE=1 SV=1 && PF00005:ABC transporter|PF01061:ABC-2 type transporter	ABC2_membrane
CSS0003089	89.3045	99.2245	97.0878	12493.1	11798.8	11866.3	95.2056	12052.7	-6.9861	0	0	CSS0003089	Contig733	513346	520139	-	1873	protein_coding	- && sp|Q8S9J6|ASPA_ARATH Aspartyl protease family protein At5g10770 OS=Arabidopsis thaliana OX=3702 GN=At5g10770 PE=2 SV=1 && PF14543:Xylanase inhibitor N-terminal|PF14541:Xylanase inhibitor C-terminal	-
CSS0041947	5763.65	5400.32	5658.97	360.52	375.169	384.331	5607.65	373.34	3.90975	0	0	CSS0041947	Chr4	26274333	26278396	+	2214	protein_coding	- && sp|P93111|HEM11_CUCSA Glutamyl-tRNA reductase 1, chloroplastic OS=Cucumis sativus OX=3659 GN=HEMA1 PE=2 SV=1 && PF00745:Glutamyl-tRNAGlu reductase, dimerisation domain|PF01488:Shikimate / quinate 5-dehydrogenase|PF05201:Glutamyl-tRNAGlu reductase, N-terminal domain	-
CSS0002395	10330.2	10278.3	10080.8	848.878	749.385	681.625	10229.8	759.963	3.74904	0	0	CSS0002395	Chr13	121225405	121229990	+	1985	protein_coding	- && sp|A8MQN2|LNK1_ARATH Protein LNK1 OS=Arabidopsis thaliana OX=3702 GN=LNK1 PE=1 SV=1 && -	-
CSS0040122	11842.4	11921.8	11767.8	434.096	400.878	398.022	11844	410.999	4.84778	0	0	CSS0040122	Contig1054	341973	351783	-	2838	protein_coding	- && sp|Q9SCU5|WNK5_ARATH Probable serine/threonine-protein kinase WNK5 OS=Arabidopsis thaliana OX=3702 GN=WNK5 PE=1 SV=2 && PF00069:Protein kinase domain	Pkinase
CSS0048030	39.1334	33.0748	35.5668	3540.83	3170.84	3343.58	35.925	3351.75	-6.53974	0	0	CSS0048030	Chr1	105144819	105149164	+	2195	protein_coding	- && sp|Q9FK05|PME61_ARATH Probable pectinesterase/pectinesterase inhibitor 61 OS=Arabidopsis thaliana OX=3702 GN=PME61 PE=2 SV=1 && PF01095:Pectinesterase|PF04043:Plant invertase/pectin methylesterase inhibitor	-
CSS0031288	7648.08	7636.87	7704.54	1070.52	1040.76	1151.04	7663.16	1087.44	2.81752	0	0	CSS0031288	Chr1	192459407	192468017	+	2505	protein_coding	- && sp|Q40412|ABA2_NICPL Zeaxanthin epoxidase, chloroplastic OS=Nicotiana plumbaginifolia OX=4092 GN=ABA2 PE=1 SV=1 && PF00498:FHA domain|PF01494:FAD binding domain	FHA
CSS0004814	96.3285	114.051	125.926	11102.6	10957	10484.5	112.102	10848	-6.59509	0	0	CSS0004814	Chr12	119654525	119658774	+	1639	protein_coding	- && sp|Q6DBP4|PAE8_ARATH Pectin acetylesterase 8 OS=Arabidopsis thaliana OX=3702 GN=PAE8 PE=2 SV=1 && PF03283:Pectinacetylesterase	-
CSS0034534	3094.55	3150.09	3016.45	11638.7	12359.6	12226.2	3087.03	12074.9	-1.96819	0	0	CSS0034534	Chr15	11521706	11533356	+	3239	protein_coding	- && sp|Q8VZH2|APM1_ARATH Aminopeptidase M1 OS=Arabidopsis thaliana OX=3702 GN=APM1 PE=1 SV=1 && PF11838:ERAP1-like C-terminal domain|PF01433:Peptidase family M1 domain|PF17900:Peptidase M1 N-terminal domain	-
CSS0033306	10171.7	9981.76	10235.6	1712.47	1691.12	1765.18	10129.7	1722.92	2.55599	0	0	CSS0033306	Chr9	84765816	84772628	+	2815	protein_coding	- && sp|Q43125|CRY1_ARATH Cryptochrome-1 OS=Arabidopsis thaliana OX=3702 GN=CRY1 PE=1 SV=2 && PF03441:FAD binding domain of DNA photolyase|PF00875:DNA photolyase|PF12546:Blue/Ultraviolet sensing protein C terminal	-
CSS0036336	6009.49	6081.21	6028.09	1045.69	976.01	1004.35	6039.6	1008.68	2.5816	0	0	CSS0036336	Chr2	77381525	77384244	+	1639	protein_coding	- && sp|Q9ZS34|CHLP_TOBAC Geranylgeranyl diphosphate reductase, chloroplastic OS=Nicotiana tabacum OX=4097 GN=CHLP PE=2 SV=1 && PF07992:Pyridine nucleotide-disulphide oxidoreductase	Pyr_redox_2
CSS0044752	43.1471	38.7774	30.7605	26754.8	25167.7	25542.8	37.5617	25821.8	-9.43087	0	0	CSS0044752	Chr4	182865590	182867234	+	1645	protein_coding	- && sp|Q9FF86|DCR_ARATH BAHD acyltransferase DCR OS=Arabidopsis thaliana OX=3702 GN=DCR PE=2 SV=1 && PF02458:Transferase family	-
CSS0038083	8545.14	8511.64	8748.47	807.492	846.51	843.963	8601.75	832.655	3.36936	0	0	CSS0038083	Chr2	58851419	58859614	+	2930	protein_coding	- && sp|Q9AXU3|SPA15_IPOBA Senescence-associated protein SPA15, chloroplastic OS=Ipomoea batatas OX=4120 GN=SPA15 PE=2 SV=1 && -	-
CSS0025629	452.543	379.79	385.467	3422.18	3160.37	3287.84	405.934	3290.13	-3.01742	0	0	CSS0025629	Chr13	55742795	55747068	+	2065	protein_coding	- && sp|A7LXU3|BGH3B_BACO1 Beta-glucosidase BoGH3B OS=Bacteroides ovatus (strain ATCC 8483 / DSM 1896 / JCM 5824 / NCTC 11153) OX=411476 GN=BACOVA_02659 PE=1 SV=1 && PF01915:Glycosyl hydrolase family 3 C-terminal domain|PF00933:Glycosyl hydrolase family 3 N terminal domain	Glyco_hydro_3
CSS0035972	5493.73	5848.55	5909.86	1088.92	1228.34	1283.06	5750.71	1200.11	2.26127	0	0	CSS0035972	Chr5	33420942	33422848	-	1074	protein_coding	- && sp|Q03666|GSTX4_TOBAC Probable glutathione S-transferase OS=Nicotiana tabacum OX=4097 PE=2 SV=1 && PF02798:Glutathione S-transferase, N-terminal domain|PF13410:Glutathione S-transferase, C-terminal domain	GST_N
CSS0038112	5317.13	5005.71	5094.71	918.775	784.617	874.279	5139.18	859.224	2.58022	0	0	CSS0038112	Chr2	76874110	76875952	+	720	protein_coding	- && sp|P27521|CA4_ARATH Chlorophyll a-b binding protein 4, chloroplastic OS=Arabidopsis thaliana OX=3702 GN=LHCA4 PE=1 SV=1 && PF00504:Chlorophyll A-B binding protein	-
CSS0023501	2002.83	1973.09	2010.01	6618.13	6483.56	6644.13	1995.31	6581.94	-1.72157	0	0	CSS0023501	Chr5	67840386	67853299	+	1854	protein_coding	- && sp|K4CF70|HPL_SOLLC Fatty acid hydroperoxide lyase, chloroplastic OS=Solanum lycopersicum OX=4081 GN=HPL PE=1 SV=1 && PF00067:Cytochrome P450	p450
CSS0013982	7034.99	7421.31	7851.61	545.379	572.275	553.515	7435.97	557.056	3.73888	0	0	CSS0013982	Chr14	63958690	63960504	+	1423	protein_coding	- && sp|Q5XLY0|ANR_GINBI Putative anthocyanidin reductase OS=Ginkgo biloba OX=3311 PE=2 SV=1 && PF01370:NAD dependent epimerase/dehydratase family	Epimerase
CSS0002896	2208.53	2231.98	2224.37	12342.3	12472	12227.2	2221.63	12347.2	-2.47463	0	0	CSS0002896	Chr14	106891909	106895403	+	2938	protein_coding	- && sp|Q708Y0|EBF2_ARATH EIN3-binding F-box protein 2 OS=Arabidopsis thaliana OX=3702 GN=EBF2 PE=1 SV=1 && -	-
novel.1924	149.51	156.25	124.003	8642.37	7721.43	8584.37	143.254	8316.06	-5.86605	0	0	-	Chr12	99303656	99304600	-	945	-	- && sp|P14009|14KD_DAUCA 14 kDa proline-rich protein DC2.15 OS=Daucus carota OX=4039 PE=2 SV=1 && -	-
CSS0005390	1176.01	1100.59	1166.98	6925.3	7359.59	7123.32	1147.86	7136.07	-2.63482	0	0	CSS0005390	Chr8	140186614	140194482	+	2572	protein_coding	- && sp|Q08IT1|DADIS_PANGI Dammarenediol II synthase OS=Panax ginseng OX=4054 GN=DDS PE=1 SV=1 && PF13249:Squalene-hopene cyclase N-terminal domain|PF13243:Squalene-hopene cyclase C-terminal domain	-
novel.3063	329.122	328.467	349.901	3541.75	3312.72	3336.73	335.83	3397.07	-3.33726	0	0	-	Chr15	57005807	57012663	+	1908	-	- && sp|Q70PR7|VINSY_RAUSE Vinorine synthase OS=Rauvolfia serpentina OX=4060 GN=ACT PE=1 SV=2 && PF02458:Transferase family	-
CSS0017830	5613.14	5630.71	5640.7	1877.1	1854.89	1796.48	5628.18	1842.82	1.61053	0	0	CSS0017830	Chr11	95769790	95781897	-	1634	protein_coding	- && sp|Q9FVQ0|YUC10_ARATH Probable indole-3-pyruvate monooxygenase YUCCA10 OS=Arabidopsis thaliana OX=3702 GN=YUC10 PE=2 SV=1 && PF00743:Flavin-binding monooxygenase-like	FMO-like
CSS0025248	7404.25	7839.88	7591.11	2546.64	2474.78	2375.42	7611.75	2465.61	1.62574	0	0	CSS0025248	Chr1	139846428	139851039	+	829	protein_coding	- && sp|P93206|14331_SOLLC 14-3-3 protein 1 OS=Solanum lycopersicum OX=4081 GN=TFT1 PE=3 SV=2 && PF00244:14-3-3 protein	-
CSS0048554	115.393	106.068	118.236	3914.22	3604.1	3498.09	113.232	3672.14	-5.01568	0	0	CSS0048554	Contig579	13342	20500	-	3585	protein_coding	- && sp|Q9SCV9|BGAL3_ARATH Beta-galactosidase 3 OS=Arabidopsis thaliana OX=3702 GN=BGAL3 PE=2 SV=1 && PF01301:Glycosyl hydrolases family 35|PF02140:Galactose binding lectin domain|PF17834:Beta-sandwich domain in beta galactosidase	-
CSS0009095	304.037	272.582	289.341	5785.8	5507.55	5246.65	288.653	5513.34	-4.25331	0	0	CSS0009095	Chr5	114755712	114773497	-	1343	protein_coding	- && sp|Q9SIN2|TBL39_ARATH Protein trichome birefringence-like 39 OS=Arabidopsis thaliana OX=3702 GN=TBL39 PE=2 SV=1 && PF13839:GDSL/SGNH-like Acyl-Esterase family found in Pmr5 and Cas1p|PF14416:PMR5 N terminal Domain	-
CSS0037283	3408.62	3251.6	3229.85	32.1893	27.6139	33.25	3296.69	31.0178	6.73209	0	0	CSS0037283	Chr4	108567980	108569298	+	1319	protein_coding	- && sp|Q5NUF4|HIDM_GLYEC 2-hydroxyisoflavanone dehydratase OS=Glycyrrhiza echinata OX=46348 GN=HIDM PE=1 SV=1 && PF07859:alpha/beta hydrolase fold	Abhydrolase_3
CSS0037920	10744.6	9580.3	9337.73	931.651	978.867	832.228	9887.56	914.248	3.43448	0	0	CSS0037920	Contig55	60760	69373	-	3956	protein_coding	- && sp|O49954|GCSP_SOLTU Glycine dehydrogenase (decarboxylating), mitochondrial OS=Solanum tuberosum OX=4113 GN=GDCSP PE=2 SV=1 && PF02347:Glycine cleavage system P-protein	-
CSS0035453	5998.45	5993.39	6179.97	2063.8	2074.85	2026.29	6057.27	2054.98	1.55963	0	0	CSS0035453	Chr11	94967148	94973674	-	1859	protein_coding	- && sp|Q40153|LE14B_LITER LEC14B protein OS=Lithospermum erythrorhizon OX=34254 PE=2 SV=1 && -	-
CSS0015010	379.293	440.238	415.267	5776.6	5534.21	5672.06	411.599	5660.96	-3.7844	0	0	CSS0015010	Chr13	59186052	59191274	+	1362	protein_coding	- && sp|Q66GR0|FLA17_ARATH Fasciclin-like arabinogalactan protein 17 OS=Arabidopsis thaliana OX=3702 GN=FLA17 PE=2 SV=1 && PF02469:Fasciclin domain	-
CSS0023044	7320.96	7303.84	7428.66	2828.06	2868.04	2792.02	7351.15	2829.37	1.37754	0	0	CSS0023044	Chr11	94428890	94434153	+	1899	protein_coding	- && - && -	-
CSS0017631	97.3319	87.8194	95.1653	7722.68	7344.36	7600.56	93.4389	7555.86	-6.33384	0	0	CSS0017631	Chr3	130369512	130402760	-	1800	protein_coding	- && sp|Q75W17|FURH_VIBFR Furcatin hydrolase OS=Viburnum furcatum OX=237940 PE=1 SV=1 && PF00232:Glycosyl hydrolase family 1	Glyco_hydro_1
CSS0020857	1770.04	1515.74	1748.54	7622.43	7341.5	7131.15	1678.11	7365.03	-2.13198	0	0	CSS0020857	Chr2	63414544	63437215	-	3972	protein_coding	- && sp|Q8GSA7|CMTA3_ARATH Calmodulin-binding transcription activator 3 OS=Arabidopsis thaliana OX=3702 GN=CAMTA3 PE=1 SV=1 && PF03859:CG-1 domain|PF12796:Ankyrin repeats (3 copies)|PF01833:IPT/TIG domain	CG-1
CSS0009305	886.021	940.922	864.177	6235.53	6063.64	6195.26	897.04	6164.81	-2.78275	0	0	CSS0009305	Chr4	41985815	41993483	-	4267	protein_coding	- && sp|O48947|CESA2_ARATH Cellulose synthase A catalytic subunit 2 [UDP-forming] OS=Arabidopsis thaliana OX=3702 GN=CESA2 PE=1 SV=1 && PF03552:Cellulose synthase|PF14569:Zinc-binding RING-finger	-
CSS0010865	8234.08	8475.14	9034.93	13.7954	17.1397	25.4265	8581.38	18.7872	8.84423	0	0	CSS0010865	Chr5	175757143	175758980	+	856	protein_coding	- && sp|P11432|ELI_PEA Early light-induced protein, chloroplastic OS=Pisum sativum OX=3888 PE=2 SV=1 && -	-
CSS0001754	7445.39	7351.74	7345.03	1452.2	1427.36	1419.97	7380.72	1433.17	2.36442	0	0	CSS0001754	Chr9	63522836	63541526	-	6591	protein_coding	- && sp|Q9C5W3|NADK2_ARATH NAD kinase 2, chloroplastic OS=Arabidopsis thaliana OX=3702 GN=NADK2 PE=1 SV=1 && -	-
CSS0019005	7405.25	7460.09	7525.75	857.156	916.021	831.25	7463.69	868.142	3.10374	0	0	CSS0019005	Chr13	87753263	87757506	+	1633	protein_coding	- && sp|P23525|IN37_SPIOL 2-methyl-6-phytyl-1,4-hydroquinone methyltransferase, chloroplastic OS=Spinacia oleracea OX=3562 PE=1 SV=1 && PF08241:Methyltransferase domain	Methyltransf_11
CSS0043875	4451.18	4030.57	4307.43	263.033	203.772	224.926	4263.06	230.577	4.20721	0	0	CSS0043875	Chr4	178622247	178633201	+	288	protein_coding	- && sp|P50162|TRN1_DATST Tropinone reductase 1 OS=Datura stramonium OX=4076 GN=TR1 PE=1 SV=1 && -	-
CSS0048869	8301.31	8129.57	8091.93	2603.66	2524.29	2580.79	8174.27	2569.58	1.66952	0	0	CSS0048869	Chr14	59128330	59130794	+	1527	protein_coding	- && sp|Q38897|BEL1_ARATH Homeobox protein BEL1 homolog OS=Arabidopsis thaliana OX=3702 GN=BEL1 PE=1 SV=2 && PF05920:Homeobox KN domain|PF07526:Associated with HOX	POX
CSS0037992	6258.34	6386.87	6488.54	65.2983	75.2242	74.3235	6377.92	71.6153	6.47851	0	0	CSS0037992	Chr6	78654732	78659425	+	2157	protein_coding	- && sp|O82627|SSG1_ANTMA Granule-bound starch synthase 1, chloroplastic/amyloplastic OS=Antirrhinum majus OX=4151 GN=WAXY PE=2 SV=1 && PF08323:Starch synthase catalytic domain|PF00534:Glycosyl transferases group 1	Glycos_transf_1
CSS0038473	32.1095	21.6697	32.683	3516.91	3357.47	3491.25	28.8207	3455.21	-6.88898	0	0	CSS0038473	Chr9	35125800	35127645	-	1846	protein_coding	- && sp|Q9LIS3|GAE6_ARATH UDP-glucuronate 4-epimerase 6 OS=Arabidopsis thaliana OX=3702 GN=GAE6 PE=1 SV=1 && PF01370:NAD dependent epimerase/dehydratase family	Epimerase
novel.2273	7471.48	7250.23	7348.87	1309.65	1197.87	1139.3	7356.86	1215.61	2.59669	0	0	-	Chr13	5376205	5468335	-	2925	-	- && - && -	-
CSS0010476	994.391	893.021	931.466	6053.43	6028.41	5978.15	939.626	6020	-2.67822	0	0	CSS0010476	Chr2	17085191	17086276	-	1086	protein_coding	- && sp|Q96471|DCAM_IPONI S-adenosylmethionine decarboxylase proenzyme OS=Ipomoea nil OX=35883 GN=SAMDC PE=3 SV=1 && PF01536:Adenosylmethionine decarboxylase	SAM_decarbox
CSS0049536	6902.54	6608.13	6874.97	1434.72	1520.67	1482.56	6795.21	1479.32	2.20006	0	0	CSS0049536	Chr9	44182693	44186747	+	1588	protein_coding	- && sp|Q96288|BBX24_ARATH B-box zinc finger protein 24 OS=Arabidopsis thaliana OX=3702 GN=BBX24 PE=1 SV=1 && PF00643:B-box zinc finger	zf-B_box
CSS0036777	505.724	515.511	534.463	12737.8	12224.4	12081.5	518.566	12347.9	-4.57294	0	0	CSS0036777	Chr7	159422296	159423164	-	869	protein_coding	- && sp|P17407|21KD_DAUCA 21 kDa protein OS=Daucus carota OX=4039 PE=2 SV=1 && PF04043:Plant invertase/pectin methylesterase inhibitor	-
CSS0047836	134.458	134.58	146.112	2721.38	2894.7	2775.4	138.384	2797.16	-4.33504	0	0	CSS0047836	Chr9	34380205	34389984	+	1663	protein_coding	- && sp|Q9SVM9|CER26_ARATH Protein ECERIFERUM 26 OS=Arabidopsis thaliana OX=3702 GN=CER26 PE=2 SV=1 && PF02458:Transferase family	-
CSS0011093	9264.59	9244.99	8936.88	2195.31	2175.79	2173.96	9148.82	2181.69	2.06793	0	0	CSS0011093	Chr6	105131642	105138977	-	1146	protein_coding	- && sp|Q40316|VESTR_MEDSA Vestitone reductase OS=Medicago sativa OX=3879 PE=1 SV=1 && PF01370:NAD dependent epimerase/dehydratase family	Epimerase
CSS0027429	6372.73	6400.55	6255.91	506.752	580.845	534.934	6343.07	540.844	3.55234	0	0	CSS0027429	Chr9	25047983	25055593	+	3653	protein_coding	- && - && PF03126:Plus-3 domain	-
CSS0023968	995.394	902.145	892.054	9418.6	9483.96	9414.64	929.864	9439.06	-3.343	0	0	CSS0023968	Chr8	126229044	126232755	-	1936	protein_coding	- && sp|Q41144|STC_RICCO Sugar carrier protein C OS=Ricinus communis OX=3988 GN=STC PE=2 SV=1 && PF00083:Sugar (and other) transporter	Sugar_tr
CSS0048035	4885.66	4931.57	4951.48	848.878	894.12	861.566	4922.9	868.188	2.50356	0	0	CSS0048035	Chr10	5959986	5963009	-	1000	protein_coding	- && sp|Q9FYF7|Y1736_ARATH REF/SRPP-like protein At1g67360 OS=Arabidopsis thaliana OX=3702 GN=At1g67360 PE=2 SV=1 && PF05755:Rubber elongation factor protein (REF)	-
CSS0047427	798.723	858.806	832.456	8455.68	8447.01	8045.52	829.995	8316.07	-3.32596	0	0	CSS0047427	Chr6	124630812	124636452	+	2027	protein_coding	- && - && PF14365:Neprosin activation peptide|PF03080:Neprosin	-
CSS0035701	2282.78	2274.18	2263.78	11047.4	11142.7	11296.2	2273.58	11162.1	-2.29557	0	0	CSS0035701	Chr15	9357226	9362227	+	2154	protein_coding	- && sp|Q9M5P5|RSH3L_ARATH Probable GTP diphosphokinase RSH3, chloroplastic OS=Arabidopsis thaliana OX=3702 GN=RSH3 PE=2 SV=1 && PF04607:Region found in RelA / SpoT proteins|PF13328:HD domain	-
CSS0007188	641.186	659.216	630.59	4248.99	3831.67	4097.57	643.664	4059.41	-2.65785	0	0	CSS0007188	Chr9	86465563	86469984	+	1954	protein_coding	- && sp|A0A067XH53|AROG1_PETHY Phospho-2-dehydro-3-deoxyheptonate aldolase 1, chloroplastic OS=Petunia hybrida OX=4102 GN=DAHP1 PE=2 SV=1 && PF01474:Class-II DAHP synthetase family	-
CSS0024973	2102.17	2056.34	1956.17	6887.6	7093.93	7280.77	2038.23	7087.43	-1.79831	0	0	CSS0024973	Chr2	55296517	55303066	+	1798	protein_coding	- && sp|P50218|IDHC_TOBAC Isocitrate dehydrogenase [NADP] OS=Nicotiana tabacum OX=4097 PE=2 SV=1 && PF00180:Isocitrate/isopropylmalate dehydrogenase	-
CSS0029123	1046.57	1054.97	1141.02	4538.69	4409.66	4453.54	1080.85	4467.3	-2.0462	0	0	CSS0029123	Chr1	45698887	45699827	-	738	protein_coding	- && sp|I1JIC4|ERD15_SOYBN Protein EARLY RESPONSIVE TO DEHYDRATION 15 OS=Glycine max OX=3847 GN=ERD15 PE=2 SV=1 && -	-
CSS0008561	483.649	466.469	491.207	3663.15	3548.87	3670.21	480.442	3627.41	-2.91524	0	0	CSS0008561	Chr5	193525238	193527410	+	1751	protein_coding	- && sp|A7Q0V4|METK5_VITVI S-adenosylmethionine synthase 5 OS=Vitis vinifera OX=29760 GN=METK5 PE=3 SV=1 && PF02773:S-adenosylmethionine synthetase, C-terminal domain|PF00438:S-adenosylmethionine synthetase, N-terminal domain|PF02772:S-adenosylmethionine synthetase, central domain	-
CSS0038038	392.338	372.947	388.351	3669.58	3662.18	3736.71	384.545	3689.49	-3.26089	0	0	CSS0038038	Chr2	69489946	69494313	+	1951	protein_coding	- && sp|Q9LV33|BGL44_ARATH Beta-glucosidase 44 OS=Arabidopsis thaliana OX=3702 GN=BGLU44 PE=2 SV=1 && PF00232:Glycosyl hydrolase family 1	Glyco_hydro_1
CSS0049553	1438.91	1429.06	1499.57	9502.29	9088.79	9041.06	1455.85	9210.72	-2.66074	0	0	CSS0049553	Chr2	198362363	198370337	-	2682	protein_coding	- && sp|Q05001|NCPR_CATRO NADPH--cytochrome P450 reductase OS=Catharanthus roseus OX=4058 GN=CPR PE=2 SV=1 && PF00667:FAD binding domain|PF00175:Oxidoreductase NAD-binding domain|PF00258:Flavodoxin	NAD_binding_1
CSS0010485	6502.17	6472.41	6369.34	1308.73	1225.49	1188.2	6447.97	1240.8	2.37691	0	0	CSS0010485	Chr8	117482933	117484431	+	1499	protein_coding	- && - && PF04520:Senescence regulator	-
CSS0012064	8014.33	7941.39	8206.32	141.633	145.687	96.8162	8054.01	128.046	5.97292	0	0	CSS0012064	Chr3	34804310	34816489	+	2685	protein_coding	- && sp|A8MQN2|LNK1_ARATH Protein LNK1 OS=Arabidopsis thaliana OX=3702 GN=LNK1 PE=1 SV=1 && -	-
CSS0033331	6266.37	6277.38	6318.4	1850.43	1844.42	1914.81	6287.38	1869.89	1.74972	0	0	CSS0033331	Chr6	10758496	10770917	+	1251	protein_coding	- && sp|P27141|CAHC_TOBAC Carbonic anhydrase, chloroplastic OS=Nicotiana tabacum OX=4097 PE=2 SV=1 && PF00484:Carbonic anhydrase	-
CSS0045376	351.197	344.435	359.513	5013.26	5309.49	5266.21	351.715	5196.32	-3.88376	0	0	CSS0045376	Chr11	45877663	45879390	+	1144	protein_coding	- && - && -	-
CSS0049176	68.2327	86.6789	95.1653	12396.6	13053.8	13257.9	83.3589	12902.8	-7.27343	0	0	CSS0049176	Chr4	86401210	86404739	-	675	protein_coding	- && sp|P27141|CAHC_TOBAC Carbonic anhydrase, chloroplastic OS=Nicotiana tabacum OX=4097 PE=2 SV=1 && PF00484:Carbonic anhydrase	-
CSS0028496	438.495	490.42	498.897	8600.07	8065.17	8064.1	475.937	8243.11	-4.11498	0	0	CSS0028496	Chr4	112852743	112856097	+	1172	protein_coding	- && sp|Q43095|CAMT_POPTM Caffeoyl-CoA O-methyltransferase OS=Populus tremuloides OX=3693 PE=2 SV=1 && PF01596:O-methyltransferase	-
CSS0049616	4572.59	4619.07	4570.82	177.501	163.779	172.118	4587.49	171.133	4.74401	0	0	CSS0049616	Chr4	65287201	65292229	-	2106	protein_coding	- && sp|Q9MBA1|CAO_ARATH Chlorophyllide a oxygenase, chloroplastic OS=Arabidopsis thaliana OX=3702 GN=CAO PE=1 SV=1 && PF00355:Rieske [2Fe-2S] domain|PF08417:Pheophorbide a oxygenase	-
CSS0034802	481.642	482.437	424.879	6792.87	6642.58	6565.9	462.986	6667.11	-3.85087	0	0	CSS0034802	Chr7	125120506	125126706	+	2635	protein_coding	- && sp|P45726|PALY_CAMSI Phenylalanine ammonia-lyase OS=Camellia sinensis OX=4442 GN=PAL PE=2 SV=1 && PF00221:Aromatic amino acid lyase	-
CSS0027323	3548.1	3704.38	3736.44	179.341	150.448	200.478	3662.97	176.756	4.37419	0	0	CSS0027323	Chr4	178606346	178607463	+	369	protein_coding	- && sp|P50165|TRNH_DATST Tropinone reductase homolog OS=Datura stramonium OX=4076 PE=2 SV=1 && PF00106:short chain dehydrogenase	adh_short
CSS0048313	1916.53	1908.08	1911.96	7587.48	7333.88	7543.84	1912.19	7488.4	-1.9694	0	0	CSS0048313	Chr9	121972536	121976071	-	2043	protein_coding	- && sp|Q9M9Z2|TPP2_ARATH Probable thylakoidal processing peptidase 2, chloroplastic OS=Arabidopsis thaliana OX=3702 GN=TPP2 PE=2 SV=1 && PF10502:Signal peptidase, peptidase S26	-
CSS0034074	3790.93	3715.79	3806.61	583.087	644.643	662.066	3771.11	629.932	2.58275	0	0	CSS0034074	Chr7	43058969	43078723	-	891	protein_coding	- && sp|Q67ZU1|LIP2_ARATH Triacylglycerol lipase 2 OS=Arabidopsis thaliana OX=3702 GN=LIP2 PE=2 SV=1 && -	-
CSS0020515	4907.73	4818.66	4934.17	1232.39	1329.28	1323.15	4886.86	1294.94	1.91658	0	0	CSS0020515	Contig370	192930	196524	+	1569	protein_coding	- && sp|Q94BS2|MET1_ARATH Protein MET1, chloroplastic OS=Arabidopsis thaliana OX=3702 GN=MET1 PE=1 SV=1 && -	-
CSS0047548	5790.74	5979.7	6051.16	1626.94	1673.98	1573.51	5940.54	1624.81	1.87016	0	0	CSS0047548	Chr1	144924018	144926289	+	1404	protein_coding	- && sp|G3FIN9|UGTK5_MANES Linamarin synthase 2 OS=Manihot esculenta OX=3983 GN=UGT85K5 PE=1 SV=1 && PF00201:UDP-glucoronosyl and UDP-glucosyl transferase	UDPGT
CSS0016694	1059.61	1159.9	1159.29	6011.13	5653.24	5809.95	1126.27	5824.77	-2.37123	0	0	CSS0016694	Chr3	166979383	166990286	+	4018	protein_coding	- && sp|Q0WV12|ANL2_ARATH Homeobox-leucine zipper protein ANTHOCYANINLESS 2 OS=Arabidopsis thaliana OX=3702 GN=ANL2 PE=2 SV=1 && -	-
CSS0022810	7984.22	7908.31	8150.57	512.27	497.051	465.5	8014.37	491.607	4.02623	0	0	CSS0022810	Chr9	81100722	81101862	-	514	protein_coding	- && sp|Q9SGZ8|FLZ6_ARATH FCS-Like Zinc finger 6 OS=Arabidopsis thaliana OX=3702 GN=FLZ6 PE=1 SV=1 && PF04570:zinc-finger of the FCS-type, C2-C2	-
CSS0008624	193.66	183.622	187.447	5518.17	5101.91	5350.31	188.243	5323.47	-4.82067	0	0	CSS0008624	Chr6	54653549	54655172	-	1528	protein_coding	- && - && -	-
CSS0014190	8911.39	8089.65	9701.09	1391.5	1265.48	1354.45	8900.71	1337.14	2.73505	0	0	CSS0014190	Chr6	95523688	95526702	-	1208	protein_coding	- && sp|B2X050|MNR1_CAPAN (+)-neomenthol dehydrogenase OS=Capsicum annuum OX=4072 GN=MNR1 PE=1 SV=1 && PF13561:Enoyl-(Acyl carrier protein) reductase|PF00106:short chain dehydrogenase	adh_short
CSS0005439	4315.72	4192.52	4273.79	328.331	325.654	381.397	4260.67	345.127	3.62733	0	0	CSS0005439	Contig773	110327	117675	-	3141	protein_coding	- && sp|O49954|GCSP_SOLTU Glycine dehydrogenase (decarboxylating), mitochondrial OS=Solanum tuberosum OX=4113 GN=GDCSP PE=2 SV=1 && PF02347:Glycine cleavage system P-protein	-
CSS0009842	64.219	49.042	61.521	2404.08	2404.32	2442.9	58.2607	2417.1	-5.36539	0	0	CSS0009842	Chr10	122364424	122372499	+	1285	protein_coding	- && sp|A0A078ISJ6|TC32B_BRANA Short-chain dehydrogenase TIC 32 B, chloroplastic OS=Brassica napus OX=3708 GN=TIC32B PE=3 SV=1 && PF00106:short chain dehydrogenase	adh_short
CSS0008952	8103.63	7795.4	7723.77	1388.74	1333.09	1284.04	7874.27	1335.29	2.55954	0	0	CSS0008952	Chr14	107585347	107587261	-	1241	protein_coding	- && - && -	-
CSS0006800	6507.19	6561.37	6461.62	2060.12	1879.65	2027.27	6510.06	1989.01	1.71042	0	0	CSS0006800	Chr1	170642219	170645357	-	717	protein_coding	- && sp|Q39255|SKP1A_ARATH SKP1-like protein 1A OS=Arabidopsis thaliana OX=3702 GN=SKP1A PE=1 SV=1 && PF03931:Skp1 family, tetramerisation domain|PF01466:Skp1 family, dimerisation domain	Skp1_POZ
CSS0045779	6940.67	6938.88	6768.27	2210.03	2180.55	2154.4	6882.6	2181.66	1.65726	0	0	CSS0045779	Chr6	128308708	128311338	+	558	protein_coding	- && sp|A2YEZ6|SAP8_ORYSI Zinc finger A20 and AN1 domain-containing stress-associated protein 8 OS=Oryza sativa subsp. indica OX=39946 GN=SAP8 PE=2 SV=2 && PF01428:AN1-like Zinc finger|PF01754:A20-like zinc finger	zf-A20
CSS0038895	240.821	191.606	174.95	5016.94	4987.65	4966.96	202.459	4990.52	-4.62322	0	0	CSS0038895	Chr1	6352528	6354483	+	1385	protein_coding	- && sp|Q9SPK4|PPCK1_ARATH Phosphoenolpyruvate carboxylase kinase 1 OS=Arabidopsis thaliana OX=3702 GN=PPCK1 PE=1 SV=1 && PF00069:Protein kinase domain	Pkinase
CSS0005808	480.639	481.296	487.361	3141.68	3127.99	3161.68	483.099	3143.78	-2.70187	0	0	CSS0005808	Chr13	111683140	111690916	-	1956	protein_coding	- && sp|O48651|SQE1_PANGI Squalene monooxygenase SE1 OS=Panax ginseng OX=4054 GN=SQE1 PE=2 SV=1 && PF08491:Squalene epoxidase	-
CSS0014092	6039.59	6164.47	5932.93	478.241	478.959	498.75	6045.66	485.317	3.63907	0	0	CSS0014092	Chr2	128060662	128067337	+	4323	protein_coding	- && sp|Q8LGU1|AB8C_ARATH ABC transporter C family member 8 OS=Arabidopsis thaliana OX=3702 GN=ABCC8 PE=2 SV=3 && PF00664:ABC transporter transmembrane region|PF00005:ABC transporter	ABC_tran
CSS0004634	1361.64	1299.04	1362.11	5018.78	4914.33	5051.06	1340.93	4994.72	-1.89624	0	0	CSS0004634	Chr13	50776316	50786704	-	2631	protein_coding	- && sp|Q9ASS7|CAAT2_ARATH Cationic amino acid transporter 2, vacuolar OS=Arabidopsis thaliana OX=3702 GN=CAT2 PE=1 SV=1 && PF13520:Amino acid permease|PF13906:C-terminus of AA_permease	-
CSS0010451	5770.68	6231.76	5877.18	1751.1	1710.16	1795.5	5959.87	1752.25	1.76577	0	0	CSS0010451	Chr2	211259644	211282350	+	2560	protein_coding	- && sp|Q9C9P4|KASC2_ARATH 3-oxoacyl-[acyl-carrier-protein] synthase II, chloroplastic OS=Arabidopsis thaliana OX=3702 GN=KAS2 PE=1 SV=1 && PF02801:Beta-ketoacyl synthase, C-terminal domain|PF00109:Beta-ketoacyl synthase, N-terminal domain	ketoacyl-synt
CSS0015076	11856.4	11761	11462.1	1051.21	943.635	966.206	11693.2	987.017	3.56564	0	0	CSS0015076	Chr10	143306185	143325996	-	2576	protein_coding	- && sp|Q9SX20|PTR18_ARATH Protein NRT1/ PTR FAMILY 3.1 OS=Arabidopsis thaliana OX=3702 GN=NPF3.1 PE=2 SV=1 && PF00854:POT family	-
CSS0015033	74.2532	92.3815	93.2427	3666.82	3393.66	3665.32	86.6258	3575.27	-5.3691	0	0	CSS0015033	Chr15	85691237	85696468	+	2559	protein_coding	- && sp|Q6NPR6|TORL3_ARATH TORTIFOLIA1-like protein 3 OS=Arabidopsis thaliana OX=3702 GN=TOR1L3 PE=2 SV=1 && -	-
CSS0014797	1240.23	1220.35	1213.12	4522.14	4604.86	4355.75	1224.56	4494.25	-1.87587	0	0	CSS0014797	Chr5	184702402	184712207	-	2621	protein_coding	- && sp|Q56XP4|NHX2_ARATH Sodium/hydrogen exchanger 2 OS=Arabidopsis thaliana OX=3702 GN=NHX2 PE=2 SV=2 && PF00999:Sodium/hydrogen exchanger family	Na_H_Exchanger
CSS0015656	6750.02	6675.42	6418.37	447.891	476.102	469.412	6614.6	464.469	3.83233	0	0	CSS0015656	Chr4	135996833	135997563	-	731	protein_coding	- && sp|Q39065|COPT1_ARATH Copper transporter 1 OS=Arabidopsis thaliana OX=3702 GN=COPT1 PE=2 SV=2 && PF04145:Ctr copper transporter family	-
CSS0015651	3692.59	3413.55	3487.47	492.957	398.022	414.647	3531.2	435.208	3.01929	0	0	CSS0015651	Chr12	157257097	157258916	+	1820	protein_coding	- && sp|Q9FLE8|Y5986_ARATH Uncharacterized protein At5g39865 OS=Arabidopsis thaliana OX=3702 GN=At5g39865 PE=2 SV=1 && PF00462:Glutaredoxin	-
CSS0041008	172.588	125.456	124.003	3562.9	3607.9	3673.15	140.683	3614.65	-4.68024	0	0	CSS0041008	Contig644	304644	307768	+	793	protein_coding	- && sp|P33050|PSC13_MAIZE Pollen-specific protein C13 OS=Zea mays OX=4577 GN=MGS1 PE=2 SV=1 && PF01190:Pollen proteins Ole e I like	-
CSS0006890	5188.69	5370.67	5680.12	34.0287	23.8051	28.3603	5413.16	28.7314	7.55473	0	0	CSS0006890	Chr1	56713968	56717189	-	1664	protein_coding	- && sp|Q8RWS6|FRO6_ARATH Ferric reduction oxidase 6 OS=Arabidopsis thaliana OX=3702 GN=FRO6 PE=2 SV=1 && PF08030:Ferric reductase NAD binding domain	-
CSS0042533	3159.77	3240.19	3175.06	501.234	501.812	538.845	3191.68	513.964	2.63494	0	0	CSS0042533	Chr10	124099300	124101445	-	1178	protein_coding	- && - && -	-
CSS0032175	682.327	691.15	761.322	4500.99	4292.54	4423.23	711.6	4405.58	-2.6287	0	0	CSS0032175	Contig475	629491	637296	+	4231	protein_coding	- && sp|Q94IB8|LCB1_ARATH Long chain base biosynthesis protein 1 OS=Arabidopsis thaliana OX=3702 GN=LCB1 PE=1 SV=1 && -	-
CSS0011529	4625.77	4552.92	4552.55	1328.96	1364.51	1340.76	4577.08	1344.74	1.7672	0	0	CSS0011529	Chr6	127168951	127233779	+	6273	protein_coding	- && sp|Q9SL03|CALS2_ARATH Callose synthase 2 OS=Arabidopsis thaliana OX=3702 GN=CALS2 PE=2 SV=3 && PF04652:Vta1 like|PF02364:1,3-beta-glucan synthase component|PF14288:1,3-beta-glucan synthase subunit FKS1, domain-1	DUF605
novel.7840	5059.25	5080.98	5117.78	1261.82	1382.6	1310.44	5086	1318.29	1.94813	0	0	-	Chr9	51682907	51690303	+	1280	-	- && sp|Q55909|Y305_SYNY3 TVP38/TMEM64 family membrane protein slr0305 OS=Synechocystis sp. (strain PCC 6803 / Kazusa) OX=1111708 GN=slr0305 PE=3 SV=1 && -	-
CSS0048795	454.55	448.221	410.46	4043.9	3708.84	3999.78	437.744	3917.5	-3.1633	0	0	CSS0048795	Chr4	8223606	8228027	-	1884	protein_coding	- && sp|P83332|TLP1_PRUPE Thaumatin-like protein 1 OS=Prunus persica OX=3760 PE=2 SV=1 && PF00314:Thaumatin family	Thaumatin
CSS0023090	5771.68	5593.07	5741.64	1111.91	1118.84	1069.87	5702.13	1100.21	2.37368	0	0	CSS0023090	Chr4	132420066	132447946	-	2704	protein_coding	- && sp|Q9MB58|F26_ARATH 6-phosphofructo-2-kinase/fructose-2,6-bisphosphatase OS=Arabidopsis thaliana OX=3702 GN=FKFBP PE=1 SV=1 && PF00300:Histidine phosphatase superfamily (branch 1)|PF01591:6-phosphofructo-2-kinase	-
CSS0044860	3146.73	3083.94	3096.24	319.134	366.599	390.198	3108.97	358.644	3.11744	0	0	CSS0044860	Chr10	30439966	30458700	-	3608	protein_coding	- && sp|Q8GVE8|CAPP4_ARATH Phosphoenolpyruvate carboxylase 4 OS=Arabidopsis thaliana OX=3702 GN=PPC4 PE=2 SV=1 && PF00311:Phosphoenolpyruvate carboxylase	-
CSS0012938	5595.08	5505.25	5339.83	432.257	410.4	425.404	5480.05	422.687	3.69624	0	0	CSS0012938	Chr7	26647975	26689027	+	3376	protein_coding	- && sp|Q9LJR3|SPA3_ARATH Protein SPA1-RELATED 3 OS=Arabidopsis thaliana OX=3702 GN=SPA3 PE=1 SV=1 && -	-
CSS0011926	2491.5	2283.31	2433.92	11546.8	11424.6	11317.7	2402.91	11429.7	-2.24872	0	0	CSS0011926	Contig1032	136879	141580	+	1383	protein_coding	- && sp|Q94EG9|ZIP11_ARATH Zinc transporter 11 OS=Arabidopsis thaliana OX=3702 GN=ZIP11 PE=2 SV=1 && PF02535:ZIP Zinc transporter	-
CSS0021650	588.005	598.769	551.766	6811.26	6635.92	6792.78	579.513	6746.65	-3.54317	0	0	CSS0021650	Chr15	19150389	19162446	-	4462	protein_coding	- && sp|Q9XIE2|AB36G_ARATH ABC transporter G family member 36 OS=Arabidopsis thaliana OX=3702 GN=ABCG36 PE=1 SV=1 && PF00005:ABC transporter|PF08370:Plant PDR ABC transporter associated|PF01061:ABC-2 type transporter|PF14510:ABC-transporter N-terminal	ABC2_membrane
CSS0009541	4768.26	4824.37	4833.24	998.789	996.006	1074.76	4808.62	1023.18	2.23299	0	0	CSS0009541	Chr4	61289410	61291945	+	2536	protein_coding	- && - && PF07676:WD40-like Beta Propeller Repeat	PD40
CSS0040011	4579.62	4758.22	4389.14	976.716	1099.8	1060.09	4575.66	1045.53	2.12979	0	0	CSS0040011	Chr10	124070478	124075054	-	1488	protein_coding	- && sp|O80934|Y2766_ARATH Uncharacterized protein At2g37660, chloroplastic OS=Arabidopsis thaliana OX=3702 GN=At2g37660 PE=1 SV=2 && PF13460:NAD(P)H-binding	-
CSS0009924	204.698	216.697	261.464	4523.98	4545.83	4666.73	227.62	4578.85	-4.32592	0	0	CSS0009924	Chr4	30775660	30780412	-	1974	protein_coding	- && sp|P27608|AROF_TOBAC Phospho-2-dehydro-3-deoxyheptonate aldolase 1, chloroplastic OS=Nicotiana tabacum OX=4097 GN=DHAPS-1 PE=2 SV=1 && PF01474:Class-II DAHP synthetase family	-
CSS0037627	783.672	826.871	819.959	4101.84	3883.09	4120.07	810.168	4035	-2.31674	0	0	CSS0037627	Chr5	46601254	46604975	+	3166	protein_coding	- && sp|Q9SYM5|RHM1_ARATH Trifunctional UDP-glucose 4,6-dehydratase/UDP-4-keto-6-deoxy-D-glucose 3,5-epimerase/UDP-4-keto-L-rhamnose-reductase RHM1 OS=Arabidopsis thaliana OX=3702 GN=RHM1 PE=1 SV=1 && PF16363:GDP-mannose 4,6 dehydratase|PF04321:RmlD substrate binding domain	-
CSS0046063	380.297	353.559	344.133	4134.95	3825.96	3981.2	359.329	3980.7	-3.46966	0	0	CSS0046063	Chr10	73732720	73733852	+	1133	protein_coding	- && sp|Q9SRN0|NHL1_ARATH NDR1/HIN1-like protein 1 OS=Arabidopsis thaliana OX=3702 GN=NHL1 PE=2 SV=1 && PF03168:Late embryogenesis abundant protein	-
CSS0033750	176.602	189.325	193.214	5208.23	5528.5	5462.78	186.38	5399.84	-4.85665	0	0	CSS0033750	Chr10	14418217	14425094	-	1648	protein_coding	- && sp|Q9SGY2|ACLA1_ARATH ATP-citrate synthase alpha chain protein 1 OS=Arabidopsis thaliana OX=3702 GN=ACLA-1 PE=1 SV=1 && PF16114:ATP citrate lyase citrate-binding|PF08442:ATP-grasp domain	-
CSS0003562	438.495	473.312	428.724	3095.69	2930.89	2922.09	446.844	2982.89	-2.74131	0	0	CSS0003562	Chr10	143198486	143202344	-	1737	protein_coding	- && sp|O48922|C98A2_SOYBN Cytochrome P450 98A2 OS=Glycine max OX=3847 GN=CYP98A2 PE=2 SV=1 && PF00067:Cytochrome P450	p450
CSS0021714	63.2155	87.8194	60.5597	5673.6	5332.35	5574.26	70.5316	5526.74	-6.30812	0	0	CSS0021714	Chr7	48906670	48908515	+	1158	protein_coding	- && sp|Q8LDW9|XTH9_ARATH Xyloglucan endotransglucosylase/hydrolase protein 9 OS=Arabidopsis thaliana OX=3702 GN=XTH9 PE=2 SV=2 && PF00722:Glycosyl hydrolases family 16	-
CSS0033563	4392.98	4453.7	4215.15	104.845	79.033	83.125	4353.94	89.0011	5.60885	0	0	CSS0033563	Chr9	12874641	12903734	-	3493	protein_coding	- && sp|Q42910|PPDK_MESCR Pyruvate, phosphate dikinase, chloroplastic OS=Mesembryanthemum crystallinum OX=3544 GN=PPD PE=2 SV=1 && PF02896:PEP-utilising enzyme, TIM barrel domain|PF00391:PEP-utilising enzyme, mobile domain|PF01326:Pyruvate phosphate dikinase, PEP/pyruvate binding domain	-
CSS0005757	4159.18	4056.8	4378.56	306.258	374.216	355.97	4198.18	345.482	3.60469	0	0	CSS0005757	Chr10	7385883	7388223	-	1417	protein_coding	- && - && -	-
CSS0015756	1457.97	1398.27	1420.75	5148.45	5079.06	5091.16	1425.66	5106.22	-1.84019	0	0	CSS0015756	Chr7	36654147	36660398	-	3303	protein_coding	- && sp|Q9SHI2|Y1723_ARATH Leucine-rich repeat receptor-like serine/threonine-protein kinase At1g17230 OS=Arabidopsis thaliana OX=3702 GN=At1g17230 PE=1 SV=2 && PF08263:Leucine rich repeat N-terminal domain|PF13855:Leucine rich repeat|PF00069:Protein kinase domain	Pkinase
CSS0043232	431.471	432.254	451.795	8811.6	8601.27	8502.22	438.507	8638.36	-4.29906	0	0	CSS0043232	Chr9	62897913	62900546	-	1361	protein_coding	- && sp|Q39013|NAC2_ARATH NAC domain-containing protein 2 OS=Arabidopsis thaliana OX=3702 GN=NAC002 PE=1 SV=2 && PF02365:No apical meristem (NAM) protein	NAM
CSS0046696	287.982	260.037	293.186	3037.75	3002.3	2868.3	280.402	2969.45	-3.4014	0	0	CSS0046696	Chr4	183501519	183507578	+	1887	protein_coding	- && sp|Q9FEL7|LAX2_MEDTR Auxin transporter-like protein 2 OS=Medicago truncatula OX=3880 GN=LAX2 PE=2 SV=1 && PF01490:Transmembrane amino acid transporter protein	Aa_trans
CSS0028633	280.958	291.971	269.154	3286.07	2972.78	3152.88	280.694	3137.25	-3.48452	0	0	CSS0028633	Contig755	92005	99942	-	1907	protein_coding	- && - && -	-
CSS0016695	257.879	274.863	262.425	4283.94	4570.58	4495.59	265.056	4450.04	-4.07109	0	0	CSS0016695	Chr9	141467255	141472007	-	1550	protein_coding	- && sp|O29891|Y356_ARCFU Uncharacterized sugar kinase AF_0356 OS=Archaeoglobus fulgidus (strain ATCC 49558 / VC-16 / DSM 4304 / JCM 9628 / NBRC 100126) OX=224325 GN=AF_0356 PE=3 SV=1 && PF00294:pfkB family carbohydrate kinase	PfkB
CSS0016385	6270.38	6345.81	6277.06	160.027	151.401	153.537	6297.75	154.988	5.34398	0	0	CSS0016385	Chr4	145626154	145629379	-	2324	protein_coding	- && sp|P09189|HSP7C_PETHY Heat shock cognate 70 kDa protein OS=Petunia hybrida OX=4102 GN=HSP70 PE=2 SV=1 && PF00012:Hsp70 protein	HSP70
CSS0039082	7818.66	7844.44	7601.69	2137.37	2043.43	2111.37	7754.93	2097.39	1.88627	0	0	CSS0039082	Chr6	153855517	153868010	-	3258	protein_coding	- && sp|Q8GZ99|HPCA1_ARATH Leucine-rich repeat receptor protein kinase HPCA1 OS=Arabidopsis thaliana OX=3702 GN=HPCA1 PE=1 SV=1 && PF07714:Protein tyrosine kinase	Pkinase_Tyr
CSS0001992	1244.24	1208.94	1258.3	5618.42	5437.09	5584.04	1237.16	5546.52	-2.16379	0	0	CSS0001992	Chr7	144212271	144215414	+	2721	protein_coding	- && sp|Q9XEE6|C3H29_ARATH Zinc finger CCCH domain-containing protein 29 OS=Arabidopsis thaliana OX=3702 GN=At2g40140 PE=1 SV=1 && PF12796:Ankyrin repeats (3 copies)	-
CSS0013271	6028.56	6537.41	6253.03	335.689	320.893	289.471	6273	315.351	4.31242	0	0	CSS0013271	Chr9	18916245	18917134	-	727	protein_coding	- && sp|Q9SL05|PGR5_ARATH Protein PROTON GRADIENT REGULATION 5, chloroplastic OS=Arabidopsis thaliana OX=3702 GN=PGR5 PE=1 SV=1 && -	-
CSS0013259	6045.61	5950.05	5817.58	1801.68	1848.23	1721.18	5937.75	1790.36	1.72938	0	0	CSS0013259	Contig852	422451	433921	+	561	protein_coding	- && sp|Q680P8|RS29_ARATH 40S ribosomal protein S29 OS=Arabidopsis thaliana OX=3702 GN=RPS29A PE=3 SV=2 && PF00253:Ribosomal protein S14p/S29e	Ribosomal_S14
CSS0040430	876.99	826.871	864.177	6738.61	7137.73	7171.24	856.013	7015.86	-3.03363	0	0	CSS0040430	Contig1162	101271	108560	+	1620	protein_coding	- && sp|O05413|NMO_BACSU Probable nitronate monooxygenase OS=Bacillus subtilis (strain 168) OX=224308 GN=yrpB PE=3 SV=1 && PF03060:Nitronate monooxygenase	NPD
CSS0029166	156.534	161.953	178.795	3333.89	3255.59	3223.29	165.761	3270.93	-4.3003	0	0	CSS0029166	Chr8	140470227	140471666	-	824	protein_coding	- && sp|Q08IT1|DADIS_PANGI Dammarenediol II synthase OS=Panax ginseng OX=4054 GN=DDS PE=1 SV=1 && PF13249:Squalene-hopene cyclase N-terminal domain	-
CSS0036940	2881.83	2768.02	2933.78	99.3271	95.2205	111.485	2861.21	102.011	4.81144	0	0	CSS0036940	Chr1	180671543	180678269	+	732	protein_coding	- && sp|Q94AX2|PTST_ARATH Protein PTST, chloroplastic OS=Arabidopsis thaliana OX=3702 GN=PTST PE=1 SV=1 && PF16561:Glycogen recognition site of AMP-activated protein kinase	-
CSS0014004	226.773	205.292	246.084	3531.63	3574.58	3519.61	226.05	3541.94	-3.96462	0	0	CSS0014004	Chr4	10476162	10480202	+	1529	protein_coding	- && sp|Q94AP3|WAT1_ARATH Protein WALLS ARE THIN 1 OS=Arabidopsis thaliana OX=3702 GN=WAT1 PE=1 SV=1 && PF00892:EamA-like transporter family	DUF6
CSS0025876	6153.98	6190.7	6170.36	1974.59	2025.34	1981.31	6171.68	1993.74	1.63018	0	0	CSS0025876	Chr5	11056018	11059776	+	1026	protein_coding	- && sp|Q9M4Y3|RR10_MESCR 30S ribosomal protein S10, chloroplastic OS=Mesembryanthemum crystallinum OX=3544 GN=RPS10 PE=2 SV=1 && PF00338:Ribosomal protein S10p/S20e	Ribosomal_S10
CSS0019514	4875.62	4810.68	4717.89	1437.48	1400.69	1434.64	4801.4	1424.27	1.75313	0	0	CSS0019514	Chr11	14976489	14992939	-	1029	protein_coding	- && sp|Q94CJ5|RER4_ARATH Protein RETICULATA-RELATED 4, chloroplastic OS=Arabidopsis thaliana OX=3702 GN=RER4 PE=2 SV=1 && PF11891:Protein RETICULATA-related	-
CSS0048749	4161.19	4251.83	4193.04	957.402	953.157	939.801	4202.02	950.12	2.14465	0	0	CSS0048749	Chr2	8020752	8033028	-	752	protein_coding	- && sp|O49856|FTRC_SOYBN Ferredoxin-thioredoxin reductase catalytic chain, chloroplastic OS=Glycine max OX=3847 GN=FTRC PE=2 SV=1 && PF02943:Ferredoxin thioredoxin reductase catalytic beta chain	-
CSS0031666	1240.23	1291.06	1282.33	5815.23	5456.13	5173.31	1271.21	5481.56	-2.10884	0	0	CSS0031666	Chr3	125049627	125050495	+	869	protein_coding	- && sp|Q9LHJ8|SAP5_ARATH Zinc finger A20 and AN1 domain-containing stress-associated protein 5 OS=Arabidopsis thaliana OX=3702 GN=SAP5 PE=2 SV=1 && PF01428:AN1-like Zinc finger|PF01754:A20-like zinc finger	zf-A20
CSS0034452	2331.95	2384.81	2485.83	114.042	104.743	106.596	2400.86	108.46	4.46765	0	0	CSS0034452	Chr1	203854822	203855901	+	1080	protein_coding	- && sp|Q96471|DCAM_IPONI S-adenosylmethionine decarboxylase proenzyme OS=Ipomoea nil OX=35883 GN=SAMDC PE=3 SV=1 && PF01536:Adenosylmethionine decarboxylase	SAM_decarbox
CSS0006638	303.033	276.004	314.334	2733.33	2566.19	2605.23	297.79	2634.92	-3.14222	0	0	CSS0006638	Chr12	148766960	148770897	+	1263	protein_coding	- && sp|Q08733|PIP13_ARATH Aquaporin PIP1-3 OS=Arabidopsis thaliana OX=3702 GN=PIP1-3 PE=1 SV=1 && PF00230:Major intrinsic protein	-
CSS0040118	8486.94	8700.97	8149.61	276.828	291.375	266	8445.84	278.068	4.9241	0	0	CSS0040118	Chr5	24803760	24808240	-	1585	protein_coding	- && - && PF04117:Mpv17 / PMP22 family	Mpv17_PMP22
CSS0008558	7591.89	7583.26	7492.1	58.8605	71.4154	66.5	7555.75	65.5919	6.84965	0	0	CSS0008558	Contig874	266400	277760	-	1529	protein_coding	- && sp|Q8RWU3|RVE8_ARATH Protein REVEILLE 8 OS=Arabidopsis thaliana OX=3702 GN=RVE8 PE=2 SV=1 && PF00249:Myb-like DNA-binding domain	Myb_DNA-binding
CSS0032412	3984.59	4111.55	4013.28	798.295	781.76	729.544	4036.47	769.866	2.38965	0	0	CSS0032412	Chr6	7311762	7324853	+	1965	protein_coding	- && sp|A0A1B1WAJ0|RAD1_LOTJA GRAS family protein RAD1 OS=Lotus japonicus OX=34305 GN=RAD1 PE=1 SV=1 && PF03514:GRAS domain family	GRAS
CSS0024623	4175.24	4205.07	4037.31	300.74	267.57	323.698	4139.21	297.336	3.79961	0	0	CSS0024623	Chr9	33064732	33076715	+	3577	protein_coding	- && sp|O04933|SPSA2_CRAPL Probable sucrose-phosphate synthase 2 OS=Craterostigma plantagineum OX=4153 GN=SPS2 PE=2 SV=1 && PF00862:Sucrose synthase|PF05116:Sucrose-6F-phosphate phosphohydrolase|PF00534:Glycosyl transferases group 1	Glycos_transf_1
CSS0028235	34.1163	25.0913	19.2253	5346.19	4925.76	5052.04	26.1443	5108	-7.61337	0	0	CSS0028235	Chr6	27263412	27271756	-	1490	protein_coding	- && sp|Q84V83|LAR_DESUN Leucoanthocyanidin reductase OS=Desmodium uncinatum OX=225101 GN=LAR PE=1 SV=1 && PF05368:NmrA-like family	NmrA
CSS0003950	324.105	354.699	361.436	6625.48	6304.55	6389.87	346.747	6439.97	-4.21551	0	0	CSS0003950	Chr13	16508721	16513295	-	2172	protein_coding	- && sp|Q9M682|GMK2_ARATH Guanylate kinase 2 OS=Arabidopsis thaliana OX=3702 GN=GK-2 PE=2 SV=1 && PF00625:Guanylate kinase	-
CSS0023669	5016.1	4875.69	4941.86	1029.14	996.006	1044.44	4944.55	1023.2	2.27297	0	0	CSS0023669	Contig241	690986	696931	+	2508	protein_coding	- && sp|Q2LAJ3|ARF2A_SOLLC Auxin response factor 2A OS=Solanum lycopersicum OX=4081 GN=ARF2A PE=1 SV=1 && PF02362:B3 DNA binding domain|PF02309:AUX/IAA family|PF06507:Auxin response factor	Auxin_resp
CSS0044229	380.297	432.254	390.274	5398.61	5131.43	5322.93	400.941	5284.32	-3.72369	0	0	CSS0044229	Chr9	19340585	19348215	-	2093	protein_coding	- && sp|Q9FNL7|PTR3_ARATH Protein NRT1/ PTR FAMILY 5.2 OS=Arabidopsis thaliana OX=3702 GN=NPF5.2 PE=2 SV=1 && PF00854:POT family	-
CSS0020159	2590.83	2877.51	2881.87	38.6272	24.7573	21.5147	2783.41	28.2997	6.61141	0	0	CSS0020159	Chr12	160010001	160014583	+	1255	protein_coding	- && sp|R4HZ96|D27_MEDTR Beta-carotene isomerase D27, chloroplastic OS=Medicago truncatula OX=3880 GN=D27 PE=1 SV=1 && PF13225:Domain of unknown function (DUF4033)	-
CSS0001442	117.4	112.911	118.236	4452.24	4200.18	4136.69	116.182	4263.04	-5.19583	0	0	CSS0001442	Chr10	110969786	110975776	-	2583	protein_coding	- && sp|P45726|PALY_CAMSI Phenylalanine ammonia-lyase OS=Camellia sinensis OX=4442 GN=PAL PE=2 SV=1 && PF00221:Aromatic amino acid lyase	-
CSS0018801	295.006	281.706	280.689	2892.44	2914.7	2846.79	285.801	2884.64	-3.33502	0	0	CSS0018801	Chr5	26012887	26021159	-	1113	protein_coding	- && sp|P24805|TSJT1_TOBAC Stem-specific protein TSJT1 OS=Nicotiana tabacum OX=4097 GN=TSJT1 PE=2 SV=1 && PF12481:Aluminium induced protein	-
novel.400	1246.25	1327.56	1189.09	5521.85	5667.52	5734.65	1254.3	5641.34	-2.17095	0	0	-	Chr1	55972005	55973861	-	1857	-	- && sp|Q9LY05|EF106_ARATH Ethylene-responsive transcription factor ERF106 OS=Arabidopsis thaliana OX=3702 GN=ERF106 PE=2 SV=1 && PF00847:AP2 domain	AP2
CSS0028207	2847.71	2789.69	2924.17	25.7515	24.7573	25.4265	2853.86	25.3117	6.81698	0	0	CSS0028207	Chr3	98835098	98860263	+	2617	protein_coding	- && sp|F4JCX9|LNK2_ARATH Protein LNK2 OS=Arabidopsis thaliana OX=3702 GN=LNK2 PE=1 SV=1 && -	-
CSS0014722	296.009	350.137	264.348	3403.79	3406.04	3420.84	303.498	3410.22	-3.49714	0	0	CSS0014722	Chr11	68017843	68019746	+	744	protein_coding	- && - && -	-
CSS0000005	2771.45	2716.7	2769.41	138.874	120.93	120.287	2752.52	126.697	4.43971	0	0	CSS0000005	Chr1	188334867	188356961	-	1016	protein_coding	- && sp|Q9FN15|GLD27_ARATH Protein CONSERVED IN THE GREEN LINEAGE AND DIATOMS 27, chloroplastic OS=Arabidopsis thaliana OX=3702 GN=CGLD27 PE=2 SV=1 && PF06799:Conserved in the green lineage and diatoms 27	-
CSS0038569	3774.87	3759.13	3889.28	119.56	92.3639	99.75	3807.76	103.891	5.19343	0	0	CSS0038569	Chr15	107647013	107649143	+	1265	protein_coding	- && sp|Q8RWD0|COL16_ARATH Zinc finger protein CONSTANS-LIKE 16 OS=Arabidopsis thaliana OX=3702 GN=COL16 PE=1 SV=2 && PF00643:B-box zinc finger|PF06203:CCT motif	CCT
CSS0014886	3132.68	3082.8	3135.65	442.373	403.735	472.345	3117.04	439.485	2.82683	0	0	CSS0014886	Chr6	79084725	79089948	+	1386	protein_coding	- && sp|Q9MAM1|CIPK9_ARATH CBL-interacting serine/threonine-protein kinase 9 OS=Arabidopsis thaliana OX=3702 GN=CIPK9 PE=1 SV=2 && PF03822:NAF domain|PF00069:Protein kinase domain	Pkinase
CSS0043101	2936.01	2817.06	2927.05	306.258	359.933	303.162	2893.38	323.118	3.1629	0	0	CSS0043101	Chr5	104318259	104319274	-	672	protein_coding	- && - && -	-
CSS0012119	350.194	326.186	396.041	2663.44	2601.42	2633.59	357.474	2632.82	-2.87672	0	0	CSS0012119	Chr12	144749300	144755743	-	1824	protein_coding	- && sp|P54873|HMCS_ARATH Hydroxymethylglutaryl-CoA synthase OS=Arabidopsis thaliana OX=3702 GN=HMGS PE=1 SV=2 && PF01154:Hydroxymethylglutaryl-coenzyme A synthase N terminal|PF08540:Hydroxymethylglutaryl-coenzyme A synthase C terminal	-
CSS0006663	120.411	98.084	102.855	2130.01	2354.8	2269.8	107.117	2251.54	-4.3904	0	0	CSS0006663	Chr1	146789465	146791192	-	1728	protein_coding	- && - && -	-
CSS0004941	2265.73	2235.4	2443.54	128.757	130.452	134.956	2314.89	131.388	4.13993	0	0	CSS0004941	Chr2	146122646	146127689	+	2401	protein_coding	- && sp|Q43784|SSG1_MANES Granule-bound starch synthase 1, chloroplastic/amyloplastic OS=Manihot esculenta OX=3983 GN=WAXY PE=2 SV=1 && -	-
CSS0015270	5946.28	5605.62	5680.12	560.094	601.793	582.853	5744	581.58	3.30453	0	0	CSS0015270	Chr11	63639234	63681709	+	4215	protein_coding	- && sp|P09189|HSP7C_PETHY Heat shock cognate 70 kDa protein OS=Petunia hybrida OX=4102 GN=HSP70 PE=2 SV=1 && PF00012:Hsp70 protein	HSP70
CSS0020436	3286.21	3341.7	3408.65	509.511	478.007	480.169	3345.52	489.229	2.77323	0	0	CSS0020436	Chr4	3196645	3200220	-	1238	protein_coding	- && sp|Q9S720|PPD3_ARATH PsbP domain-containing protein 3, chloroplastic OS=Arabidopsis thaliana OX=3702 GN=PPD3 PE=1 SV=2 && -	-
CSS0001957	274.937	307.938	284.535	6798.39	6648.29	6612.84	289.137	6686.51	-4.53473	0	0	CSS0001957	Chr2	13627504	13646703	+	3656	protein_coding	- && sp|P04045|PHSL1_SOLTU Alpha-1,4 glucan phosphorylase L-1 isozyme, chloroplastic/amyloplastic OS=Solanum tuberosum OX=4113 PE=1 SV=2 && PF00343:Carbohydrate phosphorylase	-
CSS0023018	115.393	96.9435	114.391	2791.27	2559.53	2736.28	108.909	2695.69	-4.62358	0	0	CSS0023018	Chr1	165716493	165717203	-	711	protein_coding	- && sp|Q6H7J6|YSL14_ORYSJ Probable metal-nicotianamine transporter YSL14 OS=Oryza sativa subsp. japonica OX=39947 GN=YSL14 PE=2 SV=1 && PF03169:OPT oligopeptide transporter protein	OPT
CSS0035213	77.2634	69.5712	74.0174	2935.67	2890.89	2851.68	73.6174	2892.75	-5.29338	0	0	CSS0035213	Chr2	30197149	30202775	-	1365	protein_coding	- && sp|Q43873|PER73_ARATH Peroxidase 73 OS=Arabidopsis thaliana OX=3702 GN=PER73 PE=1 SV=1 && PF00141:Peroxidase	-
CSS0015632	511.745	471.031	502.742	3159.15	3007.06	3167.55	495.173	3111.26	-2.6498	0	0	CSS0015632	Chr1	177288367	177292068	+	2429	protein_coding	- && sp|Q6Z2G9|TLP5_ORYSJ Tubby-like F-box protein 5 OS=Oryza sativa subsp. japonica OX=39947 GN=TULP5 PE=2 SV=1 && PF01167:Tub family|PF00646:F-box domain	Tub
CSS0040361	646.203	617.017	743.058	4659.17	4664.85	4568.94	668.759	4630.99	-2.78856	0	0	CSS0040361	Chr12	20882000	20884727	-	2728	protein_coding	- && sp|Q9FLV4|Y5248_ARATH G-type lectin S-receptor-like serine/threonine-protein kinase At5g24080 OS=Arabidopsis thaliana OX=3702 GN=At5g24080 PE=2 SV=1 && PF00954:S-locus glycoprotein domain|PF00069:Protein kinase domain	Pkinase
CSS0003618	2567.76	2726.96	2749.22	220.727	203.772	217.103	2681.31	213.867	3.64786	0	0	CSS0003618	Chr4	10656360	10658172	-	959	protein_coding	- && - && PF02190:ATP-dependent protease La (LON) substrate-binding domain	-
novel.4771	3993.62	3791.06	3955.61	585.846	597.032	620.992	3913.43	601.29	2.70303	0	0	-	Chr4	15117514	15123226	+	3153	-	- && sp|Q9C9Q4|JAC1_ARATH J domain-containing protein required for chloroplast accumulation response 1 OS=Arabidopsis thaliana OX=3702 GN=JAC1 PE=1 SV=1 && -	-
CSS0016285	474.618	445.94	447.95	3646.59	3549.82	3455.07	456.169	3550.49	-2.95992	0	0	CSS0016285	Chr14	8945041	8946056	+	891	protein_coding	- && - && -	-
CSS0035809	2456.38	2688.19	2582.92	306.258	276.139	271.868	2575.83	284.755	3.17588	0	0	CSS0035809	Chr10	32211366	32221193	+	1689	protein_coding	- && sp|Q9S713|STT7_ARATH Serine/threonine-protein kinase STN7, chloroplastic OS=Arabidopsis thaliana OX=3702 GN=STN7 PE=1 SV=1 && PF00069:Protein kinase domain	Pkinase
CSS0021418	2739.34	2841.02	2678.08	277.748	298.04	290.448	2752.81	288.745	3.2531	0	0	CSS0021418	Contig238	78952	111669	-	2862	protein_coding	- && sp|Q55680|Y005_SYNY3 Uncharacterized protein sll0005 OS=Synechocystis sp. (strain PCC 6803 / Kazusa) OX=1111708 GN=sll0005 PE=3 SV=1 && PF01636:Phosphotransferase enzyme family|PF03109:ABC1 family	ABC1
CSS0043644	4803.38	4952.1	5031.26	94.7286	111.408	132.022	4928.91	112.72	5.45454	0	0	CSS0043644	Chr12	141760261	141764010	+	1993	protein_coding	- && sp|O64637|C76C2_ARATH Cytochrome P450 76C2 OS=Arabidopsis thaliana OX=3702 GN=CYP76C2 PE=2 SV=1 && PF00067:Cytochrome P450	p450
CSS0024116	452.543	448.221	423.918	3445.18	3207.03	3352.38	441.561	3334.86	-2.91796	0	0	CSS0024116	Chr8	159722654	159729862	-	1979	protein_coding	- && sp|I1L153|AAH2_SOYBN Allantoate deiminase 2 OS=Glycine max OX=3847 GN=AAH2 PE=1 SV=1 && PF07687:Peptidase dimerisation domain|PF01546:Peptidase family M20/M25/M40	Peptidase_M20
CSS0032880	2195.49	2351.74	2373.36	56.1014	69.511	83.125	2306.86	69.5791	5.05565	0	0	CSS0032880	Contig967	314132	315772	+	787	protein_coding	- && - && -	-
CSS0033472	462.577	463.048	494.09	3183.98	2989.92	3051.18	473.238	3075.03	-2.69889	0	0	CSS0033472	Chr9	17598955	17608639	-	3307	protein_coding	- && sp|Q9XGW1|AGO10_ARATH Protein argonaute 10 OS=Arabidopsis thaliana OX=3702 GN=AGO10 PE=1 SV=1 && PF16488:Argonaute linker 2 domain|PF08699:Argonaute linker 1 domain|PF02170:PAZ domain|PF16486:N-terminal domain of argonaute|PF16487:Mid domain of argonaute|PF02171:Piwi domain	Piwi
CSS0047761	2693.18	2787.41	2931.86	180.26	155.209	149.625	2804.15	161.698	4.11438	0	0	CSS0047761	Chr9	52794765	52795952	-	900	protein_coding	- && sp|Q9SMS0|NDHT_ARATH NAD(P)H-quinone oxidoreductase subunit T, chloroplastic OS=Arabidopsis thaliana OX=3702 GN=ndhT PE=1 SV=1 && PF00226:DnaJ domain	DnaJ
CSS0048204	4052.82	4158.31	4325.69	660.341	748.433	682.603	4178.94	697.126	2.58403	0	0	CSS0048204	Chr3	106765019	106765600	+	582	protein_coding	- && - && -	-
CSS0026811	6146.96	6139.38	6394.34	409.264	413.257	522.22	6226.89	448.247	3.79812	0	0	CSS0026811	Chr12	132696594	132698246	-	551	protein_coding	- && sp|Q8VZM9|FLZ2_ARATH FCS-Like Zinc finger 2 OS=Arabidopsis thaliana OX=3702 GN=FLZ2 PE=1 SV=1 && PF04570:zinc-finger of the FCS-type, C2-C2	-
CSS0006857	269.92	234.945	317.218	3829.61	3665.99	3704.44	274.028	3733.35	-3.76086	0	0	CSS0006857	Chr1	202519133	202520650	-	1281	protein_coding	- && sp|A2XID3|AOC_ORYSI Allene oxide cyclase, chloroplastic OS=Oryza sativa subsp. indica OX=39946 GN=AOC PE=2 SV=1 && PF06351:Allene oxide cyclase	-
CSS0044702	338.153	328.467	354.707	2449.15	2415.74	2387.15	340.442	2417.35	-2.8263	0	0	CSS0044702	Chr12	46244555	46250417	+	2667	protein_coding	- && sp|Q9S7Z8|PIN3_ARATH Auxin efflux carrier component 3 OS=Arabidopsis thaliana OX=3702 GN=PIN3 PE=1 SV=1 && PF03547:Membrane transport protein	-
CSS0016609	126.431	123.175	101.894	4466.04	4751.5	4548.4	117.167	4588.65	-5.29629	0	0	CSS0016609	Chr9	59219448	59223893	+	1831	protein_coding	- && sp|Q9FEL6|LAX3_MEDTR Auxin transporter-like protein 3 OS=Medicago truncatula OX=3880 GN=LAX3 PE=2 SV=1 && PF01490:Transmembrane amino acid transporter protein	Aa_trans
CSS0046529	59.2019	94.6625	79.785	1882.62	2019.63	1991.09	77.8831	1964.44	-4.6662	0	0	CSS0046529	Contig1134	738397	744362	-	1254	protein_coding	- && sp|Q9ZWQ9|FLS_CITUN Flavonol synthase/flavanone 3-hydroxylase OS=Citrus unshiu OX=55188 GN=FLS PE=1 SV=1 && PF03171:2OG-Fe(II) oxygenase superfamily|PF14226:non-haem dioxygenase in morphine synthesis N-terminal	2OG-FeII_Oxy
CSS0034576	616.101	598.769	632.513	4403.5	4040.21	3936.21	615.794	4126.64	-2.74359	0	0	CSS0034576	Chr6	27997958	27999403	+	1446	protein_coding	- && sp|P82280|RAV2_ARATH AP2/ERF and B3 domain-containing transcription repressor RAV2 OS=Arabidopsis thaliana OX=3702 GN=RAV2 PE=1 SV=1 && PF00847:AP2 domain|PF02362:B3 DNA binding domain	B3
CSS0013701	766.614	783.532	719.988	5265.25	5117.15	5352.27	756.711	5244.89	-2.79471	0	0	CSS0013701	Contig1172	181645	184730	+	2170	protein_coding	- && sp|Q6IEQ7|WRK24_ORYSJ WRKY transcription factor WRKY24 OS=Oryza sativa subsp. japonica OX=39947 GN=WRKY24 PE=2 SV=1 && PF03106:WRKY DNA -binding domain	WRKY
CSS0011753	3006.25	2898.04	2937.63	567.452	536.091	528.088	2947.31	543.877	2.43768	0	0	CSS0011753	Chr9	162695115	162701433	-	3102	protein_coding	- && sp|Q8LPQ8|MSSP2_ARATH Monosaccharide-sensing protein 2 OS=Arabidopsis thaliana OX=3702 GN=MSSP2 PE=1 SV=2 && PF00083:Sugar (and other) transporter	Sugar_tr
CSS0010264	2530.63	2408.76	2300.31	206.012	179.015	224.926	2413.23	203.318	3.56974	0	0	CSS0010264	Chr12	142002235	142009070	-	893	protein_coding	- && sp|Q14197|ICT1_HUMAN Peptidyl-tRNA hydrolase ICT1, mitochondrial OS=Homo sapiens OX=9606 GN=MRPL58 PE=1 SV=1 && PF00472:RF-1 domain	-
CSS0025345	2176.42	2081.43	2038.84	111.283	110.456	124.198	2098.9	115.312	4.18714	0	0	CSS0025345	Chr6	9017439	9020615	+	1867	protein_coding	- && sp|Q38954|PHT21_ARATH Inorganic phosphate transporter 2-1, chloroplastic OS=Arabidopsis thaliana OX=3702 GN=PHT2-1 PE=1 SV=1 && PF01384:Phosphate transporter family	-
CSS0042658	302.03	252.053	307.605	3636.47	3674.56	3733.78	287.229	3681.6	-3.67428	0	0	CSS0042658	Chr1	26174103	26178326	+	1067	protein_coding	- && sp|O82598|TIP13_ARATH Aquaporin TIP1-3 OS=Arabidopsis thaliana OX=3702 GN=TIP1-3 PE=1 SV=1 && PF00230:Major intrinsic protein	-
CSS0000656	3563.15	3351.96	3308.67	625.393	566.562	620.015	3407.93	603.99	2.49625	0	0	CSS0000656	Chr8	12060915	12062554	-	1640	protein_coding	- && sp|P29790|ATPG_TOBAC ATP synthase gamma chain, chloroplastic OS=Nicotiana tabacum OX=4097 GN=ATPC PE=1 SV=1 && PF00231:ATP synthase	-
CSS0038775	278.951	310.219	263.387	3477.37	3675.51	3560.68	284.186	3571.19	-3.65603	0	0	CSS0038775	Chr4	177582077	177588941	+	1821	protein_coding	- && sp|Q93Y40|ORP3C_ARATH Oxysterol-binding protein-related protein 3C OS=Arabidopsis thaliana OX=3702 GN=ORP3C PE=2 SV=1 && PF01237:Oxysterol-binding protein	-
CSS0016402	2300.85	2333.49	2161.89	216.128	216.15	206.346	2265.41	212.875	3.41091	0	0	CSS0016402	Chr6	44811053	44812674	+	1622	protein_coding	- && sp|O82199|C3H20_ARATH Zinc finger CCCH domain-containing protein 20 OS=Arabidopsis thaliana OX=3702 GN=At2g19810 PE=2 SV=1 && PF00642:Zinc finger C-x8-C-x5-C-x3-H type (and similar)	zf-CCCH
CSS0012730	4192.29	3900.55	3929.65	396.389	398.974	388.243	4007.5	394.535	3.34448	0	0	CSS0012730	Chr12	157890490	157892450	+	1961	protein_coding	- && sp|Q9FLE8|Y5986_ARATH Uncharacterized protein At5g39865 OS=Arabidopsis thaliana OX=3702 GN=At5g39865 PE=2 SV=1 && PF00462:Glutaredoxin	-
CSS0039743	3067.46	2968.75	3119.31	113.122	166.636	146.691	3051.84	142.15	4.42711	0	0	CSS0039743	Contig924	115786	118716	+	1117	protein_coding	- && sp|P54773|PSBS_SOLLC Photosystem II 22 kDa protein, chloroplastic OS=Solanum lycopersicum OX=4081 GN=PSBS PE=3 SV=1 && PF00504:Chlorophyll A-B binding protein	-
CSS0038044	182.623	228.102	179.757	2288.2	2346.23	2320.65	196.827	2318.36	-3.56536	0	0	CSS0038044	Contig24	218545	224967	+	1557	protein_coding	- && sp|Q8S4Y1|THIC1_ARATH Acetyl-CoA acetyltransferase, cytosolic 1 OS=Arabidopsis thaliana OX=3702 GN=AAT1 PE=1 SV=1 && PF00108:Thiolase, N-terminal domain|PF02803:Thiolase, C-terminal domain	Thiolase_N
CSS0028724	2247.66	2214.87	2299.35	105.765	104.743	89.9706	2253.96	100.159	4.49059	0	0	CSS0028724	Chr2	44808218	44811748	+	1081	protein_coding	- && sp|C0SVM5|BBX19_ARATH B-box zinc finger protein 19 OS=Arabidopsis thaliana OX=3702 GN=BBX19 PE=1 SV=1 && PF00643:B-box zinc finger	zf-B_box
CSS0024901	3347.41	3301.78	3056.82	324.652	404.687	360.86	3235.34	363.4	3.15486	0	0	CSS0024901	Chr3	7779288	7783166	-	1798	protein_coding	- && sp|Q944G9|ALFP2_ARATH Fructose-bisphosphate aldolase 2, chloroplastic OS=Arabidopsis thaliana OX=3702 GN=FBA2 PE=1 SV=2 && PF00274:Fructose-bisphosphate aldolase class-I	-
CSS0030770	394.345	327.327	356.629	3269.52	3152.75	3325	359.434	3249.09	-3.17324	0	0	CSS0030770	Chr7	156120980	156136072	+	2932	protein_coding	- && sp|Q9FKG6|PUB52_ARATH U-box domain-containing protein 52 OS=Arabidopsis thaliana OX=3702 GN=PUB52 PE=2 SV=1 && PF00069:Protein kinase domain|PF04564:U-box domain	Pkinase
CSS0041489	418.427	398.039	456.601	2958.66	3279.39	3067.8	424.355	3101.95	-2.86711	0	0	CSS0041489	Chr9	1259889	1262779	+	1688	protein_coding	- && sp|Q96552|METK2_CATRO S-adenosylmethionine synthase 2 OS=Catharanthus roseus OX=4058 GN=SAMS2 PE=1 SV=1 && PF00438:S-adenosylmethionine synthetase, N-terminal domain|PF02772:S-adenosylmethionine synthetase, central domain|PF02773:S-adenosylmethionine synthetase, C-terminal domain	-
CSS0020887	4148.14	3799.05	3830.64	36.7878	32.375	37.1618	3925.94	35.4415	6.7916	0	0	CSS0020887	Chr4	88708957	88716779	+	966	protein_coding	- && sp|Q67YC9|Y4141_ARATH Uncharacterized protein At4g14100 OS=Arabidopsis thaliana OX=3702 GN=At4g14100 PE=2 SV=1 && -	-
CSS0011860	315.074	296.533	317.218	2798.63	2750.92	2747.04	309.608	2765.53	-3.15719	0	0	CSS0011860	Chr2	91825064	91850828	-	1644	protein_coding	- && sp|Q42656|AGAL_COFAR Alpha-galactosidase OS=Coffea arabica OX=13443 PE=1 SV=1 && PF17801:Alpha galactosidase C-terminal beta sandwich domain|PF16499:Alpha galactosidase A	-
CSS0030453	4119.04	4122.95	3929.65	662.18	641.786	626.86	4057.22	643.609	2.6556	0	0	CSS0030453	Contig936	175587	177382	+	1796	protein_coding	- && sp|P29790|ATPG_TOBAC ATP synthase gamma chain, chloroplastic OS=Nicotiana tabacum OX=4097 GN=ATPC PE=1 SV=1 && PF00231:ATP synthase	-
CSS0012990	2209.53	2172.68	2062.88	202.333	185.68	171.14	2148.36	186.384	3.52515	0	0	CSS0012990	Contig61	497357	502208	-	2102	protein_coding	- && sp|Q43870|APS2_ARATH ATP sulfurylase 2 OS=Arabidopsis thaliana OX=3702 GN=APS2 PE=1 SV=1 && PF14306:PUA-like domain|PF01747:ATP-sulfurylase	-
CSS0001844	202.691	185.903	223.975	5590.83	5291.4	5361.07	204.19	5414.43	-4.72317	0	0	CSS0001844	Chr14	14976537	14977555	+	456	protein_coding	- && - && -	-
CSS0032244	387.321	333.03	324.908	2962.34	3202.26	3268.28	348.419	3144.29	-3.173	0	0	CSS0032244	Chr13	17088058	17092990	+	1551	protein_coding	- && sp|Q6NLQ6|CDPKW_ARATH Calcium-dependent protein kinase 32 OS=Arabidopsis thaliana OX=3702 GN=CPK32 PE=1 SV=1 && PF00069:Protein kinase domain|PF13499:EF-hand domain pair	Pkinase
novel.5347	2298.84	2401.92	2470.45	76.3347	112.36	121.265	2390.4	103.32	4.53679	0	0	-	Chr4	172233565	172240474	-	2837	-	- && sp|Q8RWU3|RVE8_ARATH Protein REVEILLE 8 OS=Arabidopsis thaliana OX=3702 GN=RVE8 PE=2 SV=1 && -	-
CSS0020675	3084.52	3127.28	3099.12	157.268	145.687	133	3103.64	145.318	4.41475	0	0	CSS0020675	Chr9	17369703	17371622	+	694	protein_coding	- && sp|D7T737|MTND1_VITVI 1,2-dihydroxy-3-keto-5-methylthiopentene dioxygenase 1 OS=Vitis vinifera OX=29760 GN=VIT_05s0020g04070 PE=3 SV=1 && PF03079:ARD/ARD' family	-
CSS0039784	359.225	342.154	291.263	3026.72	3073.72	2946.54	330.881	3015.66	-3.19068	0	0	CSS0039784	Chr8	137359064	137363961	+	2162	protein_coding	- && sp|C0LGE0|Y1765_ARATH Probable LRR receptor-like serine/threonine-protein kinase At1g07650 OS=Arabidopsis thaliana OX=3702 GN=At1g07650 PE=1 SV=1 && PF07714:Protein tyrosine kinase|PF11721:Malectin domain	Pkinase_Tyr
CSS0022458	308.05	303.376	304.721	2668.04	2618.56	2674.67	305.383	2653.76	-3.11913	0	0	CSS0022458	Chr7	40209208	40215946	-	1651	protein_coding	- && sp|Q8S4Y1|THIC1_ARATH Acetyl-CoA acetyltransferase, cytosolic 1 OS=Arabidopsis thaliana OX=3702 GN=AAT1 PE=1 SV=1 && PF00108:Thiolase, N-terminal domain|PF02803:Thiolase, C-terminal domain	Thiolase_N
CSS0021769	345.177	382.072	400.848	3972.16	3747.88	3678.04	376.032	3799.36	-3.33673	0	0	CSS0021769	Chr11	34833386	34842381	-	2289	protein_coding	- && sp|O24370|LOX21_SOLTU Linoleate 13S-lipoxygenase 2-1, chloroplastic OS=Solanum tuberosum OX=4113 GN=LOX2.1 PE=1 SV=1 && PF00305:Lipoxygenase|PF01477:PLAT/LH2 domain	Lipoxygenase
CSS0003697	3192.89	3079.38	2910.71	158.188	166.636	183.853	3060.99	169.559	4.1755	0	0	CSS0003697	Chr14	49384406	49387804	-	1413	protein_coding	- && sp|Q9LQ10|1A110_ARATH Probable aminotransferase ACS10 OS=Arabidopsis thaliana OX=3702 GN=ACS10 PE=1 SV=1 && PF00155:Aminotransferase class I and II	Aminotran_1_2
CSS0000918	117.4	103.787	81.7075	3371.6	3185.13	3280.99	100.965	3279.24	-5.02613	0	0	CSS0000918	Chr9	23164429	23167727	-	2743	protein_coding	- && sp|Q0WPQ2|ETR2_ARATH Ethylene receptor 2 OS=Arabidopsis thaliana OX=3702 GN=ETR2 PE=1 SV=2 && PF00512:His Kinase A (phospho-acceptor) domain|PF01590:GAF domain|PF00072:Response regulator receiver domain|PF02518:Histidine kinase-, DNA gyrase B-, and HSP90-like ATPase	Response_reg
CSS0020061	57.195	36.4964	37.4893	2161.28	2100.56	2133.87	43.7269	2131.9	-5.60152	0	0	CSS0020061	Chr3	36319995	36326595	-	2695	protein_coding	- && sp|A5JTQ3|XYL2_MEDSV Beta-xylosidase/alpha-L-arabinofuranosidase 2 OS=Medicago sativa subsp. varia OX=36902 GN=Xyl2 PE=2 SV=1 && PF01915:Glycosyl hydrolase family 3 C-terminal domain|PF00933:Glycosyl hydrolase family 3 N terminal domain|PF14310:Fibronectin type III-like domain	Glyco_hydro_3_C
CSS0036514	543.854	500.685	591.178	3962.97	3907.85	4293.16	545.239	4054.66	-2.89139	0	0	CSS0036514	Chr9	21318731	21320412	-	916	protein_coding	- && sp|Q9ZW24|GSTU7_ARATH Glutathione S-transferase U7 OS=Arabidopsis thaliana OX=3702 GN=GSTU7 PE=2 SV=1 && PF02798:Glutathione S-transferase, N-terminal domain	GST_N
CSS0017915	143.489	144.845	124.964	3925.26	3992.59	4046.72	137.766	3988.19	-4.8595	0	0	CSS0017915	Chr3	133899331	133900110	+	456	protein_coding	- && sp|O81865|P2A01_ARATH Protein PHLOEM PROTEIN 2-LIKE A1 OS=Arabidopsis thaliana OX=3702 GN=PP2A1 PE=2 SV=1 && PF14299:Phloem protein 2	-
CSS0001982	2121.23	1955.98	1969.63	47.8241	34.2794	34.2279	2015.61	38.7771	5.69534	0	0	CSS0001982	Chr5	158787189	158789645	-	390	protein_coding	- && sp|Q9SL05|PGR5_ARATH Protein PROTON GRADIENT REGULATION 5, chloroplastic OS=Arabidopsis thaliana OX=3702 GN=PGR5 PE=1 SV=1 && -	-
CSS0016579	321.095	283.987	311.45	3300.79	3014.68	3235.03	305.511	3183.5	-3.37859	0	0	CSS0016579	Chr8	142726305	142733325	-	1948	protein_coding	- && sp|Q9LRR9|GLO1_ARATH (S)-2-hydroxy-acid oxidase GLO1 OS=Arabidopsis thaliana OX=3702 GN=GLO1 PE=1 SV=1 && PF01070:FMN-dependent dehydrogenase	FMN_dh
CSS0044366	2806.57	2829.61	2743.45	187.618	159.97	125.176	2793.21	157.588	4.14378	0	0	CSS0044366	Chr4	88391037	88394660	+	1814	protein_coding	- && sp|Q94CG0|CIPKL_ARATH CBL-interacting serine/threonine-protein kinase 21 OS=Arabidopsis thaliana OX=3702 GN=CIPK21 PE=1 SV=1 && PF03822:NAF domain|PF00069:Protein kinase domain	Pkinase
CSS0009010	5416.47	5377.51	5748.37	156.348	160.923	126.154	5514.12	147.808	5.21932	0	0	CSS0009010	Chr7	39096499	39097591	-	526	protein_coding	- && sp|F2VYU4|PIK1_ORYSJ Disease resistance protein Pik-1 OS=Oryza sativa subsp. japonica OX=39947 GN=PIK-1 PE=1 SV=1 && -	-
CSS0014798	276.944	291.971	240.316	2686.43	2443.36	2509.4	269.744	2546.39	-3.243	0	0	CSS0014798	Chr13	119534667	119542214	+	2133	protein_coding	- && sp|P47924|RIBA1_ARATH Bifunctional riboflavin biosynthesis protein RIBA 1, chloroplastic OS=Arabidopsis thaliana OX=3702 GN=RIBA1 PE=1 SV=2 && PF00926:3,4-dihydroxy-2-butanone 4-phosphate synthase|PF00925:GTP cyclohydrolase II	DHBP_synthase
CSS0027700	215.736	222.4	229.742	3634.63	3658.37	3595.89	222.626	3629.63	-4.02661	0	0	CSS0027700	Chr6	61499576	61506553	-	2667	protein_coding	- && sp|Q38998|AKT1_ARATH Potassium channel AKT1 OS=Arabidopsis thaliana OX=3702 GN=AKT1 PE=1 SV=2 && PF00520:Ion transport protein|PF12796:Ankyrin repeats (3 copies)|PF00027:Cyclic nucleotide-binding domain|PF11834:KHA, dimerisation domain of potassium ion channel	Ion_trans
CSS0047128	319.088	306.798	312.411	3360.57	3386.99	3310.33	312.766	3352.63	-3.42143	0	0	CSS0047128	Chr8	9788211	9792617	+	2323	protein_coding	- && sp|Q9C519|WRKY6_ARATH WRKY transcription factor 6 OS=Arabidopsis thaliana OX=3702 GN=WRKY6 PE=1 SV=1 && PF03106:WRKY DNA -binding domain	WRKY
CSS0009618	3064.45	3052.01	3032.79	167.384	168.54	166.25	3049.75	167.392	4.18731	0	0	CSS0009618	Contig475	19545	25606	-	1668	protein_coding	- && sp|A0A3Q7HBJ5|C7A44_SOLLC Beta-amyrin 28-monooxygenase OS=Solanum lycopersicum OX=4081 GN=CYP716A44 PE=1 SV=1 && PF00067:Cytochrome P450	p450
CSS0004535	71.2429	55.8851	36.5281	2520.88	2350.04	2473.21	54.552	2448.05	-5.4951	0	0	CSS0004535	Chr7	13840032	13845855	-	1630	protein_coding	- && sp|Q9FIA1|GDL87_ARATH GDSL esterase/lipase At5g55050 OS=Arabidopsis thaliana OX=3702 GN=At5g55050 PE=2 SV=1 && PF00657:GDSL-like Lipase/Acylhydrolase	Lipase_GDSL
CSS0036676	242.828	229.243	220.13	2977.05	2988.97	2981.74	230.734	2982.59	-3.69265	0	0	CSS0036676	Chr7	180562850	180571683	+	1733	protein_coding	- && sp|B7KWT4|RUTD_METC4 Putative aminoacrylate hydrolase RutD OS=Methylorubrum extorquens (strain CM4 / NCIMB 13688) OX=440085 GN=rutD PE=3 SV=1 && PF00561:alpha/beta hydrolase fold	Abhydrolase_1
CSS0027461	2176.42	2393.93	2290.7	217.048	233.29	243.507	2287.02	231.282	3.30635	0	0	CSS0027461	Chr14	63761575	63763366	+	1373	protein_coding	- && sp|Q5XLY0|ANR_GINBI Putative anthocyanidin reductase OS=Ginkgo biloba OX=3311 PE=2 SV=1 && PF01370:NAD dependent epimerase/dehydratase family	Epimerase
CSS0044793	3248.08	3281.25	3221.2	100.247	93.3161	85.0809	3250.18	92.8812	5.12689	0	0	CSS0044793	Chr12	159578061	159582685	-	1581	protein_coding	- && sp|Q9ZNR0|C78A6_ARATH Cytochrome P450 78A6 OS=Arabidopsis thaliana OX=3702 GN=CYP78A6 PE=2 SV=1 && PF00067:Cytochrome P450	p450
CSS0039448	226.773	216.697	225.897	2481.34	2327.19	2282.51	223.123	2363.68	-3.40403	0	0	CSS0039448	Chr13	110330142	110330690	-	373	protein_coding	- && sp|Q9FS10|PSK_ASPOF Phytosulfokines OS=Asparagus officinalis OX=4686 GN=PSK PE=1 SV=1 && -	-
CSS0043607	2555.71	2346.03	2500.25	282.346	260.904	274.801	2467.33	272.684	3.17783	0	0	CSS0043607	Chr3	40958840	40977463	-	2918	protein_coding	- && sp|Q38898|AKT2_ARATH Potassium channel AKT2/3 OS=Arabidopsis thaliana OX=3702 GN=AKT2 PE=1 SV=1 && PF00027:Cyclic nucleotide-binding domain|PF00520:Ion transport protein|PF11834:KHA, dimerisation domain of potassium ion channel|PF12796:Ankyrin repeats (3 copies)	Ion_trans
CSS0009278	102.349	88.9599	86.5139	3511.4	3410.8	3507.87	92.6076	3476.69	-5.22963	0	0	CSS0009278	Chr9	51349807	51354362	-	1469	protein_coding	- && sp|B9FSC8|OPR11_ORYSJ Putative 12-oxophytodienoate reductase 11 OS=Oryza sativa subsp. japonica OX=39947 GN=OPR11 PE=2 SV=1 && PF00724:NADH:flavin oxidoreductase / NADH oxidase family	Oxidored_FMN
CSS0001719	45.154	62.7282	50.9471	2072.99	2472.88	2281.54	52.9431	2275.8	-5.43545	0	0	CSS0001719	Chr1	212641716	212652000	-	834	protein_coding	- && sp|Q8H103|G6PIP_ARATH Glucose-6-phosphate isomerase 1, chloroplastic OS=Arabidopsis thaliana OX=3702 GN=PGI1 PE=1 SV=1 && -	-
CSS0008747	241.825	241.789	257.619	2596.3	2938.5	2555.36	247.077	2696.72	-3.44693	0	0	CSS0008747	Chr8	106499856	106510544	+	2744	protein_coding	- && sp|Q9M7J9|POT8_ARATH Potassium transporter 8 OS=Arabidopsis thaliana OX=3702 GN=POT8 PE=2 SV=2 && PF02705:K+ potassium transporter	K_trans
CSS0008030	116.397	84.3979	91.3202	3167.43	3219.4	3102.03	97.3717	3162.95	-5.01619	0	0	CSS0008030	Chr4	179414691	179417436	+	2746	protein_coding	- && sp|P17801|KPRO_MAIZE Putative receptor protein kinase ZmPK1 OS=Zea mays OX=4577 GN=PK1 PE=2 SV=2 && PF00069:Protein kinase domain|PF01453:D-mannose binding lectin|PF00954:S-locus glycoprotein domain	Pkinase
CSS0028565	114.39	92.3815	93.2427	3509.56	3561.25	3604.69	100.005	3558.5	-5.15046	0	0	CSS0028565	Contig388	319818	321756	-	870	protein_coding	- && sp|Q9SAH7|WRK40_ARATH Probable WRKY transcription factor 40 OS=Arabidopsis thaliana OX=3702 GN=WRKY40 PE=1 SV=1 && PF03106:WRKY DNA -binding domain	WRKY
CSS0009388	67.2292	110.63	100.933	2631.25	2482.4	2548.51	92.9306	2554.05	-4.78801	0	0	CSS0009388	Chr4	128191365	128196877	+	2576	protein_coding	- && sp|Q9LVM0|Y5830_ARATH Probable inactive receptor kinase At5g58300 OS=Arabidopsis thaliana OX=3702 GN=At5g58300 PE=1 SV=1 && PF08263:Leucine rich repeat N-terminal domain|PF00069:Protein kinase domain	Pkinase
CSS0028008	215.736	171.077	210.517	2447.31	2293.86	2302.07	199.11	2347.75	-3.55369	0	0	CSS0028008	Chr13	72075384	72076230	+	816	protein_coding	- && sp|Q9LXM2|CAF1I_ARATH Probable CCR4-associated factor 1 homolog 9 OS=Arabidopsis thaliana OX=3702 GN=CAF1-9 PE=2 SV=1 && PF04857:CAF1 family ribonuclease	CAF1
CSS0005661	308.05	281.706	352.784	2786.68	2780.44	2822.34	314.18	2796.48	-3.14897	0	0	CSS0005661	Chr4	21197208	21200445	-	1755	protein_coding	- && sp|O49485|SERA1_ARATH D-3-phosphoglycerate dehydrogenase 1, chloroplastic OS=Arabidopsis thaliana OX=3702 GN=PGDH1 PE=1 SV=1 && PF02826:D-isomer specific 2-hydroxyacid dehydrogenase, NAD binding domain|PF00389:D-isomer specific 2-hydroxyacid dehydrogenase, catalytic domain	2-Hacid_dh_C
CSS0031869	2050.99	1973.09	2004.24	168.304	175.206	144.735	2009.44	162.748	3.62495	0	0	CSS0031869	Chr8	118025210	118039205	+	1720	protein_coding	- && sp|Q9LVD9|DTX40_ARATH Protein DETOXIFICATION 40 OS=Arabidopsis thaliana OX=3702 GN=DTX40 PE=1 SV=1 && PF01554:MatE	MatE
CSS0022692	54.1848	66.1497	51.9083	2371.89	2162.46	2162.23	57.4143	2232.19	-5.29046	0	0	CSS0022692	Chr8	130645408	130646362	-	921	protein_coding	- && sp|Q9LW49|ERF4_NICSY Ethylene-responsive transcription factor 4 OS=Nicotiana sylvestris OX=4096 GN=ERF4 PE=2 SV=1 && -	-
novel.9693	1778.06	1913.78	1880.23	97.4877	113.312	110.507	1857.36	107.102	4.11733	0	0	-	Contig88	72406	73349	-	786	-	- && - && -	-
CSS0025327	116.397	78.6953	108.623	1928.6	1965.35	1992.07	101.238	1962.01	-4.26552	0	0	CSS0025327	Chr5	192859325	192862355	+	1463	protein_coding	- && sp|C7G304|GOLS2_SOLLC Galactinol synthase 2 OS=Solanum lycopersicum OX=4081 GN=GOLS2 PE=2 SV=1 && PF01501:Glycosyl transferase family 8	Glyco_transf_8
CSS0043327	117.4	114.051	116.313	1873.42	1861.56	1900.14	115.922	1878.37	-4.01747	0	0	CSS0043327	Chr3	133973531	133978256	+	4342	protein_coding	- && sp|Q7XA40|RGA3_SOLBU Putative disease resistance protein RGA3 OS=Solanum bulbocastanum OX=147425 GN=RGA3 PE=2 SV=2 && PF18052:Rx N-terminal domain|PF00931:NB-ARC domain	NB-ARC
CSS0049122	102.349	75.2738	78.8237	2487.77	2386.23	2394	85.4822	2422.67	-4.82047	0	0	CSS0049122	Chr9	14968108	14979593	+	5729	protein_coding	- && sp|Q94AZ2|STP13_ARATH Sugar transport protein 13 OS=Arabidopsis thaliana OX=3702 GN=STP13 PE=1 SV=2 && PF00083:Sugar (and other) transporter	Sugar_tr
CSS0046214	96.3285	140.283	144.19	2050.92	2090.09	2131.91	126.934	2090.97	-4.04435	0	0	CSS0046214	Chr7	43359571	43364149	+	1009	protein_coding	- && sp|Q9ZVN4|DSP1_ARATH Tyrosine-protein phosphatase DSP1 OS=Arabidopsis thaliana OX=3702 GN=DSP1 PE=1 SV=1 && PF03162:Tyrosine phosphatase family	-
CSS0042335	57.195	57.0256	75.94	2279	2239.59	2259.04	63.3869	2259.21	-5.14691	0	0	CSS0042335	Chr1	157431284	157433645	+	1925	protein_coding	- && sp|Q9C598|NAC81_ARATH Protein ATAF2 OS=Arabidopsis thaliana OX=3702 GN=NAC081 PE=1 SV=1 && PF02365:No apical meristem (NAM) protein	NAM
CSS0001087	43.1471	31.9343	30.7605	2240.38	2115.8	2151.47	35.2806	2169.22	-5.9396	6.03213e-308	7.28283e-306	CSS0001087	Chr9	114593505	114594700	+	1196	protein_coding	- && sp|Q96289|ZAT10_ARATH Zinc finger protein ZAT10 OS=Arabidopsis thaliana OX=3702 GN=ZAT10 PE=2 SV=1 && PF13912:C2H2-type zinc finger	-
CSS0032453	128.438	132.299	127.848	2047.24	1851.09	1897.21	129.529	1931.84	-3.89987	1.17067e-307	1.40927e-305	CSS0032453	Chr8	149778364	149780407	-	2044	protein_coding	- && sp|Q9SA85|BBE8_ARATH Berberine bridge enzyme-like 8 OS=Arabidopsis thaliana OX=3702 GN=At1g30700 PE=2 SV=1 && PF01565:FAD binding domain|PF08031:Berberine and berberine like	FAD_binding_4
CSS0028030	3979.57	3860.63	3911.39	1000.63	990.293	1036.62	3917.2	1009.18	1.95698	1.54732e-306	1.85728e-304	CSS0028030	Chr9	132744912	132760573	-	3663	protein_coding	- && sp|Q9SUK9|P2C55_ARATH Probable protein phosphatase 2C 55 OS=Arabidopsis thaliana OX=3702 GN=At4g16580 PE=2 SV=2 && PF07228:Stage II sporulation protein E (SpoIIE)	SpoIIE
CSS0019787	290.992	262.318	240.316	2518.12	2370.04	2313.81	264.542	2400.66	-3.18278	5.06484e-306	6.06181e-304	CSS0019787	Chr4	13199416	13204520	+	2574	protein_coding	- && sp|C0LGK4|Y2165_ARATH Probable LRR receptor-like serine/threonine-protein kinase At2g16250 OS=Arabidopsis thaliana OX=3702 GN=At2g16250 PE=1 SV=1 && PF13855:Leucine rich repeat|PF07714:Protein tyrosine kinase	Pkinase_Tyr
CSS0036959	4619.75	4453.7	4594.85	1340.92	1321.66	1320.22	4556.1	1327.6	1.77915	5.43845e-306	6.49014e-304	CSS0036959	Chr8	129113862	129124125	-	4192	protein_coding	- && sp|Q8VY10|UBC24_ARATH Probable ubiquitin-conjugating enzyme E2 24 OS=Arabidopsis thaliana OX=3702 GN=UBC24 PE=1 SV=1 && PF00179:Ubiquitin-conjugating enzyme	UQ_con
CSS0005682	4363.88	4490.2	4460.27	10369.6	10963.7	10568.6	4438.12	10634	-1.26078	2.19282e-305	2.60933e-303	CSS0005682	Chr6	2002499	2003968	+	1096	protein_coding	- && sp|Q03200|LIRP1_ORYSJ Light-regulated protein, chloroplastic OS=Oryza sativa subsp. japonica OX=39947 GN=LIR1 PE=1 SV=1 && PF07207:Light regulated protein Lir1	-
CSS0032378	4082.92	4102.42	4069.04	1068.69	1019.81	1107.03	4084.79	1065.18	1.9393	1.67451e-304	1.98685e-302	CSS0032378	Chr4	11403491	11407616	-	1932	protein_coding	- && sp|Q40517|NTF3_TOBAC Mitogen-activated protein kinase homolog NTF3 OS=Nicotiana tabacum OX=4097 GN=NTF3 PE=1 SV=1 && PF00069:Protein kinase domain	Pkinase
CSS0015550	4097.97	4153.74	4233.41	1096.28	1113.13	1154.95	4161.71	1121.45	1.89218	3.92524e-304	4.64404e-302	CSS0015550	Chr14	72785630	72789772	+	1090	protein_coding	- && - && PF00903:Glyoxalase/Bleomycin resistance protein/Dioxygenase superfamily	Glyoxalase
CSS0019841	7230.65	7103.11	7498.83	2488.69	2368.13	2254.15	7277.53	2370.33	1.61821	3.65302e-303	4.30963e-301	CSS0019841	Chr10	62738809	62746453	+	2169	protein_coding	- && sp|A0A0S2IHL6|BASM1_KALSE Beta-amyrin synthase 1 OS=Kalopanax septemlobus OX=228393 GN=BAS1 PE=1 SV=1 && PF13249:Squalene-hopene cyclase N-terminal domain|PF13243:Squalene-hopene cyclase C-terminal domain	-
CSS0032947	1709.83	1671.99	1811.98	5556.8	5558.02	5488.2	1731.27	5534.34	-1.67551	5.08135e-303	5.97761e-301	CSS0032947	Chr9	21630909	21632587	-	895	protein_coding	- && sp|P32110|GSTX6_SOYBN Probable glutathione S-transferase OS=Glycine max OX=3847 GN=HSP26-A PE=2 SV=1 && PF02798:Glutathione S-transferase, N-terminal domain	GST_N
CSS0023503	504.721	450.502	446.988	2801.39	2832.81	2766.59	467.404	2800.27	-2.58218	1.11884e-302	1.31244e-300	CSS0023503	Chr10	130812883	130819946	+	1932	protein_coding	- && sp|Q9M325|IPCS1_ARATH Phosphatidylinositol:ceramide inositolphosphotransferase 1 OS=Arabidopsis thaliana OX=3702 GN=IPCS1 PE=2 SV=1 && PF14360:PAP2 superfamily C-terminal	-
CSS0043145	1476.03	1329.84	1522.64	5767.41	5423.76	5492.12	1442.84	5561.09	-1.94463	2.15101e-301	2.51607e-299	CSS0043145	Chr7	177591763	177594744	+	2036	protein_coding	- && sp|P93604|LRK10_WHEAT Rust resistance kinase Lr10 OS=Triticum aestivum OX=4565 GN=LRK10 PE=2 SV=1 && PF00069:Protein kinase domain	Pkinase
CSS0041510	2324.93	2399.64	2311.84	6655.83	6411.2	6580.56	2345.47	6549.2	-1.48206	1.01337e-299	1.182e-297	CSS0041510	Chr1	17685837	17691290	-	2208	protein_coding	- && sp|Q84WB7|GINT1_ARATH Glucosamine inositolphosphorylceramide transferase 1 OS=Arabidopsis thaliana OX=3702 GN=GINT1 PE=1 SV=1 && PF09258:Glycosyl transferase family 64 domain	-
novel.8112	1833.25	1789.46	1750.46	34.9484	59.9889	45.9632	1791.06	46.9668	5.25634	1.21911e-299	1.41798e-297	-	Chr9	44801071	44845190	-	15110	-	- && sp|P04323|POL3_DROME Retrovirus-related Pol polyprotein from transposon 17.6 OS=Drosophila melanogaster OX=7227 GN=pol PE=4 SV=1 && PF13456:Reverse transcriptase-like	-
CSS0001490	4865.59	4768.48	4692.9	1461.4	1441.64	1392.59	4775.66	1431.87	1.7375	1.70525e-299	1.97785e-297	CSS0001490	Chr2	67040063	67043088	-	1664	protein_coding	- && sp|Q9LVJ0|UVB31_ARATH UV-B-induced protein At3g17800, chloroplastic OS=Arabidopsis thaliana OX=3702 GN=At3g17800 PE=2 SV=1 && PF05542:Protein of unknown function (DUF760)	-
CSS0022343	2114.21	1895.53	2055.19	40.4666	32.375	24.4485	2021.64	32.43	5.95613	1.82129e-297	2.10652e-295	CSS0022343	Chr11	111632409	111633122	-	714	protein_coding	- && - && -	-
CSS0029704	4251.5	4455.98	4405.48	1159.74	1169.31	1238.07	4370.99	1189.04	1.87835	7.9787e-297	9.20247e-295	CSS0029704	Chr12	89633575	89642281	+	2646	protein_coding	- && sp|Q67Y69|WDL7_ARATH Protein WVD2-like 7 OS=Arabidopsis thaliana OX=3702 GN=WDL7 PE=2 SV=1 && PF06886:Targeting protein for Xklp2 (TPX2)	-
CSS0007349	2864.77	3101.05	3024.14	481.92	545.613	531.022	2996.65	519.518	2.5285	1.29224e-296	1.48629e-294	CSS0007349	Chr7	62656099	62666541	+	1466	protein_coding	- && sp|Q3AF07|DNAJ_CARHZ Chaperone protein DnaJ OS=Carboxydothermus hydrogenoformans (strain ATCC BAA-161 / DSM 6008 / Z-2901) OX=246194 GN=dnaJ PE=3 SV=1 && PF13370:4Fe-4S single cluster domain of Ferredoxin I	-
CSS0049619	756.58	783.532	718.065	3368.84	3418.42	3343.58	752.726	3376.95	-2.1671	1.80412e-296	2.06927e-294	CSS0049619	Chr4	129048749	129051955	+	1680	protein_coding	- && sp|Q6IEQ7|WRK24_ORYSJ WRKY transcription factor WRKY24 OS=Oryza sativa subsp. japonica OX=39947 GN=WRKY24 PE=2 SV=1 && PF03106:WRKY DNA -binding domain	WRKY
CSS0014663	360.228	354.699	303.76	2460.18	2493.82	2455.61	339.562	2469.87	-2.86532	3.45896e-296	3.95634e-294	CSS0014663	Contig1096	99000	104025	-	1921	protein_coding	- && sp|Q9LI61|AVT6A_ARATH Amino acid transporter AVT6A OS=Arabidopsis thaliana OX=3702 GN=AVT6A PE=2 SV=1 && PF01490:Transmembrane amino acid transporter protein	Aa_trans
CSS0044928	88.3011	78.6953	90.3589	1758.46	1753.96	1957.84	85.7851	1823.42	-4.40505	2.96755e-295	3.38489e-293	CSS0044928	Chr5	164255720	164259676	-	3004	protein_coding	- && sp|Q0WPQ2|ETR2_ARATH Ethylene receptor 2 OS=Arabidopsis thaliana OX=3702 GN=ETR2 PE=1 SV=2 && PF02518:Histidine kinase-, DNA gyrase B-, and HSP90-like ATPase|PF00072:Response regulator receiver domain|PF01590:GAF domain|PF00512:His Kinase A (phospho-acceptor) domain	Response_reg
CSS0011628	1695.78	1650.32	1758.15	89.2104	80.9374	63.5662	1701.42	77.9047	4.44565	3.41466e-295	3.88416e-293	CSS0011628	Chr4	12144048	12147025	-	1610	protein_coding	- && sp|Q9FJZ3|MAN7_ARATH Mannan endo-1,4-beta-mannosidase 7 OS=Arabidopsis thaliana OX=3702 GN=MAN7 PE=2 SV=1 && PF00150:Cellulase (glycosyl hydrolase family 5)	-
CSS0025373	4937.84	5003.43	4949.55	1615.9	1572.09	1620.45	4963.61	1602.81	1.63069	8.35665e-295	9.47952e-293	CSS0025373	Chr14	59130930	59131559	+	630	protein_coding	- && sp|Q38897|BEL1_ARATH Homeobox protein BEL1 homolog OS=Arabidopsis thaliana OX=3702 GN=BEL1 PE=1 SV=2 && -	-
CSS0000607	628.142	768.705	659.428	3788.22	3669.8	3636.96	685.425	3698.33	-2.43517	1.83318e-294	2.07381e-292	CSS0000607	Chr9	4637162	4644099	-	2643	protein_coding	- && sp|Q9FGX1|ACLB2_ARATH ATP-citrate synthase beta chain protein 2 OS=Arabidopsis thaliana OX=3702 GN=ACLB-2 PE=1 SV=1 && -	-
CSS0016481	3991.61	3995.21	4144.01	907.739	957.918	816.581	4043.61	894.079	2.17683	7.5335e-294	8.49907e-292	CSS0016481	Chr7	58341477	58346775	+	1134	protein_coding	- && sp|Q94A68|Y1669_ARATH Uncharacterized oxidoreductase At1g06690, chloroplastic OS=Arabidopsis thaliana OX=3702 GN=At1g06690 PE=1 SV=1 && PF00248:Aldo/keto reductase family	Aldo_ket_red
CSS0037703	5621.17	5634.13	5409.04	1881.7	1879.65	1882.54	5554.78	1881.29	1.56178	4.3258e-292	4.86694e-290	CSS0037703	Chr1	1124614	1146822	+	4059	protein_coding	- && sp|Q8W1Y0|SSC14_ARATH Sister chromatid cohesion 1 protein 4 OS=Arabidopsis thaliana OX=3702 GN=SYN4 PE=2 SV=1 && PF04825:N terminus of Rad21 / Rec8 like protein|PF04824:Conserved region of Rad21 / Rec8 like protein	Rad21_Rec8_N
CSS0029120	2200.5	2040.38	2011.93	220.727	230.434	196.566	2084.27	215.909	3.27027	9.51911e-291	1.06808e-288	CSS0029120	Chr4	118522810	118527185	-	1992	protein_coding	- && sp|O49394|C82C2_ARATH Xanthotoxin 5-hydroxylase CYP82C2 OS=Arabidopsis thaliana OX=3702 GN=CYP82C2 PE=1 SV=2 && PF00067:Cytochrome P450	p450
CSS0028985	448.529	500.685	519.083	2968.78	2826.14	2837.01	489.432	2877.31	-2.55571	1.05414e-290	1.17958e-288	CSS0028985	Chr3	7476980	7479902	+	2923	protein_coding	- && sp|O23141|SPE2_ARATH Arginine decarboxylase 2 OS=Arabidopsis thaliana OX=3702 GN=ADC2 PE=1 SV=1 && PF02784:Pyridoxal-dependent decarboxylase, pyridoxal binding domain	-
CSS0010945	6322.56	6352.65	6085.77	13861.6	13314.7	13431	6253.66	13535.8	-1.11441	1.24899e-290	1.39384e-288	CSS0010945	Chr6	175628277	175629312	+	1036	protein_coding	- && sp|Q39613|CYPH_CATRO Peptidyl-prolyl cis-trans isomerase OS=Catharanthus roseus OX=4058 GN=PCKR1 PE=1 SV=1 && PF00160:Cyclophilin type peptidyl-prolyl cis-trans isomerase/CLD	Pro_isomerase
CSS0029450	166.568	193.887	151.88	2018.73	2112.94	1931.43	170.778	2021.04	-3.57156	3.70329e-290	4.12163e-288	CSS0029450	Chr15	40033864	40046078	-	3770	protein_coding	- && sp|P42762|CLPD_ARATH Chaperone protein ClpD, chloroplastic OS=Arabidopsis thaliana OX=3702 GN=CLPD PE=1 SV=1 && PF02861:Clp amino terminal domain, pathogenicity island component|PF07724:AAA domain (Cdc48 subfamily)|PF10431:C-terminal, D2-small domain, of ClpB protein|PF00004:ATPase family associated with various cellular activities (AAA)|PF17871:AAA lid domain	Clp_N
CSS0032675	2304.86	2545.62	2291.66	308.098	259	272.846	2380.71	279.981	3.08638	5.2648e-288	5.84379e-286	CSS0032675	Chr9	18520741	18526367	-	2039	protein_coding	- && sp|Q9FME2|NTF2_ARATH Nuclear transport factor 2 OS=Arabidopsis thaliana OX=3702 GN=NTF2 PE=1 SV=1 && PF00076:RNA recognition motif. (a.k.a. RRM, RBD, or RNP domain)|PF02136:Nuclear transport factor 2 (NTF2) domain	RRM_1
CSS0001914	598.039	627.282	573.875	2954.98	3117.52	2996.41	599.732	3022.97	-2.33528	1.98075e-287	2.19268e-285	CSS0001914	Chr4	162344718	162345495	-	778	protein_coding	- && sp|Q9SJM6|SAP4_ARATH Zinc finger A20 and AN1 domain-containing stress-associated protein 4 OS=Arabidopsis thaliana OX=3702 GN=SAP4 PE=1 SV=1 && PF01754:A20-like zinc finger|PF01428:AN1-like Zinc finger	zf-AN1
CSS0015665	53.1813	36.4964	47.102	1819.16	1744.44	1765.18	45.5932	1776.26	-5.27315	1.34413e-286	1.48397e-284	CSS0015665	Chr4	188720480	188724459	+	1017	protein_coding	- && sp|Q948P6|FRI3_SOYBN Ferritin-3, chloroplastic OS=Glycine max OX=3847 PE=2 SV=1 && PF00210:Ferritin-like domain	Ferritin
novel.6129	1715.85	1599	1822.56	49.6635	55.2279	68.4559	1712.47	57.7824	4.89361	4.309e-286	4.74461e-284	-	Chr6	25647584	25658622	+	2532	-	- && - && -	-
CSS0038850	41.1403	49.042	34.6055	1771.33	1863.46	1885.47	41.5959	1840.09	-5.47955	4.35945e-286	4.7874e-284	CSS0038850	Chr3	183897657	183899975	+	2319	protein_coding	- && sp|Q9MAM3|KCS1_ARATH 3-ketoacyl-CoA synthase 1 OS=Arabidopsis thaliana OX=3702 GN=KCS1 PE=1 SV=1 && PF08392:FAE1/Type III polyketide synthase-like protein|PF08541:3-Oxoacyl-[acyl-carrier-protein (ACP)] synthase III C terminal	-
CSS0033223	206.705	175.639	196.098	1959.87	2046.29	1911.87	192.814	1972.68	-3.35134	1.16924e-285	1.28062e-283	CSS0033223	Chr2	159447553	159472271	-	2209	protein_coding	- && sp|F4IPM3|CB60E_ARATH Calmodulin-binding protein 60 E OS=Arabidopsis thaliana OX=3702 GN=CBP60E PE=2 SV=1 && PF07887:Calmodulin binding protein-like	-
CSS0004438	2127.25	2235.4	2197.45	210.61	246.621	270.89	2186.7	242.707	3.1733	5.67989e-285	6.20446e-283	CSS0004438	Chr2	202033179	202041692	-	2808	protein_coding	- && sp|Q03194|PMA4_NICPL Plasma membrane ATPase 4 OS=Nicotiana plumbaginifolia OX=4092 GN=PMA4 PE=2 SV=1 && PF00122:E1-E2 ATPase|PF00702:haloacid dehalogenase-like hydrolase|PF00690:Cation transporter/ATPase, N-terminus	E1-E2_ATPase
CSS0050433	4857.56	4491.34	4836.13	1295.85	1314.04	1225.36	4728.34	1278.42	1.88718	7.50346e-285	8.17481e-283	CSS0050433	Chr13	61959059	61975303	-	2745	protein_coding	- && sp|Q6DW74|DGDG1_LOTJA Digalactosyldiacylglycerol synthase 1, chloroplastic OS=Lotus japonicus OX=34305 GN=DGD1 PE=2 SV=1 && PF00534:Glycosyl transferases group 1	Glycos_transf_1
CSS0046429	169.578	132.299	148.035	2149.33	2012.01	1875.69	149.971	2012.34	-3.74201	5.56208e-284	6.04379e-282	CSS0046429	Chr14	20473750	20477532	+	3279	protein_coding	- && sp|P47735|RLK5_ARATH Receptor-like protein kinase 5 OS=Arabidopsis thaliana OX=3702 GN=RLK5 PE=1 SV=1 && PF13855:Leucine rich repeat|PF00069:Protein kinase domain	Pkinase
CSS0045116	8030.38	7464.65	8036.18	18378.3	17992.9	17346.7	7843.74	17905.9	-1.19032	1.37572e-283	1.48703e-281	CSS0045116	Chr7	87010322	87013802	-	524	protein_coding	- && sp|O82089|CCH_ARATH Copper transport protein CCH OS=Arabidopsis thaliana OX=3702 GN=CCH PE=1 SV=1 && -	-
CSS0012421	1934.6	1934.31	1836.98	26.6712	31.4228	28.3603	1901.96	28.8181	6.04509	3.86746e-283	4.16949e-281	CSS0012421	Chr4	108775461	108776286	+	796	protein_coding	- && sp|Q5NUF4|HIDM_GLYEC 2-hydroxyisoflavanone dehydratase OS=Glycyrrhiza echinata OX=46348 GN=HIDM PE=1 SV=1 && PF07859:alpha/beta hydrolase fold	Abhydrolase_3
CSS0037342	2894.87	2854.7	2963.58	576.649	509.43	571.118	2904.38	552.399	2.39453	3.48861e-282	3.75125e-280	CSS0037342	Chr6	67100909	67101915	+	1007	protein_coding	- && - && -	-
CSS0036494	3564.15	3470.58	3781.62	863.594	836.988	838.095	3605.45	846.226	2.09135	1.7078e-281	1.8316e-279	CSS0036494	Chr9	56007566	56012718	+	1398	protein_coding	- && sp|Q00763|COMT1_POPTM Caffeic acid 3-O-methyltransferase 1 OS=Populus tremuloides OX=3693 GN=OMT1 PE=1 SV=1 && PF00891:O-methyltransferase domain|PF08100:Dimerisation domain	-
CSS0009309	24.0821	44.48	29.7992	1921.24	1995.82	1985.22	32.7871	1967.43	-5.92802	6.27603e-280	6.71356e-278	CSS0009309	Chr11	88868680	88869574	-	895	protein_coding	- && sp|A0A3Q7I5Y9|ERFC3_SOLLC Ethylene-response factor C3 OS=Solanum lycopersicum OX=4081 GN=ERF.C.3 PE=2 SV=1 && PF00847:AP2 domain	AP2
CSS0009229	9810.45	10021.7	10089.4	3854.44	4176.37	4124.95	9973.86	4051.92	1.29978	7.02982e-280	7.50048e-278	CSS0009229	Chr3	186297755	186299595	-	315	protein_coding	- && sp|Q8LCA1|CUT1B_ARATH Protein CURVATURE THYLAKOID 1B, chloroplastic OS=Arabidopsis thaliana OX=3702 GN=CURT1B PE=1 SV=2 && PF14159:CAAD domains of cyanobacterial aminoacyl-tRNA synthetase	-
CSS0026809	547.868	553.148	613.287	2902.56	3016.58	2931.87	571.435	2950.34	-2.36659	1.5611e-279	1.66133e-277	CSS0026809	Chr15	38764288	38771949	-	2065	protein_coding	- && - && -	-
CSS0005573	2405.2	2454.38	2134.01	190.377	241.86	238.618	2331.2	223.618	3.38317	2.94804e-279	3.12924e-277	CSS0005573	Chr2	211604399	211606566	-	453	protein_coding	- && sp|Q6QPJ6|PRXQ_POPJC Peroxiredoxin Q, chloroplastic OS=Populus jackii OX=640484 GN=PRXQ PE=1 SV=1 && PF00578:AhpC/TSA family	-
CSS0033832	2020.89	2024.41	2035.96	237.281	248.525	274.801	2027.09	253.536	3.00037	5.59713e-279	5.92592e-277	CSS0033832	Chr10	32078624	32088878	-	2174	protein_coding	- && sp|Q9S713|STT7_ARATH Serine/threonine-protein kinase STN7, chloroplastic OS=Arabidopsis thaliana OX=3702 GN=STN7 PE=1 SV=1 && PF00069:Protein kinase domain	Pkinase
CSS0011908	94.3216	117.473	108.623	1639.82	1690.16	1665.43	106.806	1665.14	-3.96663	1.30735e-277	1.38061e-275	CSS0011908	Chr14	10159829	10163019	-	1794	protein_coding	- && - && PF13962:Domain of unknown function|PF12796:Ankyrin repeats (3 copies)	-
CSS0008562	2242.65	2381.39	2350.29	6448.9	6784.46	6489.62	2324.78	6574.33	-1.50013	3.3401e-277	3.51827e-275	CSS0008562	Chr1	148025199	148027300	-	2102	protein_coding	- && sp|O65665|ERF60_ARATH Ethylene-responsive transcription factor ERF060 OS=Arabidopsis thaliana OX=3702 GN=ERF060 PE=1 SV=1 && PF00847:AP2 domain	AP2
CSS0004384	12.0411	15.9672	19.2253	3618.08	3512.68	3520.59	15.7445	3550.45	-7.81325	4.27289e-277	4.48937e-275	CSS0004384	Chr15	72066966	72071492	+	2377	protein_coding	- && sp|Q9M1P7|BOR2_ARATH Probable boron transporter 2 OS=Arabidopsis thaliana OX=3702 GN=BOR2 PE=2 SV=1 && PF00955:HCO3- transporter family	-
CSS0016981	9454.24	9457.13	9200.27	3962.05	4112.57	3872.65	9370.54	3982.42	1.23429	1.3656e-275	1.43115e-273	CSS0016981	Chr2	37177224	37181587	-	2456	protein_coding	- && sp|Q40459|PSBO_TOBAC Oxygen-evolving enhancer protein 1, chloroplastic OS=Nicotiana tabacum OX=4097 GN=PSBO PE=2 SV=1 && -	-
CSS0035731	1749.97	1928.61	1942.72	125.998	137.117	166.25	1873.76	143.122	3.71296	9.05902e-275	9.46977e-273	CSS0035731	Chr1	3736497	3748822	+	1971	protein_coding	- && sp|Q9SWF9|ZFNL_PEA Zinc finger CCCH domain-containing protein ZFN-like OS=Pisum sativum OX=3888 PE=2 SV=1 && PF00642:Zinc finger C-x8-C-x5-C-x3-H type (and similar)	zf-CCCH
CSS0045275	11497.2	11469	10599.9	4463.28	4584.87	4416.38	11188.7	4488.18	1.31756	3.66209e-272	3.81847e-270	CSS0045275	Chr1	155667057	155668301	-	1015	protein_coding	- && sp|P49107|PSAN_ARATH Photosystem I reaction center subunit N, chloroplastic OS=Arabidopsis thaliana OX=3702 GN=PSAN PE=1 SV=2 && PF05479:Photosystem I reaction centre subunit N (PSAN or PSI-N)	-
CSS0000935	3328.35	3444.35	3481.7	732.997	825.562	740.301	3418.13	766.287	2.15735	1.36568e-271	1.42041e-269	CSS0000935	Chr3	75660199	75662543	+	2345	protein_coding	- && - && -	-
CSS0042039	35.1197	26.2318	26.9154	1924	1912.98	2011.62	29.4223	1949.54	-6.04579	1.48486e-271	1.54049e-269	CSS0042039	Chr3	139316992	139341747	+	4843	protein_coding	- && sp|Q9M1C7|AB9C_ARATH ABC transporter C family member 9 OS=Arabidopsis thaliana OX=3702 GN=ABCC9 PE=2 SV=2 && -	-
CSS0015263	339.156	309.079	299.915	2176.92	2177.69	2177.87	316.05	2177.49	-2.78428	3.41165e-270	3.53059e-268	CSS0015263	Contig881	13062	15359	+	2001	protein_coding	- && sp|Q9LHF1|LRX4_ARATH Leucine-rich repeat extensin-like protein 4 OS=Arabidopsis thaliana OX=3702 GN=LRX4 PE=1 SV=1 && PF13855:Leucine rich repeat	-
CSS0049942	661.255	628.422	679.615	3022.12	3300.34	3151.9	656.43	3158.12	-2.26481	3.67706e-270	3.79574e-268	CSS0049942	Chr11	6727036	6727982	+	802	protein_coding	- && sp|P17642|PRS2_SOLTU Pathogenesis-related protein STH-2 OS=Solanum tuberosum OX=4113 GN=STH-2 PE=2 SV=1 && PF00407:Pathogenesis-related protein Bet v I family	-
CSS0005178	301.026	331.889	358.552	2319.47	2257.68	2291.32	330.489	2289.49	-2.79159	4.62287e-270	4.76017e-268	CSS0005178	Chr15	8548884	8549888	+	913	protein_coding	- && - && -	-
CSS0015304	252.862	269.161	329.714	2312.11	2325.28	2379.33	283.912	2338.91	-3.03891	8.0462e-269	8.26457e-267	CSS0015304	Chr10	123507820	123512659	+	1876	protein_coding	- && sp|Q65XV8|RK176_ORYSJ Receptor-like cytoplasmic kinase 176 OS=Oryza sativa subsp. japonica OX=39947 GN=RLCK176 PE=1 SV=1 && PF00069:Protein kinase domain	Pkinase
CSS0045242	402.372	366.104	380.661	2287.28	2335.76	2337.28	383.046	2320.11	-2.59719	3.83566e-268	3.92998e-266	CSS0045242	Chr5	14955728	14959395	+	1494	protein_coding	- && sp|Q9SIB9|ACO3M_ARATH Aconitate hydratase 3, mitochondrial OS=Arabidopsis thaliana OX=3702 GN=ACO3 PE=1 SV=2 && PF00330:Aconitase family (aconitate hydratase)	Aconitase
CSS0007130	647.207	569.115	622.9	2921.87	3028.96	2987.61	613.074	2979.48	-2.27874	5.62485e-268	5.7489e-266	CSS0007130	Chr3	72705654	72714309	+	2035	protein_coding	- && sp|O22494|GSHB_SOLLC Glutathione synthetase, chloroplastic OS=Solanum lycopersicum OX=4081 GN=GSH2 PE=2 SV=1 && PF03199:Eukaryotic glutathione synthase|PF03917:Eukaryotic glutathione synthase, ATP binding domain	-
CSS0002775	50.1711	27.3723	36.5281	1814.56	1681.59	1852.22	38.0238	1782.79	-5.53744	4.79718e-267	4.89087e-265	CSS0002775	Chr7	40631962	40633142	-	1071	protein_coding	- && sp|Q9SU13|FLA2_ARATH Fasciclin-like arabinogalactan protein 2 OS=Arabidopsis thaliana OX=3702 GN=FLA2 PE=2 SV=1 && PF02469:Fasciclin domain	-
CSS0027657	58.1984	53.6041	59.5984	1546.93	1511.15	1570.57	57.1336	1542.88	-4.75135	6.99533e-266	7.11439e-264	CSS0027657	Chr2	49820849	49822648	-	1800	protein_coding	- && sp|Q9SVG0|AVT3C_ARATH Amino acid transporter AVT3C OS=Arabidopsis thaliana OX=3702 GN=AVT3C PE=1 SV=1 && PF01490:Transmembrane amino acid transporter protein	Aa_trans
CSS0029663	612.087	655.794	618.094	3177.55	2905.18	3057.04	628.658	3046.59	-2.27825	9.56019e-265	9.69902e-263	CSS0029663	Chr3	1521843	1524502	-	2405	protein_coding	- && sp|P48021|HMDH_CAMAC 3-hydroxy-3-methylglutaryl-coenzyme A reductase OS=Camptotheca acuminata OX=16922 PE=3 SV=1 && PF00368:Hydroxymethylglutaryl-coenzyme A reductase	-
CSS0041036	5607.12	6023.04	5488.82	1769.49	1731.11	1627.29	5706.33	1709.3	1.73835	2.65373e-264	2.68566e-262	CSS0041036	Chr9	72651890	72664475	+	1648	protein_coding	- && sp|P14766|F16P2_SPIOL Fructose-1,6-bisphosphatase, cytosolic OS=Spinacia oleracea OX=3562 PE=1 SV=2 && PF00316:Fructose-1-6-bisphosphatase, N-terminal domain	-
CSS0008095	323.102	331.889	331.637	2098.74	2175.79	2230.68	328.876	2168.41	-2.7211	3.22564e-264	3.25648e-262	CSS0008095	Chr11	13249056	13268044	+	2820	protein_coding	- && sp|Q8RWI9|AB15G_ARATH ABC transporter G family member 15 OS=Arabidopsis thaliana OX=3702 GN=ABCG15 PE=2 SV=2 && PF00005:ABC transporter|PF01061:ABC-2 type transporter	ABC2_membrane
CSS0000711	1734.92	1886.41	1785.07	194.056	197.106	200.478	1802.13	197.213	3.1917	5.38625e-264	5.42448e-262	CSS0000711	Chr14	40428082	40453142	+	1968	protein_coding	- && sp|O81816|MO2_ARATH Monooxygenase 2 OS=Arabidopsis thaliana OX=3702 GN=MO2 PE=2 SV=1 && PF01494:FAD binding domain	FAD_binding_3
CSS0023409	2031.93	2040.38	1931.18	266.712	241.86	220.037	2001.16	242.869	3.04079	2.48613e-263	2.49769e-261	CSS0023409	Chr7	52496574	52502636	-	2127	protein_coding	- && sp|Q9ZNS2|GH310_ARATH Indole-3-acetic acid-amido synthetase GH3.10 OS=Arabidopsis thaliana OX=3702 GN=GH3.10 PE=2 SV=1 && PF03321:GH3 auxin-responsive promoter	-
CSS0032095	373.273	387.774	393.157	2724.14	3465.07	3144.08	384.735	3111.1	-3.01535	4.28339e-263	4.29285e-261	CSS0032095	Chr12	132122411	132131588	+	1212	protein_coding	- && sp|Q42583|KPRS2_ARATH Ribose-phosphate pyrophosphokinase 2, chloroplastic OS=Arabidopsis thaliana OX=3702 GN=PRS2 PE=2 SV=2 && PF14572:Phosphoribosyl synthetase-associated domain|PF13793:N-terminal domain of ribose phosphate pyrophosphokinase	-
CSS0013924	1012.45	978.559	948.769	4105.52	3725.03	3951.86	979.927	3927.47	-2.00314	1.29367e-262	1.29339e-260	CSS0013924	Chr12	36629540	36631325	+	1719	protein_coding	- && sp|Q8S4W7|GAI1_VITVI DELLA protein GAI1 OS=Vitis vinifera OX=29760 GN=GAI1 PE=2 SV=1 && PF03514:GRAS domain family|PF12041:Transcriptional regulator DELLA protein N terminal	GRAS
CSS0019948	466.591	411.725	445.066	2705.74	2523.34	2508.42	441.127	2579.17	-2.54574	5.67884e-261	5.66389e-259	CSS0019948	Chr5	14966278	14969599	+	1155	protein_coding	- && sp|P49608|ACOC_CUCMA Aconitate hydratase, cytoplasmic OS=Cucurbita maxima OX=3661 PE=2 SV=1 && PF00694:Aconitase C-terminal domain|PF00330:Aconitase family (aconitate hydratase)	Aconitase
CSS0011466	718.45	682.026	693.072	3436.9	3089.9	3232.09	697.849	3252.97	-2.22037	6.05671e-261	6.02621e-259	CSS0011466	Chr11	117363977	117365864	+	1302	protein_coding	- && sp|P11965|PERX_TOBAC Lignin-forming anionic peroxidase OS=Nicotiana tabacum OX=4097 PE=2 SV=1 && PF00141:Peroxidase	-
CSS0022023	2930.99	2909.45	2855.92	673.217	625.599	608.279	2898.79	635.698	2.18829	4.48698e-260	4.45365e-258	CSS0022023	Chr15	47251821	47260745	-	2935	protein_coding	- && sp|Q5RBA3|F214B_PONAB Protein FAM214B OS=Pongo abelii OX=9601 GN=FAM214B PE=2 SV=1 && PF13889:Chromosome segregation during meiosis	-
CSS0033873	259.886	262.318	268.193	2027.01	2179.6	1965.66	263.466	2057.42	-2.96484	6.57695e-260	6.51245e-258	CSS0033873	Chr8	130323476	130327260	-	3021	protein_coding	- && sp|Q05349|12KD_FRAAN Auxin-repressed 12.5 kDa protein OS=Fragaria ananassa OX=3747 PE=2 SV=1 && PF05564:Dormancy/auxin associated protein	-
CSS0049117	1886.43	1815.7	1580.32	123.239	130.452	122.243	1760.82	125.311	3.81219	1.07966e-259	1.06652e-257	CSS0049117	Chr10	60533863	60551483	+	1341	protein_coding	- && sp|Q54RA4|Y3291_DICDI Probable iron/ascorbate oxidoreductase DDB_G0283291 OS=Dictyostelium discoideum OX=44689 GN=DDB_G0283291 PE=3 SV=1 && PF03171:2OG-Fe(II) oxygenase superfamily|PF14226:non-haem dioxygenase in morphine synthesis N-terminal	2OG-FeII_Oxy
CSS0034071	6590.47	6400.55	6676.95	2571.47	2622.37	2591.54	6555.99	2595.13	1.33735	1.85021e-259	1.82332e-257	CSS0034071	Contig78	113734	116411	-	938	protein_coding	- && sp|Q9FGT8|TIL_ARATH Temperature-induced lipocalin-1 OS=Arabidopsis thaliana OX=3702 GN=TIL PE=1 SV=1 && PF08212:Lipocalin-like domain	Lipocalin_2
CSS0020810	1608.48	1547.67	1633.19	34.9484	34.2794	26.4044	1596.45	31.8774	5.64318	4.94952e-259	4.86596e-257	CSS0020810	Chr3	60184323	60185607	+	615	protein_coding	- && - && PF01439:Metallothionein	-
CSS0012806	49.1676	29.6533	36.5281	1881.7	1718.73	1638.05	38.4497	1746.16	-5.49461	1.33905e-258	1.31332e-256	CSS0012806	Chr1	66881837	66882766	-	930	protein_coding	- && sp|P17407|21KD_DAUCA 21 kDa protein OS=Daucus carota OX=4039 PE=2 SV=1 && PF04043:Plant invertase/pectin methylesterase inhibitor	-
CSS0004787	2666.09	2592.38	2918.4	494.796	445.632	451.809	2725.63	464.079	2.55407	1.90192e-258	1.86095e-256	CSS0004787	Chr4	120068863	120072118	-	1893	protein_coding	- && sp|Q9LSE7|B561C_ARATH Cytochrome b561 and DOMON domain-containing protein At3g25290 OS=Arabidopsis thaliana OX=3702 GN=At3g25290 PE=2 SV=1 && PF03188:Eukaryotic cytochrome b561|PF04526:Protein of unknown function (DUF568)	Cytochrom_B561
CSS0011054	757.583	772.127	729.6	3112.25	3048.01	3138.21	753.103	3099.49	-2.04208	2.06774e-258	2.01841e-256	CSS0011054	Chr13	69428968	69429637	-	513	protein_coding	- && - && -	-
CSS0022856	1579.39	1527.15	1553.4	99.3271	121.882	89.9706	1553.31	103.727	3.90397	2.19666e-258	2.1392e-256	CSS0022856	Chr8	104138971	104145416	-	2907	protein_coding	- && sp|Q94A08|RFS2_ARATH Probable galactinol--sucrose galactosyltransferase 2 OS=Arabidopsis thaliana OX=3702 GN=RFS2 PE=2 SV=2 && PF05691:Raffinose synthase or seed imbibition protein Sip1	-
CSS0017382	121.414	148.267	157.647	1774.09	1667.31	1792.57	142.443	1744.66	-3.61465	4.16142e-258	4.04304e-256	CSS0017382	Chr7	168021694	168024235	-	1509	protein_coding	- && sp|Q0WUQ1|BAG1_ARATH BAG family molecular chaperone regulator 1 OS=Arabidopsis thaliana OX=3702 GN=BAG1 PE=1 SV=1 && PF02179:BAG domain|PF00240:Ubiquitin family	ubiquitin
CSS0021341	2910.93	2899.18	3003.95	584.926	513.238	470.39	2938.02	522.851	2.48921	3.10801e-257	3.0125e-255	CSS0021341	Chr10	7759999	7793187	+	2598	protein_coding	- && sp|E0ZS48|UREA_ORYSI Urease OS=Oryza sativa subsp. indica OX=39946 PE=1 SV=1 && PF00547:Urease, gamma subunit|PF00699:Urease beta subunit|PF18473:Urease subunit beta-alpha linker domain|PF01979:Amidohydrolase family|PF00449:Urease alpha-subunit, N-terminal domain	Amidohydro_1
CSS0049656	1800.14	1658.3	1730.28	177.501	172.349	147.669	1729.57	165.84	3.38137	1.422e-256	1.37507e-254	CSS0049656	Chr6	56846830	56860446	-	2086	protein_coding	- && sp|Q3E9A0|ANTR6_ARATH Probable anion transporter 6, chloroplastic OS=Arabidopsis thaliana OX=3702 GN=ANTR6 PE=2 SV=1 && PF07690:Major Facilitator Superfamily	MFS_1
CSS0011086	2945.04	3212.82	3137.57	679.655	718.915	679.669	3098.48	692.746	2.1609	3.53778e-255	3.41304e-253	CSS0011086	Chr4	90876485	90877812	+	711	protein_coding	- && - && -	-
CSS0019128	4749.19	4730.84	4634.26	1643.49	1593.99	1609.69	4704.77	1615.73	1.54171	2.16049e-254	2.07946e-252	CSS0019128	Chr1	151936775	151961187	-	2968	protein_coding	- && sp|Q93Y08|AB1K8_ARATH Protein ACTIVITY OF BC1 COMPLEX KINASE 8, chloroplastic OS=Arabidopsis thaliana OX=3702 GN=ABC1K8 PE=2 SV=1 && PF03109:ABC1 family	ABC1
CSS0036992	5480.69	5209.86	5195.64	1799.84	1656.84	1682.06	5295.4	1712.91	1.62805	1.56152e-253	1.49946e-251	CSS0036992	Chr9	12742227	12746650	-	1414	protein_coding	- && sp|Q93W28|Y4554_ARATH Uncharacterized protein At4g15545 OS=Arabidopsis thaliana OX=3702 GN=At4g15545 PE=1 SV=1 && -	-
CSS0004973	1682.74	1813.41	1752.39	199.574	207.581	201.456	1749.51	202.87	3.10809	6.66987e-253	6.38992e-251	CSS0004973	Chr6	106018051	106022119	+	999	protein_coding	- && sp|Q40316|VESTR_MEDSA Vestitone reductase OS=Medicago sativa OX=3879 PE=1 SV=1 && PF01370:NAD dependent epimerase/dehydratase family	Epimerase
CSS0006418	6108.83	6401.69	6250.15	2441.79	2316.71	2349.99	6253.56	2369.5	1.39969	1.62519e-251	1.55337e-249	CSS0006418	Chr1	180747504	180753056	+	2156	protein_coding	- && sp|P50433|GLYM_SOLTU Serine hydroxymethyltransferase, mitochondrial OS=Solanum tuberosum OX=4113 PE=2 SV=1 && PF00464:Serine hydroxymethyltransferase	SHMT
CSS0020760	3205.93	3336	3346.16	867.272	891.264	880.147	3296.03	879.561	1.9059	3.13706e-250	2.9915e-248	CSS0020760	Chr6	64628352	64634188	+	1735	protein_coding	- && - && PF07466:Protein of unknown function (DUF1517)	-
CSS0019909	112.383	91.241	122.081	1617.74	1520.67	1583.29	108.568	1573.9	-3.84932	1.09441e-249	1.04123e-247	CSS0019909	Chr11	117761911	117764164	-	2254	protein_coding	- && - && -	-
CSS0004277	4873.62	4809.54	4673.67	1604.87	1645.41	1667.39	4785.61	1639.22	1.54576	3.31294e-249	3.14471e-247	CSS0004277	Chr12	150681985	150686510	-	1983	protein_coding	- && sp|P48488|PP1_MEDSV Serine/threonine-protein phosphatase PP1 OS=Medicago sativa subsp. varia OX=36902 GN=PP1 PE=2 SV=1 && PF16891:Serine-threonine protein phosphatase N-terminal domain|PF00149:Calcineurin-like phosphoesterase	Metallophos
CSS0004975	1017.47	1051.55	1053.55	3577.61	3595.53	3698.57	1040.86	3623.9	-1.79986	1.05035e-248	9.94729e-247	CSS0004975	Chr2	111666204	111672477	+	2948	protein_coding	- && sp|Q41142|PLDA1_RICCO Phospholipase D alpha 1 OS=Ricinus communis OX=3988 GN=PLD1 PE=1 SV=1 && PF00614:Phospholipase D Active site motif|PF00168:C2 domain|PF12357:Phospholipase D C terminal	C2
CSS0017486	139.476	128.878	148.035	1596.59	1659.69	1551.99	138.796	1602.76	-3.5258	1.17951e-248	1.11449e-246	CSS0017486	Chr7	61604802	61608347	+	2356	protein_coding	- && - && PF05097:Protein of unknown function (DUF688)	-
CSS0013198	1652.64	1733.58	1674.52	23.9121	23.8051	25.4265	1686.91	24.3812	6.11301	1.65719e-248	1.56226e-246	CSS0013198	Chr10	34778322	34795599	-	1632	protein_coding	- && sp|Q9SX20|PTR18_ARATH Protein NRT1/ PTR FAMILY 3.1 OS=Arabidopsis thaliana OX=3702 GN=NPF3.1 PE=2 SV=1 && PF00854:POT family	-
CSS0009272	3063.45	3111.32	3097.2	774.383	811.279	748.125	3090.65	777.929	1.98997	1.9336e-248	1.81868e-246	CSS0009272	Chr15	106175710	106181245	+	754	protein_coding	- && sp|Q9SX29|CLPS1_ARATH ATP-dependent Clp protease adapter protein CLPS1, chloroplastic OS=Arabidopsis thaliana OX=3702 GN=CPLS1 PE=1 SV=1 && PF02617:ATP-dependent Clp protease adaptor protein ClpS	-
CSS0028383	6445.98	6521.45	6673.1	2630.33	2476.68	2478.1	6546.84	2528.37	1.37242	2.20126e-248	2.06573e-246	CSS0028383	Chr5	7781434	7784827	+	1587	protein_coding	- && sp|P46256|ALF1_PEA Fructose-bisphosphate aldolase, cytoplasmic isozyme 1 OS=Pisum sativum OX=3888 PE=2 SV=1 && PF00274:Fructose-bisphosphate aldolase class-I	-
CSS0016563	417.423	368.385	422.957	2462.94	2303.38	2384.22	402.922	2383.52	-2.56153	1.08632e-247	1.01712e-245	CSS0016563	Chr15	26600408	26603185	-	1525	protein_coding	- && sp|Q9C942|CSE_ARATH Caffeoylshikimate esterase OS=Arabidopsis thaliana OX=3702 GN=CSE PE=1 SV=1 && PF12146:Serine aminopeptidase, S33	-
CSS0007900	9972	9395.54	9061.85	3836.97	3696.46	3767.03	9476.46	3766.82	1.3309	3.07679e-247	2.8743e-245	CSS0007900	Chr3	186301613	186302431	-	300	protein_coding	- && - && -	-
CSS0048610	41.1403	43.3395	43.2569	1535.89	1446.4	1480.6	42.5789	1487.63	-5.12743	6.25649e-247	5.83153e-245	CSS0048610	Chr13	18275635	18280317	+	1590	protein_coding	- && sp|Q00451|PRF1_SOLLC 36.4 kDa proline-rich protein OS=Solanum lycopersicum OX=4081 GN=TPRP-F1 PE=2 SV=1 && PF14547:Hydrophobic seed protein	-
CSS0003100	29.0992	58.1661	49.9858	1563.48	1524.48	1524.61	45.7504	1537.52	-5.08257	1.74723e-246	1.62488e-244	CSS0003100	Chr1	42370661	42372485	+	1116	protein_coding	- && sp|O80871|P2C25_ARATH Probable protein phosphatase 2C 25 OS=Arabidopsis thaliana OX=3702 GN=At2g30020 PE=1 SV=1 && PF00481:Protein phosphatase 2C	PP2C
CSS0002506	930.172	883.897	829.572	3599.69	3899.28	4067.26	881.213	3855.41	-2.12962	3.7146e-246	3.44673e-244	CSS0002506	Chr11	74931080	74936724	-	1790	protein_coding	- && sp|Q43054|TCMO_POPKI Trans-cinnamate 4-monooxygenase OS=Populus kitakamiensis OX=34292 GN=CYP73A16 PE=2 SV=1 && PF00067:Cytochrome P450	p450
CSS0048734	3046.39	2900.32	2882.83	712.764	673.209	707.051	2943.18	697.675	2.07675	1.49749e-245	1.38639e-243	CSS0048734	Contig1192	9387	16328	+	1002	protein_coding	- && - && PF10184:Uncharacterized conserved protein (DUF2358)	-
CSS0035111	77.2634	92.3815	117.274	1613.14	1548.29	1556.88	95.6398	1572.77	-4.03492	1.71637e-244	1.58547e-242	CSS0035111	Chr4	187213406	187215706	-	1515	protein_coding	- && sp|Q84KJ6|AMT31_ORYSJ Ammonium transporter 3 member 1 OS=Oryza sativa subsp. japonica OX=39947 GN=AMT3-1 PE=2 SV=1 && PF00909:Ammonium Transporter Family	Ammonium_transp
CSS0003548	54.1848	38.7774	32.683	1554.28	1482.58	1505.05	41.8817	1513.97	-5.17613	2.40294e-244	2.21473e-242	CSS0003548	Chr9	51456576	51462203	-	1627	protein_coding	- && sp|B9FSC8|OPR11_ORYSJ Putative 12-oxophytodienoate reductase 11 OS=Oryza sativa subsp. japonica OX=39947 GN=OPR11 PE=2 SV=1 && PF00724:NADH:flavin oxidoreductase / NADH oxidase family	Oxidored_FMN
CSS0020805	2733.32	2416.74	2670.39	397.308	305.658	324.676	2606.82	342.547	2.92701	2.70647e-244	2.48893e-242	CSS0020805	Chr6	95673975	95677734	-	1114	protein_coding	- && sp|B2X050|MNR1_CAPAN (+)-neomenthol dehydrogenase OS=Capsicum annuum OX=4072 GN=MNR1 PE=1 SV=1 && PF00106:short chain dehydrogenase|PF13561:Enoyl-(Acyl carrier protein) reductase	adh_short
novel.3001	22.0753	26.2318	33.6443	1912.97	1755.87	1694.77	27.3171	1787.87	-6.02594	4.66508e-244	4.28058e-242	-	Chr15	16173357	16193906	+	2183	-	- && sp|Q8S3D2|BH087_ARATH Transcription factor bHLH87 OS=Arabidopsis thaliana OX=3702 GN=BHLH87 PE=1 SV=1 && PF00010:Helix-loop-helix DNA-binding domain	HLH
CSS0025882	468.598	546.305	477.749	2805.07	2608.09	2644.35	497.551	2685.84	-2.4356	2.22354e-243	2.03575e-241	CSS0025882	Chr13	28034350	28036805	+	1305	protein_coding	- && sp|Q55EX9|Y8948_DICDI Putative methyltransferase DDB_G0268948 OS=Dictyostelium discoideum OX=44689 GN=DDB_G0268948 PE=1 SV=2 && PF08241:Methyltransferase domain	Methyltransf_11
novel.8312	13.0445	33.0748	23.0704	2065.63	2120.56	1870.8	23.0632	2019	-6.47588	6.31115e-243	5.76534e-241	-	Chr9	148908718	148910815	-	744	-	- && sp|P46689|GASA1_ARATH Gibberellin-regulated protein 1 OS=Arabidopsis thaliana OX=3702 GN=GASA1 PE=2 SV=2 && -	-
CSS0014930	438.495	419.708	433.531	2406.84	2275.77	2276.65	430.578	2319.75	-2.42891	6.44907e-243	5.87833e-241	CSS0014930	Chr3	94551000	94583783	+	2455	protein_coding	- && sp|Q9C9L5|WAKLH_ARATH Wall-associated receptor kinase-like 9 OS=Arabidopsis thaliana OX=3702 GN=WAKL9 PE=2 SV=1 && -	-
CSS0047093	334.139	331.889	388.351	2303.84	2171.98	2276.65	351.46	2250.82	-2.67628	8.86044e-243	8.05851e-241	CSS0047093	Chr14	115423788	115434351	-	2253	protein_coding	- && sp|Q9LHS0|CAP10_ARATH Putative clathrin assembly protein At5g35200 OS=Arabidopsis thaliana OX=3702 GN=At5g35200 PE=1 SV=1 && PF07651:ANTH domain	-
CSS0016177	1042.55	1149.64	1081.42	3846.16	3755.5	3790.5	1091.2	3797.39	-1.80047	1.52982e-242	1.3883e-240	CSS0016177	Chr9	149171408	149175923	+	1425	protein_coding	- && sp|A0A4D6Q4T7|FL3H2_CROXC Flavanone 3-dioxygenase F3H2 OS=Crocosmia x crocosmiiflora OX=1053288 GN=F3H-2 PE=1 SV=1 && PF14226:non-haem dioxygenase in morphine synthesis N-terminal|PF03171:2OG-Fe(II) oxygenase superfamily	2OG-FeII_Oxy
CSS0013223	209.715	177.92	176.873	1686.72	1734.92	1762.25	188.169	1727.96	-3.19764	7.21294e-242	6.53135e-240	CSS0013223	Chr9	47494151	47495375	-	1088	protein_coding	- && sp|Q9M2U5|CHI5_ARATH Endochitinase EP3 OS=Arabidopsis thaliana OX=3702 GN=EP3 PE=1 SV=1 && PF00182:Chitinase class I	-
CSS0021474	149.51	127.737	129.771	1571.76	1514.01	1602.85	135.673	1562.87	-3.52423	9.26696e-242	8.37291e-240	CSS0021474	Chr4	169480393	169484431	-	2625	protein_coding	- && sp|P45726|PALY_CAMSI Phenylalanine ammonia-lyase OS=Camellia sinensis OX=4442 GN=PAL PE=2 SV=1 && PF00221:Aromatic amino acid lyase	-
CSS0033692	95.325	77.5548	108.623	1616.82	1481.63	1501.14	93.8343	1533.2	-4.02084	1.00255e-241	9.03845e-240	CSS0033692	Chr15	9271040	9273756	-	1509	protein_coding	- && sp|Q9ZUF4|RIPK_ARATH Serine/threonine-protein kinase RIPK OS=Arabidopsis thaliana OX=3702 GN=RIPK PE=1 SV=1 && PF07714:Protein tyrosine kinase	Pkinase_Tyr
CSS0029616	557.902	599.909	550.805	2843.7	2652.84	2672.71	569.539	2723.08	-2.25928	1.48762e-241	1.33824e-239	CSS0029616	Chr4	21286804	21288266	+	1463	protein_coding	- && sp|O23160|MYB73_ARATH Transcription factor MYB73 OS=Arabidopsis thaliana OX=3702 GN=MYB73 PE=1 SV=1 && PF00249:Myb-like DNA-binding domain	Myb_DNA-binding
CSS0036468	2961.1	2934.54	2918.4	719.201	765.573	748.125	2938.01	744.3	1.98114	9.27687e-241	8.3272e-239	CSS0036468	Chr3	173941396	173956285	+	2371	protein_coding	- && sp|Q8GX78|ANTR2_ARATH Ascorbate transporter, chloroplastic OS=Arabidopsis thaliana OX=3702 GN=PHT4;4 PE=1 SV=1 && PF07690:Major Facilitator Superfamily	MFS_1
CSS0032944	38.13	34.2154	49.0245	1488.99	1533.05	1425.84	40.4566	1482.62	-5.18413	1.16065e-240	1.03958e-238	CSS0032944	Chr7	106477234	106479183	+	1950	protein_coding	- && sp|Q9LZ72|KCS19_ARATH 3-ketoacyl-CoA synthase 19 OS=Arabidopsis thaliana OX=3702 GN=KCS19 PE=2 SV=1 && PF08392:FAE1/Type III polyketide synthase-like protein|PF08541:3-Oxoacyl-[acyl-carrier-protein (ACP)] synthase III C terminal	-
CSS0014809	4302.67	4390.97	4525.64	1457.72	1476.87	1412.15	4406.43	1448.91	1.60461	1.8066e-240	1.61464e-238	CSS0014809	Chr6	7590198	7590789	-	546	protein_coding	- && sp|P80470|PSBY_SPIOL Photosystem II core complex proteins psbY, chloroplastic OS=Spinacia oleracea OX=3562 GN=PSBY PE=1 SV=2 && PF06298:Photosystem II protein Y (PsbY)	-
CSS0006117	183.626	147.126	167.26	1624.18	1759.67	1683.04	166.004	1688.96	-3.34247	4.86945e-239	4.34265e-237	CSS0006117	Chr8	1866187	1869843	-	824	protein_coding	- && - && -	-
CSS0040189	1157.95	1302.46	1199.66	4351.08	4165.9	4158.2	1220.02	4225.06	-1.79373	7.04945e-239	6.27325e-237	CSS0040189	Chr9	21090968	21097578	-	2072	protein_coding	- && sp|Q4FE47|XB35_ARATH Putative E3 ubiquitin-protein ligase XBAT35 OS=Arabidopsis thaliana OX=3702 GN=XBAT35 PE=2 SV=1 && PF13920:Zinc finger, C3HC4 type (RING finger)	-
CSS0027450	5299.07	5877.06	5523.43	1593.83	1767.29	1606.76	5566.52	1655.96	1.7488	2.84776e-238	2.52875e-236	CSS0027450	Chr10	5850004	5850932	-	228	protein_coding	- && - && -	-
CSS0024262	2636.99	2612.91	2544.47	6758.84	6384.53	6754.64	2598.12	6632.67	-1.35236	1.47293e-237	1.30513e-235	CSS0024262	Chr11	18779138	18786221	-	2685	protein_coding	- && sp|O82802|SIR1_TOBAC Sulfite reductase 1 [ferredoxin], chloroplastic OS=Nicotiana tabacum OX=4097 GN=SIR1 PE=1 SV=1 && PF01077:Nitrite and sulphite reductase 4Fe-4S domain|PF03460:Nitrite/Sulfite reductase ferredoxin-like half domain	-
CSS0000613	595.029	609.033	683.46	3011.08	2855.66	2897.64	629.174	2921.46	-2.21367	4.71746e-237	4.17106e-235	CSS0000613	Chr7	69079410	69091464	-	3095	protein_coding	- && sp|C0LGE0|Y1765_ARATH Probable LRR receptor-like serine/threonine-protein kinase At1g07650 OS=Arabidopsis thaliana OX=3702 GN=At1g07650 PE=1 SV=1 && PF07714:Protein tyrosine kinase|PF13855:Leucine rich repeat|PF11721:Malectin domain	Pkinase_Tyr
CSS0050266	43.1471	26.2318	46.1407	1451.28	1475.92	1459.09	38.5065	1462.09	-5.2271	8.13685e-237	7.17903e-235	CSS0050266	Chr4	25297310	25303317	+	1213	protein_coding	- && sp|P53118|ROG1_YEAST Putative lipase ROG1 OS=Saccharomyces cerevisiae (strain ATCC 204508 / S288c) OX=559292 GN=ROG1 PE=1 SV=1 && PF05057:Putative serine esterase (DUF676)	-
CSS0019568	1339.57	1422.22	1389.03	98.4074	106.647	89.9706	1383.6	98.3416	3.8135	1.96412e-236	1.72922e-234	CSS0019568	Chr5	37079082	37083259	+	555	protein_coding	- && sp|Q01IX6|DAO_ORYSI 2-oxoglutarate-dependent dioxygenase DAO OS=Oryza sativa subsp. indica OX=39946 GN=DAO PE=3 SV=1 && PF03171:2OG-Fe(II) oxygenase superfamily	2OG-FeII_Oxy
CSS0041266	8165.84	8268.71	8358.2	3897.67	3832.62	3852.11	8264.25	3860.8	1.09796	2.57066e-236	2.2584e-234	CSS0041266	Contig13	79512	82511	+	1191	protein_coding	- && sp|O23787|THI4_CITSI Thiamine thiazole synthase, chloroplastic OS=Citrus sinensis OX=2711 GN=THI1 PE=2 SV=1 && PF01946:Thi4 family	-
CSS0027812	184.63	181.341	197.059	1629.7	1735.87	1631.21	187.677	1665.59	-3.14783	1.62866e-235	1.4278e-233	CSS0027812	Chr11	65201841	65203830	+	1908	protein_coding	- && sp|Q9XE58|SCL14_ARATH Scarecrow-like protein 14 OS=Arabidopsis thaliana OX=3702 GN=SCL14 PE=1 SV=2 && PF03514:GRAS domain family	GRAS
novel.9319	1834.25	1955.98	2208.99	197.734	200.915	231.772	1999.74	210.141	3.25188	2.57713e-235	2.2545e-233	-	Contig555	47743	51597	-	782	-	- && - && -	-
CSS0015487	2058.02	2141.88	2037.88	332.01	296.136	352.059	2079.26	326.735	2.66991	3.72411e-235	3.251e-233	CSS0015487	Chr8	86753954	86763535	+	4041	protein_coding	- && sp|P55004|PHYE_IPONI Phytochrome E OS=Ipomoea nil OX=35883 GN=PHYE PE=2 SV=1 && PF00360:Phytochrome region|PF02518:Histidine kinase-, DNA gyrase B-, and HSP90-like ATPase|PF00989:PAS fold|PF01590:GAF domain|PF00512:His Kinase A (phospho-acceptor) domain|PF08446:PAS fold	GAF
CSS0015144	3354.44	3169.48	3600.9	809.332	768.429	798.978	3374.94	792.246	2.09139	4.93062e-235	4.29516e-233	CSS0015144	Chr7	33795681	33799569	-	1720	protein_coding	- && sp|H2DH21|C7A29_PANGI Cytochrome P450 CYP72A219 OS=Panax ginseng OX=4054 PE=2 SV=1 && PF00067:Cytochrome P450	p450
CSS0028009	2066.04	2075.73	2123.43	391.79	386.595	387.265	2088.4	388.55	2.42626	1.14449e-234	9.9489e-233	CSS0028009	Chr2	85742779	85757583	-	1795	protein_coding	- && sp|A0A078ISJ6|TC32B_BRANA Short-chain dehydrogenase TIC 32 B, chloroplastic OS=Brassica napus OX=3708 GN=TIC32B PE=3 SV=1 && PF00106:short chain dehydrogenase	adh_short
CSS0010342	2500.53	2398.5	2264.74	439.614	376.121	409.757	2387.92	408.497	2.54665	1.70357e-234	1.47777e-232	CSS0010342	Chr2	56319880	56322995	+	1432	protein_coding	- && sp|Q9SZ83|Y4967_ARATH Uncharacterized oxidoreductase At4g09670 OS=Arabidopsis thaliana OX=3702 GN=At4g09670 PE=1 SV=1 && PF01408:Oxidoreductase family, NAD-binding Rossmann fold	GFO_IDH_MocA
CSS0032979	7366.12	7413.33	7290.24	3293.43	3153.7	3268.28	7356.56	3238.47	1.18356	7.06032e-234	6.11169e-232	CSS0032979	Chr14	35250170	35256065	+	626	protein_coding	- && sp|Q9XHE4|RL37A_GOSHI 60S ribosomal protein L37a OS=Gossypium hirsutum OX=3635 GN=RPL37A PE=3 SV=1 && PF01780:Ribosomal L37ae protein family	-
CSS0017030	691.357	733.349	716.143	2877.73	3101.33	2937.73	713.616	2972.26	-2.05898	3.48517e-233	3.01059e-231	CSS0017030	Chr9	17891518	17893019	+	1194	protein_coding	- && sp|P32294|AX22B_VIGRR Auxin-induced protein 22B OS=Vigna radiata var. radiata OX=3916 GN=AUX22B PE=2 SV=1 && PF02309:AUX/IAA family	-
CSS0048080	1740.94	1806.57	1834.09	4947.96	4893.38	5061.82	1793.87	4967.72	-1.46946	4.68309e-233	4.03694e-231	CSS0048080	Chr3	22152333	22155817	+	941	protein_coding	- && sp|Q6NQP4|LRR2_ARATH Leucine-rich repeat protein 2 OS=Arabidopsis thaliana OX=3702 GN=LRR2 PE=2 SV=1 && PF08263:Leucine rich repeat N-terminal domain	LRRNT_2
CSS0003165	5681.37	6012.78	5818.54	2229.34	2242.44	2299.14	5837.56	2256.97	1.37081	1.21748e-232	1.04731e-230	CSS0003165	Chr14	19251836	19257261	+	2831	protein_coding	- && sp|Q852L0|HD16N_ORYSJ Casein kinase 1-like protein HD16 OS=Oryza sativa subsp. japonica OX=39947 GN=HD16 PE=1 SV=1 && PF00069:Protein kinase domain	Pkinase
CSS0002360	8081.56	8105.62	7723.77	3481.05	3286.06	3342.6	7970.31	3369.9	1.24154	1.27775e-232	1.09687e-230	CSS0002360	Chr7	121352829	121357062	-	1468	protein_coding	- && sp|P43287|PIP22_ARATH Aquaporin PIP2-2 OS=Arabidopsis thaliana OX=3702 GN=PIP2-2 PE=1 SV=2 && PF00230:Major intrinsic protein	-
CSS0048481	1526.2	1505.48	1482.27	114.962	140.926	149.625	1504.65	135.171	3.47891	3.49735e-231	2.98984e-229	CSS0048481	Chr8	50391406	50393627	+	1356	protein_coding	- && sp|Q6K3R5|NCL2_ORYSJ Sodium/calcium exchanger NCL2 OS=Oryza sativa subsp. japonica OX=39947 GN=NCL2 PE=2 SV=2 && PF13499:EF-hand domain pair	-
CSS0048779	2584.81	2611.77	2714.61	599.641	584.654	630.772	2637.07	605.022	2.12436	8.99826e-231	7.67659e-229	CSS0048779	Chr2	211651192	211654424	-	1282	protein_coding	- && sp|Q6QPJ6|PRXQ_POPJC Peroxiredoxin Q, chloroplastic OS=Populus jackii OX=640484 GN=PRXQ PE=1 SV=1 && PF00578:AhpC/TSA family	-
CSS0008620	81.2771	83.2574	59.5984	1602.11	1389.27	1457.13	74.711	1482.84	-4.31908	1.81737e-230	1.54724e-228	CSS0008620	Chr11	36037660	36038929	-	1270	protein_coding	- && sp|Q9LXM2|CAF1I_ARATH Probable CCR4-associated factor 1 homolog 9 OS=Arabidopsis thaliana OX=3702 GN=CAF1-9 PE=2 SV=1 && PF04857:CAF1 family ribonuclease	CAF1
CSS0029155	1149.92	1219.21	1309.24	4112.88	4156.37	4167.98	1226.12	4145.74	-1.7569	2.29562e-230	1.95038e-228	CSS0029155	Chr9	63782316	63786918	-	1119	protein_coding	- && sp|Q500U8|TKPR1_ARATH Tetraketide alpha-pyrone reductase 1 OS=Arabidopsis thaliana OX=3702 GN=TKPR1 PE=1 SV=1 && PF13460:NAD(P)H-binding	-
CSS0017412	11733	11789.5	11923.5	5394.93	5607.53	5842.22	11815.3	5614.89	1.07361	3.87491e-230	3.2854e-228	CSS0017412	Chr9	161070879	161077171	+	1899	protein_coding	- && sp|P17598|CATA1_GOSHI Catalase isozyme 1 OS=Gossypium hirsutum OX=3635 GN=CAT1 PE=2 SV=2 && PF00199:Catalase|PF06628:Catalase-related immune-responsive	Catalase
CSS0036685	1536.24	1338.96	1345.77	33.109	35.2316	47.9191	1406.99	38.7532	5.18681	8.46123e-230	7.15928e-228	CSS0036685	Chr10	87379363	87391845	+	4428	protein_coding	- && sp|Q7PC87|AB34G_ARATH ABC transporter G family member 34 OS=Arabidopsis thaliana OX=3702 GN=ABCG34 PE=2 SV=1 && PF00005:ABC transporter|PF08370:Plant PDR ABC transporter associated|PF01061:ABC-2 type transporter|PF14510:ABC-transporter N-terminal	ABC2_membrane
CSS0045500	5744.59	5704.84	5580.14	2277.16	2316.71	2287.4	5676.52	2293.76	1.30721	9.26155e-230	7.82042e-228	CSS0045500	Contig331	211005	231110	+	3125	protein_coding	- && sp|Q1KPV0|FZL_ARATH Probable transmembrane GTPase FZO-like, chloroplastic OS=Arabidopsis thaliana OX=3702 GN=FZL PE=1 SV=1 && PF01926:50S ribosome-binding GTPase	-
CSS0024951	1248.26	1319.57	1372.69	58.8605	70.4632	50.8529	1313.51	60.0589	4.44977	6.96919e-229	5.87275e-227	CSS0024951	Chr8	25194415	25201714	+	1620	protein_coding	- && sp|F4JIP9|TAUE5_ARATH Sulfite exporter TauE/SafE family protein 5 OS=Arabidopsis thaliana OX=3702 GN=At4g21250 PE=2 SV=1 && PF01925:Sulfite exporter TauE/SafE	-
CSS0008715	1425.86	1344.66	1360.19	111.283	120.93	107.574	1376.91	113.262	3.60364	1.65118e-228	1.38858e-226	CSS0008715	Chr15	107239032	107244307	+	1779	protein_coding	- && sp|H2DH18|C7A12_PANGI Cytochrome P450 CYP736A12 OS=Panax ginseng OX=4054 PE=2 SV=1 && PF00067:Cytochrome P450	p450
CSS0011954	60.2053	50.1825	82.6688	1421.85	1424.5	1360.32	64.3522	1402.22	-4.43128	1.16165e-227	9.7491e-226	CSS0011954	Chr4	10671712	10677201	-	3114	protein_coding	- && sp|Q9SCV9|BGAL3_ARATH Beta-galactosidase 3 OS=Arabidopsis thaliana OX=3702 GN=BGAL3 PE=2 SV=1 && PF01301:Glycosyl hydrolases family 35|PF17834:Beta-sandwich domain in beta galactosidase	-
CSS0007721	5201.74	4673.82	5181.22	1387.82	1449.26	1534.39	5018.92	1457.15	1.78514	1.21343e-227	1.0163e-225	CSS0007721	Chr8	145906728	145908238	+	638	protein_coding	- && sp|Q9SUI5|PSAK_ARATH Photosystem I reaction center subunit psaK, chloroplastic OS=Arabidopsis thaliana OX=3702 GN=PSAK PE=2 SV=2 && PF01241:Photosystem I psaG / psaK	-
CSS0032573	10871.1	10562.3	10583.5	5275.37	5162.85	5389.43	10672.3	5275.89	1.01652	1.4429e-227	1.20605e-225	CSS0032573	Chr1	173900738	173902166	+	1029	protein_coding	- && sp|P40267|H1_SOLPN Histone H1 OS=Solanum pennellii OX=28526 PE=2 SV=1 && PF00538:linker histone H1 and H5 family	-
CSS0013005	53.1813	42.1989	34.6055	1359.31	1331.18	1415.08	43.3286	1368.52	-4.98333	2.00812e-226	1.67509e-224	CSS0013005	Contig740	90830	95371	-	1036	protein_coding	- && - && PF04749:PLAC8 family	-
CSS0047570	19.065	15.9672	17.3028	2046.32	2042.48	2018.47	17.445	2035.76	-6.86203	4.63608e-226	3.85944e-224	CSS0047570	Chr8	136529835	136553992	-	2439	protein_coding	- && sp|C0LGE0|Y1765_ARATH Probable LRR receptor-like serine/threonine-protein kinase At1g07650 OS=Arabidopsis thaliana OX=3702 GN=At1g07650 PE=1 SV=1 && PF11721:Malectin domain|PF07714:Protein tyrosine kinase	Pkinase_Tyr
CSS0012474	9481.33	9378.43	9211.8	4635.26	4523.93	4593.39	9357.19	4584.19	1.02929	6.23049e-226	5.17632e-224	CSS0012474	Chr5	178177901	178184514	-	2269	protein_coding	- && sp|Q9LUV4|FRL4A_ARATH FRIGIDA-like protein 4a OS=Arabidopsis thaliana OX=3702 GN=FRL4A PE=2 SV=1 && PF07899:Frigida-like protein	-
CSS0041350	758.587	724.225	679.615	2940.26	2934.7	2868.3	720.809	2914.42	-2.01619	7.20369e-226	5.97284e-224	CSS0041350	Chr11	74103486	74107102	+	3617	protein_coding	- && sp|Q9FGH9|E70B1_ARATH Exocyst complex component EXO70B1 OS=Arabidopsis thaliana OX=3702 GN=EXO70B1 PE=1 SV=1 && -	-
novel.8114	151.517	241.789	207.633	2024.25	2165.31	2102.57	200.313	2097.38	-3.39417	1.35154e-225	1.11837e-223	-	Chr9	45680941	45682341	-	1131	-	- && - && -	-
CSS0049096	89.3045	54.7446	69.2111	1460.48	1358.8	1402.37	71.0867	1407.21	-4.29751	2.31245e-225	1.90967e-223	CSS0049096	Chr14	20661540	20665492	+	3297	protein_coding	- && sp|Q9FII5|TDR_ARATH Leucine-rich repeat receptor-like protein kinase TDR OS=Arabidopsis thaliana OX=3702 GN=TDR PE=1 SV=1 && PF13855:Leucine rich repeat|PF00069:Protein kinase domain	Pkinase
CSS0025532	687.344	588.504	670.963	3012	2899.46	2849.72	648.937	2920.39	-2.16751	4.1039e-225	3.38231e-223	CSS0025532	Chr4	27657100	27674067	+	2617	protein_coding	- && sp|Q56X46|MSL2_ARATH Mechanosensitive ion channel protein 2, chloroplastic OS=Arabidopsis thaliana OX=3702 GN=MSL2 PE=2 SV=1 && PF00924:Mechanosensitive ion channel	-
CSS0006328	4172.23	3858.35	3591.29	704.486	694.157	844.941	3873.96	747.862	2.37362	4.66684e-225	3.83862e-223	CSS0006328	Chr7	24009298	24014426	+	1553	protein_coding	- && - && PF04117:Mpv17 / PMP22 family	Mpv17_PMP22
novel.4737	64.219	70.7117	85.5526	1431.05	1440.69	1295.77	73.4944	1389.17	-4.23643	1.56761e-224	1.28684e-222	-	Chr3	179098045	179101402	-	2047	-	- && sp|Q9SUP6|WRK53_ARATH Probable WRKY transcription factor 53 OS=Arabidopsis thaliana OX=3702 GN=WRKY53 PE=1 SV=1 && PF03106:WRKY DNA -binding domain	WRKY
CSS0048037	562.919	549.727	514.277	2783.92	2746.16	2500.59	542.308	2676.89	-2.30436	2.00617e-224	1.64359e-222	CSS0048037	Chr11	87571534	87576335	+	2175	protein_coding	- && sp|Q9FNL7|PTR3_ARATH Protein NRT1/ PTR FAMILY 5.2 OS=Arabidopsis thaliana OX=3702 GN=NPF5.2 PE=2 SV=1 && PF00854:POT family	-
CSS0021578	1513.16	1567.06	1465.93	171.983	175.206	157.448	1515.38	168.212	3.17021	1.20097e-223	9.81964e-222	CSS0021578	Contig61	795214	800947	-	3660	protein_coding	- && - && -	-
CSS0034327	2084.11	2108.81	2090.75	5223.87	5342.82	5249.59	2094.55	5272.09	-1.33188	1.41705e-223	1.15635e-221	CSS0034327	Chr4	26044452	26055218	-	2305	protein_coding	- && sp|Q9T074|PCKA1_ARATH Phosphoenolpyruvate carboxykinase (ATP) 1 OS=Arabidopsis thaliana OX=3702 GN=PCK1 PE=1 SV=1 && PF01293:Phosphoenolpyruvate carboxykinase	-
CSS0048275	203.695	190.466	220.13	1762.14	1613.99	1719.22	204.763	1698.45	-3.04892	1.63392e-223	1.33069e-221	CSS0048275	Chr4	134822513	134824022	-	1510	protein_coding	- && - && -	-
CSS0027106	3231.02	3158.08	3134.69	936.249	913.164	925.132	3174.59	924.849	1.77922	1.66845e-223	1.35614e-221	CSS0027106	Chr10	124800463	124811676	-	2259	protein_coding	- && sp|Q9LSL5|LRK92_ARATH L-type lectin-domain containing receptor kinase IX.2 OS=Arabidopsis thaliana OX=3702 GN=LECRK92 PE=1 SV=1 && PF00139:Legume lectin domain|PF00069:Protein kinase domain	Pkinase
CSS0033573	84.2874	104.927	82.6688	1443	1320.71	1383.79	90.6278	1382.5	-3.93926	8.4205e-223	6.83087e-221	CSS0033573	Chr3	19121156	19122854	+	1699	protein_coding	- && sp|Q9AT54|SCGT_TOBAC Scopoletin glucosyltransferase OS=Nicotiana tabacum OX=4097 GN=TOGT1 PE=1 SV=1 && PF00201:UDP-glucoronosyl and UDP-glucosyl transferase	UDPGT
CSS0001631	2505.54	2461.22	2425.27	574.809	516.095	550.581	2464.01	547.162	2.1706	1.7188e-221	1.38887e-219	CSS0001631	Chr14	42549193	42555299	+	1789	protein_coding	- && sp|Q9LVS0|KUA1_ARATH Transcription factor KUA1 OS=Arabidopsis thaliana OX=3702 GN=KUA1 PE=1 SV=1 && PF00249:Myb-like DNA-binding domain	Myb_DNA-binding
CSS0017825	1239.23	1468.98	1375.57	70.8165	49.5147	63.5662	1361.26	61.2991	4.47088	6.7397e-221	5.43533e-219	CSS0017825	Chr8	83813639	83814753	+	1115	protein_coding	- && sp|P27495|CB24_TOBAC Chlorophyll a-b binding protein 40, chloroplastic OS=Nicotiana tabacum OX=4097 GN=CAB40 PE=2 SV=1 && PF00504:Chlorophyll A-B binding protein	-
CSS0016747	12.0411	31.9343	15.3802	1976.42	1862.51	1797.46	19.7852	1878.8	-6.60826	7.26643e-221	5.8487e-219	CSS0016747	Chr4	182554491	182561039	-	2043	protein_coding	- && sp|Q7XJR2|ANTR3_ARATH Probable anion transporter 3, chloroplastic OS=Arabidopsis thaliana OX=3702 GN=ANTR3 PE=2 SV=2 && PF07690:Major Facilitator Superfamily	MFS_1
CSS0013229	3247.07	3256.16	3166.41	884.747	957.918	899.706	3223.21	914.123	1.81801	1.42406e-220	1.14399e-218	CSS0013229	Chr5	57361535	57374233	+	2494	protein_coding	- && sp|F4IFC5|SYTM2_ARATH Threonine--tRNA ligase, chloroplastic/mitochondrial 2 OS=Arabidopsis thaliana OX=3702 GN=EMB2761 PE=2 SV=1 && PF03129:Anticodon binding domain|PF07973:Threonyl and Alanyl tRNA synthetase second additional domain|PF00587:tRNA synthetase class II core domain (G, H, P, S and T)	tRNA-synt_2b
CSS0013458	1239.23	1182.71	1309.24	39.5469	41.897	47.9191	1243.73	43.121	4.85293	8.93582e-220	7.16445e-218	CSS0013458	Chr5	80807635	80808326	+	692	protein_coding	- && sp|Q1G3I2|MIP1A_ARATH B-box domain protein 30 OS=Arabidopsis thaliana OX=3702 GN=MIP1A PE=1 SV=1 && -	-
CSS0002240	1328.53	1269.39	1312.13	101.166	112.36	97.7941	1303.35	103.774	3.65076	1.32411e-219	1.05957e-217	CSS0002240	Chr8	21134612	21137945	+	1887	protein_coding	- && sp|O65468|CRK8_ARATH Cysteine-rich receptor-like protein kinase 8 OS=Arabidopsis thaliana OX=3702 GN=CRK8 PE=3 SV=2 && PF01657:Salt stress response/antifungal|PF07714:Protein tyrosine kinase	Pkinase_Tyr
CSS0023626	6065.68	6151.92	6002.14	2383.85	2193.88	2400.84	6073.25	2326.19	1.38436	1.59994e-219	1.27781e-217	CSS0023626	Contig1007	503231	538328	-	4292	protein_coding	- && sp|Q43846|SSY3_SOLTU Soluble starch synthase 3, chloroplastic/amyloplastic OS=Solanum tuberosum OX=4113 GN=SS3 PE=1 SV=1 && PF08323:Starch synthase catalytic domain|PF00534:Glycosyl transferases group 1|PF16760:Starch/carbohydrate-binding module (family 53)	Glycos_transf_1
CSS0007314	304.037	329.608	331.637	2089.55	1909.17	1961.75	321.76	1986.82	-2.62698	3.28411e-219	2.61784e-217	CSS0007314	Chr15	5252603	5257972	-	2224	protein_coding	- && sp|Q43111|PME3_PHAVU Pectinesterase 3 OS=Phaseolus vulgaris OX=3885 GN=MPE3 PE=2 SV=1 && PF01095:Pectinesterase|PF04043:Plant invertase/pectin methylesterase inhibitor	-
CSS0046595	2892.86	2799.96	2876.11	767.945	750.337	704.117	2856.31	740.8	1.94672	7.7494e-219	6.16532e-217	CSS0046595	Chr2	89148033	89168376	-	1571	protein_coding	- && sp|Q9SS90|RGLG1_ARATH E3 ubiquitin-protein ligase RGLG1 OS=Arabidopsis thaliana OX=3702 GN=RGLG1 PE=1 SV=1 && PF07002:Copine	-
CSS0042150	49.1676	34.2154	61.521	1412.65	1300.71	1327.07	48.3013	1346.81	-4.78314	1.57242e-218	1.24859e-216	CSS0042150	Chr9	92911209	92912591	-	1383	protein_coding	- && sp|Q9SJY5|PUMP5_ARATH Mitochondrial uncoupling protein 5 OS=Arabidopsis thaliana OX=3702 GN=PUMP5 PE=2 SV=1 && PF00153:Mitochondrial carrier protein	Mito_carr
CSS0015733	540.844	583.942	571.953	2691.95	2549.05	2885.9	565.58	2708.97	-2.26056	1.62275e-218	1.28609e-216	CSS0015733	Chr7	86077976	86097505	+	1696	protein_coding	- && - && PF07690:Major Facilitator Superfamily	MFS_1
CSS0046011	1782.08	1707.35	1914.84	245.559	267.57	249.375	1801.42	254.168	2.82607	2.05732e-218	1.62737e-216	CSS0046011	Chr2	55197287	55201546	+	2782	protein_coding	- && sp|F4KGY6|RVE1_ARATH Protein REVEILLE 1 OS=Arabidopsis thaliana OX=3702 GN=RVE1 PE=1 SV=1 && PF00249:Myb-like DNA-binding domain	Myb_DNA-binding
CSS0029596	117.4	165.374	98.0491	1711.55	1804.43	1671.3	126.941	1729.09	-3.78133	2.11501e-218	1.66981e-216	CSS0029596	Contig294	237534	243644	+	3790	protein_coding	- && sp|Q5JL96|ZFP34_ORYSJ Probable E3 ubiquitin-protein ligase RZFP34 OS=Oryza sativa subsp. japonica OX=39947 GN=RZFP34 PE=2 SV=1 && PF05495:CHY zinc finger|PF14599:Zinc-ribbon|PF13639:Ring finger domain	zf-CHY
CSS0002306	203.695	160.812	180.718	1652.69	1685.4	1567.64	181.742	1635.24	-3.16564	2.67095e-218	2.1047e-216	CSS0002306	Chr4	155629407	155634833	-	1598	protein_coding	- && sp|Q39023|MPK3_ARATH Mitogen-activated protein kinase 3 OS=Arabidopsis thaliana OX=3702 GN=MPK3 PE=1 SV=2 && PF00069:Protein kinase domain	Pkinase
CSS0034336	1231.2	1435.9	1376.53	72.6559	81.8896	89.9706	1347.88	81.5054	4.04933	3.38306e-218	2.66076e-216	CSS0034336	Chr5	128236393	128241447	+	1362	protein_coding	- && sp|Q9SLN8|DBR_TOBAC 2-alkenal reductase (NADP(+)-dependent) OS=Nicotiana tabacum OX=4097 GN=DBR PE=1 SV=1 && PF16884:N-terminal domain of oxidoreductase|PF00107:Zinc-binding dehydrogenase	ADH_zinc_N
CSS0003991	108.37	119.754	115.352	1362.99	1324.52	1346.62	114.492	1344.71	-3.55579	2.00815e-217	1.5764e-215	CSS0003991	Chr1	202908361	202913980	-	1375	protein_coding	- && sp|Q0JKZ0|SNL6_ORYSJ Cinnamoyl-CoA reductase-like SNL6 OS=Oryza sativa subsp. japonica OX=39947 GN=SNL6 PE=3 SV=1 && PF01073:3-beta hydroxysteroid dehydrogenase/isomerase family	-
novel.6183	3147.73	2998.41	3039.52	788.179	683.683	772.573	3061.89	748.145	2.03301	2.6653e-217	2.08829e-215	-	Chr6	55320033	55351060	+	1601	-	- && - && -	-
CSS0024199	1437.9	1405.11	1416.9	24.8318	19.0441	23.4706	1419.97	22.4488	5.98207	6.98611e-217	5.46332e-215	CSS0024199	Chr13	120013707	120017586	-	1068	protein_coding	- && - && -	-
CSS0020071	3609.31	3609.72	3432.68	1007.07	1092.18	1002.39	3550.57	1033.88	1.77975	1.99225e-216	1.55504e-214	CSS0020071	Chr8	43575674	43583270	-	2842	protein_coding	- && sp|O23661|ARFC_ARATH Auxin response factor 3 OS=Arabidopsis thaliana OX=3702 GN=ARF3 PE=1 SV=2 && PF06507:Auxin response factor|PF02362:B3 DNA binding domain	Auxin_resp
novel.2346	8651.5	9130.94	9483.84	18488.6	18710.8	17981.4	9088.76	18393.6	-1.01699	2.85237e-216	2.22222e-214	-	Chr13	51629460	51682770	-	1264	-	- && - && -	-
CSS0036598	71.2429	77.5548	85.5526	1319.76	1261.67	1251.76	78.1168	1277.73	-4.03014	3.16874e-216	2.46404e-214	CSS0036598	Chr4	28114842	28116628	+	1787	protein_coding	- && sp|Q9SJY5|PUMP5_ARATH Mitochondrial uncoupling protein 5 OS=Arabidopsis thaliana OX=3702 GN=PUMP5 PE=2 SV=1 && PF00153:Mitochondrial carrier protein	Mito_carr
CSS0020980	1194.07	1198.68	1143.91	3671.42	3603.14	3713.24	1178.89	3662.6	-1.63606	7.06067e-216	5.48011e-214	CSS0020980	Chr1	192745927	192751242	+	1070	protein_coding	- && sp|P22335|HSF24_SOLPE Heat shock factor protein HSF24 OS=Solanum peruvianum OX=4082 GN=HSF24 PE=2 SV=1 && PF00447:HSF-type DNA-binding	HSF_DNA-bind
CSS0011322	5375.33	5662.64	5392.7	2114.38	1997.73	2112.35	5476.89	2074.82	1.39999	2.17036e-215	1.68136e-213	CSS0011322	Chr2	212164946	212181121	+	5400	protein_coding	- && sp|Q9LUM0|FAB1B_ARATH 1-phosphatidylinositol-3-phosphate 5-kinase FAB1B OS=Arabidopsis thaliana OX=3702 GN=FAB1B PE=2 SV=1 && PF00118:TCP-1/cpn60 chaperonin family|PF01363:FYVE zinc finger|PF01504:Phosphatidylinositol-4-phosphate 5-Kinase	PIP5K
CSS0027665	3004.24	2818.21	2736.72	595.962	536.091	644.463	2853.06	592.172	2.26879	4.06714e-215	3.14487e-213	CSS0027665	Chr5	26760484	26769517	+	2664	protein_coding	- && sp|Q9LJR3|SPA3_ARATH Protein SPA1-RELATED 3 OS=Arabidopsis thaliana OX=3702 GN=SPA3 PE=1 SV=1 && -	-
CSS0038121	668.279	658.075	656.544	2648.72	2579.52	2586.65	660.966	2604.97	-1.97862	5.29646e-215	4.08778e-213	CSS0038121	Chr3	121354259	121369500	+	3825	protein_coding	- && sp|Q941L0|CESA3_ARATH Cellulose synthase A catalytic subunit 3 [UDP-forming] OS=Arabidopsis thaliana OX=3702 GN=CESA3 PE=1 SV=2 && PF14569:Zinc-binding RING-finger|PF03552:Cellulose synthase	-
CSS0027978	1932.59	1910.36	2045.57	274.989	239.003	194.61	1962.84	236.201	3.05279	9.15558e-215	7.05304e-213	CSS0027978	Chr14	51850710	51853170	-	956	protein_coding	- && sp|Q9LN77|P2A12_ARATH F-box protein PP2-A12 OS=Arabidopsis thaliana OX=3702 GN=P2A12 PE=2 SV=1 && PF14299:Phloem protein 2	-
CSS0043659	178.609	207.573	156.686	1756.62	1637.79	1614.58	180.956	1669.66	-3.21264	1.18447e-214	9.10759e-213	CSS0043659	Chr12	81784466	81790715	-	1481	protein_coding	- && sp|Q9CAR7|HIR2_ARATH Hypersensitive-induced response protein 2 OS=Arabidopsis thaliana OX=3702 GN=HIR2 PE=1 SV=1 && PF01145:SPFH domain / Band 7 family	-
CSS0032127	2659.07	2584.4	2605.99	611.597	603.698	669.89	2616.49	628.395	2.05853	1.33902e-214	1.02769e-212	CSS0032127	Chr2	25471115	25478092	+	1852	protein_coding	- && sp|P50433|GLYM_SOLTU Serine hydroxymethyltransferase, mitochondrial OS=Solanum tuberosum OX=4113 PE=2 SV=1 && PF00464:Serine hydroxymethyltransferase	SHMT
CSS0033126	1471.02	1522.58	1480.35	194.056	175.206	178.963	1491.32	182.742	3.02773	2.6067e-214	1.99691e-212	CSS0033126	Chr1	98949739	98960348	+	1917	protein_coding	- && sp|Q9ZNX9|SIGE_ARATH RNA polymerase sigma factor sigE, chloroplastic/mitochondrial OS=Arabidopsis thaliana OX=3702 GN=SIGE PE=1 SV=1 && PF04542:Sigma-70 region 2|PF04545:Sigma-70, region 4|PF04539:Sigma-70 region 3	Sigma70_r4
CSS0013331	1395.76	1450.73	1522.64	108.524	116.169	147.669	1456.38	124.121	3.55542	4.36537e-214	3.33798e-212	CSS0013331	Chr2	159563144	159564975	+	920	protein_coding	- && sp|Q9FGT8|TIL_ARATH Temperature-induced lipocalin-1 OS=Arabidopsis thaliana OX=3702 GN=TIL PE=1 SV=1 && PF08212:Lipocalin-like domain	Lipocalin_2
CSS0002126	42.1437	57.0256	76.9012	1328.96	1329.28	1330	58.6902	1329.41	-4.49534	9.1406e-214	6.97642e-212	CSS0002126	Chr6	47575873	47579679	-	3403	protein_coding	- && sp|P47735|RLK5_ARATH Receptor-like protein kinase 5 OS=Arabidopsis thaliana OX=3702 GN=RLK5 PE=1 SV=1 && PF00069:Protein kinase domain	Pkinase
CSS0036810	1557.31	1562.5	1601.47	12.8757	18.0919	24.4485	1573.76	18.472	6.42136	9.24791e-214	7.0453e-212	CSS0036810	Chr14	25811412	25813738	-	1646	protein_coding	- && sp|A0A2R6Q326|AT16_ACTCC Alcohol acyltransferase 16 OS=Actinidia chinensis var. chinensis OX=1590841 GN=AT16 PE=1 SV=2 && PF02458:Transferase family	-
CSS0019061	1458.97	1430.2	1544.75	4384.19	4308.73	4236.44	1477.98	4309.78	-1.54304	1.31661e-213	1.00118e-211	CSS0019061	Chr4	33906830	33914617	-	1841	protein_coding	- && sp|Q9Y7K5|YGI3_SCHPO Uncharacterized WD repeat-containing protein C2A9.03 OS=Schizosaccharomyces pombe (strain 972 / ATCC 24843) OX=284812 GN=SPBC2A9.03 PE=4 SV=2 && -	-
CSS0031491	2406.2	2419.03	2582.92	569.291	517.999	515.375	2469.38	534.222	2.20831	8.50286e-213	6.45389e-211	CSS0031491	Chr7	33587239	33591611	-	1748	protein_coding	- && sp|H2DH21|C7A29_PANGI Cytochrome P450 CYP72A219 OS=Panax ginseng OX=4054 PE=2 SV=1 && PF00067:Cytochrome P450	p450
CSS0045660	2173.41	2148.72	2214.76	5505.29	5417.09	5297.51	2178.96	5406.63	-1.31078	1.16324e-212	8.8131e-211	CSS0045660	Chr15	65862129	65866322	+	2742	protein_coding	- && sp|Q8VY13|FRO8_ARATH Ferric reduction oxidase 8, mitochondrial OS=Arabidopsis thaliana OX=3702 GN=FRO8 PE=1 SV=1 && PF01794:Ferric reductase like transmembrane component|PF08030:Ferric reductase NAD binding domain|PF08022:FAD-binding domain	Ferric_reduct
CSS0040374	254.869	236.086	264.348	1830.19	1772.05	1670.32	251.768	1757.52	-2.80095	1.19009e-211	8.99997e-210	CSS0040374	Chr6	142000922	142009731	+	2430	protein_coding	- && sp|Q9M1S3|ARP1_ARATH Probable RNA-binding protein ARP1 OS=Arabidopsis thaliana OX=3702 GN=ARP1 PE=2 SV=1 && PF00076:RNA recognition motif. (a.k.a. RRM, RBD, or RNP domain)	RRM_1
novel.4366	1205.11	1169.02	1169.86	41.3863	58.0845	57.6985	1181.33	52.3898	4.49874	2.07149e-211	1.56369e-209	-	Chr3	177243687	177270377	+	3389	-	- && - && -	-
CSS0016601	5850.95	5922.68	5862.76	2513.53	2574.76	2552.43	5878.8	2546.9	1.20676	2.4224e-211	1.82524e-209	CSS0016601	Chr14	64936683	64958371	-	2406	protein_coding	- && sp|Q9T0A0|LACS4_ARATH Long chain acyl-CoA synthetase 4 OS=Arabidopsis thaliana OX=3702 GN=LACS4 PE=2 SV=1 && PF00501:AMP-binding enzyme	AMP-binding
CSS0013799	465.588	500.685	465.252	2192.55	2340.52	2356.84	477.175	2296.64	-2.26841	1.20052e-210	9.01288e-209	CSS0013799	Chr11	48367414	48376861	+	1648	protein_coding	- && sp|Q7TMR0|PCP_MOUSE Lysosomal Pro-X carboxypeptidase OS=Mus musculus OX=10090 GN=Prcp PE=1 SV=2 && PF05577:Serine carboxypeptidase S28	Peptidase_S28
CSS0040931	1308.46	1226.05	1387.11	69.8968	93.3161	91.9264	1307.21	85.0464	3.94538	2.95612e-210	2.21526e-208	CSS0040931	Chr6	77805043	77808180	+	1740	protein_coding	- && - && -	-
CSS0014110	1169.99	1173.59	1259.26	54.262	59.0367	39.1176	1200.94	50.8054	4.56026	3.51516e-210	2.62943e-208	CSS0014110	Chr15	100165011	100166091	-	1081	protein_coding	- && sp|Q8LDR0|DOF54_ARATH Dof zinc finger protein DOF5.4 OS=Arabidopsis thaliana OX=3702 GN=DOF5.4 PE=2 SV=2 && PF02701:Dof domain, zinc finger	zf-Dof
CSS0006843	542.851	566.834	572.914	2457.42	2371.94	2366.62	560.867	2398.66	-2.09669	5.02721e-210	3.75368e-208	CSS0006843	Chr6	36937501	36943191	-	2717	protein_coding	- && sp|Q9S7Z8|PIN3_ARATH Auxin efflux carrier component 3 OS=Arabidopsis thaliana OX=3702 GN=PIN3 PE=1 SV=1 && PF03547:Membrane transport protein	-
CSS0033536	23.0787	9.1241	25.9542	1804.44	1589.23	1724.11	19.3856	1705.93	-6.42442	6.01537e-210	4.48341e-208	CSS0033536	Chr13	97457547	97458002	+	456	protein_coding	- && sp|Q9FE06|EXOL2_ARATH Protein EXORDIUM-like 2 OS=Arabidopsis thaliana OX=3702 GN=EXL2 PE=2 SV=1 && PF04674:Phosphate-induced protein 1 conserved region	-
CSS0001512	1509.15	1393.71	1411.14	4245.31	4141.14	4285.34	1438	4223.93	-1.55398	7.23703e-210	5.38422e-208	CSS0001512	Chr7	171317268	171324151	-	2592	protein_coding	- && sp|Q9CAD5|YODA_ARATH Mitogen-activated protein kinase kinase kinase YODA OS=Arabidopsis thaliana OX=3702 GN=YDA PE=1 SV=1 && PF00069:Protein kinase domain	Pkinase
CSS0045805	1812.18	1802.01	1887.92	4864.27	4724.84	4812.45	1834.04	4800.52	-1.38762	4.18042e-209	3.10457e-207	CSS0045805	Chr8	128147298	128149860	+	1564	protein_coding	- && sp|Q84WQ5|CBSX5_ARATH CBS domain-containing protein CBSX5 OS=Arabidopsis thaliana OX=3702 GN=CBSX5 PE=2 SV=2 && -	-
CSS0020575	40.1369	61.5876	77.8625	5083.15	5100.96	4915.13	59.8623	5033.08	-6.39174	5.75577e-209	4.26682e-207	CSS0020575	Chr8	101120152	101121756	+	1572	protein_coding	- && sp|Q9SA85|BBE8_ARATH Berberine bridge enzyme-like 8 OS=Arabidopsis thaliana OX=3702 GN=At1g30700 PE=2 SV=1 && PF08031:Berberine and berberine like|PF01565:FAD binding domain	FAD_binding_4
CSS0034174	4585.64	4697.77	4716.93	1613.14	1761.58	1670.32	4666.78	1681.68	1.47267	3.82627e-208	2.83137e-206	CSS0034174	Chr4	155667528	155670630	-	963	protein_coding	- && sp|P48534|APX1_PEA L-ascorbate peroxidase, cytosolic OS=Pisum sativum OX=3888 GN=APX1 PE=1 SV=2 && PF00141:Peroxidase	-
CSS0031769	6337.61	6368.62	6808.64	2374.65	2458.59	2193.52	6504.96	2342.26	1.47363	1.02761e-207	7.5905e-206	CSS0031769	Chr6	8758413	8759288	-	876	protein_coding	- && - && -	-
CSS0007488	155.53	108.349	141.306	1453.12	1466.4	1500.16	135.062	1473.22	-3.43932	1.13801e-207	8.39098e-206	CSS0007488	Contig1051	44453	49027	+	929	protein_coding	- && sp|Q9SD84|PDCB2_ARATH PLASMODESMATA CALLOSE-BINDING PROTEIN 2 OS=Arabidopsis thaliana OX=3702 GN=PDCB2 PE=1 SV=1 && PF07983:X8 domain	-
CSS0042146	12.0411	14.8267	27.8767	1649.93	1730.16	1696.73	18.2481	1692.27	-6.51424	1.36349e-207	1.00356e-205	CSS0042146	Chr6	59719485	59719661	-	177	protein_coding	- && sp|Q6IM91|DVL10_ARATH Small polypeptide DEVIL 10 OS=Arabidopsis thaliana OX=3702 GN=DVL10 PE=3 SV=1 && -	-
CSS0001568	7161.42	6879.57	6999.93	2684.59	2910.89	2948.49	7013.64	2847.99	1.3007	4.28991e-207	3.15186e-205	CSS0001568	Chr12	144259744	144265531	+	1331	protein_coding	- && sp|Q8H112|PGL1A_ARATH PGR5-like protein 1A, chloroplastic OS=Arabidopsis thaliana OX=3702 GN=PGRL1A PE=1 SV=1 && -	-
CSS0045576	2212.54	2198.91	2340.68	407.425	317.084	320.765	2250.71	348.425	2.69013	4.59278e-207	3.36839e-205	CSS0045576	Chr14	95176784	95179646	+	1170	protein_coding	- && sp|O49523|DSEL_ARATH Phospholipase A1-IIgamma OS=Arabidopsis thaliana OX=3702 GN=DSEL PE=1 SV=1 && PF01764:Lipase (class 3)	Lipase_3
CSS0047444	499.704	591.926	634.435	2813.35	2849	2995.43	575.355	2885.93	-2.32631	9.72062e-207	7.11656e-205	CSS0047444	Chr11	95965928	95969682	+	1739	protein_coding	- && sp|Q570C0|TIR1_ARATH Protein TRANSPORT INHIBITOR RESPONSE 1 OS=Arabidopsis thaliana OX=3702 GN=TIR1 PE=1 SV=2 && PF18791:Transport inhibitor response 1 protein domain|PF18511:F-box	-
CSS0046379	1420.84	1482.67	1513.99	188.537	193.298	183.853	1472.5	188.563	2.96499	1.03854e-206	7.58978e-205	CSS0046379	Chr2	72999454	73000911	+	1458	protein_coding	- && sp|Q8LDR0|DOF54_ARATH Dof zinc finger protein DOF5.4 OS=Arabidopsis thaliana OX=3702 GN=DOF5.4 PE=2 SV=2 && PF02701:Dof domain, zinc finger	zf-Dof
CSS0036566	1205.11	1184.99	1347.69	84.6119	68.5587	77.2573	1245.93	76.8093	4.01928	2.71345e-206	1.97953e-204	CSS0036566	Chr15	19514563	19515973	+	1411	protein_coding	- && - && PF07911:Protein of unknown function (DUF1677)	-
CSS0027229	72.2463	45.6205	70.1724	1273.78	1220.73	1246.87	62.6797	1247.13	-4.30049	3.62361e-206	2.63885e-204	CSS0027229	Chr5	82714517	82729485	+	1981	protein_coding	- && sp|Q672F7|TPS2_LOTJA Tricyclene synthase EBOS, chloroplastic OS=Lotus japonicus OX=34305 GN=EBOS PE=1 SV=1 && PF03936:Terpene synthase family, metal binding domain|PF01397:Terpene synthase, N-terminal domain	-
CSS0001358	1226.18	1303.61	1208.31	91.9695	100.934	106.596	1246.03	99.8329	3.64261	3.72002e-206	2.70428e-204	CSS0001358	Chr3	161045443	161047964	-	1504	protein_coding	- && sp|K4BW79|ENOX_SOLLC 2-methylene-furan-3-one reductase OS=Solanum lycopersicum OX=4081 GN=EO PE=1 SV=1 && PF08240:Alcohol dehydrogenase GroES-like domain|PF13602:Zinc-binding dehydrogenase	ADH_N
CSS0018657	1615.51	1482.67	1528.41	4694.12	4442.04	4430.07	1542.2	4522.08	-1.5514	9.22787e-206	6.69645e-204	CSS0018657	Chr6	154489725	154496273	-	2531	protein_coding	- && sp|Q38890|GUN25_ARATH Endoglucanase 25 OS=Arabidopsis thaliana OX=3702 GN=KOR PE=1 SV=1 && PF00759:Glycosyl hydrolase family 9	-
CSS0007633	2953.07	2960.77	3073.16	794.616	796.043	696.294	2995.67	762.318	1.97392	1.0635e-205	7.70401e-204	CSS0007633	Chr7	74522534	74533416	+	1867	protein_coding	- && sp|H2DH21|C7A29_PANGI Cytochrome P450 CYP72A219 OS=Panax ginseng OX=4054 PE=2 SV=1 && PF00067:Cytochrome P450	p450
CSS0029116	22.0753	41.0584	38.4506	1258.14	1393.08	1290.88	33.8614	1314.03	-5.28648	1.218e-205	8.80778e-204	CSS0029116	Chr15	36906096	36909102	+	1758	protein_coding	- && sp|Q9SAH7|WRK40_ARATH Probable WRKY transcription factor 40 OS=Arabidopsis thaliana OX=3702 GN=WRKY40 PE=1 SV=1 && PF03106:WRKY DNA -binding domain	WRKY
CSS0005646	70.2395	70.7117	74.0174	1257.22	1182.64	1173.53	71.6562	1204.46	-4.0702	1.39499e-205	1.007e-203	CSS0005646	Chr1	191032302	191034074	-	1773	protein_coding	- && sp|O23160|MYB73_ARATH Transcription factor MYB73 OS=Arabidopsis thaliana OX=3702 GN=MYB73 PE=1 SV=1 && PF13921:Myb-like DNA-binding domain	-
CSS0027466	29.0992	57.0256	39.4119	1299.53	1221.68	1308.48	41.8456	1276.56	-4.94975	1.41003e-205	1.01608e-203	CSS0027466	Contig1183	1368079	1371737	+	993	protein_coding	- && sp|A3F5F0|SDH_SINHE Secoisolariciresinol dehydrogenase OS=Sinopodophyllum hexandrum OX=93608 GN=SDH PE=1 SV=1 && PF13561:Enoyl-(Acyl carrier protein) reductase	-
CSS0046427	8006.3	8067.98	7862.19	3928.94	3920.23	3901.01	7978.82	3916.72	1.02633	6.32067e-205	4.54681e-203	CSS0046427	Chr3	44093375	44100681	-	2772	protein_coding	- && sp|Q02028|HSP7S_PEA Stromal 70 kDa heat shock-related protein, chloroplastic OS=Pisum sativum OX=3888 GN=HSP70 PE=2 SV=1 && PF00012:Hsp70 protein	HSP70
CSS0012613	3832.07	3796.76	3802.77	1350.11	1301.66	1359.34	3810.53	1337.04	1.511	2.12832e-204	1.52836e-202	CSS0012613	Chr14	62255000	62261730	-	4428	protein_coding	- && sp|Q9LYS2|AB10C_ARATH ABC transporter C family member 10 OS=Arabidopsis thaliana OX=3702 GN=ABCC10 PE=2 SV=2 && PF00005:ABC transporter|PF00664:ABC transporter transmembrane region	ABC_membrane
CSS0003328	557.902	524.636	531.58	2461.1	2294.81	2349.99	538.039	2368.64	-2.1378	3.25008e-204	2.32984e-202	CSS0003328	Chr2	92105969	92114325	+	2834	protein_coding	- && sp|Q94BR1|MRF1_ARATH MA3 DOMAIN-CONTAINING TRANSLATION REGULATORY FACTOR 1 OS=Arabidopsis thaliana OX=3702 GN=MRF1 PE=1 SV=1 && PF02847:MA3 domain	-
CSS0041032	17798.7	18812.7	19378.1	8921.04	8396.54	8045.52	18663.2	8454.37	1.14227	4.191e-204	2.99914e-202	CSS0041032	Chr5	18808737	18810956	-	1848	protein_coding	- && sp|P0CG85|UBI1P_NICSY Polyubiquitin OS=Nicotiana sylvestris OX=4096 GN=UBI11 PE=2 SV=1 && PF00240:Ubiquitin family	ubiquitin
CSS0010377	686.34	618.158	671.924	2687.35	2578.57	2645.33	658.807	2637.08	-1.99927	1.48318e-203	1.05772e-201	CSS0010377	Chr1	207585172	207590962	+	3984	protein_coding	- && - && -	-
CSS0027340	264.903	268.02	277.806	1689.48	1651.12	1667.39	270.243	1669.33	-2.62638	4.02374e-203	2.86456e-201	CSS0027340	Chr11	8426486	8432992	-	4518	protein_coding	- && sp|Q7DM58|AB4C_ARATH ABC transporter C family member 4 OS=Arabidopsis thaliana OX=3702 GN=ABCC4 PE=1 SV=2 && PF00005:ABC transporter|PF00664:ABC transporter transmembrane region	ABC_membrane
CSS0002725	3527.03	3361.09	3713.37	983.154	921.734	1030.75	3533.83	978.546	1.85323	6.65894e-203	4.73243e-201	CSS0002725	Contig159	287348	296527	-	2121	protein_coding	- && sp|P37272|PSY_CAPAN Bifunctional 15-cis-phytoene synthase, chromoplastic OS=Capsicum annuum OX=4072 GN=PSY1 PE=1 SV=1 && PF00494:Squalene/phytoene synthase	-
CSS0040248	17.0582	14.8267	18.264	1807.2	1741.58	1669.35	16.7163	1739.38	-6.69315	1.23924e-202	8.79198e-201	CSS0040248	Chr14	44282927	44285009	+	2083	protein_coding	- && sp|Q940R4|ASP63_ARATH Probable aspartyl protease At4g16563 OS=Arabidopsis thaliana OX=3702 GN=At4g16563 PE=2 SV=1 && PF14543:Xylanase inhibitor N-terminal|PF14541:Xylanase inhibitor C-terminal	-
CSS0042435	214.732	232.664	222.052	1832.03	1593.99	1664.46	223.15	1696.83	-2.92839	1.39911e-202	9.90917e-201	CSS0042435	Chr13	101797753	101800622	-	2255	protein_coding	- && sp|Q9FWX7|AB11B_ARATH ABC transporter B family member 11 OS=Arabidopsis thaliana OX=3702 GN=ABCB11 PE=2 SV=1 && PF00664:ABC transporter transmembrane region|PF00005:ABC transporter	ABC_membrane
CSS0039762	1663.67	1589.87	1570.71	194.056	227.577	234.706	1608.08	218.779	2.8793	2.72436e-202	1.92622e-200	CSS0039762	Chr2	113466948	113477099	-	2087	protein_coding	- && sp|O48652|UVR3_ARATH (6-4)DNA photolyase OS=Arabidopsis thaliana OX=3702 GN=UVR3 PE=1 SV=2 && PF03441:FAD binding domain of DNA photolyase|PF00875:DNA photolyase	-
CSS0010388	122.417	157.391	127.848	1390.58	1386.41	1503.1	135.885	1426.69	-3.39873	3.11927e-202	2.20167e-200	CSS0010388	Contig930	141074	147825	-	2401	protein_coding	- && sp|Q9C6S7|PMTK_ARATH Probable methyltransferase PMT20 OS=Arabidopsis thaliana OX=3702 GN=At1g31850 PE=2 SV=1 && PF03141:Putative S-adenosyl-L-methionine-dependent methyltransferase	-
CSS0027199	2121.23	2206.89	2105.17	404.666	465.628	409.757	2144.43	426.684	2.32919	3.90168e-202	2.74922e-200	CSS0027199	Chr4	69860930	69878191	-	3057	protein_coding	- && sp|P08509|NIA2_TOBAC Nitrate reductase [NADH] 2 OS=Nicotiana tabacum OX=4097 GN=NIA2 PE=2 SV=2 && PF00174:Oxidoreductase molybdopterin binding domain|PF00970:Oxidoreductase FAD-binding domain|PF00175:Oxidoreductase NAD-binding domain|PF00173:Cytochrome b5-like Heme/Steroid binding domain|PF03404:Mo-co oxidoreductase dimerisation domain	FAD_binding_6
CSS0010367	317.081	378.65	312.411	2179.68	1963.45	2083.01	336.047	2075.38	-2.63097	5.25457e-202	3.69619e-200	CSS0010367	Chr1	20156946	20160986	-	2509	protein_coding	- && sp|P45726|PALY_CAMSI Phenylalanine ammonia-lyase OS=Camellia sinensis OX=4442 GN=PAL PE=2 SV=1 && PF00221:Aromatic amino acid lyase	-
CSS0038145	1211.13	1227.19	1281.37	88.2907	90.4595	60.6323	1239.9	79.7942	3.95472	7.56165e-202	5.31e-200	CSS0038145	Chr3	16339892	16344849	+	2124	protein_coding	- && sp|P38500|NIR_BETPN Ferredoxin--nitrite reductase, chloroplastic OS=Betula pendula OX=3505 GN=NIR1 PE=2 SV=1 && PF01077:Nitrite and sulphite reductase 4Fe-4S domain|PF03460:Nitrite/Sulfite reductase ferredoxin-like half domain	-
CSS0025246	100.342	83.2574	87.4751	1224.11	1204.54	1230.25	90.3582	1219.63	-3.75179	9.05478e-202	6.34772e-200	CSS0025246	Chr8	40952439	40954523	-	825	protein_coding	- && sp|Q40477|ERF4_TOBAC Ethylene-responsive transcription factor 4 OS=Nicotiana tabacum OX=4097 GN=ERF4 PE=1 SV=1 && PF00847:AP2 domain	AP2
novel.4768	72.2463	99.2245	72.0949	1313.32	1287.38	1209.71	81.1886	1270.14	-3.97873	9.8545e-202	6.89664e-200	-	Chr4	14296038	14299548	+	3511	-	- && sp|O48851|RLP22_ARATH Receptor like protein 22 OS=Arabidopsis thaliana OX=3702 GN=RLP22 PE=2 SV=1 && PF13855:Leucine rich repeat	-
CSS0002452	1475.03	1427.92	1359.23	75.415	125.691	94.8603	1420.73	98.6554	3.85004	1.51746e-201	1.0602e-199	CSS0002452	Chr3	1722707	1726875	-	2634	protein_coding	- && sp|Q7XJL2|GLR31_ARATH Glutamate receptor 3.1 OS=Arabidopsis thaliana OX=3702 GN=GLR3.1 PE=2 SV=3 && PF00060:Ligand-gated ion channel|PF00497:Bacterial extracellular solute-binding proteins, family 3|PF01094:Receptor family ligand binding region	ANF_receptor
CSS0018974	181.619	203.011	173.989	1548.77	1442.59	1544.17	186.206	1511.84	-3.02531	7.71847e-201	5.3835e-199	CSS0018974	Chr6	170263747	170267894	-	1398	protein_coding	- && sp|O23006|LYM2_ARATH LysM domain-containing GPI-anchored protein 2 OS=Arabidopsis thaliana OX=3702 GN=LYM2 PE=1 SV=1 && PF01476:LysM domain	LysM
CSS0008858	1509.15	1342.38	1300.59	19.3136	26.6617	16.625	1384.04	20.8668	6.05045	1.36332e-199	9.49291e-198	CSS0008858	Chr14	29922468	29935161	-	2527	protein_coding	- && sp|Q9LYG9|MSL10_ARATH Mechanosensitive ion channel protein 10 OS=Arabidopsis thaliana OX=3702 GN=MSL10 PE=1 SV=1 && PF00924:Mechanosensitive ion channel	-
CSS0020356	5688.4	5485.86	5641.67	2297.4	2092.95	2137.78	5605.31	2176.04	1.36498	4.27739e-199	2.97337e-197	CSS0020356	Chr7	61306354	61315773	-	3558	protein_coding	- && sp|P29196|CAPP_SOLTU Phosphoenolpyruvate carboxylase OS=Solanum tuberosum OX=4113 GN=PPC1 PE=2 SV=2 && PF00311:Phosphoenolpyruvate carboxylase	-
CSS0041702	251.859	272.582	260.503	1697.76	1753.96	1609.69	261.648	1687.14	-2.69038	7.00719e-199	4.86275e-197	CSS0041702	Chr3	130780548	130820861	-	1473	protein_coding	- && sp|O64882|BGL17_ARATH Beta-glucosidase 17 OS=Arabidopsis thaliana OX=3702 GN=BGLU17 PE=2 SV=1 && PF00232:Glycosyl hydrolase family 1	Glyco_hydro_1
CSS0026865	2192.48	2188.64	2145.54	13.7954	7.61764	11.7353	2175.55	11.0495	7.61788	1.13636e-198	7.87274e-197	CSS0026865	Chr4	12139307	12144084	+	2099	protein_coding	- && sp|P55233|GLGL1_BETVU Glucose-1-phosphate adenylyltransferase large subunit, chloroplastic/amyloplastic OS=Beta vulgaris OX=161934 GN=AGPS1 PE=2 SV=1 && PF00483:Nucleotidyl transferase	-
CSS0038080	684.333	674.043	629.629	2531	2561.43	2606.21	662.668	2566.21	-1.95411	1.37525e-198	9.51179e-197	CSS0038080	Chr6	35200747	35205465	-	1835	protein_coding	- && sp|Q9ZU52|ALFP3_ARATH Fructose-bisphosphate aldolase 3, chloroplastic OS=Arabidopsis thaliana OX=3702 GN=FBA3 PE=1 SV=1 && PF00274:Fructose-bisphosphate aldolase class-I	-
CSS0046135	2173.41	2152.15	2202.26	462.607	400.878	473.323	2175.94	445.603	2.28801	2.32557e-197	1.60577e-195	CSS0046135	Chr14	31858778	31864751	+	3365	protein_coding	- && sp|O23617|TPS5_ARATH Alpha,alpha-trehalose-phosphate synthase [UDP-forming] 5 OS=Arabidopsis thaliana OX=3702 GN=TPS5 PE=1 SV=2 && PF02358:Trehalose-phosphatase|PF00982:Glycosyltransferase family 20	-
CSS0002737	96.3285	88.9599	79.785	1222.27	1195.97	1167.66	88.3578	1195.3	-3.75967	6.74849e-197	4.65195e-195	CSS0002737	Chr4	128630369	128641902	+	1940	protein_coding	- && sp|P48522|TCMO_CATRO Trans-cinnamate 4-monooxygenase OS=Catharanthus roseus OX=4058 GN=CYP73A4 PE=2 SV=1 && PF00067:Cytochrome P450	p450
CSS0009796	6707.87	6789.47	6573.13	3104.89	3094.67	2997.39	6690.16	3065.65	1.1255	1.02656e-196	7.06462e-195	CSS0009796	Chr15	92005587	92008394	+	1098	protein_coding	- && sp|Q9SQL2|CB24_PEA Chlorophyll a-b binding protein P4, chloroplastic OS=Pisum sativum OX=3888 GN=lhcA-P4 PE=1 SV=1 && PF00504:Chlorophyll A-B binding protein	-
CSS0034293	7758.45	8274.41	7777.6	3172.95	3317.48	3472.67	7936.82	3321.03	1.25687	1.18625e-196	8.14997e-195	CSS0034293	Chr8	133527495	133531730	-	1708	protein_coding	- && sp|P19950|RS141_MAIZE 40S ribosomal protein S14 OS=Zea mays OX=4577 PE=3 SV=1 && PF00411:Ribosomal protein S11	-
CSS0041945	337.15	327.327	293.186	1940.56	1785.38	1916.76	319.221	1880.9	-2.56041	1.6456e-196	1.12871e-194	CSS0041945	Chr1	183105780	183110433	+	3973	protein_coding	- && sp|O49545|BAME1_ARATH Leucine-rich repeat receptor-like serine/threonine-protein kinase BAM1 OS=Arabidopsis thaliana OX=3702 GN=BAM1 PE=1 SV=1 && PF07714:Protein tyrosine kinase|PF08263:Leucine rich repeat N-terminal domain|PF12799:Leucine Rich repeats (2 copies)	Pkinase_Tyr
CSS0047285	506.728	468.75	512.354	2429.83	2266.25	2216.01	495.944	2304.03	-2.21433	3.13779e-196	2.14863e-194	CSS0047285	Chr5	190990584	190998787	+	2358	protein_coding	- && sp|Q9FGX1|ACLB2_ARATH ATP-citrate synthase beta chain protein 2 OS=Arabidopsis thaliana OX=3702 GN=ACLB-2 PE=1 SV=1 && PF00549:CoA-ligase|PF00285:Citrate synthase, C-terminal domain	Citrate_synt
novel.2335	2600.87	2354.02	2402.2	541.7	535.139	585.787	2452.36	554.209	2.1464	6.48243e-196	4.43156e-194	-	Chr13	44675988	44687539	-	6686	-	- && - && -	-
CSS0020827	1706.82	1612.68	1673.56	281.427	244.717	238.618	1664.36	254.92	2.70587	6.58582e-196	4.4948e-194	CSS0020827	Chr10	12412750	12416669	+	2517	protein_coding	- && sp|Q9C9V6|Y1790_ARATH BTB/POZ domain-containing protein At1g67900 OS=Arabidopsis thaliana OX=3702 GN=At1g67900 PE=1 SV=1 && PF03000:NPH3 family	-
CSS0025215	1492.09	1427.92	1406.33	104.845	142.831	154.515	1442.11	134.064	3.43034	9.99518e-196	6.81042e-194	CSS0025215	Chr6	36303207	36305511	+	1222	protein_coding	- && sp|F1B281|EBIII_PETHY MYB-like transcription factor 4 OS=Petunia hybrida OX=4102 GN=MYB4 PE=2 SV=1 && PF00249:Myb-like DNA-binding domain	Myb_DNA-binding
CSS0004295	47.1608	35.3559	42.2957	1135.82	1319.76	1176.46	41.6041	1210.68	-4.85542	1.08413e-195	7.37478e-194	CSS0004295	Chr7	14109386	14110013	-	628	protein_coding	- && - && PF04520:Senescence regulator	-
CSS0012513	3988.6	3873.18	3852.75	1263.66	1371.17	1235.14	3904.84	1289.99	1.59787	1.48015e-195	1.00521e-193	CSS0012513	Chr11	66111188	66115553	-	1847	protein_coding	- && sp|Q0WWW9|XYLL3_ARATH D-xylose-proton symporter-like 3, chloroplastic OS=Arabidopsis thaliana OX=3702 GN=At5g59250 PE=1 SV=2 && PF00083:Sugar (and other) transporter	Sugar_tr
CSS0037862	2817.61	2893.48	2819.39	6474.65	6235.04	6559.05	2843.49	6422.91	-1.17592	1.09124e-194	7.39875e-193	CSS0037862	Chr10	93706587	93715975	-	1387	protein_coding	- && sp|O65735|ALF_CICAR Fructose-bisphosphate aldolase, cytoplasmic isozyme OS=Cicer arietinum OX=3827 GN=ALDC PE=2 SV=1 && PF00274:Fructose-bisphosphate aldolase class-I	-
CSS0014929	174.595	188.184	135.538	1557.04	1475.92	1531.46	166.106	1521.47	-3.20203	1.61143e-194	1.09078e-192	CSS0014929	Chr9	1690381	1693285	-	1722	protein_coding	- && sp|Q96552|METK2_CATRO S-adenosylmethionine synthase 2 OS=Catharanthus roseus OX=4058 GN=SAMS2 PE=1 SV=1 && PF00438:S-adenosylmethionine synthetase, N-terminal domain|PF02772:S-adenosylmethionine synthetase, central domain|PF02773:S-adenosylmethionine synthetase, C-terminal domain	-
CSS0014364	201.688	195.028	162.454	1559.8	1456.87	1590.13	186.39	1535.6	-3.04543	4.15439e-194	2.80751e-192	CSS0014364	Chr10	22936419	22937820	-	1402	protein_coding	- && sp|O48716|JGB_ARATH Protein JINGUBANG OS=Arabidopsis thaliana OX=3702 GN=JGB PE=1 SV=1 && -	-
CSS0012892	789.693	693.431	860.332	3262.16	3130.85	3285.88	781.152	3226.3	-2.04316	6.19277e-194	4.1782e-192	CSS0012892	Contig817	96424	116809	-	3064	protein_coding	- && sp|C0LGD7|Y1684_ARATH Probable LRR receptor-like serine/threonine-protein kinase At1g06840 OS=Arabidopsis thaliana OX=3702 GN=At1g06840 PE=1 SV=2 && PF08263:Leucine rich repeat N-terminal domain|PF00069:Protein kinase domain	Pkinase
CSS0048841	3426.68	3378.2	3475.94	1108.23	1039.81	1143.21	3426.94	1097.08	1.64356	6.70117e-194	4.51383e-192	CSS0048841	Chr13	102889781	102897481	-	3329	protein_coding	- && - && PF07944:Beta-L-arabinofuranosidase, GH127	-
CSS0002578	1895.46	2026.69	1985.97	4889.1	4982.89	5087.25	1969.38	4986.41	-1.3407	6.64897e-193	4.47138e-191	CSS0002578	Chr2	5064871	5080264	+	10097	protein_coding	- && - && -	-
CSS0049715	2392.16	2382.53	2530.05	521.467	533.235	602.412	2434.91	552.371	2.14127	1.41537e-192	9.50276e-191	CSS0049715	Chr6	161543604	161544285	+	436	protein_coding	- && sp|Q84J70|DI193_ARATH Protein DEHYDRATION-INDUCED 19 homolog 3 OS=Arabidopsis thaliana OX=3702 GN=DI19-3 PE=1 SV=1 && -	-
novel.1901	1331.54	1317.29	1216.96	23.9121	20.9485	14.6691	1288.6	19.8432	6.01465	2.55816e-192	1.71476e-190	-	Chr12	84996245	85274673	-	5750	-	- && sp|H2DH17|C7A22_PANGI Cytochrome P450 CYP749A22 OS=Panax ginseng OX=4054 PE=2 SV=1 && PF00067:Cytochrome P450	p450
CSS0000687	2308.87	2519.39	2556.97	572.97	517.047	493.86	2461.74	527.959	2.22025	1.75357e-191	1.17163e-189	CSS0000687	Chr7	58555200	58559618	-	2108	protein_coding	- && sp|Q9SIV3|GLK1_ARATH Transcription activator GLK1 OS=Arabidopsis thaliana OX=3702 GN=GLK1 PE=1 SV=2 && PF00249:Myb-like DNA-binding domain	Myb_DNA-binding
CSS0008951	210.718	234.945	222.052	1632.46	1506.39	1514.83	222.572	1551.23	-2.8031	1.17772e-190	7.85611e-189	CSS0008951	Chr5	112303477	112307144	+	3450	protein_coding	- && sp|Q9SGP2|HSL1_ARATH Receptor-like protein kinase HSL1 OS=Arabidopsis thaliana OX=3702 GN=HSL1 PE=2 SV=1 && -	-
novel.9377	386.317	433.395	378.738	1988.38	1941.55	2006.73	399.483	1978.89	-2.31143	1.07759e-189	7.17657e-188	-	Contig6	593101	601773	-	7362	-	- && sp|O49879|CF0_SOLLC Receptor-like protein Cf-9 homolog OS=Solanum lycopersicum OX=4081 GN=HCR9-0 PE=2 SV=2 && PF13855:Leucine rich repeat|PF00121:Triosephosphate isomerase	-
CSS0018089	6267.37	6147.36	6194.39	2818.87	2633.8	2639.46	6203.04	2697.38	1.20122	1.38182e-189	9.18785e-188	CSS0018089	Chr14	7714882	7716734	-	1691	protein_coding	- && sp|Q940T9|COL4_ARATH Zinc finger protein CONSTANS-LIKE 4 OS=Arabidopsis thaliana OX=3702 GN=COL4 PE=2 SV=2 && PF06203:CCT motif|PF00643:B-box zinc finger	CCT
novel.3026	44.1505	47.9015	29.7992	1115.59	1200.73	1108.99	40.6171	1141.77	-4.82632	2.07275e-189	1.37598e-187	-	Chr15	27081188	27085847	+	1120	-	- && - && -	-
CSS0010143	2784.49	2651.69	2645.4	710.005	774.143	721.72	2693.86	735.289	1.87352	2.28911e-189	1.51717e-187	CSS0010143	Contig698	423049	436409	-	1635	protein_coding	- && sp|Q9LF97|Y3295_ARATH CBS domain-containing protein CBSCBSPB3 OS=Arabidopsis thaliana OX=3702 GN=CBSCBSPB3 PE=1 SV=1 && PF00564:PB1 domain|PF00571:CBS domain	CBS
CSS0009220	7.02395	17.1077	5.76759	2735.17	2896.61	2882.97	9.96641	2838.25	-8.20495	3.3069e-189	2.18822e-187	CSS0009220	Chr13	124337032	124339755	-	1202	protein_coding	- && sp|Q6K508|GLUD1_ORYSJ Glutelin type-D 1 OS=Oryza sativa subsp. japonica OX=39947 GN=GLUD1 PE=2 SV=1 && PF00190:Cupin	-
CSS0008005	752.566	729.928	635.396	3246.52	3173.7	3766.05	705.963	3395.42	-2.267	1.0619e-188	7.01549e-187	CSS0008005	Chr3	121083514	121098381	-	4102	protein_coding	- && sp|Q941L0|CESA3_ARATH Cellulose synthase A catalytic subunit 3 [UDP-forming] OS=Arabidopsis thaliana OX=3702 GN=CESA3 PE=1 SV=2 && PF14569:Zinc-binding RING-finger|PF03552:Cellulose synthase	-
CSS0012995	4513.39	4605.39	4770.76	1827.43	1852.99	1810.17	4629.85	1830.2	1.33908	2.50572e-188	1.65278e-186	CSS0012995	Chr14	33576413	33578711	+	748	protein_coding	- && sp|Q39732|GCSH_FLAAN Glycine cleavage system H protein, mitochondrial OS=Flaveria anomala OX=35877 GN=GDCSH PE=2 SV=1 && PF01597:Glycine cleavage H-protein	-
CSS0050206	1073.66	1089.19	1168.9	76.3347	52.3713	59.6544	1110.58	62.7868	4.14201	4.89996e-188	3.22686e-186	CSS0050206	Chr1	89725597	89726365	-	769	protein_coding	- && - && -	-
CSS0010216	29.0992	23.9508	39.4119	1140.42	1212.16	1127.57	30.8206	1160.05	-5.2179	7.89425e-188	5.19047e-186	CSS0010216	Chr3	51057185	51065205	+	1068	protein_coding	- && sp|Q9SFF6|PAE12_ARATH Pectin acetylesterase 12 OS=Arabidopsis thaliana OX=3702 GN=PAE12 PE=2 SV=1 && PF03283:Pectinacetylesterase	-
CSS0041448	423.444	368.385	358.552	2168.64	1959.64	2115.29	383.46	2081.19	-2.43983	1.60467e-187	1.05339e-185	CSS0041448	Chr13	66058096	66063557	+	2610	protein_coding	- && sp|P45726|PALY_CAMSI Phenylalanine ammonia-lyase OS=Camellia sinensis OX=4442 GN=PAL PE=2 SV=1 && PF00221:Aromatic amino acid lyase	-
CSS0016195	1717.86	1674.27	1571.67	276.828	281.853	249.375	1654.6	269.352	2.61798	2.95675e-187	1.93789e-185	CSS0016195	Contig894	265432	269488	+	1815	protein_coding	- && sp|Q8S9D1|PP395_ARATH Pentatricopeptide repeat-containing protein At5g21222 OS=Arabidopsis thaliana OX=3702 GN=ATC401 PE=2 SV=1 && PF13041:PPR repeat family	-
CSS0046551	173.592	152.829	157.647	1327.12	1360.7	1310.44	161.356	1332.75	-3.04447	6.08171e-187	3.97971e-185	CSS0046551	Chr5	25859499	25863508	+	985	protein_coding	- && - && PF06749:Protein of unknown function (DUF1218)	-
novel.964	481.642	480.156	452.756	2227.5	2239.59	2044.87	471.518	2170.65	-2.20376	6.33068e-187	4.13608e-185	-	Chr10	12676377	12681519	-	1738	-	- && - && PF00564:PB1 domain	-
CSS0049953	97.3319	70.7117	61.521	1414.49	1187.4	1389.65	76.5215	1330.51	-4.11968	5.20898e-186	3.39249e-184	CSS0049953	Chr6	89589364	89596213	-	1985	protein_coding	- && sp|Q5XF03|GPAT8_ARATH Probable glycerol-3-phosphate acyltransferase 8 OS=Arabidopsis thaliana OX=3702 GN=GPAT8 PE=2 SV=1 && PF12710:haloacid dehalogenase-like hydrolase|PF01553:Acyltransferase	Acyltransferase
CSS0031365	62.2121	47.9015	57.6759	1100.87	1065.52	1058.13	55.9298	1074.84	-4.25738	7.95631e-186	5.1736e-184	CSS0031365	Contig875	221748	226646	-	2713	protein_coding	- && sp|Q9SH89|OFT19_ARATH O-fucosyltransferase 19 OS=Arabidopsis thaliana OX=3702 GN=OFUT19 PE=2 SV=1 && PF10250:GDP-fucose protein O-fucosyltransferase	-
CSS0008177	76.26	50.1825	37.4893	1242.51	1174.07	1233.18	54.644	1216.59	-4.47786	1.95673e-185	1.27036e-183	CSS0008177	Chr5	57288116	57291257	+	1483	protein_coding	- && sp|Q9FKH6|B561P_ARATH Cytochrome b561 and DOMON domain-containing protein At5g35735 OS=Arabidopsis thaliana OX=3702 GN=At5g35735 PE=2 SV=1 && PF04526:Protein of unknown function (DUF568)|PF03188:Eukaryotic cytochrome b561	Cytochrom_B561
CSS0029454	142.486	195.028	155.725	1433.8	1415.93	1464.96	164.413	1438.23	-3.1359	2.90674e-185	1.88418e-183	CSS0029454	Chr8	35049511	35056005	-	2112	protein_coding	- && sp|Q94BV7|NDB2_ARATH External alternative NAD(P)H-ubiquinone oxidoreductase B2, mitochondrial OS=Arabidopsis thaliana OX=3702 GN=NDB2 PE=1 SV=1 && PF07992:Pyridine nucleotide-disulphide oxidoreductase	Pyr_redox_2
CSS0049701	55.1882	45.6205	35.5668	1108.23	1115.03	1051.29	45.4585	1091.52	-4.58952	1.96685e-184	1.27294e-182	CSS0049701	Chr5	162070844	162071507	-	612	protein_coding	- && sp|Q8LDC8|ERF92_ARATH Ethylene-responsive transcription factor 1B OS=Arabidopsis thaliana OX=3702 GN=ERF1B PE=1 SV=2 && PF00847:AP2 domain	AP2
CSS0006061	472.611	501.825	462.369	2096.9	2031.05	2116.26	478.935	2081.41	-2.12132	2.08243e-184	1.34563e-182	CSS0006061	Chr2	116292877	116300201	-	2290	protein_coding	- && sp|O24381|TLC1_SOLTU Plastidic ATP/ADP-transporter OS=Solanum tuberosum OX=4113 PE=2 SV=2 && PF03219:TLC ATP/ADP transporter	-
CSS0039544	4976.97	4913.33	4877.46	2069.31	2081.52	2137.78	4922.59	2096.2	1.23177	5.2028e-184	3.3567e-182	CSS0039544	Chr9	62314856	62321467	-	2063	protein_coding	- && sp|Q9XF61|PDI_DATGL Protein disulfide-isomerase OS=Datisca glomerata OX=34297 GN=PDI PE=2 SV=1 && PF00085:Thioredoxin|PF13848:Thioredoxin-like domain	-
CSS0008947	6033.57	6059.54	5892.56	2481.34	2402.41	2196.46	5995.22	2360.07	1.34444	1.2323e-183	7.93806e-182	CSS0008947	Contig854	90623	92795	+	566	protein_coding	- && sp|Q8LHP0|ELOF1_ORYSJ Transcription elongation factor 1 homolog OS=Oryza sativa subsp. japonica OX=39947 GN=Os07g0631100 PE=3 SV=1 && -	-
CSS0033077	1094.73	1117.7	1196.78	22.0727	18.0919	28.3603	1136.4	22.8416	5.6401	1.29935e-183	8.35691e-182	CSS0033077	Chr13	35147502	35148341	+	840	protein_coding	- && sp|Q9LDH1|SIB1_ARATH Sigma factor binding protein 1, chloroplastic OS=Arabidopsis thaliana OX=3702 GN=SIB1 PE=1 SV=1 && PF05678:VQ motif	-
CSS0035844	1674.71	1565.92	1664.91	297.981	297.088	285.559	1635.18	293.543	2.47799	2.18067e-183	1.40034e-181	CSS0035844	Chr6	51653370	51655432	+	2063	protein_coding	- && sp|Q9ZQ96|U73C3_ARATH UDP-glycosyltransferase 73C3 OS=Arabidopsis thaliana OX=3702 GN=UGT73C3 PE=2 SV=1 && PF00201:UDP-glucoronosyl and UDP-glucosyl transferase	UDPGT
CSS0001790	1336.56	1409.67	1461.12	183.019	198.059	165.272	1402.45	182.117	2.94441	7.63223e-183	4.89351e-181	CSS0001790	Chr3	98295446	98296956	+	1114	protein_coding	- && sp|Q9M2E2|SDR1_ARATH (+)-neomenthol dehydrogenase OS=Arabidopsis thaliana OX=3702 GN=SDR1 PE=1 SV=1 && PF00106:short chain dehydrogenase	adh_short
novel.8053	9.03079	13.6861	27.8767	1470.59	1426.4	1429.75	16.8645	1442.25	-6.39511	8.1837e-183	5.23896e-181	-	Chr9	21715406	21818574	-	829	-	- && - && -	-
CSS0037517	404.379	372.947	423.918	1887.21	1943.45	1980.33	400.415	1937	-2.27162	1.01049e-182	6.45886e-181	CSS0037517	Chr9	16918090	16924158	+	5181	protein_coding	- && sp|F4JIF4|NET1B_ARATH Protein NETWORKED 1B OS=Arabidopsis thaliana OX=3702 GN=NET1B PE=2 SV=1 && -	-
CSS0033730	1035.53	1025.32	1038.17	22.9924	35.2316	35.2059	1033.01	31.1433	5.05689	1.04569e-182	6.67349e-181	CSS0033730	Chr5	146418398	146421757	-	1040	protein_coding	- && sp|Q9SDN0|DNJ20_ARATH Chaperone protein dnaJ 20, chloroplastic OS=Arabidopsis thaliana OX=3702 GN=ATJ20 PE=1 SV=2 && PF00226:DnaJ domain	DnaJ
CSS0032707	3246.07	3282.39	3089.51	898.542	991.245	857.654	3205.99	915.814	1.80719	6.08388e-182	3.87669e-180	CSS0032707	Contig1113	104921	110119	-	1127	protein_coding	- && - && -	-
CSS0033078	337.15	312.5	316.256	4783.33	4346.81	5758.12	321.969	4962.75	-3.94579	7.27979e-182	4.63158e-180	CSS0033078	Chr14	16168715	16174767	+	3736	protein_coding	- && sp|Q5JL96|ZFP34_ORYSJ Probable E3 ubiquitin-protein ligase RZFP34 OS=Oryza sativa subsp. japonica OX=39947 GN=RZFP34 PE=2 SV=1 && PF05495:CHY zinc finger|PF14599:Zinc-ribbon|PF13639:Ring finger domain	zf-CHY
CSS0027976	85.2908	52.4636	50.9471	1305.97	1155.02	1199.93	62.9005	1220.31	-4.27398	1.39772e-181	8.87896e-180	CSS0027976	Chr14	20323478	20327424	+	3444	protein_coding	- && sp|O49545|BAME1_ARATH Leucine-rich repeat receptor-like serine/threonine-protein kinase BAM1 OS=Arabidopsis thaliana OX=3702 GN=BAM1 PE=1 SV=1 && PF13855:Leucine rich repeat|PF00069:Protein kinase domain	Pkinase
CSS0009281	2123.24	2185.22	2075.37	472.723	413.257	489.948	2127.94	458.643	2.21386	1.87606e-180	1.18993e-178	CSS0009281	Contig733	659070	664937	+	1923	protein_coding	- && sp|P93115|MGDG_CUCSA Monogalactosyldiacylglycerol synthase, chloroplastic OS=Cucumis sativus OX=3659 PE=1 SV=1 && PF06925:Monogalactosyldiacylglycerol (MGDG) synthase|PF04101:Glycosyltransferase family 28 C-terminal domain	-
CSS0044066	446.523	395.758	360.474	2050	2009.15	2044.87	400.918	2034.68	-2.34398	3.78057e-180	2.39422e-178	CSS0044066	Chr9	45618707	45626610	-	2925	protein_coding	- && sp|Q8VZR6|INT1_ARATH Inositol transporter 1 OS=Arabidopsis thaliana OX=3702 GN=INT1 PE=1 SV=1 && PF00083:Sugar (and other) transporter	Sugar_tr
CSS0008454	566.933	588.504	542.154	2249.57	2209.12	2211.12	565.864	2223.27	-1.97567	5.52351e-180	3.49267e-178	CSS0008454	Chr9	59874962	59884570	+	1760	protein_coding	- && sp|P9WPZ4|DAPC_MYCTO Probable N-succinyldiaminopimelate aminotransferase DapC OS=Mycobacterium tuberculosis (strain CDC 1551 / Oshkosh) OX=83331 GN=dapC PE=1 SV=1 && PF00155:Aminotransferase class I and II	Aminotran_1_2
CSS0033782	23.0787	25.0913	32.683	1122.95	1126.46	1087.47	26.951	1112.29	-5.35961	7.80193e-180	4.92584e-178	CSS0033782	Chr4	190323134	190327850	+	1074	protein_coding	- && sp|P22195|PER1_ARAHY Cationic peroxidase 1 OS=Arachis hypogaea OX=3818 GN=PNC1 PE=1 SV=2 && PF00141:Peroxidase	-
novel.6156	644.197	447.081	493.129	3055.23	3071.81	3065.84	528.135	3064.29	-2.53409	9.54761e-180	6.01879e-178	-	Chr6	39927955	39929994	+	510	-	- && sp|D9HP26|CNR10_MAIZE Cell number regulator 10 OS=Zea mays OX=4577 GN=CNR10 PE=2 SV=1 && -	-
CSS0013365	2390.15	2409.9	2313.77	569.291	643.69	604.367	2371.27	605.783	1.96894	1.6776e-179	1.05594e-177	CSS0013365	Chr9	6470042	6473456	-	690	protein_coding	- && - && -	-
CSS0020241	68.2327	98.084	90.3589	1130.31	1145.5	1131.48	85.5585	1135.76	-3.73581	2.63198e-179	1.65414e-177	CSS0020241	Chr6	9989161	9990028	-	834	protein_coding	- && sp|F8WKW1|UGT2_GARJA 7-deoxyloganetin glucosyltransferase OS=Gardenia jasminoides OX=114476 GN=UGT85A24 PE=1 SV=1 && PF00201:UDP-glucoronosyl and UDP-glucosyl transferase	UDPGT
CSS0004721	6502.17	6557.94	6689.44	3210.66	3192.74	3164.62	6583.19	3189.34	1.04557	3.97653e-179	2.49536e-177	CSS0004721	Chr5	12197613	12200654	-	3042	protein_coding	- && sp|P56331|IF1A_ONOVI Eukaryotic translation initiation factor 1A OS=Onobrychis viciifolia OX=3882 PE=2 SV=2 && PF01176:Translation initiation factor 1A / IF-1	-
CSS0017314	1272.34	1313.87	1366.92	172.903	179.015	152.559	1317.71	168.159	2.96936	6.12969e-179	3.84068e-177	CSS0017314	Chr12	140792112	140797374	+	1105	protein_coding	- && sp|O22152|YAB1_ARATH Axial regulator YABBY 1 OS=Arabidopsis thaliana OX=3702 GN=YAB1 PE=1 SV=1 && PF04690:YABBY protein	YABBY
CSS0031581	89.3045	60.4471	82.6688	1097.2	1133.12	1118.76	77.4735	1116.36	-3.83882	8.00162e-179	5.00598e-177	CSS0031581	Chr1	153945493	153947001	-	1509	protein_coding	- && sp|Q9FVS9|C96AF_ARATH Alkane hydroxylase MAH1 OS=Arabidopsis thaliana OX=3702 GN=CYP96A15 PE=2 SV=1 && PF00067:Cytochrome P450	p450
CSS0043818	6652.68	6597.86	6411.64	3133.4	3068	3150.93	6554.06	3117.44	1.0719	1.56737e-178	9.79094e-177	CSS0043818	Chr8	94400539	94404610	-	730	protein_coding	- && sp|P49690|RL23_ARATH 60S ribosomal protein L23 OS=Arabidopsis thaliana OX=3702 GN=RPL23A PE=2 SV=3 && PF00238:Ribosomal protein L14p/L23e	-
CSS0041318	237.811	245.21	236.471	1503.7	1446.4	1460.07	239.831	1470.06	-2.61676	3.28255e-178	2.04743e-176	CSS0041318	Chr2	17086439	17086691	-	159	protein_coding	- && - && -	-
CSS0019712	1898.47	1825.96	1822.56	399.148	344.698	382.375	1849	375.407	2.29993	1.61524e-177	1.00596e-175	CSS0019712	Chr11	96261177	96262027	-	851	protein_coding	- && sp|O04341|GRXS9_ARATH Monothiol glutaredoxin-S9 OS=Arabidopsis thaliana OX=3702 GN=GRXS9 PE=1 SV=1 && PF00462:Glutaredoxin	-
CSS0004063	1547.28	1553.38	1531.3	3974.92	3903.09	4058.45	1543.98	3978.82	-1.36583	1.8444e-177	1.14694e-175	CSS0004063	Chr10	159276252	159295161	-	3794	protein_coding	- && sp|O81644|VILI2_ARATH Villin-2 OS=Arabidopsis thaliana OX=3702 GN=VLN2 PE=1 SV=2 && PF00626:Gelsolin repeat|PF02209:Villin headpiece domain	-
CSS0027745	41.1403	20.5292	35.5668	1080.64	1125.51	1048.35	32.4121	1084.83	-5.04508	2.42024e-177	1.50277e-175	CSS0027745	Chr14	23511278	23515116	+	1506	protein_coding	- && sp|Q9ASU8|NDL2_ARATH Protein NDL2 OS=Arabidopsis thaliana OX=3702 GN=NDL2 PE=1 SV=1 && PF03096:Ndr family	Ndr
CSS0048493	4014.69	4118.39	4009.44	8254.26	8187.06	7880.25	4047.51	8107.19	-1.0026	3.87075e-177	2.39981e-175	CSS0048493	Chr1	112085937	112091308	-	1056	protein_coding	- && sp|Q9XGW0|COMT1_OCIBA Caffeic acid 3-O-methyltransferase 1 OS=Ocimum basilicum OX=39350 GN=COMT1 PE=2 SV=1 && PF08100:Dimerisation domain|PF00891:O-methyltransferase domain	-
CSS0041747	3520	3689.56	3566.29	1311.49	1256.91	1217.54	3591.95	1261.98	1.50842	4.13807e-177	2.56169e-175	CSS0041747	Chr11	47593461	47604383	+	1962	protein_coding	- && sp|Q058N4|MRS2B_ARATH Magnesium transporter MRS2-11, chloroplastic OS=Arabidopsis thaliana OX=3702 GN=MRS2-11 PE=1 SV=1 && PF01544:CorA-like Mg2+ transporter protein	-
CSS0013861	123.421	122.035	146.112	1245.27	1185.49	1250.79	130.523	1227.18	-3.22904	9.60078e-177	5.93452e-175	CSS0013861	Chr3	32358206	32375210	-	2508	protein_coding	- && sp|Q9LXA5|LRK91_ARATH L-type lectin-domain containing receptor kinase IX.1 OS=Arabidopsis thaliana OX=3702 GN=LECRK91 PE=1 SV=1 && PF00069:Protein kinase domain|PF00139:Legume lectin domain	Pkinase
CSS0011741	80.2737	69.5712	71.1336	1025.46	1046.47	1093.34	73.6595	1055.09	-3.83836	1.97226e-176	1.21729e-174	CSS0011741	Chr15	39702929	39711675	-	2089	protein_coding	- && sp|I3PB37|4CL1_PETHY 4-coumarate:CoA ligase 1 OS=Petunia hybrida OX=4102 GN=4CL1 PE=1 SV=1 && PF00501:AMP-binding enzyme|PF13193:AMP-binding enzyme C-terminal domain	AMP-binding
CSS0015872	1453.96	1406.25	1459.2	3837.89	3760.26	3752.36	1439.8	3783.5	-1.39329	1.14168e-175	7.03598e-174	CSS0015872	Chr5	184399207	184404646	-	1698	protein_coding	- && sp|Q9SQT8|DHQSD_ARATH Bifunctional 3-dehydroquinate dehydratase/shikimate dehydrogenase, chloroplastic OS=Arabidopsis thaliana OX=3702 GN=EMB3004 PE=1 SV=1 && PF08501:Shikimate dehydrogenase substrate binding domain|PF01488:Shikimate / quinate 5-dehydrogenase|PF01487:Type I 3-dehydroquinase|PF18317:Shikimate 5'-dehydrogenase C-terminal domain	-
CSS0034801	1015.46	994.526	969.917	60.6999	51.4191	40.0956	993.302	50.7382	4.28664	1.53038e-175	9.41742e-174	CSS0034801	Chr7	51608079	51613484	+	2128	protein_coding	- && sp|M1BYJ7|ENDB1_SOLTU External alternative NAD(P)H-ubiquinone oxidoreductase B1, mitochondrial OS=Solanum tuberosum OX=4113 GN=NDB1 PE=3 SV=1 && PF07992:Pyridine nucleotide-disulphide oxidoreductase	Pyr_redox_2
CSS0048976	1320.5	1277.37	1275.6	12.8757	18.0919	12.7132	1291.16	14.5603	6.47087	5.82926e-174	3.58179e-172	CSS0048976	Chr7	50020500	50023292	+	852	protein_coding	- && - && PF00643:B-box zinc finger	zf-B_box
CSS0040293	962.281	915.831	981.452	34.0287	43.8014	43.0294	953.188	40.2865	4.56752	5.50021e-173	3.37458e-171	CSS0040293	Chr6	66948066	66949196	+	1131	protein_coding	- && - && -	-
CSS0026585	218.746	177.92	170.144	1611.31	1536.86	1407.26	188.937	1518.47	-3.00608	6.89731e-173	4.22547e-171	CSS0026585	Chr14	97272353	97274838	+	687	protein_coding	- && sp|Q9ZV52|EGC2_ARATH EG45-like domain containing protein 2 OS=Arabidopsis thaliana OX=3702 GN=EGC2 PE=2 SV=2 && PF03330:Lytic transglycolase	-
CSS0000973	1079.68	1015.06	1006.44	3162.83	3134.66	3052.15	1033.73	3116.55	-1.59195	1.64591e-172	1.00683e-170	CSS0000973	Chr2	9913822	9920237	-	2263	protein_coding	- && sp|Q8L4D8|IQD31_ARATH Protein IQ-DOMAIN 31 OS=Arabidopsis thaliana OX=3702 GN=IQD31 PE=1 SV=1 && PF13178:Protein of unknown function (DUF4005)	-
CSS0039217	6365.71	6261.41	6304.94	3101.21	2979.45	3039.44	6310.68	3040.03	1.0537	2.54117e-172	1.55218e-170	CSS0039217	Chr6	10742573	10749314	+	1477	protein_coding	- && sp|K4BW79|ENOX_SOLLC 2-methylene-furan-3-one reductase OS=Solanum lycopersicum OX=4081 GN=EO PE=1 SV=1 && PF13602:Zinc-binding dehydrogenase|PF08240:Alcohol dehydrogenase GroES-like domain	ADH_N
CSS0010641	763.604	776.689	725.755	2535.6	2525.25	2593.5	755.349	2551.45	-1.75709	5.42045e-172	3.30599e-170	CSS0010641	Chr9	35277515	35280188	+	1840	protein_coding	- && sp|P50246|SAHH_MEDSA Adenosylhomocysteinase OS=Medicago sativa OX=3879 GN=SAHH PE=2 SV=1 && PF05221:S-adenosyl-L-homocysteine hydrolase|PF00670:S-adenosyl-L-homocysteine hydrolase, NAD binding domain	-
CSS0049392	1530.22	1552.24	1573.59	261.193	259	299.25	1552.02	273.148	2.50738	6.887e-172	4.19426e-170	CSS0049392	Chr11	69869011	69873875	+	1911	protein_coding	- && sp|Q8L7Y9|NPC1_ARATH Non-specific phospholipase C1 OS=Arabidopsis thaliana OX=3702 GN=NPC1 PE=2 SV=1 && PF04185:Phosphoesterase family	Phosphoesterase
CSS0002589	2333.96	2237.68	2203.22	625.393	603.698	593.61	2258.29	607.567	1.89381	2.56246e-171	1.55827e-169	CSS0002589	Chr8	115314879	115317604	+	801	protein_coding	- && - && -	-
CSS0017841	78.2669	63.8687	45.1795	3273.19	3268.92	3900.03	62.4383	3480.71	-5.80376	3.824e-171	2.32201e-169	CSS0017841	Chr12	99836603	99837438	+	836	protein_coding	- && sp|P14009|14KD_DAUCA 14 kDa proline-rich protein DC2.15 OS=Daucus carota OX=4039 PE=2 SV=1 && PF14547:Hydrophobic seed protein	-
CSS0046202	522.783	522.354	555.611	2070.23	2209.12	2127.02	533.583	2135.46	-1.99976	2.93774e-170	1.77862e-168	CSS0046202	Chr8	36464284	36473463	+	3624	protein_coding	- && sp|O80386|CIP7_ARATH COP1-interacting protein 7 OS=Arabidopsis thaliana OX=3702 GN=CIP7 PE=1 SV=1 && -	-
CSS0014299	1740.94	1576.19	1596.66	232.683	283.757	276.757	1637.93	264.399	2.6325	3.35429e-170	2.02785e-168	CSS0014299	Chr9	67925292	67929873	+	1640	protein_coding	- && sp|O49286|SKP2B_ARATH F-box protein SKP2B OS=Arabidopsis thaliana OX=3702 GN=SKP2B PE=1 SV=1 && -	-
CSS0049452	92.3148	108.349	89.3977	1099.04	1053.14	1102.14	96.687	1084.77	-3.4938	4.28418e-170	2.58623e-168	CSS0049452	Chr8	84053904	84067327	-	3504	protein_coding	- && sp|Q9FL28|FLS2_ARATH LRR receptor-like serine/threonine-protein kinase FLS2 OS=Arabidopsis thaliana OX=3702 GN=FLS2 PE=1 SV=1 && PF00069:Protein kinase domain|PF13855:Leucine rich repeat|PF08263:Leucine rich repeat N-terminal domain	Pkinase
CSS0019639	536.83	659.216	599.829	2485.94	2433.84	2441.92	598.625	2453.9	-2.03776	1.01655e-169	6.12767e-168	CSS0019639	Chr3	15080510	15092132	-	1907	protein_coding	- && sp|Q9LEB3|RBP47_NICPL Polyadenylate-binding protein RBP47 OS=Nicotiana plumbaginifolia OX=4092 GN=RBP47 PE=1 SV=1 && PF00076:RNA recognition motif. (a.k.a. RRM, RBD, or RNP domain)	RRM_1
CSS0005888	2315.9	2217.16	2024.42	499.394	498.955	456.698	2185.83	485.016	2.1713	1.894e-169	1.14002e-167	CSS0005888	Chr6	161545512	161547247	+	462	protein_coding	- && sp|Q6NM26|DI196_ARATH Protein DEHYDRATION-INDUCED 19 homolog 6 OS=Arabidopsis thaliana OX=3702 GN=DI19-6 PE=1 SV=1 && PF14571:Stress-induced protein Di19, C-terminal	-
CSS0011780	3.01026	6.84307	6.72886	5815.23	6014.13	6000.65	5.5274	5943.33	-10.0798	2.23168e-169	1.34131e-167	CSS0011780	Chr1	183777940	183781332	+	1632	protein_coding	- && sp|Q8LER3|XTH7_ARATH Probable xyloglucan endotransglucosylase/hydrolase protein 7 OS=Arabidopsis thaliana OX=3702 GN=XTH7 PE=2 SV=2 && PF06955:Xyloglucan endo-transglycosylase (XET) C-terminus|PF00722:Glycosyl hydrolases family 16	-
CSS0004845	2696.19	2659.67	2556.97	809.332	814.135	762.794	2637.61	795.42	1.72895	2.54594e-169	1.52797e-167	CSS0004845	Contig874	385012	407162	-	759	protein_coding	- && sp|Q9ZUU2|PXL2C_ARATH Thioredoxin-like protein AAED1, chloroplastic OS=Arabidopsis thaliana OX=3702 GN=At2g37240 PE=1 SV=2 && PF13911:AhpC/TSA antioxidant enzyme	-
CSS0044727	58.1984	86.6789	113.429	1406.21	1255.01	1319.24	86.1022	1326.82	-3.9422	2.91332e-169	1.74592e-167	CSS0044727	Chr11	4112671	4123138	+	2034	protein_coding	- && sp|O22898|LACS1_ARATH Long chain acyl-CoA synthetase 1 OS=Arabidopsis thaliana OX=3702 GN=LACS1 PE=2 SV=1 && PF00501:AMP-binding enzyme	AMP-binding
CSS0016802	2098.15	1983.35	2104.21	455.249	498.003	418.559	2061.9	457.27	2.17284	3.00237e-169	1.79668e-167	CSS0016802	Chr9	95007531	95016118	+	1304	protein_coding	- && sp|Q8GXL7|GAT24_ARATH GATA transcription factor 24 OS=Arabidopsis thaliana OX=3702 GN=GATA24 PE=1 SV=2 && PF06203:CCT motif|PF00320:GATA zinc finger|PF06200:tify domain	CCT
CSS0050036	1572.36	1603.56	1678.37	329.251	308.514	316.853	1618.1	318.206	2.34618	3.90647e-169	2.33433e-167	CSS0050036	Chr2	44780737	44783117	+	892	protein_coding	- && - && PF00903:Glyoxalase/Bleomycin resistance protein/Dioxygenase superfamily	Glyoxalase
CSS0001909	2040.96	2106.53	1979.25	332.01	430.397	341.301	2042.24	367.903	2.47274	7.06524e-169	4.21577e-167	CSS0001909	Contig410	17646	28564	+	1364	protein_coding	- && sp|G7JT50|AGUA_MEDTR Agmatine deiminase OS=Medicago truncatula OX=3880 GN=AIH PE=1 SV=2 && PF04371:Porphyromonas-type peptidyl-arginine deiminase	-
CSS0014846	27.0924	13.6861	26.9154	1078.8	1071.23	1137.35	22.5646	1095.79	-5.57762	7.97352e-169	4.75086e-167	CSS0014846	Contig567	380801	385441	-	2069	protein_coding	- && sp|Q5XEP9|KCS2_ARATH 3-ketoacyl-CoA synthase 2 OS=Arabidopsis thaliana OX=3702 GN=KCS2 PE=2 SV=2 && PF08392:FAE1/Type III polyketide synthase-like protein|PF08541:3-Oxoacyl-[acyl-carrier-protein (ACP)] synthase III C terminal	-
novel.2584	970.308	926.096	888.209	48.7438	44.7536	45.9632	928.204	46.4869	4.31873	1.3859e-168	8.24572e-167	-	Chr14	47956597	47969663	+	7148	-	- && sp|Q9LRW7|IDD11_ARATH Protein indeterminate-domain 11 OS=Arabidopsis thaliana OX=3702 GN=IDD11 PE=2 SV=1 && -	-
CSS0007834	980.343	968.295	1012.21	80.9332	68.5587	80.1912	986.95	76.561	3.68831	1.41613e-168	8.41341e-167	CSS0007834	Chr9	74887035	74890828	-	879	protein_coding	- && sp|Q8VZG8|MIK2_ARATH MDIS1-interacting receptor like kinase 2 OS=Arabidopsis thaliana OX=3702 GN=MIK2 PE=1 SV=3 && PF00069:Protein kinase domain	Pkinase
CSS0004711	6070.7	6454.16	6291.48	2906.24	2926.13	2803.76	6272.11	2878.71	1.12314	8.64121e-168	5.11914e-166	CSS0004711	Chr9	13941349	13945401	-	1018	protein_coding	- && sp|Q9ZT66|E134_MAIZE Endo-1,3;1,4-beta-D-glucanase OS=Zea mays OX=4577 PE=1 SV=1 && PF01738:Dienelactone hydrolase family	-
CSS0041645	177.606	220.119	233.587	1650.85	1495.91	1488.43	210.437	1545.06	-2.87666	1.52903e-167	9.04518e-166	CSS0041645	Chr9	17395225	17396980	+	711	protein_coding	- && sp|F6HDT7|MTND2_VITVI 1,2-dihydroxy-3-keto-5-methylthiopentene dioxygenase 2 OS=Vitis vinifera OX=29760 GN=VIT_05s0020g04080 PE=3 SV=1 && PF03079:ARD/ARD' family	-
novel.1273	69.2361	65.0092	49.9858	970.278	1009.34	1032.71	61.4104	1004.11	-4.03656	2.21184e-167	1.30657e-165	-	Chr11	64379620	64388950	+	707	-	- && - && PF01439:Metallothionein	-
CSS0041387	20.0684	25.0913	12.4964	1222.27	1115.03	1235.14	19.2187	1190.82	-5.9766	2.44334e-167	1.44126e-165	CSS0041387	Chr7	22741228	22742909	-	1487	protein_coding	- && sp|A0A3Q7HH64|JA2L_SOLLC NAC domain-containing protein JA2L OS=Solanum lycopersicum OX=4081 GN=JA2L PE=2 SV=1 && PF02365:No apical meristem (NAM) protein	NAM
CSS0025785	916.124	878.194	989.142	2925.55	2967.07	3048.24	927.82	2980.29	-1.68177	3.49926e-167	2.06117e-165	CSS0025785	Chr2	211960779	211967101	-	3110	protein_coding	- && sp|P10691|SUS1_SOLTU Sucrose synthase OS=Solanum tuberosum OX=4113 PE=2 SV=1 && PF00862:Sucrose synthase|PF00534:Glycosyl transferases group 1	Glycos_transf_1
CSS0047051	370.262	387.774	460.446	2003.1	2123.42	1999.89	406.161	2042.13	-2.32768	3.72757e-167	2.19252e-165	CSS0047051	Chr10	63792664	63798618	-	2827	protein_coding	- && sp|Q9SJA4|CNG14_ARATH Probable cyclic nucleotide-gated ion channel 14 OS=Arabidopsis thaliana OX=3702 GN=CNGC14 PE=2 SV=2 && PF00027:Cyclic nucleotide-binding domain|PF00520:Ion transport protein	Ion_trans
CSS0010065	280.958	333.03	276.844	1634.3	1694.92	1812.12	296.944	1713.78	-2.53284	1.0876e-166	6.38807e-165	CSS0010065	Chr2	48468611	48469406	-	796	protein_coding	- && - && PF03018:Dirigent-like protein	-
CSS0035345	4473.25	4453.7	3997.9	1499.1	1429.26	1523.63	4308.28	1484	1.53725	1.33291e-166	7.81781e-165	CSS0035345	Chr9	68330917	68331303	+	387	protein_coding	- && - && -	-
CSS0017189	4827.46	4774.18	4869.77	2141.97	1997.73	2030.21	4823.8	2056.63	1.22977	4.63233e-166	2.7131e-164	CSS0017189	Chr13	111897173	111903600	+	1433	protein_coding	- && sp|P19446|MDHG_CITLA Malate dehydrogenase, glyoxysomal OS=Citrullus lanatus OX=3654 PE=1 SV=1 && PF02866:lactate/malate dehydrogenase, alpha/beta C-terminal domain|PF00056:lactate/malate dehydrogenase, NAD binding domain	-
CSS0025527	1743.95	1683.4	1697.59	342.127	379.93	330.544	1708.31	350.867	2.28355	6.36795e-166	3.72435e-164	CSS0025527	Chr2	211934481	211954978	+	5580	protein_coding	- && sp|P38295|MCFS2_YEAST Medium-chain fatty acid ethyl ester synthase/esterase 2 OS=Saccharomyces cerevisiae (strain ATCC 204508 / S288c) OX=559292 GN=EHT1 PE=1 SV=1 && -	-
CSS0001214	5908.15	6260.27	6069.43	2783.92	2810.91	2656.09	6079.28	2750.3	1.14386	1.03188e-165	6.02652e-164	CSS0001214	Chr1	115309888	115312866	+	1068	protein_coding	- && - && -	-
CSS0010160	1115.8	1205.52	1262.14	148.991	130.452	138.868	1194.49	139.437	3.09812	2.46909e-165	1.43999e-163	CSS0010160	Chr13	76387663	76390104	-	546	protein_coding	- && sp|Q0JG75|PSB28_ORYSJ Photosystem II reaction center PSB28 protein, chloroplastic OS=Oryza sativa subsp. japonica OX=39947 GN=PSB28 PE=2 SV=2 && PF03912:Psb28 protein	-
CSS0010972	33.1129	30.7938	25.9542	1040.18	947.444	1133.43	29.9536	1040.35	-5.12179	3.2623e-165	1.89991e-163	CSS0010972	Chr1	40592342	40595214	-	2873	protein_coding	- && sp|Q9LY50|ACCR3_ARATH Putative serine/threonine-protein kinase-like protein CCR3 OS=Arabidopsis thaliana OX=3702 GN=CCR3 PE=2 SV=1 && PF00069:Protein kinase domain	Pkinase
CSS0015277	2339.98	2263.92	2250.32	614.356	604.65	665	2284.74	628.002	1.86367	9.0287e-165	5.25076e-163	CSS0015277	Chr10	4441799	4445524	-	1771	protein_coding	- && sp|Q8LJW3|ACR4_ARATH ACT domain-containing protein ACR4 OS=Arabidopsis thaliana OX=3702 GN=ACR4 PE=2 SV=1 && PF01842:ACT domain	ACT
CSS0024181	172.588	187.044	148.996	1255.38	1295	1288.93	169.543	1279.77	-2.92107	9.21003e-165	5.34868e-163	CSS0024181	Chr11	9351628	9359921	-	5128	protein_coding	- && sp|Q9LZJ5|AB14C_ARATH ABC transporter C family member 14 OS=Arabidopsis thaliana OX=3702 GN=ABCC14 PE=1 SV=1 && PF00005:ABC transporter|PF00664:ABC transporter transmembrane region	ABC_membrane
CSS0021952	1832.25	1933.17	1923.49	468.125	438.966	457.676	1896.3	454.923	2.05917	1.29174e-164	7.4912e-163	CSS0021952	Chr4	177802186	177812792	+	1762	protein_coding	- && sp|O43030|FES1_SCHPO Hsp70 nucleotide exchange factor fes1 OS=Schizosaccharomyces pombe (strain 972 / ATCC 24843) OX=284812 GN=fes1 PE=1 SV=1 && PF08609:Nucleotide exchange factor Fes1	-
CSS0014504	8781.94	9130.94	8296.68	4197.49	4187.8	4086.82	8736.52	4157.37	1.07088	4.36661e-164	2.52878e-162	CSS0014504	Chr8	11352002	11355069	-	1002	protein_coding	- && sp|P54260|GCST_SOLTU Aminomethyltransferase, mitochondrial OS=Solanum tuberosum OX=4113 GN=GDCST PE=2 SV=1 && PF01571:Aminomethyltransferase folate-binding domain|PF08669:Glycine cleavage T-protein C-terminal barrel domain	GCV_T
CSS0013384	2135.28	1986.77	2083.06	510.431	525.617	545.691	2068.37	527.246	1.97277	6.21465e-164	3.59397e-162	CSS0013384	Chr6	138173801	138175954	+	2154	protein_coding	- && sp|Q66GP4|PP379_ARATH Pentatricopeptide repeat-containing protein At5g13770, chloroplastic OS=Arabidopsis thaliana OX=3702 GN=At5g13770 PE=2 SV=1 && PF13812:Pentatricopeptide repeat domain	-
CSS0019942	1644.61	1626.37	1515.92	315.455	319.941	310.985	1595.63	315.46	2.33816	6.75872e-164	3.90314e-162	CSS0019942	Contig194	9388	26524	-	3090	protein_coding	- && sp|Q9HCG7|GBA2_HUMAN Non-lysosomal glucosylceramidase OS=Homo sapiens OX=9606 GN=GBA2 PE=1 SV=2 && PF04685:Glycosyl-hydrolase family 116, catalytic region|PF12215:beta-glucosidase 2, glycosyl-hydrolase family 116 N-term	-
CSS0030191	918.131	956.89	980.491	25.7515	39.9926	49.875	951.837	38.5397	4.63342	7.04026e-164	4.06005e-162	CSS0030191	Chr12	125448926	125453749	-	3099	protein_coding	- && sp|C0LGP4|Y3475_ARATH Probable LRR receptor-like serine/threonine-protein kinase At3g47570 OS=Arabidopsis thaliana OX=3702 GN=At3g47570 PE=2 SV=1 && PF00069:Protein kinase domain|PF13855:Leucine rich repeat|PF08263:Leucine rich repeat N-terminal domain	Pkinase
CSS0027319	593.022	614.736	623.861	2267.05	2179.6	2183.74	610.54	2210.13	-1.85606	8.64384e-164	4.97786e-162	CSS0027319	Chr13	67697561	67700534	-	1289	protein_coding	- && sp|P50156|TIP11_ORYSJ Probable aquaporin TIP1-1 OS=Oryza sativa subsp. japonica OX=39947 GN=TIP1-1 PE=2 SV=1 && PF00230:Major intrinsic protein	-
CSS0008317	27.0924	47.9015	33.6443	1041.09	940.778	990.654	36.2127	990.842	-4.79095	1.315e-163	7.56234e-162	CSS0008317	Chr2	80445367	80453157	+	2081	protein_coding	- && sp|Q27GI3|NAT6_ARATH Nucleobase-ascorbate transporter 6 OS=Arabidopsis thaliana OX=3702 GN=NAT6 PE=2 SV=2 && PF00860:Permease family	-
CSS0007571	2698.2	2728.1	2662.7	886.586	889.359	911.441	2696.34	895.795	1.58973	6.83004e-163	3.92238e-161	CSS0007571	Contig543	360310	371270	-	2213	protein_coding	- && sp|Q9LF97|Y3295_ARATH CBS domain-containing protein CBSCBSPB3 OS=Arabidopsis thaliana OX=3702 GN=CBSCBSPB3 PE=1 SV=1 && PF00564:PB1 domain|PF00571:CBS domain	CBS
CSS0021676	843.877	712.82	791.121	2791.27	2791.86	2696.18	782.606	2759.77	-1.8162	8.28218e-163	4.74972e-161	CSS0021676	Chr6	60802467	60814555	-	1998	protein_coding	- && sp|Q9SQI3|FATB_GOSHI Palmitoyl-acyl carrier protein thioesterase, chloroplastic OS=Gossypium hirsutum OX=3635 GN=FATB1 PE=1 SV=1 && PF12590:Acyl-ATP thioesterase|PF01643:Acyl-ACP thioesterase	-
novel.7554	8.02737	14.8267	23.0704	1242.51	1251.2	1281.1	15.3081	1258.27	-6.3492	9.25263e-163	5.29889e-161	-	Chr8	26083482	26312925	-	3876	-	- && sp|B9RXW0|TPS7_RICCO Alpha-farnesene synthase OS=Ricinus communis OX=3988 GN=TPS7 PE=1 SV=2 && PF01397:Terpene synthase, N-terminal domain|PF03936:Terpene synthase family, metal binding domain	-
novel.7749	998.404	913.55	941.079	68.0574	55.2279	46.9412	951.011	56.7422	4.0634	1.20283e-162	6.87896e-161	-	Chr9	15012166	15016916	+	908	-	- && - && PF02298:Plastocyanin-like domain	Cu_bind_like
novel.6955	91.3113	100.365	88.4364	1028.22	1045.52	997.5	93.3709	1023.75	-3.45855	2.16219e-162	1.23484e-160	-	Chr7	153905636	153908961	+	591	-	- && - && -	-
CSS0038751	979.339	934.079	887.248	28.5105	20.9485	35.2059	933.555	28.2216	5.05016	2.57085e-162	1.4662e-160	CSS0038751	Chr6	67107000	67108857	+	1858	protein_coding	- && - && -	-
CSS0018653	4163.2	4181.12	4005.59	1677.52	1615.89	1702.6	4116.63	1665.34	1.30545	7.88278e-162	4.4833e-160	CSS0018653	Chr1	28140193	28144223	-	2528	protein_coding	- && sp|P09189|HSP7C_PETHY Heat shock cognate 70 kDa protein OS=Petunia hybrida OX=4102 GN=HSP70 PE=2 SV=1 && PF00012:Hsp70 protein	HSP70
CSS0042383	937.196	1000.23	1000.68	77.2544	88.555	68.4559	979.367	78.0884	3.64763	2.65819e-161	1.50976e-159	CSS0042383	Chr10	34216023	34220812	-	2105	protein_coding	- && sp|Q9C6L8|ALMT4_ARATH Aluminum-activated malate transporter 4 OS=Arabidopsis thaliana OX=3702 GN=ALMT4 PE=3 SV=1 && PF11744:Aluminium activated malate transporter	-
CSS0009863	1449.94	1494.07	1561.09	296.142	282.805	279.691	1501.7	286.213	2.3912	4.79338e-161	2.71873e-159	CSS0009863	Chr2	9034429	9040695	+	2569	protein_coding	- && sp|Q9FLD5|ASD_ARATH AAA-ATPase ASD, mitochondrial OS=Arabidopsis thaliana OX=3702 GN=AATP1 PE=1 SV=1 && PF14363:Domain associated at C-terminal with AAA|PF00004:ATPase family associated with various cellular activities (AAA)	AAA
CSS0010557	3236.03	3211.68	3254.84	1236.07	1192.16	1199.93	3234.19	1209.39	1.41906	8.83553e-161	5.0045e-159	CSS0010557	Chr11	80197116	80201924	+	1994	protein_coding	- && sp|Q8RXE8|BASS3_ARATH Probable sodium/metabolite cotransporter BASS3, chloroplastic OS=Arabidopsis thaliana OX=3702 GN=BASS3 PE=2 SV=1 && PF01758:Sodium Bile acid symporter family	-
CSS0033924	1079.68	1101.73	1028.55	114.042	106.647	126.154	1069.99	115.614	3.21064	1.05158e-160	5.94803e-159	CSS0033924	Chr3	176057931	176066479	-	1538	protein_coding	- && sp|Q6R0H0|RVE3_ARATH Protein REVEILLE 3 OS=Arabidopsis thaliana OX=3702 GN=RVE3 PE=2 SV=1 && PF00249:Myb-like DNA-binding domain	Myb_DNA-binding
CSS0041105	2699.2	2415.6	2722.3	626.312	714.154	631.75	2612.37	657.405	1.99125	1.09195e-160	6.16795e-159	CSS0041105	Contig123	290451	293836	+	2605	protein_coding	- && sp|Q9LI74|CHUP1_ARATH Protein CHUP1, chloroplastic OS=Arabidopsis thaliana OX=3702 GN=CHUP1 PE=1 SV=1 && -	-
CSS0011848	669.282	638.687	687.305	2294.64	2297.67	2413.56	665.091	2335.29	-1.81059	1.29816e-160	7.32271e-159	CSS0011848	Chr7	19915609	19920879	-	1974	protein_coding	- && sp|O81832|Y4729_ARATH G-type lectin S-receptor-like serine/threonine-protein kinase At4g27290 OS=Arabidopsis thaliana OX=3702 GN=At4g27290 PE=3 SV=4 && PF01453:D-mannose binding lectin|PF00954:S-locus glycoprotein domain|PF08276:PAN-like domain|PF00069:Protein kinase domain|PF11883:Domain of unknown function (DUF3403)	B_lectin
CSS0011901	47.1608	31.9343	55.7534	1039.26	983.628	926.11	44.9495	982.998	-4.43421	2.05308e-160	1.15496e-158	CSS0011901	Chr2	191308634	191312814	+	3384	protein_coding	- && sp|Q9ZV48|TPS11_ARATH Probable alpha,alpha-trehalose-phosphate synthase [UDP-forming] 11 OS=Arabidopsis thaliana OX=3702 GN=TPS11 PE=2 SV=1 && PF00982:Glycosyltransferase family 20|PF02358:Trehalose-phosphatase	-
CSS0036608	665.268	653.513	671.924	2298.32	2578.57	2428.23	663.569	2435.04	-1.87505	2.76298e-160	1.5522e-158	CSS0036608	Chr10	37689640	37691877	-	991	protein_coding	- && - && -	-
CSS0017601	185.633	232.664	173.989	1510.14	1414.98	1388.68	197.429	1437.93	-2.87149	3.44621e-160	1.93339e-158	CSS0017601	Chr14	49209432	49209939	-	453	protein_coding	- && sp|Q6NNI8|SAP1_ARATH Zinc finger A20 and AN1 domain-containing stress-associated protein 1 OS=Arabidopsis thaliana OX=3702 GN=SAP1 PE=1 SV=1 && PF01428:AN1-like Zinc finger|PF01754:A20-like zinc finger	zf-A20
CSS0007548	193.66	205.292	180.718	1247.11	1337.85	1284.04	193.223	1289.66	-2.74141	6.21659e-159	3.48289e-157	CSS0007548	Contig1100	63493	67964	-	1767	protein_coding	- && sp|Q9FKL6|CB60B_ARATH Calmodulin-binding protein 60 B OS=Arabidopsis thaliana OX=3702 GN=CBP60B PE=2 SV=1 && PF07887:Calmodulin binding protein-like	-
CSS0020622	830.833	907.848	870.906	2901.64	2687.12	2797.89	869.862	2795.55	-1.68534	8.08767e-159	4.52504e-157	CSS0020622	Chr7	26890079	26892375	-	2231	protein_coding	- && sp|Q8LPR5|TCP4_ARATH Transcription factor TCP4 OS=Arabidopsis thaliana OX=3702 GN=TCP4 PE=1 SV=1 && PF03634:TCP family transcription factor	TCP
CSS0044488	2658.06	2870.67	2788.63	874.63	916.973	876.235	2772.45	889.279	1.64015	8.21327e-159	4.5891e-157	CSS0044488	Chr7	132979756	132988370	-	708	protein_coding	- && sp|Q42540|UBC7_ARATH Ubiquitin-conjugating enzyme E2 7 OS=Arabidopsis thaliana OX=3702 GN=UBC7 PE=1 SV=1 && PF00179:Ubiquitin-conjugating enzyme	UQ_con
CSS0000908	112.383	119.754	84.5913	1170.77	1076.94	1121.7	105.576	1123.14	-3.41878	1.09216e-158	6.09408e-157	CSS0000908	Chr7	142183621	142188035	-	1128	protein_coding	- && - && -	-
CSS0010069	1711.84	1908.08	1707.21	385.352	370.408	359.882	1775.71	371.881	2.25428	1.19038e-158	6.6332e-157	CSS0010069	Chr2	102733906	102740592	+	1769	protein_coding	- && - && PF07712:Stress up-regulated Nod 19	-
CSS0022708	4256.51	4278.06	4285.32	1815.48	1655.88	1742.69	4273.3	1738.02	1.2977	1.52906e-158	8.50896e-157	CSS0022708	Chr14	10749833	10761827	-	1843	protein_coding	- && sp|O64843|CID7_ARATH Polyadenylate-binding protein-interacting protein 7 OS=Arabidopsis thaliana OX=3702 GN=CID7 PE=1 SV=1 && PF01713:Smr domain|PF08590:Domain of unknown function (DUF1771)	Smr
CSS0010306	2048.99	2101.96	2185.92	10.1166	4.76102	7.82353	2112.29	7.56707	8.11985	3.5289e-158	1.96113e-156	CSS0010306	Chr2	115386168	115387780	+	555	protein_coding	- && sp|Q38832|IAA14_ARATH Auxin-responsive protein IAA14 OS=Arabidopsis thaliana OX=3702 GN=IAA14 PE=1 SV=2 && PF02309:AUX/IAA family	-
CSS0040139	964.288	866.789	948.769	67.1377	55.2279	49.875	926.615	57.4135	4.00998	4.404e-158	2.44416e-156	CSS0040139	Chr15	97937501	97940313	-	1955	protein_coding	- && sp|Q9LMX7|C78A5_ARATH Cytochrome P450 78A5 OS=Arabidopsis thaliana OX=3702 GN=CYP78A5 PE=2 SV=1 && PF00067:Cytochrome P450	p450
CSS0017190	123.421	133.44	136.5	1094.44	1100.75	1083.56	131.12	1092.91	-3.05938	1.28216e-157	7.10628e-156	CSS0017190	Chr7	61732332	61734620	+	1221	protein_coding	- && sp|H2DH21|C7A29_PANGI Cytochrome P450 CYP72A219 OS=Panax ginseng OX=4054 PE=2 SV=1 && PF00067:Cytochrome P450	p450
CSS0041175	893.045	994.526	926.66	56.1014	37.136	31.2941	938.077	41.5105	4.4911	1.91071e-157	1.05758e-155	CSS0041175	Chr1	69650835	69654155	+	3192	protein_coding	- && - && PF08263:Leucine rich repeat N-terminal domain|PF13855:Leucine rich repeat	LRRNT_2
CSS0033421	41.1403	47.9015	41.3344	896.703	888.407	879.169	43.4587	888.093	-4.35864	1.22739e-156	6.7845e-155	CSS0033421	Chr6	82757838	82763089	+	2134	protein_coding	- && sp|Q9SUP6|WRK53_ARATH Probable WRKY transcription factor 53 OS=Arabidopsis thaliana OX=3702 GN=WRKY53 PE=1 SV=1 && PF03106:WRKY DNA -binding domain	WRKY
CSS0019715	4098.98	4187.96	3846.98	1595.67	1515.91	1512.87	4044.64	1541.49	1.39099	1.74103e-156	9.61079e-155	CSS0019715	Chr6	69421642	69432279	+	1296	protein_coding	- && sp|Q9FR37|AMI1_ARATH Amidase 1 OS=Arabidopsis thaliana OX=3702 GN=AMI1 PE=1 SV=1 && PF01425:Amidase	Amidase
CSS0004623	1009.44	1058.4	1092.96	73.5756	76.1764	108.551	1053.6	86.1011	3.61669	1.97144e-156	1.08682e-154	CSS0004623	Chr14	14734121	14743556	+	4751	protein_coding	- && sp|H6WS93|PDR1_PETAX Pleiotropic drug resistance protein 1 OS=Petunia axillaris OX=33119 GN=PDR1 PE=2 SV=1 && PF00005:ABC transporter|PF14510:ABC-transporter N-terminal|PF01061:ABC-2 type transporter|PF08370:Plant PDR ABC transporter associated	ABC2_membrane
CSS0008835	256.876	309.079	343.172	1706.95	1713.97	1719.22	303.042	1713.38	-2.49859	4.63911e-156	2.55404e-154	CSS0008835	Chr15	11509269	11511363	+	2095	protein_coding	- && sp|Q9MT28|THRC_SOLTU Threonine synthase, chloroplastic OS=Solanum tuberosum OX=4113 PE=2 SV=1 && PF00291:Pyridoxal-phosphate dependent enzyme	PALP
CSS0043177	530.81	609.033	599.829	2160.36	2326.24	2257.09	579.891	2247.9	-1.95557	1.28883e-155	7.08619e-154	CSS0043177	Chr6	8550076	8555212	+	2722	protein_coding	- && sp|Q9C5S1|MKP1_ARATH Protein-tyrosine-phosphatase MKP1 OS=Arabidopsis thaliana OX=3702 GN=MKP1 PE=1 SV=1 && PF00782:Dual specificity phosphatase, catalytic domain	DSPc
CSS0050103	2457.38	2502.28	2434.88	8.27725	4.76102	6.84559	2464.85	6.62796	8.53484	2.34116e-155	1.28378e-153	CSS0050103	Chr4	6173210	6177812	+	1633	protein_coding	- && sp|Q9SGS2|HMGB9_ARATH High mobility group B protein 9 OS=Arabidopsis thaliana OX=3702 GN=HMGB9 PE=1 SV=1 && PF09011:HMG-box domain|PF01388:ARID/BRIGHT DNA binding domain	ARID
CSS0023667	3381.53	3458.03	3644.16	1189.17	1288.33	1162.77	3494.57	1213.42	1.52618	5.55105e-155	3.0399e-153	CSS0023667	Chr12	92850124	92870287	+	1898	protein_coding	- && sp|P46248|AAT5_ARATH Aspartate aminotransferase, chloroplastic OS=Arabidopsis thaliana OX=3702 GN=ASP5 PE=1 SV=2 && PF00155:Aminotransferase class I and II	Aminotran_1_2
CSS0026531	217.742	226.962	220.13	1293.09	1384.51	1296.75	221.611	1324.78	-2.58049	1.6215e-154	8.86801e-153	CSS0026531	Chr14	59803336	59804833	+	795	protein_coding	- && sp|O03982|HIP39_ARATH Heavy metal-associated isoprenylated plant protein 39 OS=Arabidopsis thaliana OX=3702 GN=HIPP39 PE=2 SV=1 && PF00403:Heavy-metal-associated domain	HMA
CSS0044081	1248.26	1252.28	1194.85	148.071	190.441	168.206	1231.8	168.906	2.86729	1.84976e-154	1.0103e-152	CSS0044081	Chr3	50707186	50709027	-	1700	protein_coding	- && sp|Q9ZP55|DRP4C_ARATH Dynamin-related protein 4C OS=Arabidopsis thaliana OX=3702 GN=DRP4C PE=2 SV=1 && PF01031:Dynamin central region|PF00350:Dynamin family|PF02212:Dynamin GTPase effector domain	-
CSS0048682	3814	3467.16	3657.61	1370.35	1295.95	1294.79	3646.26	1320.36	1.46567	4.76496e-154	2.59907e-152	CSS0048682	Chr1	221854588	221878717	+	2130	protein_coding	- && sp|Q9S850|SUOX_ARATH Sulfite oxidase OS=Arabidopsis thaliana OX=3702 GN=SOX PE=1 SV=1 && PF00174:Oxidoreductase molybdopterin binding domain|PF01435:Peptidase family M48|PF03404:Mo-co oxidoreductase dimerisation domain	Peptidase_M48
CSS0041640	875.987	896.442	953.575	23.9121	15.2353	29.3382	908.668	22.8285	5.31745	5.32669e-154	2.90164e-152	CSS0041640	Chr6	35539932	35543255	-	1680	protein_coding	- && sp|Q8W3P8|AOG_PHAAN Abscisate beta-glucosyltransferase OS=Phaseolus angularis OX=3914 GN=AOG PE=1 SV=1 && PF00201:UDP-glucoronosyl and UDP-glucosyl transferase	UDPGT
CSS0044064	16.0547	19.3887	22.1091	979.475	1023.62	1032.71	19.1842	1011.93	-5.71861	7.56725e-154	4.11673e-152	CSS0044064	Chr7	24038478	24039719	-	1047	protein_coding	- && sp|A0A3Q7HH64|JA2L_SOLLC NAC domain-containing protein JA2L OS=Solanum lycopersicum OX=4081 GN=JA2L PE=2 SV=1 && PF02365:No apical meristem (NAM) protein	NAM
CSS0023147	2086.11	2025.55	1987.9	4919.45	4867.67	5369.87	2033.19	5052.33	-1.31312	9.2092e-154	5.00338e-152	CSS0023147	Chr4	33975183	33979331	+	3651	protein_coding	- && sp|Q9Y7K5|YGI3_SCHPO Uncharacterized WD repeat-containing protein C2A9.03 OS=Schizosaccharomyces pombe (strain 972 / ATCC 24843) OX=284812 GN=SPBC2A9.03 PE=4 SV=2 && -	-
CSS0017788	2307.87	2392.79	2401.24	696.209	748.433	686.515	2367.3	710.386	1.73647	1.19118e-153	6.46323e-152	CSS0017788	Contig40	537295	548341	+	501	protein_coding	- && - && -	-
CSS0004583	41.1403	33.0748	49.9858	910.498	899.834	868.412	41.4003	892.914	-4.4182	1.21479e-153	6.58268e-152	CSS0004583	Chr2	38400152	38400840	+	689	protein_coding	- && sp|Q41495|ST14_SOLTU STS14 protein OS=Solanum tuberosum OX=4113 GN=STS14 PE=2 SV=1 && PF00188:Cysteine-rich secretory protein family	SCP
CSS0042731	475.622	555.429	467.175	2039.88	2151.03	2063.46	499.409	2084.79	-2.06487	1.35229e-153	7.31812e-152	CSS0042731	Chr7	9304089	9310720	+	2682	protein_coding	- && sp|Q6NPD7|NUD10_ARATH Nudix hydrolase 10 OS=Arabidopsis thaliana OX=3702 GN=NUDT10 PE=1 SV=1 && PF00293:NUDIX domain|PF18290:Nudix hydrolase domain	NUDIX
CSS0029159	3305.27	3218.52	3222.16	1226.87	1240.72	1269.37	3248.65	1245.65	1.38319	2.67643e-153	1.4465e-151	CSS0029159	Chr3	2265741	2278124	-	1697	protein_coding	- && sp|Q5SR56|MF14B_HUMAN Hippocampus abundant transcript-like protein 1 OS=Homo sapiens OX=9606 GN=MFSD14B PE=1 SV=3 && PF07690:Major Facilitator Superfamily	MFS_1
CSS0007025	10.0342	9.1241	21.1478	1257.22	1226.44	1190.15	13.4354	1224.61	-6.48128	1.03183e-152	5.56934e-151	CSS0007025	Contig1039	552973	560582	+	1152	protein_coding	- && sp|Q0WPX7|BAG2_ARATH BAG family molecular chaperone regulator 2 OS=Arabidopsis thaliana OX=3702 GN=BAG2 PE=1 SV=1 && PF02179:BAG domain|PF00240:Ubiquitin family	ubiquitin
CSS0007210	243.831	245.21	198.021	1482.55	1397.84	1390.63	229.021	1423.67	-2.63971	1.24256e-152	6.69797e-151	CSS0007210	Contig793	83653	92690	+	4261	protein_coding	- && sp|Q9FL08|WTR42_ARATH WAT1-related protein At5g40240 OS=Arabidopsis thaliana OX=3702 GN=At5g40240 PE=2 SV=1 && PF00892:EamA-like transporter family	DUF6
CSS0002800	769.624	770.986	843.991	2647.8	2632.85	2502.55	794.867	2594.4	-1.70557	2.29004e-152	1.23283e-150	CSS0002800	Chr1	131090149	131098349	+	1779	protein_coding	- && sp|Q9LMX4|PPA1_ARATH Probable inactive purple acid phosphatase 1 OS=Arabidopsis thaliana OX=3702 GN=PAP1 PE=2 SV=1 && PF14008:Iron/zinc purple acid phosphatase-like protein C|PF17808:Fn3-like domain from Purple Acid Phosphatase|PF00149:Calcineurin-like phosphoesterase	Metallophos
CSS0019866	254.869	293.112	255.697	1488.07	1588.28	1428.77	267.892	1501.71	-2.49016	5.14628e-152	2.76686e-150	CSS0019866	Chr4	19797593	19802627	-	2228	protein_coding	- && - && -	-
CSS0024054	338.153	263.458	246.084	1684.88	1869.18	1908.94	282.565	1821	-2.68729	7.80392e-152	4.19027e-150	CSS0024054	Chr3	7420521	7423425	+	2905	protein_coding	- && sp|Q39827|SPE1_SOYBN Arginine decarboxylase OS=Glycine max OX=3847 PE=2 SV=1 && PF02784:Pyridoxal-dependent decarboxylase, pyridoxal binding domain	-
CSS0001281	1318.5	1330.98	1241.95	202.333	223.768	224.926	1297.14	217.009	2.57992	9.51887e-152	5.10446e-150	CSS0001281	Chr2	109842698	109844716	+	914	protein_coding	- && sp|Q9LVZ8|LOR12_ARATH Protein LURP-one-related 12 OS=Arabidopsis thaliana OX=3702 GN=At3g15810 PE=2 SV=1 && PF04525:LURP-one-related	-
CSS0047578	1601.46	1681.11	1603.39	371.557	380.882	354.993	1628.66	369.144	2.14077	1.19175e-151	6.38244e-150	CSS0047578	Contig86	512093	520108	-	2025	protein_coding	- && sp|Q9ZNX9|SIGE_ARATH RNA polymerase sigma factor sigE, chloroplastic/mitochondrial OS=Arabidopsis thaliana OX=3702 GN=SIGE PE=1 SV=1 && PF04542:Sigma-70 region 2|PF04545:Sigma-70, region 4|PF04539:Sigma-70 region 3	Sigma70_r4
CSS0027564	1214.14	1192.98	1301.55	198.654	184.728	168.206	1236.22	183.863	2.74847	3.479e-151	1.86077e-149	CSS0027564	Chr1	113088055	113089991	+	1861	protein_coding	- && sp|Q56WD3|UN931_ARATH UNC93-like protein 1 OS=Arabidopsis thaliana OX=3702 GN=At1g18000 PE=2 SV=2 && PF05978:Ion channel regulatory protein UNC-93	-
CSS0036978	1225.18	1195.26	1113.15	151.75	176.158	147.669	1177.86	158.526	2.89301	3.72123e-151	1.98776e-149	CSS0036978	Chr4	156165508	156170372	-	1226	protein_coding	- && sp|Q9LSS4|TET4_ARATH Tetraspanin-4 OS=Arabidopsis thaliana OX=3702 GN=TET4 PE=3 SV=1 && PF00335:Tetraspanin family	Tetraspannin
novel.9470	2733.32	2766.88	2909.75	969.359	948.396	974.029	2803.32	963.928	1.54042	3.72677e-151	1.98814e-149	-	Contig682	98933	104958	+	1490	-	- && sp|Q84Y18|CXIP4_ARATH CAX-interacting protein 4 OS=Arabidopsis thaliana OX=3702 GN=CXIP4 PE=1 SV=2 && -	-
CSS0026382	262.896	280.566	363.358	1784.21	1847.28	1974.46	302.274	1868.65	-2.62458	3.7808e-151	2.01436e-149	CSS0026382	Chr6	22397644	22401220	+	1040	protein_coding	- && - && -	-
CSS0019385	1032.52	950.047	929.543	16.5545	13.3309	20.5368	970.704	16.8074	5.85465	6.11417e-151	3.25335e-149	CSS0019385	Chr4	9466713	9471635	+	1419	protein_coding	- && sp|O65782|C83B1_ARATH Cytochrome P450 83B1 OS=Arabidopsis thaliana OX=3702 GN=CYP83B1 PE=1 SV=1 && PF00067:Cytochrome P450	p450
CSS0035109	3061.44	3072.54	3052.98	1160.66	1157.88	1098.23	3062.32	1138.92	1.42664	1.08024e-150	5.74057e-149	CSS0035109	Chr8	156744227	156751961	-	2626	protein_coding	- && sp|Q9FYH7|VSR6_ARATH Vacuolar-sorting receptor 6 OS=Arabidopsis thaliana OX=3702 GN=VSR6 PE=2 SV=3 && PF02225:PA domain	-
CSS0010071	650.217	664.919	645.009	2181.52	2207.21	2147.56	653.382	2178.76	-1.73812	1.24262e-150	6.59498e-149	CSS0010071	Chr11	112311548	112318183	+	2956	protein_coding	- && sp|O50008|METE1_ARATH 5-methyltetrahydropteroyltriglutamate--homocysteine methyltransferase 1 OS=Arabidopsis thaliana OX=3702 GN=MS1 PE=1 SV=1 && PF08267:Cobalamin-independent synthase, N-terminal domain|PF01717:Cobalamin-independent synthase, Catalytic domain	-
CSS0045144	334.139	353.559	292.225	1631.54	1627.32	1583.29	326.641	1614.05	-2.30829	1.49287e-150	7.91298e-149	CSS0045144	Chr2	35701594	35710309	-	3077	protein_coding	- && sp|Q9C5H5|M3K5G_ARATH Mitogen-activated protein kinase kinase kinase 5 OS=Arabidopsis thaliana OX=3702 GN=MAPKKK5 PE=1 SV=1 && PF00069:Protein kinase domain	Pkinase
CSS0049890	2898.88	3038.32	2907.83	1076.04	1073.13	1052.26	2948.35	1067.15	1.46565	1.84374e-150	9.76025e-149	CSS0049890	Chr3	35284141	35287268	-	1686	protein_coding	- && sp|Q9FEP7|SUT13_ARATH Sulfate transporter 1.3 OS=Arabidopsis thaliana OX=3702 GN=SULTR1;3 PE=2 SV=1 && PF00916:Sulfate permease family	Sulfate_transp
CSS0009658	1903.49	1782.62	1966.75	4580.08	4601.05	4437.9	1884.29	4539.68	-1.26738	1.89343e-150	1.00105e-148	CSS0009658	Chr12	133190168	133199118	+	2326	protein_coding	- && sp|Q94EJ6|PMTE_ARATH Probable methyltransferase PMT14 OS=Arabidopsis thaliana OX=3702 GN=At4g18030 PE=2 SV=1 && PF03141:Putative S-adenosyl-L-methionine-dependent methyltransferase	-
CSS0016246	39.1334	67.2902	54.7921	959.242	956.966	887.97	53.7386	934.726	-4.13125	2.44003e-150	1.28838e-148	CSS0016246	Chr2	197082620	197091770	-	2009	protein_coding	- && sp|O24146|4CL2_TOBAC 4-coumarate--CoA ligase 2 OS=Nicotiana tabacum OX=4097 GN=4CL2 PE=1 SV=1 && PF00501:AMP-binding enzyme|PF13193:AMP-binding enzyme C-terminal domain	AMP-binding
CSS0045180	30.1026	21.6697	19.2253	962.001	897.929	914.375	23.6659	924.768	-5.28741	2.45016e-150	1.29208e-148	CSS0045180	Chr8	149038469	149040475	-	2007	protein_coding	- && sp|O64743|BBE15_ARATH Berberine bridge enzyme-like 15 OS=Arabidopsis thaliana OX=3702 GN=MEE23 PE=1 SV=1 && PF08031:Berberine and berberine like|PF01565:FAD binding domain	FAD_binding_4
CSS0004212	43.1471	46.761	44.2182	904.06	816.992	925.132	44.7088	882.061	-4.30449	3.62566e-150	1.90953e-148	CSS0004212	Chr4	179438777	179441161	+	2265	protein_coding	- && sp|P17801|KPRO_MAIZE Putative receptor protein kinase ZmPK1 OS=Zea mays OX=4577 GN=PK1 PE=2 SV=2 && PF00069:Protein kinase domain|PF01453:D-mannose binding lectin|PF00954:S-locus glycoprotein domain	Pkinase
CSS0033608	689.351	695.712	744.981	2310.27	2361.47	2311.85	710.014	2327.86	-1.71218	3.93381e-150	2.06918e-148	CSS0033608	Chr9	94629011	94633868	+	1123	protein_coding	- && - && -	-
CSS0020737	1337.56	1244.3	1322.7	157.268	201.867	201.456	1301.52	186.864	2.80231	4.08493e-150	2.14594e-148	CSS0020737	Chr7	52752741	52755945	+	1402	protein_coding	- && - && PF05623:Protein of unknown function (DUF789)	-
CSS0039594	74.2532	82.1169	71.1336	918.775	1152.17	1034.66	75.8346	1035.2	-3.77476	4.79309e-150	2.51476e-148	CSS0039594	Chr9	7923425	7926117	+	808	protein_coding	- && - && -	-
CSS0049140	1372.68	1466.7	1332.31	3593.25	3768.83	3635.98	1390.56	3666.02	-1.39988	5.27398e-150	2.76355e-148	CSS0049140	Chr15	41895796	41900020	+	1950	protein_coding	- && sp|Q8VZG7|TSN1_ARATH Ribonuclease TUDOR 1 OS=Arabidopsis thaliana OX=3702 GN=TSN1 PE=1 SV=1 && PF00567:Tudor domain|PF00565:Staphylococcal nuclease homologue	-
CSS0008449	2010.86	2026.69	1924.45	534.343	514.191	464.522	1987.33	504.352	1.97727	8.08906e-150	4.23328e-148	CSS0008449	Chr1	143423562	143433820	+	2654	protein_coding	- && sp|Q8N9R8|SCAI_HUMAN Protein SCAI OS=Homo sapiens OX=9606 GN=SCAI PE=1 SV=2 && -	-
CSS0046247	3045.38	2996.13	3155.83	1106.39	1151.22	1089.43	3065.78	1115.68	1.45862	8.12506e-150	4.24673e-148	CSS0046247	Chr15	31552366	31554971	+	1717	protein_coding	- && - && -	-
CSS0006640	406.386	469.891	432.569	1788.81	1856.8	1924.59	436.282	1856.73	-2.09138	1.77376e-149	9.25921e-148	CSS0006640	Contig1254	877220	883658	-	2540	protein_coding	- && sp|Q9SSE5|COL9_ARATH Zinc finger protein CONSTANS-LIKE 9 OS=Arabidopsis thaliana OX=3702 GN=COL9 PE=1 SV=1 && PF06203:CCT motif	CCT
CSS0011209	2045.98	1882.99	1816.79	398.228	459.915	435.184	1915.25	431.109	2.15195	3.36598e-149	1.75486e-147	CSS0011209	Contig749	136327	168762	-	2851	protein_coding	- && sp|Q9M0Z3|KEA3_ARATH K(+) efflux antiporter 3, chloroplastic OS=Arabidopsis thaliana OX=3702 GN=KEA3 PE=1 SV=2 && PF00999:Sodium/hydrogen exchanger family|PF02254:TrkA-N domain	Na_H_Exchanger
CSS0020543	380.297	433.395	396.041	1743.74	1721.59	1702.6	403.244	1722.64	-2.09719	1.08338e-148	5.64109e-147	CSS0020543	Chr2	40829062	40837806	+	1790	protein_coding	- && sp|O64989|C90B1_ARATH Cytochrome P450 90B1 OS=Arabidopsis thaliana OX=3702 GN=CYP90B1 PE=1 SV=2 && PF00067:Cytochrome P450	p450
CSS0009976	143.489	138.002	145.151	1194.68	1068.37	1087.47	142.214	1116.84	-2.97221	6.83189e-148	3.55284e-146	CSS0009976	Chr10	164420940	164422323	+	1384	protein_coding	- && sp|O80582|FBK46_ARATH F-box/kelch-repeat protein At2g44130 OS=Arabidopsis thaliana OX=3702 GN=At2g44130 PE=2 SV=2 && PF01344:Kelch motif	Kelch_1
CSS0037547	6284.43	5847.41	6100.19	2931.99	2929.93	2870.26	6077.34	2910.73	1.06235	9.23405e-148	4.79602e-146	CSS0037547	Chr4	1238719	1266070	-	3504	protein_coding	- && sp|Q40983|SPP_PEA Stromal processing peptidase, chloroplastic OS=Pisum sativum OX=3888 GN=SPP PE=1 SV=2 && PF05193:Peptidase M16 inactive domain|PF00675:Insulinase (Peptidase family M16)	-
CSS0027999	116.397	100.365	92.2815	1131.22	974.106	1070.85	103.014	1058.73	-3.36188	1.23058e-147	6.38341e-146	CSS0027999	Chr11	45013375	45014648	-	1194	protein_coding	- && sp|D3U717|AROD3_PETHY Arogenate dehydratase 3 OS=Petunia hybrida OX=4102 GN=ADT3 PE=1 SV=1 && PF00800:Prephenate dehydratase	-
CSS0028444	468.598	554.289	563.301	2074.83	2197.69	2222.86	528.729	2165.13	-2.03435	1.35696e-147	7.03012e-146	CSS0028444	Contig1170	6532	12228	-	1605	protein_coding	- && sp|P22241|DRPD_CRAPL Desiccation-related protein PCC27-45 OS=Craterostigma plantagineum OX=4153 PE=2 SV=1 && PF03168:Late embryogenesis abundant protein	-
CSS0007030	96.3285	77.5548	82.6688	995.11	912.212	964.25	85.5174	957.191	-3.48137	1.85212e-147	9.58342e-146	CSS0007030	Chr15	39891104	39902561	-	3113	protein_coding	- && sp|P42762|CLPD_ARATH Chaperone protein ClpD, chloroplastic OS=Arabidopsis thaliana OX=3702 GN=CLPD PE=1 SV=1 && PF02861:Clp amino terminal domain, pathogenicity island component|PF10431:C-terminal, D2-small domain, of ClpB protein|PF07724:AAA domain (Cdc48 subfamily)|PF00004:ATPase family associated with various cellular activities (AAA)|PF17871:AAA lid domain	Clp_N
CSS0045839	209.715	163.093	192.253	1320.68	1323.56	1222.43	188.354	1288.89	-2.7703	1.88583e-147	9.74568e-146	CSS0045839	Chr5	152877858	152882649	-	1427	protein_coding	- && sp|Q8LAU9|GATA1_ARATH GATA transcription factor 1 OS=Arabidopsis thaliana OX=3702 GN=GATA1 PE=2 SV=2 && PF00320:GATA zinc finger	GATA
CSS0049326	31.1061	35.3559	25.9542	904.98	816.992	880.147	30.8054	867.373	-4.82545	2.8181e-147	1.45452e-145	CSS0049326	Chr2	67807794	67808909	+	1116	protein_coding	- && sp|Q9FX43|M2K9_ARATH Mitogen-activated protein kinase kinase 9 OS=Arabidopsis thaliana OX=3702 GN=MKK9 PE=1 SV=1 && PF00069:Protein kinase domain	Pkinase
CSS0012956	3509.97	3926.78	3599.94	1365.75	1319.76	1321.2	3678.9	1335.57	1.46105	4.08877e-147	2.10773e-145	CSS0012956	Chr9	68332700	68333050	+	351	protein_coding	- && sp|P48384|TRXM_PEA Thioredoxin M-type, chloroplastic OS=Pisum sativum OX=3888 PE=2 SV=1 && PF00085:Thioredoxin	-
CSS0010277	3507.96	3348.54	3715.29	1316.08	1304.52	1274.26	3523.93	1298.29	1.44105	6.6957e-147	3.44728e-145	CSS0010277	Chr8	159079575	159081480	+	922	protein_coding	- && sp|Q9SCY2|FKB13_ARATH Peptidyl-prolyl cis-trans isomerase FKBP13, chloroplastic OS=Arabidopsis thaliana OX=3702 GN=FKBP13 PE=1 SV=2 && PF00254:FKBP-type peptidyl-prolyl cis-trans isomerase	FKBP_C
CSS0028582	55.1882	41.0584	80.7463	1103.63	967.44	1001.41	58.9976	1024.16	-4.10073	1.50094e-146	7.71797e-145	CSS0028582	Chr1	18566557	18583136	+	2154	protein_coding	- && sp|Q9SCP2|PLY12_ARATH Probable pectate lyase 12 OS=Arabidopsis thaliana OX=3702 GN=At3g53190 PE=2 SV=2 && PF00544:Pectate lyase	-
CSS0032737	5116.45	4998.86	4989.93	2334.19	2402.41	2253.18	5035.08	2329.92	1.11165	1.67996e-146	8.62777e-145	CSS0032737	Chr2	83931629	83936067	-	1071	protein_coding	- && sp|Q8LR34|ISU1_ORYSJ Iron-sulfur cluster assembly protein 1 OS=Oryza sativa subsp. japonica OX=39947 GN=ISU1 PE=2 SV=1 && PF01592:NifU-like N terminal domain	-
CSS0041428	635.166	635.265	656.544	2261.53	2151.98	2123.11	642.325	2178.87	-1.7619	2.20565e-146	1.13135e-144	CSS0041428	Chr6	69460881	69464885	+	1131	protein_coding	- && sp|P46086|KIME_ARATH Mevalonate kinase OS=Arabidopsis thaliana OX=3702 GN=At5g27450 PE=2 SV=1 && PF00288:GHMP kinases N terminal domain|PF08544:GHMP kinases C terminal	GHMP_kinases
CSS0024710	1336.56	1184.99	1320.78	4696.88	3953.55	4098.55	1280.78	4249.66	-1.72928	2.24701e-146	1.15113e-144	CSS0024710	Chr3	5057924	5058893	-	970	protein_coding	- && sp|Q39613|CYPH_CATRO Peptidyl-prolyl cis-trans isomerase OS=Catharanthus roseus OX=4058 GN=PCKR1 PE=1 SV=1 && PF00160:Cyclophilin type peptidyl-prolyl cis-trans isomerase/CLD	Pro_isomerase
CSS0008941	1231.2	1117.7	1072.77	3321.94	3279.39	3235.03	1140.56	3278.79	-1.52346	4.10498e-146	2.10035e-144	CSS0008941	Chr7	29156509	29160835	+	2001	protein_coding	- && sp|Q54XK2|SC61A_DICDI Protein transport protein Sec61 subunit alpha OS=Dictyostelium discoideum OX=44689 GN=sec61a PE=3 SV=1 && PF10559:Plug domain of Sec61p|PF00344:SecY translocase	-
CSS0004306	47.1608	50.1825	65.366	838.762	895.073	924.154	54.2365	885.996	-4.0235	7.93234e-146	4.05364e-144	CSS0004306	Chr8	126319257	126321374	-	2118	protein_coding	- && - && -	-
CSS0043896	2194.48	2203.47	2184.96	691.611	693.205	656.198	2194.3	680.338	1.68909	8.0288e-146	4.09787e-144	CSS0043896	Chr4	135086977	135097400	+	1972	protein_coding	- && sp|O82390|ANTR1_ARATH Sodium-dependent phosphate transport protein 1, chloroplastic OS=Arabidopsis thaliana OX=3702 GN=ANTR1 PE=1 SV=1 && PF07690:Major Facilitator Superfamily	MFS_1
CSS0026500	1529.21	1637.78	1570.71	365.119	325.654	352.059	1579.23	347.611	2.183	3.71524e-145	1.8939e-143	CSS0026500	Chr2	11825380	11828775	+	2215	protein_coding	- && sp|Q93ZL5|CDF2_ARATH Cyclic dof factor 2 OS=Arabidopsis thaliana OX=3702 GN=CDF2 PE=1 SV=2 && PF02701:Dof domain, zinc finger	zf-Dof
CSS0008939	4988.01	4859.72	5254.28	2286.36	2204.35	2236.55	5034	2242.42	1.16701	5.42826e-145	2.76373e-143	CSS0008939	Chr2	107302939	107307995	+	1600	protein_coding	- && sp|O80449|JOX4_ARATH Jasmonate-induced oxygenase 4 OS=Arabidopsis thaliana OX=3702 GN=JOX4 PE=1 SV=1 && PF03171:2OG-Fe(II) oxygenase superfamily|PF14226:non-haem dioxygenase in morphine synthesis N-terminal	2OG-FeII_Oxy
CSS0048812	792.703	774.408	864.177	38.6272	27.6139	37.1618	810.429	34.4676	4.55512	1.1001e-144	5.59414e-143	CSS0048812	Contig815	78290	81194	+	2905	protein_coding	- && - && PF11145:Protein of unknown function (DUF2921)	-
CSS0015556	125.428	138.002	128.81	1113.75	1009.34	1043.46	130.746	1055.52	-3.01542	2.1804e-144	1.10739e-142	CSS0015556	Contig609	440577	442198	-	1464	protein_coding	- && sp|Q5W736|CIPKI_ORYSJ CBL-interacting protein kinase 18 OS=Oryza sativa subsp. japonica OX=39947 GN=CIPK18 PE=2 SV=1 && PF00069:Protein kinase domain|PF03822:NAF domain	Pkinase
CSS0010840	622.121	672.902	756.516	2467.54	2461.45	2441.92	683.846	2456.97	-1.84405	3.0313e-144	1.53766e-142	CSS0010840	Chr4	22870894	22871719	+	693	protein_coding	- && sp|O04354|CYB5_BOROF Cytochrome b5 OS=Borago officinalis OX=13363 PE=2 SV=1 && PF00173:Cytochrome b5-like Heme/Steroid binding domain	-
CSS0023867	76.26	83.2574	87.4751	901.301	961.727	887.97	82.3308	916.999	-3.47702	4.28471e-144	2.1708e-142	CSS0023867	Chr2	192197091	192205055	-	1971	protein_coding	- && sp|Q6YU51|DXS2_ORYSJ Probable 1-deoxy-D-xylulose-5-phosphate synthase 2, chloroplastic OS=Oryza sativa subsp. japonica OX=39947 GN=Os07g0190000 PE=2 SV=1 && PF02780:Transketolase, C-terminal domain|PF13292:1-deoxy-D-xylulose-5-phosphate synthase|PF02779:Transketolase, pyrimidine binding domain	-
CSS0030334	1683.74	1695.94	1765.84	279.587	374.216	309.029	1715.18	320.944	2.41875	1.08051e-143	5.46755e-142	CSS0030334	Chr3	183699717	183700510	+	794	protein_coding	- && sp|Q9ZUZ3|SAU32_ARATH Auxin-responsive protein SAUR32 OS=Arabidopsis thaliana OX=3702 GN=SAUR32 PE=2 SV=1 && PF02519:Auxin responsive protein	Auxin_inducible
CSS0009012	42.1437	57.0256	40.3731	850.718	812.231	863.522	46.5141	842.157	-4.1906	2.2958e-143	1.16029e-141	CSS0009012	Chr3	19156866	19158309	+	1383	protein_coding	- && sp|Q9AT54|SCGT_TOBAC Scopoletin glucosyltransferase OS=Nicotiana tabacum OX=4097 GN=TOGT1 PE=1 SV=1 && PF00201:UDP-glucoronosyl and UDP-glucosyl transferase	UDPGT
CSS0015470	1007.44	981.981	1156.4	122.319	106.647	100.728	1048.61	109.898	3.25335	2.74303e-143	1.38463e-141	CSS0015470	Chr4	29051567	29057905	-	1131	protein_coding	- && sp|Q9FZ95|PUP3_ARATH Purine permease 3 OS=Arabidopsis thaliana OX=3702 GN=PUP3 PE=2 SV=1 && PF16913:Purine nucleobase transmembrane transport	-
CSS0030091	120.411	110.63	109.584	1003.39	999.815	951.537	113.541	984.913	-3.11637	2.96917e-143	1.49695e-141	CSS0030091	Chr14	33802591	33806229	-	1132	protein_coding	- && sp|Q9ZVJ5|SGGP_ARATH Haloacid dehalogenase-like hydrolase domain-containing protein Sgpp OS=Arabidopsis thaliana OX=3702 GN=SGPP PE=1 SV=2 && PF13419:Haloacid dehalogenase-like hydrolase	-
CSS0045326	820.799	873.632	837.262	49.6635	23.8051	36.1838	843.898	36.5508	4.52427	3.92348e-143	1.97566e-141	CSS0045326	Chr15	31894606	31897986	-	1714	protein_coding	- && sp|Q949X0|ADS3_ARATH Palmitoyl-monogalactosyldiacylglycerol delta-7 desaturase, chloroplastic OS=Arabidopsis thaliana OX=3702 GN=ADS3 PE=1 SV=2 && PF00487:Fatty acid desaturase	-
CSS0043623	572.954	588.504	506.587	2029.77	2093.9	2080.08	556.015	2067.92	-1.89708	4.48586e-143	2.2561e-141	CSS0043623	Chr15	28951396	28952060	-	665	protein_coding	- && sp|Q9XI29|Y1540_ARATH Uncharacterized protein At1g15400 OS=Arabidopsis thaliana OX=3702 GN=At1g15400 PE=1 SV=2 && PF15697:Domain of unknown function (DUF4666)	-
CSS0024917	1485.06	1403.97	1516.88	248.318	299.945	289.471	1468.64	279.244	2.39638	5.38428e-143	2.70465e-141	CSS0024917	Chr2	92738745	92756153	+	1962	protein_coding	- && sp|P73577|Y889_SYNY3 Uncharacterized protein slr0889 OS=Synechocystis sp. (strain PCC 6803 / Kazusa) OX=1111708 GN=slr0889 PE=3 SV=1 && PF03109:ABC1 family	ABC1
CSS0018257	8.02737	2.28102	8.65139	2609.17	2419.55	2492.77	6.31993	2507.17	-8.58764	1.28224e-142	6.43316e-141	CSS0018257	Chr7	159250306	159251740	-	1435	protein_coding	- && sp|P17407|21KD_DAUCA 21 kDa protein OS=Daucus carota OX=4039 PE=2 SV=1 && PF04043:Plant invertase/pectin methylesterase inhibitor	-
CSS0023671	61.2087	50.1825	31.7218	865.433	913.164	901.662	47.7043	893.42	-4.2344	2.43115e-142	1.21826e-140	CSS0023671	Chr9	17712144	17716531	+	1758	protein_coding	- && sp|Q9LIK9|APS1_ARATH ATP sulfurylase 1, chloroplastic OS=Arabidopsis thaliana OX=3702 GN=APS1 PE=1 SV=1 && PF14306:PUA-like domain|PF01747:ATP-sulfurylase	-
CSS0034642	9156.22	10230.4	9665.52	4466.04	4781.02	4442.79	9684.04	4563.28	1.08523	2.7911e-142	1.39694e-140	CSS0034642	Chr9	153810457	153813157	-	997	protein_coding	- && sp|Q9SGS4|CDSP_ARATH Thioredoxin-like protein CDSP32, chloroplastic OS=Arabidopsis thaliana OX=3702 GN=CDSP32 PE=1 SV=1 && PF00085:Thioredoxin	-
CSS0044897	63.2155	67.2902	78.8237	869.112	852.223	893.838	69.7765	871.724	-3.63969	1.05945e-141	5.2961e-140	CSS0044897	Chr3	1813278	1814741	+	1464	protein_coding	- && sp|Q9SII5|EXOL5_ARATH Protein EXORDIUM-like 5 OS=Arabidopsis thaliana OX=3702 GN=EXL5 PE=2 SV=1 && PF04674:Phosphate-induced protein 1 conserved region	-
CSS0011795	807.754	882.756	856.487	2752.65	2524.29	2638.48	848.999	2638.48	-1.63678	1.98307e-141	9.90122e-140	CSS0011795	Chr6	10090694	10096779	-	1548	protein_coding	- && sp|Q9SGY2|ACLA1_ARATH ATP-citrate synthase alpha chain protein 1 OS=Arabidopsis thaliana OX=3702 GN=ACLA-1 PE=1 SV=1 && PF16114:ATP citrate lyase citrate-binding|PF08442:ATP-grasp domain	-
CSS0009844	90.3079	78.6953	91.3202	875.55	930.304	931	86.7745	912.284	-3.38965	2.91169e-141	1.45201e-139	CSS0009844	Chr7	167964058	167966791	-	1699	protein_coding	- && sp|Q0WUQ1|BAG1_ARATH BAG family molecular chaperone regulator 1 OS=Arabidopsis thaliana OX=3702 GN=BAG1 PE=1 SV=1 && PF02179:BAG domain|PF00240:Ubiquitin family	ubiquitin
CSS0022064	910.103	816.607	871.868	68.9771	79.9852	75.3015	866.192	74.7546	3.53588	3.73131e-141	1.8585e-139	CSS0022064	Chr12	117847846	117849267	-	1422	protein_coding	- && sp|Q940V3|U91A1_ARATH UDP-glycosyltransferase 91A1 OS=Arabidopsis thaliana OX=3702 GN=UGT91A1 PE=2 SV=1 && PF00201:UDP-glucoronosyl and UDP-glucosyl transferase	UDPGT
CSS0047801	1359.64	1562.5	1384.22	239.121	238.051	274.801	1435.45	250.658	2.51778	4.53922e-141	2.25818e-139	CSS0047801	Chr9	17070190	17073626	+	1146	protein_coding	- && - && -	-
CSS0047627	1908.51	1722.17	1809.1	463.526	438.966	408.779	1813.26	437.091	2.05231	5.28405e-141	2.62556e-139	CSS0047627	Chr9	52416015	52426685	+	2719	protein_coding	- && sp|Q9HCG7|GBA2_HUMAN Non-lysosomal glucosylceramidase OS=Homo sapiens OX=9606 GN=GBA2 PE=1 SV=2 && PF04685:Glycosyl-hydrolase family 116, catalytic region|PF12215:beta-glucosidase 2, glycosyl-hydrolase family 116 N-term	-
CSS0022907	26.089	13.6861	23.0704	928.892	830.323	947.625	20.9485	902.28	-5.40915	7.67998e-141	3.81146e-139	CSS0022907	Chr9	82098941	82099871	+	885	protein_coding	- && sp|Q9SKW5|ERF55_ARATH Ethylene-responsive transcription factor ERF055 OS=Arabidopsis thaliana OX=3702 GN=ERF055 PE=2 SV=1 && PF00847:AP2 domain	AP2
CSS0007446	433.478	437.957	434.492	1788.81	1675.88	1693.79	435.309	1719.49	-1.98219	9.82499e-141	4.87015e-139	CSS0007446	Chr2	191402865	191408007	-	4244	protein_coding	- && sp|Q9FHH2|SMAX1_ARATH Protein SUPPRESSOR OF MAX2 1 OS=Arabidopsis thaliana OX=3702 GN=SMAX1 PE=1 SV=1 && -	-
CSS0009961	1186.04	1080.06	1084.31	123.239	162.827	132.022	1116.81	139.363	3.00331	1.07719e-140	5.33313e-139	CSS0009961	Chr6	63056863	63057354	-	492	protein_coding	- && - && -	-
CSS0008497	18.0616	19.3887	4.80633	1125.71	1102.65	1023.9	14.0855	1084.09	-6.30015	1.27641e-140	6.31191e-139	CSS0008497	Chr9	158198395	158200127	-	903	protein_coding	- && sp|Q8LBB7|LOG5_ARATH Cytokinin riboside 5'-monophosphate phosphoribohydrolase LOG5 OS=Arabidopsis thaliana OX=3702 GN=LOG5 PE=1 SV=1 && PF03641:Possible lysine decarboxylase	-
CSS0023954	955.257	922.674	1016.06	108.524	100.934	119.309	964.663	109.589	3.13923	1.98395e-140	9.79898e-139	CSS0023954	Chr8	45273707	45291373	-	4005	protein_coding	- && sp|Q7X8C5|WAKLB_ARATH Wall-associated receptor kinase-like 2 OS=Arabidopsis thaliana OX=3702 GN=WAKL2 PE=2 SV=1 && -	-
CSS0037150	202.691	215.557	198.982	1208.48	1189.3	1180.37	205.743	1192.72	-2.53732	2.32335e-140	1.14616e-138	CSS0037150	Chr6	82883373	82885187	-	1815	protein_coding	- && sp|Q9AR73|HQGT_RAUSE Hydroquinone glucosyltransferase OS=Rauvolfia serpentina OX=4060 GN=AS PE=1 SV=1 && PF00201:UDP-glucoronosyl and UDP-glucosyl transferase	UDPGT
CSS0016927	1387.73	1378.88	1357.31	251.996	255.191	197.544	1374.64	234.91	2.54735	3.57821e-140	1.7631e-138	CSS0016927	Chr3	16073659	16076538	-	1098	protein_coding	- && sp|Q9M7Q4|AI5L5_ARATH ABSCISIC ACID-INSENSITIVE 5-like protein 5 OS=Arabidopsis thaliana OX=3702 GN=ABF2 PE=1 SV=1 && PF00170:bZIP transcription factor	bZIP_1
CSS0000184	1670.7	1677.69	1661.07	3822.25	3802.15	3969.46	1669.82	3864.62	-1.21068	3.65305e-140	1.79783e-138	CSS0000184	Chr7	176008001	176040415	-	2445	protein_coding	- && sp|P93604|LRK10_WHEAT Rust resistance kinase Lr10 OS=Triticum aestivum OX=4565 GN=LRK10 PE=2 SV=1 && PF13947:Wall-associated receptor kinase galacturonan-binding|PF00069:Protein kinase domain	Pkinase
CSS0025453	6015.51	6086.91	6499.11	2885.08	2926.13	3015.97	6200.51	2942.39	1.07583	3.87047e-140	1.90257e-138	CSS0025453	Contig1007	584423	585922	+	1500	protein_coding	- && sp|P29790|ATPG_TOBAC ATP synthase gamma chain, chloroplastic OS=Nicotiana tabacum OX=4097 GN=ATPC PE=1 SV=1 && PF00231:ATP synthase	-
CSS0014476	19.065	14.8267	4.80633	1056.73	1224.54	1211.67	12.8993	1164.31	-6.51652	4.51148e-140	2.21502e-138	CSS0014476	Chr13	78960684	78962002	-	865	protein_coding	- && sp|Q9SJX8|MYB14_ARATH Transcription factor MYB14 OS=Arabidopsis thaliana OX=3702 GN=MYB14 PE=2 SV=1 && PF00249:Myb-like DNA-binding domain	Myb_DNA-binding
CSS0039301	797.72	769.846	821.882	28.5105	28.5661	15.6471	796.482	24.2412	5.03236	5.65897e-140	2.77511e-138	CSS0039301	Chr1	180615022	180619675	-	636	protein_coding	- && sp|Q9LVH4|CAR4_ARATH Protein C2-DOMAIN ABA-RELATED 4 OS=Arabidopsis thaliana OX=3702 GN=CAR4 PE=1 SV=1 && PF00168:C2 domain	C2
CSS0043464	1606.48	1571.63	1539.95	262.113	284.709	194.61	1572.68	247.144	2.66828	8.56536e-140	4.1954e-138	CSS0043464	Chr7	136262652	136267119	-	2669	protein_coding	- && sp|Q8VZ40|PUB14_ARATH U-box domain-containing protein 14 OS=Arabidopsis thaliana OX=3702 GN=PUB14 PE=1 SV=1 && PF04564:U-box domain|PF00514:Armadillo/beta-catenin-like repeat	U-box
CSS0023649	2666.09	2689.33	2662.7	969.359	896.025	863.522	2672.71	909.635	1.55428	2.50415e-139	1.22511e-137	CSS0023649	Chr4	168860515	168867416	-	1831	protein_coding	- && sp|Q9LD95|SIGF_ARATH RNA polymerase sigma factor sigF, chloroplastic OS=Arabidopsis thaliana OX=3702 GN=SIGF PE=1 SV=1 && -	-
CSS0044834	1170.99	1148.5	1183.32	199.574	203.772	174.073	1167.6	192.473	2.60009	2.86495e-139	1.39996e-137	CSS0044834	Chr1	165247993	165253425	-	1092	protein_coding	- && sp|Q93V85|WTR16_ARATH WAT1-related protein At3g02690, chloroplastic OS=Arabidopsis thaliana OX=3702 GN=At3g02690 PE=1 SV=1 && PF00892:EamA-like transporter family	DUF6
CSS0033465	233.797	216.697	242.239	1278.38	1287.38	1226.34	230.911	1264.03	-2.45026	1.06255e-138	5.186e-137	CSS0033465	Chr8	119515187	119531817	-	4408	protein_coding	- && sp|F4HX15|LPAI_ARATH Phospholipase A I OS=Arabidopsis thaliana OX=3702 GN=PLA1 PE=3 SV=1 && PF13855:Leucine rich repeat|PF01734:Patatin-like phospholipase	-
CSS0028046	1536.24	1572.77	1394.8	292.463	324.702	303.162	1501.27	306.776	2.29056	1.86724e-138	9.10275e-137	CSS0028046	Chr8	124860564	124863247	+	1742	protein_coding	- && sp|Q9M0Y3|ENT3_ARATH Equilibrative nucleotide transporter 3 OS=Arabidopsis thaliana OX=3702 GN=ENT3 PE=1 SV=1 && PF01733:Nucleoside transporter	-
CSS0032777	36.1232	46.761	46.1407	786.339	970.297	851.787	43.0083	869.474	-4.34004	2.23664e-138	1.08907e-136	CSS0032777	Chr11	6673421	6689663	+	480	protein_coding	- && sp|A0A024B3G5|FRA16_FRAAN Major strawberry allergen Fra a 1.06 OS=Fragaria ananassa OX=3747 GN=Fra a 1.06 PE=1 SV=1 && PF00407:Pathogenesis-related protein Bet v I family	-
CSS0010317	931.175	972.857	999.716	92.8892	73.3198	111.485	967.916	92.5647	3.38786	2.68651e-138	1.30658e-136	CSS0010317	Chr7	28845132	28849422	-	1820	protein_coding	- && sp|Q9ZV88|BEH4_ARATH BES1/BZR1 homolog protein 4 OS=Arabidopsis thaliana OX=3702 GN=BEH4 PE=1 SV=1 && PF05687:BES1/BZR1 plant transcription factor, N-terminal	-
CSS0005154	658.244	704.836	686.343	2142.89	2257.68	2186.68	683.141	2195.75	-1.68514	5.4979e-138	2.67075e-136	CSS0005154	Chr6	2958781	2960252	-	1187	protein_coding	- && sp|Q9FY93|NAC83_ARATH NAC domain-containing protein 83 OS=Arabidopsis thaliana OX=3702 GN=NAC083 PE=1 SV=1 && PF02365:No apical meristem (NAM) protein	NAM
CSS0025054	42.1437	27.3723	21.1478	910.498	810.326	828.316	30.2213	849.713	-4.81405	1.25219e-137	6.07569e-136	CSS0025054	Chr9	152523866	152528918	-	918	protein_coding	- && sp|Q43872|PER64_ARATH Peroxidase 64 OS=Arabidopsis thaliana OX=3702 GN=PER64 PE=1 SV=1 && PF00141:Peroxidase	-
CSS0002812	1431.88	1406.25	1319.82	278.668	257.095	293.382	1385.98	276.382	2.32619	1.28394e-137	6.22244e-136	CSS0002812	Chr1	45783415	45794813	-	2617	protein_coding	- && sp|Q8RWG3|RER6_ARATH Protein RETICULATA-RELATED 6, chloroplastic OS=Arabidopsis thaliana OX=3702 GN=RER6 PE=2 SV=1 && PF11891:Protein RETICULATA-related	-
CSS0050113	823.809	778.97	820.92	21.153	14.2831	19.5588	807.9	18.3316	5.46061	4.06577e-137	1.96811e-135	CSS0050113	Chr5	16481214	16482106	+	708	protein_coding	- && sp|Q9SZ42|FAD4_ARATH Fatty acid desaturase 4, chloroplastic OS=Arabidopsis thaliana OX=3702 GN=FAD4 PE=1 SV=1 && PF10520:B domain of TMEM189, localisation domain	-
CSS0008677	256.876	252.053	282.612	1410.81	1315.95	1332.93	263.847	1353.23	-2.35672	8.36519e-137	4.04458e-135	CSS0008677	Chr11	87003899	87008202	+	2327	protein_coding	- && sp|F4KFT7|TENAC_ARATH Bifunctional TH2 protein, mitochondrial OS=Arabidopsis thaliana OX=3702 GN=TH2 PE=1 SV=1 && PF03070:TENA/THI-4/PQQC family	-
CSS0012824	161.551	166.515	163.415	1081.56	1112.18	1037.6	163.827	1077.11	-2.71759	3.69704e-136	1.78543e-134	CSS0012824	Chr12	112341088	112342607	+	1520	protein_coding	- && sp|O82199|C3H20_ARATH Zinc finger CCCH domain-containing protein 20 OS=Arabidopsis thaliana OX=3702 GN=At2g19810 PE=2 SV=1 && -	-
CSS0022837	91.3113	67.2902	81.7075	920.615	852.223	963.272	80.103	912.037	-3.50267	7.40083e-136	3.56995e-134	CSS0022837	Contig1140	342991	358487	-	2023	protein_coding	- && sp|Q94G86|ALL9_OLEEU Glucan endo-1,3-beta-D-glucosidase OS=Olea europaea OX=4146 GN=OLE9 PE=1 SV=1 && PF00332:Glycosyl hydrolases family 17|PF07983:X8 domain	Glyco_hydro_17
CSS0017820	1074.66	1113.14	1042.97	3142.6	3033.72	2863.41	1076.93	3013.24	-1.48549	9.43104e-136	4.54396e-134	CSS0017820	Chr3	55597541	55624733	+	1419	protein_coding	- && - && PF09459:Ethylbenzene dehydrogenase	-
novel.5303	3023.31	2957.35	3051.06	1062.25	1162.64	1030.75	3010.57	1085.21	1.47217	1.89852e-135	9.13658e-134	-	Chr4	144845488	144851296	-	1505	-	- && sp|Q84Y18|CXIP4_ARATH CAX-interacting protein 4 OS=Arabidopsis thaliana OX=3702 GN=CXIP4 PE=1 SV=2 && -	-
CSS0040096	16.0547	25.0913	24.0316	909.578	798.9	820.492	21.7259	842.99	-5.2842	4.65898e-135	2.23691e-133	CSS0040096	Chr10	160922037	160926512	-	2325	protein_coding	- && - && -	-
CSS0049008	2605.89	2807.94	2579.07	847.039	902.69	921.22	2664.3	890.317	1.58117	9.9064e-135	4.75082e-133	CSS0049008	Chr10	20628742	20650406	+	1211	protein_coding	- && sp|Q94JU2|WTR18_ARATH WAT1-related protein At3g28050 OS=Arabidopsis thaliana OX=3702 GN=At3g28050 PE=2 SV=1 && PF00892:EamA-like transporter family	DUF6
CSS0046450	2077.08	1897.81	2075.37	574.809	564.657	594.588	2016.76	578.018	1.80369	2.32341e-134	1.11294e-132	CSS0046450	Chr11	70677958	70679296	+	1339	protein_coding	- && sp|Q39963|PDX1_HEVBR Probable pyridoxal 5'-phosphate synthase subunit PDX1 OS=Hevea brasiliensis OX=3981 GN=PDX1 PE=2 SV=1 && PF01680:SOR/SNZ family	-
CSS0021818	764.607	821.169	801.695	27.5908	19.0441	11.7353	795.824	19.4567	5.34371	3.46527e-134	1.65799e-132	CSS0021818	Chr4	109615179	109618508	-	1733	protein_coding	- && sp|Q8VZ80|PLT5_ARATH Polyol transporter 5 OS=Arabidopsis thaliana OX=3702 GN=PLT5 PE=1 SV=2 && PF00083:Sugar (and other) transporter	Sugar_tr
novel.67	16.0547	15.9672	9.61265	936.249	993.15	1000.43	13.8782	976.611	-6.15111	4.22195e-134	2.01769e-132	-	Chr1	37071861	37417670	+	683	-	- && sp|A0A0S2PMA8|TCS1D_CAMTA Caffeine synthase 1 OS=Camellia taliensis OX=182317 GN=TCS1D PE=1 SV=1 && PF03492:SAM dependent carboxyl methyltransferase	-
CSS0021136	87.2977	90.1004	88.4364	946.366	838.892	888.948	88.6115	891.402	-3.33133	5.85767e-134	2.79617e-132	CSS0021136	Chr11	106423258	106428231	-	1028	protein_coding	- && - && PF02298:Plastocyanin-like domain	Cu_bind_like
CSS0009836	839.864	899.864	848.797	2446.39	2486.21	2475.17	862.842	2469.25	-1.51802	8.06381e-134	3.8404e-132	CSS0009836	Chr1	204915933	204921549	-	2165	protein_coding	- && sp|Q94KT8|COBRA_ARATH Protein COBRA OS=Arabidopsis thaliana OX=3702 GN=COB PE=2 SV=1 && PF04833:COBRA-like protein	-
CSS0025143	1236.22	1245.44	1314.05	254.756	229.481	214.169	1265.23	232.802	2.44128	8.58247e-134	4.0827e-132	CSS0025143	Chr1	138654463	138668784	+	1788	protein_coding	- && sp|Q9LX99|KN14A_ARATH Kinesin-like protein KIN-14A OS=Arabidopsis thaliana OX=3702 GN=KIN14A PE=1 SV=1 && PF00225:Kinesin motor domain	Kinesin
CSS0029680	1339.57	1332.12	1400.56	240.96	272.331	290.448	1357.42	267.913	2.34253	1.1907e-133	5.65767e-132	CSS0029680	Chr7	43684230	43691759	+	2268	protein_coding	- && - && -	-
CSS0033195	170.582	169.936	145.151	1076.04	1157.88	1065.96	161.89	1099.96	-2.76717	1.77564e-133	8.42734e-132	CSS0033195	Contig186	147255	152168	-	1517	protein_coding	- && sp|D7U6G6|ANRPN_VITVI Anthocyanidin reductase ((2S)-flavan-3-ol-forming) OS=Vitis vinifera OX=29760 GN=ANR PE=3 SV=1 && PF01370:NAD dependent epimerase/dehydratase family	Epimerase
CSS0029711	1074.66	1127.97	1097.76	134.275	179.015	154.515	1100.13	155.935	2.81955	2.07551e-133	9.83927e-132	CSS0029711	Contig1060	74542	77698	-	2040	protein_coding	- && sp|F8WKW1|UGT2_GARJA 7-deoxyloganetin glucosyltransferase OS=Gardenia jasminoides OX=114476 GN=UGT85A24 PE=1 SV=1 && PF00201:UDP-glucoronosyl and UDP-glucosyl transferase	UDPGT
CSS0045944	231.79	224.681	233.587	1311.49	1195.97	1224.38	230.02	1243.95	-2.43438	3.21509e-133	1.52067e-131	CSS0045944	Chr2	52594665	52600942	-	2214	protein_coding	- && sp|Q41438|HMDH3_SOLTU 3-hydroxy-3-methylglutaryl-coenzyme A reductase 3 OS=Solanum tuberosum OX=4113 GN=HMG3 PE=2 SV=1 && PF00368:Hydroxymethylglutaryl-coenzyme A reductase	-
CSS0025330	843.877	810.904	846.875	20.2333	6.66543	21.5147	833.885	16.1378	5.69153	3.69932e-133	1.7477e-131	CSS0025330	Chr7	99170395	99178773	-	1014	protein_coding	- && sp|Q1QVV7|MTNN_CHRSD 5'-methylthioadenosine/S-adenosylhomocysteine nucleosidase OS=Chromohalobacter salexigens (strain ATCC BAA-138 / DSM 3043 / CIP 106854 / NCIMB 13768 / 1H11) OX=290398 GN=mtnN PE=3 SV=1 && PF01048:Phosphorylase superfamily	-
CSS0041711	688.347	726.506	734.407	2269.81	2162.46	2229.71	716.42	2220.66	-1.6323	4.11066e-133	1.93981e-131	CSS0041711	Chr6	12870036	12883421	-	2407	protein_coding	- && sp|Q8RX77|PTR21_ARATH Protein NRT1/ PTR FAMILY 2.13 OS=Arabidopsis thaliana OX=3702 GN=NPF2.13 PE=1 SV=1 && PF00854:POT family	-
CSS0017538	2891.86	2829.61	2779.98	1092.6	1072.18	1110.94	2833.82	1091.91	1.37592	5.98203e-133	2.81968e-131	CSS0017538	Chr6	168916394	168919851	+	1886	protein_coding	- && sp|Q99JW2|ACY1_MOUSE Aminoacylase-1 OS=Mus musculus OX=10090 GN=Acy1 PE=1 SV=1 && PF01546:Peptidase family M20/M25/M40	Peptidase_M20
CSS0014916	1383.72	1264.83	1256.37	225.325	187.584	159.404	1301.64	190.771	2.76827	6.4124e-133	3.01909e-131	CSS0014916	Chr2	94537639	94539302	-	1465	protein_coding	- && sp|Q9FYF9|FB76_ARATH F-box protein At1g67340 OS=Arabidopsis thaliana OX=3702 GN=At1g67340 PE=1 SV=1 && PF01753:MYND finger	zf-MYND
CSS0034544	142.486	149.407	126.887	1112.83	1022.67	995.544	139.593	1043.68	-2.90604	8.21465e-133	3.86322e-131	CSS0034544	Chr9	15148016	15153304	-	1903	protein_coding	- && sp|Q9ZQR3|Y2451_ARATH Leucine-rich repeat receptor-like serine/threonine-protein kinase At2g14510 OS=Arabidopsis thaliana OX=3702 GN=At2g14510 PE=1 SV=1 && PF12819:Malectin-like domain	-
CSS0025095	741.528	733.349	720.949	22.9924	32.375	21.5147	731.942	25.6273	4.83567	9.12219e-133	4.28515e-131	CSS0025095	Chr1	203854414	203854688	+	186	protein_coding	- && - && -	-
novel.3448	911.107	913.55	884.364	13.7954	7.61764	16.625	903.007	12.6794	6.15626	1.11199e-132	5.21763e-131	-	Chr2	59387246	59390486	+	1582	-	- && sp|Q9ZRF1|MTDH_FRAAN Probable mannitol dehydrogenase OS=Fragaria ananassa OX=3747 GN=CAD PE=2 SV=1 && PF08240:Alcohol dehydrogenase GroES-like domain|PF00107:Zinc-binding dehydrogenase	ADH_zinc_N
CSS0006927	1696.79	1797.45	1679.33	3917.9	4207.79	4141.58	1724.52	4089.09	-1.24639	1.49056e-132	6.98603e-131	CSS0006927	Chr14	91628871	91634360	+	1217	protein_coding	- && sp|Q9SQR3|D14_ARATH Strigolactone esterase D14 OS=Arabidopsis thaliana OX=3702 GN=D14 PE=1 SV=1 && PF00561:alpha/beta hydrolase fold	Abhydrolase_1
CSS0017550	184.63	128.878	129.771	1283.89	1167.4	1176.46	147.759	1209.25	-3.03029	1.61358e-132	7.55401e-131	CSS0017550	Chr3	14200369	14201857	-	1489	protein_coding	- && sp|Q67YI6|ATL65_ARATH RING-H2 finger protein ATL65 OS=Arabidopsis thaliana OX=3702 GN=ATL65 PE=2 SV=2 && PF13639:Ring finger domain	-
CSS0047617	2261.71	2363.14	2385.86	788.179	812.231	772.573	2336.9	790.994	1.56272	1.74833e-132	8.17555e-131	CSS0047617	Chr13	112128747	112133599	-	840	protein_coding	- && sp|Q9FGF0|PGML1_ARATH Phosphoglycerate mutase-like protein 1 OS=Arabidopsis thaliana OX=3702 GN=At5g64460 PE=2 SV=1 && -	-
CSS0010016	1485.06	1548.82	1550.52	324.652	361.838	290.448	1528.13	325.646	2.22976	1.90434e-132	8.89504e-131	CSS0010016	Chr2	130337574	130341276	-	2536	protein_coding	- && sp|Q9LRW7|IDD11_ARATH Protein indeterminate-domain 11 OS=Arabidopsis thaliana OX=3702 GN=IDD11 PE=2 SV=1 && -	-
CSS0020376	45.154	37.6369	51.9083	839.682	781.76	746.169	44.8997	789.204	-4.12633	2.3022e-132	1.07413e-130	CSS0020376	Chr9	81636928	81640795	+	1212	protein_coding	- && sp|P33050|PSC13_MAIZE Pollen-specific protein C13 OS=Zea mays OX=4577 GN=MGS1 PE=2 SV=1 && -	-
novel.94	527.8	532.619	497.935	1903.77	1826.33	2039.98	519.451	1923.36	-1.88939	4.32788e-132	2.01696e-130	-	Chr1	53260145	53262810	+	2431	-	- && - && -	-
CSS0050084	1429.88	1349.23	1335.2	308.098	301.849	299.25	1371.43	303.066	2.17787	6.24265e-132	2.90603e-130	CSS0050084	Chr10	156227814	156241957	+	1497	protein_coding	- && sp|F4J2K2|FPGS2_ARATH Folylpolyglutamate synthase OS=Arabidopsis thaliana OX=3702 GN=FPGS2 PE=1 SV=1 && PF08245:Mur ligase middle domain	-
CSS0046773	690.354	726.506	723.833	31.2696	25.7095	30.3162	713.564	29.0984	4.61533	7.96021e-132	3.70141e-130	CSS0046773	Chr2	65922937	65931977	-	471	protein_coding	- && - && -	-
CSS0047911	2910.93	2961.91	2933.78	1156.98	1196.92	1149.08	2935.54	1167.66	1.32988	8.28819e-132	3.84958e-130	CSS0047911	Chr5	184916273	184922079	+	2903	protein_coding	- && sp|Q8VY21|TLP3_ARATH Tubby-like F-box protein 3 OS=Arabidopsis thaliana OX=3702 GN=TULP3 PE=1 SV=1 && PF00646:F-box domain|PF01167:Tub family	Tub
CSS0028472	1236.22	1277.37	1216.96	3107.65	3062.29	3055.09	1243.52	3075.01	-1.30697	1.93215e-131	8.96407e-130	CSS0028472	Chr7	27686876	27694184	-	3499	protein_coding	- && sp|Q9FV65|CAPPC_FLATR Phosphoenolpyruvate carboxylase 2 OS=Flaveria trinervia OX=4227 GN=PPCC PE=1 SV=1 && PF00311:Phosphoenolpyruvate carboxylase	-
CSS0010744	119.407	98.084	99.0103	949.125	895.073	930.022	105.5	924.74	-3.13004	2.98263e-131	1.38222e-129	CSS0010744	Chr6	57475696	57478923	+	1366	protein_coding	- && sp|Q93ZH9|HHP1_ARATH Heptahelical transmembrane protein 1 OS=Arabidopsis thaliana OX=3702 GN=HHP1 PE=1 SV=1 && PF03006:Haemolysin-III related	-
CSS0039928	2369.08	2470.35	2312.8	832.324	779.856	803.867	2384.08	805.349	1.56506	3.39367e-131	1.57094e-129	CSS0039928	Chr12	135667376	135672892	-	1905	protein_coding	- && sp|Q9ZQP1|TPMT1_ARATH Phosphatidylglycerophosphate phosphatase PTPMT1 OS=Arabidopsis thaliana OX=3702 GN=PTPMT1 PE=1 SV=2 && PF00782:Dual specificity phosphatase, catalytic domain	DSPc
CSS0038625	4170.22	3990.65	4055.58	1882.62	1838.71	1875.69	4072.15	1865.67	1.12628	8.29508e-131	3.83552e-129	CSS0038625	Chr15	4662187	4681586	+	3458	protein_coding	- && sp|Q43128|PMA10_ARATH ATPase 10, plasma membrane-type OS=Arabidopsis thaliana OX=3702 GN=AHA10 PE=2 SV=2 && PF00702:haloacid dehalogenase-like hydrolase|PF00690:Cation transporter/ATPase, N-terminus|PF00122:E1-E2 ATPase	E1-E2_ATPase
CSS0012399	722.463	801.78	706.53	2358.1	2277.67	2363.68	743.591	2333.15	-1.65184	1.31467e-130	6.07203e-129	CSS0012399	Chr12	101351266	101360913	-	3925	protein_coding	- && sp|O48946|CESA1_ARATH Cellulose synthase A catalytic subunit 1 [UDP-forming] OS=Arabidopsis thaliana OX=3702 GN=CESA1 PE=1 SV=1 && PF14569:Zinc-binding RING-finger|PF03552:Cellulose synthase	-
CSS0001546	451.54	544.024	502.742	2040.8	1874.89	1923.61	499.435	1946.43	-1.96462	1.73149e-130	7.98825e-129	CSS0001546	Chr9	44186988	44194290	-	1307	protein_coding	- && sp|Q9M1B9|SCRK4_ARATH Probable fructokinase-4 OS=Arabidopsis thaliana OX=3702 GN=At3g59480 PE=2 SV=1 && PF00294:pfkB family carbohydrate kinase	PfkB
CSS0022992	500.707	456.205	449.872	1706.95	1779.67	1816.04	468.928	1767.55	-1.91383	1.86731e-130	8.60528e-129	CSS0022992	Chr4	40080381	40084237	+	967	protein_coding	- && - && -	-
novel.5797	64.219	66.1497	93.2427	847.959	924.591	884.059	74.5371	885.536	-3.56284	3.2506e-130	1.49633e-128	-	Chr5	40253531	40259756	-	934	-	- && - && -	-
CSS0001267	2512.57	3006.39	3122.19	747.712	778.904	686.515	2880.38	737.71	1.96476	3.94906e-130	1.81582e-128	CSS0001267	Chr6	26540294	26541052	-	463	protein_coding	- && - && -	-
CSS0028467	854.915	835.995	849.758	2345.22	2393.84	2384.22	846.89	2374.43	-1.48695	1.24409e-129	5.71411e-128	CSS0028467	Chr11	75363983	75375282	+	3353	protein_coding	- && sp|C0LGD7|Y1684_ARATH Probable LRR receptor-like serine/threonine-protein kinase At1g06840 OS=Arabidopsis thaliana OX=3702 GN=At1g06840 PE=1 SV=2 && PF08263:Leucine rich repeat N-terminal domain|PF00069:Protein kinase domain	Pkinase
CSS0022893	388.324	415.146	413.344	1540.49	1607.32	1604.8	405.605	1584.2	-1.96598	2.3117e-129	1.06058e-127	CSS0022893	Chr9	3023428	3027995	+	1944	protein_coding	- && sp|B9DFA8|INVC_ARATH Alkaline/neutral invertase C, mitochondrial OS=Arabidopsis thaliana OX=3702 GN=INVC PE=1 SV=1 && PF12899:Alkaline and neutral invertase	-
novel.3062	1310.47	1332.12	1235.23	206.931	261.856	216.125	1292.6	228.304	2.50127	2.65781e-129	1.21802e-127	-	Chr15	56777152	56782274	+	5123	-	- && sp|O94514|NOP56_SCHPO Nucleolar protein 56 OS=Schizosaccharomyces pombe (strain 972 / ATCC 24843) OX=284812 GN=nop56 PE=3 SV=1 && -	-
CSS0023625	103.352	119.754	136.5	1090.76	965.536	983.809	119.869	1013.37	-3.0782	2.72179e-129	1.24596e-127	CSS0023625	Chr2	34394516	34395645	+	954	protein_coding	- && - && PF07939:Protein of unknown function (DUF1685)	-
CSS0037717	1929.58	1978.79	2055.19	530.664	603.698	583.831	1987.85	572.731	1.79596	3.34749e-129	1.53069e-127	CSS0037717	Chr11	94948582	94951806	+	942	protein_coding	- && sp|Q9ZNV9|AHP1_ARATH Histidine-containing phosphotransfer protein 1 OS=Arabidopsis thaliana OX=3702 GN=AHP1 PE=1 SV=1 && PF01627:Hpt domain	Hpt
CSS0042846	5135.51	5368.39	5434.03	2450.07	2629.99	2500.59	5312.64	2526.88	1.07213	5.03404e-129	2.29934e-127	CSS0042846	Chr7	36678041	36679786	-	1029	protein_coding	- && sp|Q03666|GSTX4_TOBAC Probable glutathione S-transferase OS=Nicotiana tabacum OX=4097 PE=2 SV=1 && PF13410:Glutathione S-transferase, C-terminal domain|PF02798:Glutathione S-transferase, N-terminal domain	GST_N
CSS0012171	2947.05	2766.88	2742.49	965.68	871.267	1003.37	2818.81	946.772	1.57421	5.72057e-129	2.61003e-127	CSS0012171	Chr15	71252358	71261147	+	3373	protein_coding	- && - && -	-
CSS0023274	5469.65	5305.66	5310.99	2590.78	2406.22	2633.59	5362.1	2543.53	1.07607	7.74162e-129	3.52825e-127	CSS0023274	Chr9	2536342	2540240	+	2045	protein_coding	- && sp|Q9M5K3|DLDH1_ARATH Dihydrolipoyl dehydrogenase 1, mitochondrial OS=Arabidopsis thaliana OX=3702 GN=LPD1 PE=1 SV=2 && PF07992:Pyridine nucleotide-disulphide oxidoreductase|PF02852:Pyridine nucleotide-disulphide oxidoreductase, dimerisation domain	Pyr_redox_2
CSS0030100	736.511	664.919	741.135	30.3499	22.8529	30.3162	714.188	27.8397	4.68147	1.10993e-128	5.05292e-127	CSS0030100	Chr5	129190760	129194147	-	1717	protein_coding	- && sp|O22822|U74F2_ARATH UDP-glycosyltransferase 74F2 OS=Arabidopsis thaliana OX=3702 GN=UGT74F2 PE=1 SV=1 && PF00201:UDP-glucoronosyl and UDP-glucosyl transferase	UDPGT
CSS0002875	5558.95	5339.88	5433.07	2667.12	2669.03	2462.46	5443.97	2599.53	1.0663	1.65317e-128	7.51772e-127	CSS0002875	Chr11	77384168	77390570	-	1170	protein_coding	- && sp|P42814|RNS2_ARATH Ribonuclease 2 OS=Arabidopsis thaliana OX=3702 GN=RNS2 PE=2 SV=1 && PF00445:Ribonuclease T2 family	Ribonuclease_T2
CSS0043312	2763.42	2669.94	2715.57	1064.09	995.054	1022.93	2716.31	1027.36	1.40268	1.68103e-128	7.63601e-127	CSS0043312	Chr1	167569976	167579283	-	2949	protein_coding	- && sp|Q84W41|GLR36_ARATH Glutamate receptor 3.6 OS=Arabidopsis thaliana OX=3702 GN=GLR3.6 PE=2 SV=1 && PF00497:Bacterial extracellular solute-binding proteins, family 3|PF01094:Receptor family ligand binding region|PF00060:Ligand-gated ion channel	ANF_receptor
novel.2065	820.799	679.745	764.206	40.4666	45.7058	46.9412	754.917	44.3712	4.091	1.69118e-128	7.6737e-127	-	Chr13	5826702	5831834	+	3968	-	- && sp|Q9LT75|PTN2A_ARATH Phosphatidylinositol 3,4,5-trisphosphate 3-phosphatase and protein-tyrosine-phosphatase PTEN2A OS=Arabidopsis thaliana OX=3702 GN=PTEN2A PE=1 SV=1 && -	-
CSS0029457	337.15	398.039	429.686	1814.56	1673.98	1737.8	388.291	1742.11	-2.16547	2.63798e-128	1.19566e-126	CSS0029457	Chr14	55692561	55695688	+	1708	protein_coding	- && sp|Q8H7U1|TBB2_ORYSJ Tubulin beta-2 chain OS=Oryza sativa subsp. japonica OX=39947 GN=TUBB2 PE=2 SV=1 && PF03953:Tubulin C-terminal domain|PF00091:Tubulin/FtsZ family, GTPase domain	Tubulin
CSS0020849	228.78	200.73	261.464	1325.28	1250.24	1327.07	230.325	1300.86	-2.49275	3.28598e-128	1.48773e-126	CSS0020849	Chr10	126870874	126876778	+	1345	protein_coding	- && sp|Q0PGJ6|AKRC9_ARATH NADPH-dependent aldo-keto reductase, chloroplastic OS=Arabidopsis thaliana OX=3702 GN=AKR4C9 PE=1 SV=1 && PF00248:Aldo/keto reductase family	Aldo_ket_red
CSS0043484	183.626	166.515	141.306	1076.96	1158.83	1084.54	163.816	1106.78	-2.75819	8.53661e-128	3.86073e-126	CSS0043484	Chr1	204187535	204192514	+	2047	protein_coding	- && sp|Q9LI61|AVT6A_ARATH Amino acid transporter AVT6A OS=Arabidopsis thaliana OX=3702 GN=AVT6A PE=2 SV=1 && PF01490:Transmembrane amino acid transporter protein	Aa_trans
CSS0012390	114.39	128.878	116.313	904.98	925.543	928.066	119.86	919.53	-2.94257	1.03584e-127	4.67954e-126	CSS0012390	Chr13	60269179	60270370	+	1192	protein_coding	- && sp|Q9ZSD4|SY121_ARATH Syntaxin-121 OS=Arabidopsis thaliana OX=3702 GN=SYP121 PE=1 SV=1 && PF05739:SNARE domain|PF00804:Syntaxin	SNARE
CSS0009497	1035.53	1075.5	1102.57	190.377	182.823	168.206	1071.2	180.469	2.56856	1.88901e-127	8.52449e-126	CSS0009497	Chr11	69167189	69171662	-	2799	protein_coding	- && - && -	-
CSS0024698	1.00342	4.56205	8.65139	3223.53	3141.32	3115.72	4.73895	3160.19	-9.36157	2.38422e-127	1.07475e-125	CSS0024698	Chr1	183578581	183582080	+	1537	protein_coding	- && sp|Q8LER3|XTH7_ARATH Probable xyloglucan endotransglucosylase/hydrolase protein 7 OS=Arabidopsis thaliana OX=3702 GN=XTH7 PE=2 SV=2 && PF00722:Glycosyl hydrolases family 16|PF06955:Xyloglucan endo-transglycosylase (XET) C-terminus	-
novel.2110	1540.25	1458.71	1634.15	277.748	342.794	335.434	1544.37	318.658	2.27862	2.49992e-127	1.12567e-125	-	Chr13	44675988	44725947	+	4387	-	- && - && -	-
CSS0024277	886.021	873.632	895.899	101.166	109.504	121.265	885.184	110.645	3.00173	3.06353e-127	1.37795e-125	CSS0024277	Chr7	30753669	30779675	-	2772	protein_coding	- && sp|C0LGG7|Y1534_ARATH Probable LRR receptor-like serine/threonine-protein kinase At1g53420 OS=Arabidopsis thaliana OX=3702 GN=At1g53420 PE=2 SV=2 && PF07714:Protein tyrosine kinase|PF11721:Malectin domain	Pkinase_Tyr
CSS0041367	2026.91	1994.76	1965.79	632.75	581.797	545.691	1995.82	586.746	1.76533	6.27548e-127	2.81959e-125	CSS0041367	Chr11	5753202	5754904	-	751	protein_coding	- && - && PF00582:Universal stress protein family	Usp
CSS0009571	93.3182	75.2738	80.7463	842.441	851.271	806.801	83.1128	833.504	-3.32286	1.11733e-126	5.01473e-125	CSS0009571	Chr11	81132592	81136321	-	3043	protein_coding	- && sp|Q9SRT0|PUB9_ARATH U-box domain-containing protein 9 OS=Arabidopsis thaliana OX=3702 GN=PUB9 PE=1 SV=1 && -	-
CSS0026380	3306.27	3575.51	3323.09	1404.37	1392.12	1368.14	3401.62	1388.21	1.2923	1.4393e-126	6.45279e-125	CSS0026380	Chr12	142010122	142015205	-	1568	protein_coding	- && - && PF10248:Myelodysplasia-myeloid leukemia factor 1-interacting protein	-
CSS0003998	1514.16	1458.71	1449.59	343.966	338.033	380.419	1474.16	354.139	2.05816	1.44565e-126	6.47423e-125	CSS0003998	Chr3	163516436	163519058	+	1544	protein_coding	- && sp|W8JMV1|CYT24_CATRO Cytochrome P450 76T24 OS=Catharanthus roseus OX=4058 GN=CYP76T24 PE=2 SV=1 && PF00067:Cytochrome P450	p450
CSS0043459	1871.38	1822.54	1850.44	581.247	553.231	566.228	1848.12	566.902	1.70487	2.14944e-126	9.61566e-125	CSS0043459	Chr15	105951494	105953362	+	1265	protein_coding	- && sp|Q9FNN6|SRM1_ARATH Transcription factor SRM1 OS=Arabidopsis thaliana OX=3702 GN=SRM1 PE=1 SV=1 && PF00249:Myb-like DNA-binding domain	Myb_DNA-binding
CSS0027046	211.722	183.622	246.084	1222.27	1259.77	1289.9	213.809	1257.32	-2.55031	2.62323e-126	1.17225e-124	CSS0027046	Chr15	71496705	71505554	-	1541	protein_coding	- && sp|Q9AWZ8|PANB1_ORYSJ 3-methyl-2-oxobutanoate hydroxymethyltransferase 1, mitochondrial OS=Oryza sativa subsp. japonica OX=39947 GN=KPHMT1 PE=2 SV=1 && -	-
CSS0003484	18.0616	25.0913	24.0316	742.194	863.65	738.345	22.3948	781.396	-5.12952	3.45876e-126	1.54395e-124	CSS0003484	Chr3	18977603	18982460	+	860	protein_coding	- && sp|O23193|CBSX1_ARATH CBS domain-containing protein CBSX1, chloroplastic OS=Arabidopsis thaliana OX=3702 GN=CBSX1 PE=1 SV=2 && PF00571:CBS domain	CBS
CSS0020704	1137.88	1123.4	1217.92	167.384	196.154	213.191	1159.74	192.243	2.59487	7.74988e-126	3.45573e-124	CSS0020704	Chr1	171091474	171148082	-	3614	protein_coding	- && sp|C0HJB3|MANA_CANEN Alpha-mannosidase OS=Canavalia ensiformis OX=3823 PE=1 SV=1 && PF09261:Alpha mannosidase middle domain|PF07748:Glycosyl hydrolases family 38 C-terminal domain|PF17677:Glycosyl hydrolases family 38 C-terminal beta sandwich domain|PF01074:Glycosyl hydrolases family 38 N-terminal domain	-
CSS0037714	1081.69	1161.04	1138.14	197.734	219.007	193.632	1126.96	203.458	2.46929	1.24306e-125	5.53691e-124	CSS0037714	Chr14	34336749	34343114	+	2426	protein_coding	- && sp|Q6LA43|APRR2_ARATH Two-component response regulator-like APRR2 OS=Arabidopsis thaliana OX=3702 GN=APRR2 PE=2 SV=2 && PF00249:Myb-like DNA-binding domain	Myb_DNA-binding
CSS0029434	6928.62	7439.56	7877.57	3496.68	3237.5	3419.86	7415.25	3384.68	1.1315	1.42975e-125	6.36163e-124	CSS0029434	Chr12	107013895	107015824	-	520	protein_coding	- && sp|Q8LEM8|RL373_ARATH 60S ribosomal protein L37-3 OS=Arabidopsis thaliana OX=3702 GN=RPL37C PE=3 SV=1 && -	-
CSS0037353	15.0513	9.1241	29.7992	811.171	823.657	796.044	17.9915	810.291	-5.45622	2.15108e-125	9.56086e-124	CSS0037353	Chr9	155650624	155661530	-	1500	protein_coding	- && sp|Q00624|ASOL_BRANA L-ascorbate oxidase homolog OS=Brassica napus OX=3708 GN=Bp10 PE=2 SV=1 && PF07732:Multicopper oxidase|PF00394:Multicopper oxidase|PF07731:Multicopper oxidase	-
CSS0027758	2006.84	1991.33	1908.11	637.349	622.742	599.478	1968.76	619.856	1.66671	3.52566e-125	1.56535e-123	CSS0027758	Chr4	29380292	29404389	+	2063	protein_coding	- && sp|Q9FKQ1|DTX27_ARATH Protein DETOXIFICATION 27 OS=Arabidopsis thaliana OX=3702 GN=DTX27 PE=2 SV=1 && PF01554:MatE	MatE
CSS0046370	58.1984	67.2902	67.2886	802.894	738.911	777.463	64.2591	773.089	-3.59001	4.07414e-125	1.80693e-123	CSS0046370	Chr7	133449026	133453200	+	1251	protein_coding	- && - && PF04784:Protein of unknown function, DUF547	-
CSS0011415	2902.9	2728.1	2756.91	1091.68	1089.32	1079.65	2795.97	1086.88	1.36332	5.52425e-125	2.44744e-123	CSS0011415	Chr9	108946585	108989242	+	2089	protein_coding	- && sp|A4GNA8|PSD3_ARATH Phosphatidylserine decarboxylase proenzyme 3 OS=Arabidopsis thaliana OX=3702 GN=PSD3 PE=1 SV=1 && PF02666:Phosphatidylserine decarboxylase|PF13499:EF-hand domain pair	-
CSS0001834	52.1779	42.1989	60.5597	721.041	794.139	769.64	51.6455	761.606	-3.87197	1.17206e-124	5.18152e-123	CSS0001834	Chr8	126919134	126920485	+	1260	protein_coding	- && sp|P0C8Q4|Y4990_ARATH Uncharacterized protein At4g19900 OS=Arabidopsis thaliana OX=3702 GN=At4g19900 PE=2 SV=1 && PF04488:Glycosyltransferase sugar-binding region containing DXD motif|PF04572:Alpha 1,4-glycosyltransferase conserved region	Gly_transf_sug
CSS0047599	645.2	764.143	715.181	23.9121	22.8529	22.4926	708.175	23.0859	4.93766	1.23122e-124	5.43724e-123	CSS0047599	Chr2	63493465	63498424	+	2494	protein_coding	- && sp|Q9LFU0|DOT3_ARATH BTB/POZ domain-containing protein DOT3 OS=Arabidopsis thaliana OX=3702 GN=DOT3 PE=2 SV=1 && PF03000:NPH3 family	-
CSS0006034	28.0958	21.6697	19.2253	811.171	735.102	707.051	22.9969	751.108	-5.02977	2.4935e-124	1.09999e-122	CSS0006034	Chr8	29914791	29920026	-	2562	protein_coding	- && sp|O64781|Y1639_ARATH G-type lectin S-receptor-like serine/threonine-protein kinase At1g61390 OS=Arabidopsis thaliana OX=3702 GN=At1g61390 PE=3 SV=1 && PF00954:S-locus glycoprotein domain|PF08276:PAN-like domain|PF01453:D-mannose binding lectin|PF07714:Protein tyrosine kinase	Pkinase_Tyr
CSS0049249	717.446	789.234	732.484	2252.33	2192.93	2216.99	746.388	2220.75	-1.57458	2.84552e-124	1.25394e-122	CSS0049249	Contig11	18632	25316	-	3041	protein_coding	- && sp|O50008|METE1_ARATH 5-methyltetrahydropteroyltriglutamate--homocysteine methyltransferase 1 OS=Arabidopsis thaliana OX=3702 GN=MS1 PE=1 SV=1 && PF08267:Cobalamin-independent synthase, N-terminal domain|PF01717:Cobalamin-independent synthase, Catalytic domain	-
CSS0022168	171.585	197.309	130.732	1287.57	1169.31	1184.29	166.542	1213.72	-2.87304	2.90974e-124	1.28088e-122	CSS0022168	Chr10	32566027	32567148	+	1122	protein_coding	- && sp|Q9ZWM9|RAV1_ARATH AP2/ERF and B3 domain-containing transcription factor RAV1 OS=Arabidopsis thaliana OX=3702 GN=RAV1 PE=1 SV=1 && PF02362:B3 DNA binding domain|PF00847:AP2 domain	B3
CSS0013707	2438.31	2664.24	2742.49	900.381	855.08	902.639	2615.01	886.034	1.56135	3.16599e-124	1.39219e-122	CSS0013707	Chr8	15962928	15971966	-	492	protein_coding	- && sp|A6MZM2|SUI1_ORYSI Protein translation factor SUI1 homolog OS=Oryza sativa subsp. indica OX=39946 GN=GOS2 PE=2 SV=1 && PF01253:Translation initiation factor SUI1	SUI1
CSS0028045	986.363	1048.13	1047.78	176.581	166.636	148.647	1027.42	163.955	2.64627	5.27523e-124	2.31723e-122	CSS0028045	Chr11	37403598	37412560	+	1163	protein_coding	- && sp|Q84JP1|NFYA7_ARATH Nuclear transcription factor Y subunit A-7 OS=Arabidopsis thaliana OX=3702 GN=NFYA7 PE=1 SV=1 && PF02045:CCAAT-binding transcription factor (CBF-B/NF-YA) subunit B	CBFB_NFYA
CSS0039913	2518.59	2455.52	2401.24	861.754	821.753	911.441	2458.45	864.983	1.5072	1.06383e-123	4.66807e-122	CSS0039913	Chr10	150688212	150701333	+	1518	protein_coding	- && sp|Q9ZNZ7|GLTB1_ARATH Ferredoxin-dependent glutamate synthase 1, chloroplastic/mitochondrial OS=Arabidopsis thaliana OX=3702 GN=GLU1 PE=1 SV=3 && PF00310:Glutamine amidotransferases class-II	GATase_2
CSS0003444	863.946	959.171	922.815	2519.96	2518.58	2543.62	915.31	2527.39	-1.4663	1.2416e-123	5.44236e-122	CSS0003444	Chr3	165641030	165657569	-	1769	protein_coding	- && - && PF05686:Glycosyl transferase family 90	-
CSS0020593	650.217	727.647	677.692	31.2696	39.9926	34.2279	685.185	35.1634	4.28491	1.61425e-123	7.0683e-122	CSS0020593	Chr13	96594772	96601842	-	1072	protein_coding	- && sp|I6YGS0|EPHA_MYCTU Epoxide hydrolase A OS=Mycobacterium tuberculosis (strain ATCC 25618 / H37Rv) OX=83332 GN=ephA PE=1 SV=1 && PF00561:alpha/beta hydrolase fold	Abhydrolase_1
CSS0032532	997.401	954.609	952.614	10.1166	5.71323	12.7132	968.208	9.51437	6.67212	2.02858e-123	8.87312e-122	CSS0032532	Contig106	1026	2130	+	553	protein_coding	- && - && -	-
CSS0026216	2010.86	2100.82	2137.85	648.385	643.69	702.162	2083.18	664.746	1.64832	2.56258e-123	1.1197e-121	CSS0026216	Chr3	76013124	76015783	-	1819	protein_coding	- && sp|Q940G6|GID1C_ARATH Gibberellin receptor GID1C OS=Arabidopsis thaliana OX=3702 GN=GID1C PE=1 SV=1 && PF07859:alpha/beta hydrolase fold	Abhydrolase_3
CSS0020368	21.0718	14.8267	8.65139	813.01	828.418	841.029	14.85	827.486	-5.80808	3.95231e-123	1.72328e-121	CSS0020368	Chr2	61321421	61326280	+	3806	protein_coding	- && sp|Q6YU51|DXS2_ORYSJ Probable 1-deoxy-D-xylulose-5-phosphate synthase 2, chloroplastic OS=Oryza sativa subsp. japonica OX=39947 GN=Os07g0190000 PE=2 SV=1 && -	-
CSS0013789	329.122	354.699	360.474	1466.91	1406.41	1422.9	348.099	1432.07	-2.04081	4.14522e-123	1.80549e-121	CSS0013789	Chr6	14419687	14421114	-	1117	protein_coding	- && sp|K4BWV2|NAP1_SOLLC NAC domain-containing protein 1 OS=Solanum lycopersicum OX=4081 GN=NAP1 PE=2 SV=1 && PF02365:No apical meristem (NAM) protein	NAM
CSS0023866	164.561	180.201	124.003	1110.07	1086.47	1145.17	156.255	1113.9	-2.84042	5.88272e-123	2.55957e-121	CSS0023866	Chr12	52490465	52497199	-	2059	protein_coding	- && sp|Q9SDZ9|PPAF2_IPOBA Purple acid phosphatase 2 OS=Ipomoea batatas OX=4120 GN=PAP2 PE=1 SV=1 && -	-
CSS0015307	1215.14	1112	1142.94	226.245	199.963	223.948	1156.7	216.719	2.41631	7.80662e-123	3.39308e-121	CSS0015307	Chr4	1544920	1546911	-	693	protein_coding	- && sp|Q1G3Q4|RITF1_ARATH Protein RGF1 INDUCIBLE TRANSCRIPTION FACTOR 1 OS=Arabidopsis thaliana OX=3702 GN=RITF1 PE=1 SV=1 && PF04640:PLATZ transcription factor	-
CSS0030935	412.406	406.022	416.228	1593.83	1516.86	1524.61	411.552	1545.1	-1.9082	1.05841e-122	4.59547e-121	CSS0030935	Chr2	42389449	42391181	+	982	protein_coding	- && - && PF00257:Dehydrin	-
CSS0029809	96.3285	107.208	110.546	930.731	838.892	870.367	104.694	879.997	-3.07165	1.10014e-122	4.77163e-121	CSS0029809	Contig641	117719	119461	-	1743	protein_coding	- && sp|Q8RXX9|ATL6_ARATH E3 ubiquitin-protein ligase ATL6 OS=Arabidopsis thaliana OX=3702 GN=ATL6 PE=1 SV=2 && PF13639:Ring finger domain	-
CSS0032946	9.03079	11.4051	10.5739	1047.53	1115.03	964.25	10.3366	1042.27	-6.66124	1.20284e-122	5.21159e-121	CSS0032946	Chr1	129160027	129163821	+	3795	protein_coding	- && sp|Q9LZL3|PCS1L_ARATH Aspartic proteinase PCS1 OS=Arabidopsis thaliana OX=3702 GN=PCS1 PE=2 SV=1 && PF14541:Xylanase inhibitor C-terminal|PF14543:Xylanase inhibitor N-terminal	-
CSS0031124	4443.15	4195.94	4392.02	2077.59	2056.76	2075.19	4343.7	2069.85	1.0698	1.3166e-122	5.6985e-121	CSS0031124	Chr13	96925668	96935620	+	2944	protein_coding	- && sp|P0DKG8|RSH1L_ARATH Putative GTP diphosphokinase RSH1, chloroplastic OS=Arabidopsis thaliana OX=3702 GN=RSH1 PE=1 SV=1 && PF13328:HD domain|PF02824:TGS domain|PF04607:Region found in RelA / SpoT proteins	-
CSS0005382	414.413	376.369	401.809	1699.6	1524.48	1579.37	397.53	1601.15	-2.00868	1.36344e-122	5.89505e-121	CSS0005382	Chr9	115530262	115533086	-	2825	protein_coding	- && sp|O65351|SBT17_ARATH Subtilisin-like protease SBT1.7 OS=Arabidopsis thaliana OX=3702 GN=SBT1.7 PE=1 SV=1 && PF02225:PA domain|PF05922:Peptidase inhibitor I9|PF00082:Subtilase family|PF17766:Fibronectin type-III domain	Peptidase_S8
CSS0034597	1106.77	1131.39	1525.53	128.757	136.165	99.75	1254.56	121.558	3.36683	2.6977e-122	1.16517e-120	CSS0034597	Contig872	303650	304608	+	615	protein_coding	- && - && -	-
CSS0020016	1753.98	1900.09	1921.57	4094.48	4313.49	4207.1	1858.55	4205.02	-1.17808	6.40331e-122	2.76279e-120	CSS0020016	Chr9	7283917	7289968	+	2112	protein_coding	- && sp|Q39659|MFPA_CUCSA Glyoxysomal fatty acid beta-oxidation multifunctional protein MFP-a OS=Cucumis sativus OX=3659 PE=1 SV=1 && PF00378:Enoyl-CoA hydratase/isomerase|PF00725:3-hydroxyacyl-CoA dehydrogenase, C-terminal domain|PF02737:3-hydroxyacyl-CoA dehydrogenase, NAD binding domain	3HCDH_N
CSS0010989	2867.78	2777.15	2821.31	1131.22	1094.08	1019.99	2822.08	1081.77	1.38306	1.16142e-121	5.00586e-120	CSS0010989	Chr7	144515102	144521467	+	1159	protein_coding	- && - && -	-
novel.6071	147.503	156.25	142.267	927.972	991.245	1002.39	148.673	973.869	-2.71362	2.46385e-121	1.06084e-119	-	Chr6	3129242	3132357	+	2598	-	- && - && -	-
CSS0028386	2938.02	2956.21	2878.99	1152.38	1118.84	1010.21	2924.4	1093.81	1.41807	2.65454e-121	1.14176e-119	CSS0028386	Chr2	84468101	84487561	-	3975	protein_coding	- && - && -	-
CSS0003010	19.065	9.1241	18.264	761.507	917.925	804.845	15.4844	828.093	-5.71624	3.4646e-121	1.48862e-119	CSS0003010	Chr11	118672696	118679689	+	926	protein_coding	- && sp|O64865|LTG14_ARATH Non-specific lipid transfer protein GPI-anchored 14 OS=Arabidopsis thaliana OX=3702 GN=LTPG14 PE=2 SV=1 && PF14368:Probable lipid transfer	-
CSS0047474	1339.57	1382.3	1403.45	320.974	350.411	320.765	1375.11	330.717	2.05593	4.11279e-121	1.76529e-119	CSS0047474	Chr1	177292332	177300088	-	3406	protein_coding	- && sp|O23225|PUB5_ARATH U-box domain-containing protein 5 OS=Arabidopsis thaliana OX=3702 GN=PUB5 PE=3 SV=3 && PF04564:U-box domain	U-box
CSS0005409	2914.94	2993.84	2971.27	1184.57	1218.82	1257.63	2960.02	1220.34	1.2785	4.69212e-121	2.01186e-119	CSS0005409	Chr2	115565797	115570757	-	1701	protein_coding	- && sp|Q944I4|GLYK_ARATH D-glycerate 3-kinase, chloroplastic OS=Arabidopsis thaliana OX=3702 GN=GLYK PE=1 SV=2 && -	-
CSS0016668	3529.03	3469.44	3375	1551.53	1546.38	1513.85	3457.82	1537.25	1.16927	7.15792e-121	3.06595e-119	CSS0016668	Chr6	1447734	1450928	-	2290	protein_coding	- && sp|Q9LYR6|PTR49_ARATH Protein NRT1/ PTR FAMILY 6.1 OS=Arabidopsis thaliana OX=3702 GN=NPF6.1 PE=2 SV=1 && PF00854:POT family	-
CSS0041512	3349.42	3586.91	3238.5	1393.34	1377.84	1342.71	3391.61	1371.3	1.30561	8.83974e-121	3.7824e-119	CSS0041512	Chr7	184309463	184315154	+	1137	protein_coding	- && sp|Q9FLT9|HP302_ARATH Chloroplastic import inner membrane translocase subunit HP30-2 OS=Arabidopsis thaliana OX=3702 GN=HP30-2 PE=1 SV=1 && PF02466:Tim17/Tim22/Tim23/Pmp24 family|PF00536:SAM domain (Sterile alpha motif)	SAM_1
CSS0026065	1137.88	1080.06	1141.98	205.092	201.867	229.816	1119.98	212.259	2.40077	1.12696e-120	4.81713e-119	CSS0026065	Chr10	127738725	127742099	+	1154	protein_coding	- && - && -	-
CSS0007059	256.876	239.508	267.232	1181.81	1290.24	1246.87	254.538	1239.64	-2.28163	1.68096e-120	7.1777e-119	CSS0007059	Chr8	159205345	159217111	+	1209	protein_coding	- && sp|Q9CW42|MARC1_MOUSE Mitochondrial amidoxime-reducing component 1 OS=Mus musculus OX=10090 GN=Mtarc1 PE=1 SV=2 && PF03473:MOSC domain|PF03476:MOSC N-terminal beta barrel domain	MOSC_N
CSS0024416	2403.19	2533.08	2537.74	784.5	904.595	843.963	2491.34	844.352	1.56127	2.32699e-120	9.92599e-119	CSS0024416	Chr5	7391413	7394493	+	1076	protein_coding	- && sp|Q52K82|CML21_ARATH Probable calcium-binding protein CML21 OS=Arabidopsis thaliana OX=3702 GN=CML21 PE=2 SV=1 && PF13499:EF-hand domain pair	-
CSS0028409	18.0616	17.1077	19.2253	736.676	703.679	779.419	18.1315	739.925	-5.34668	2.54753e-120	1.08555e-118	CSS0028409	Chr9	93566457	93567349	-	893	protein_coding	- && sp|Q9LTA2|AHL17_ARATH AT-hook motif nuclear-localized protein 17 OS=Arabidopsis thaliana OX=3702 GN=AHL17 PE=2 SV=1 && PF03479:Plants and Prokaryotes Conserved (PCC) domain	-
CSS0006461	4161.19	4290.61	4380.49	1989.3	1935.83	1800.39	4277.43	1908.51	1.16397	4.87566e-120	2.07548e-118	CSS0006461	Contig567	324356	329183	-	1752	protein_coding	- && sp|Q2R1V8|GME2_ORYSJ GDP-mannose 3,5-epimerase 2 OS=Oryza sativa subsp. japonica OX=39947 GN=GME-2 PE=2 SV=2 && PF01370:NAD dependent epimerase/dehydratase family	Epimerase
CSS0016019	122.417	87.8194	111.507	915.096	944.587	868.412	107.248	909.365	-3.07724	6.94291e-120	2.95242e-118	CSS0016019	Chr5	70671703	70677357	-	1731	protein_coding	- && sp|Q9C519|WRKY6_ARATH WRKY transcription factor 6 OS=Arabidopsis thaliana OX=3702 GN=WRKY6 PE=1 SV=1 && PF03106:WRKY DNA -binding domain	WRKY
CSS0032724	851.905	830.293	862.255	2355.34	2305.29	2283.49	848.151	2314.71	-1.44789	1.15911e-119	4.91891e-118	CSS0032724	Contig822	65016	82942	-	3622	protein_coding	- && sp|Q5XEZ5|CSC1_ARATH Calcium permeable stress-gated cation channel 1 OS=Arabidopsis thaliana OX=3702 GN=CSC1 PE=1 SV=1 && PF02714:Calcium-dependent channel, 7TM region, putative phosphate|PF14703:Cytosolic domain of 10TM putative phosphate transporter|PF13967:Late exocytosis, associated with Golgi transport	-
CSS0049364	22.0753	20.5292	17.3028	786.339	675.113	741.279	19.9691	734.244	-5.20437	1.17976e-119	5.00139e-118	CSS0049364	Chr2	33080431	33082445	+	2015	protein_coding	- && sp|Q8W3M4|Y4744_ARATH Uncharacterized protein At4g06744 OS=Arabidopsis thaliana OX=3702 GN=At4g06744 PE=2 SV=1 && -	-
CSS0034730	59.2019	83.2574	73.0562	774.383	765.573	824.404	71.8385	788.12	-3.46144	1.28813e-119	5.4552e-118	CSS0034730	Chr4	15657435	15658551	-	1086	protein_coding	- && sp|Q9LN68|GATL1_ARATH Probable galacturonosyltransferase-like 1 OS=Arabidopsis thaliana OX=3702 GN=GATL1 PE=2 SV=1 && PF01501:Glycosyl transferase family 8	Glyco_transf_8
CSS0038052	3551.11	3622.27	3891.2	1562.56	1532.1	1597.96	3688.19	1564.2	1.2379	1.37287e-119	5.80811e-118	CSS0038052	Chr9	113942603	113948734	+	1479	protein_coding	- && - && PF05004:Interferon-related developmental regulator (IFRD)|PF04836:Interferon-related protein conserved region	-
CSS0010090	34.1163	34.2154	50.9471	752.31	718.915	680.647	39.7596	717.291	-4.16293	2.71882e-119	1.14906e-117	CSS0010090	Chr12	121719938	121724244	-	2754	protein_coding	- && sp|O64793|Y1675_ARATH G-type lectin S-receptor-like serine/threonine-protein kinase At1g67520 OS=Arabidopsis thaliana OX=3702 GN=At1g67520 PE=2 SV=3 && PF07714:Protein tyrosine kinase|PF01453:D-mannose binding lectin|PF08276:PAN-like domain	Pkinase_Tyr
CSS0041495	1393.75	1329.84	1266.95	313.616	280.9	302.184	1330.18	298.9	2.15345	3.47193e-119	1.46584e-117	CSS0041495	Chr5	140425127	140431681	+	1026	protein_coding	- && sp|Q7XT99|AKR2_ORYSJ Probable aldo-keto reductase 2 OS=Oryza sativa subsp. japonica OX=39947 GN=Os04g0338000 PE=2 SV=2 && PF00248:Aldo/keto reductase family	Aldo_ket_red
CSS0024937	103.352	112.911	74.9787	1029.14	904.595	891.882	97.0806	941.872	-3.28669	3.68784e-119	1.55541e-117	CSS0024937	Chr4	44089139	44094338	-	1540	protein_coding	- && sp|Q9MA74|SDC1_ARATH Serine decarboxylase OS=Arabidopsis thaliana OX=3702 GN=SDC PE=1 SV=1 && PF00282:Pyridoxal-dependent decarboxylase conserved domain	-
CSS0036065	3211.95	3204.84	3156.79	1319.76	1209.3	1351.51	3191.2	1293.53	1.30278	6.22128e-119	2.62125e-117	CSS0036065	Chr2	93541890	93552141	-	1908	protein_coding	- && sp|Q9SZX3|ASSY_ARATH Argininosuccinate synthase, chloroplastic OS=Arabidopsis thaliana OX=3702 GN=At4g24830 PE=1 SV=3 && PF00764:Arginosuccinate synthase	-
CSS0004113	3155.76	3209.4	3118.34	1283.89	1387.36	1319.24	3161.17	1330.17	1.24879	6.75932e-119	2.84505e-117	CSS0004113	Chr14	11513554	11515463	-	1146	protein_coding	- && sp|Q84VQ4|NDHU_ARATH NAD(P)H-quinone oxidoreductase subunit U, chloroplastic OS=Arabidopsis thaliana OX=3702 GN=ndhU PE=1 SV=1 && -	-
CSS0047779	1878.4	2046.08	1948.48	582.167	633.216	609.257	1957.66	608.213	1.68627	7.56318e-119	3.18015e-117	CSS0047779	Chr7	182359866	182365642	+	1054	protein_coding	- && sp|Q94A65|STR14_ARATH Rhodanese-like domain-containing protein 14, chloroplastic OS=Arabidopsis thaliana OX=3702 GN=At4g27700 PE=2 SV=1 && PF00581:Rhodanese-like domain	Rhodanese
CSS0007085	149.51	166.515	154.764	955.563	960.775	980.875	156.929	965.737	-2.62366	1.61672e-118	6.79104e-117	CSS0007085	Chr12	159430738	159434699	+	2381	protein_coding	- && sp|Q6R3L0|YSL1_ARATH Metal-nicotianamine transporter YSL1 OS=Arabidopsis thaliana OX=3702 GN=YSL1 PE=2 SV=2 && PF03169:OPT oligopeptide transporter protein	OPT
CSS0010893	877.994	866.789	802.656	2319.47	2461.45	2448.76	849.146	2409.89	-1.50561	1.98588e-118	8.33324e-117	CSS0010893	Chr4	141835298	141839681	+	2651	protein_coding	- && sp|Q9XE58|SCL14_ARATH Scarecrow-like protein 14 OS=Arabidopsis thaliana OX=3702 GN=SCL14 PE=1 SV=2 && PF03514:GRAS domain family	GRAS
CSS0013752	746.546	750.457	773.819	2337.86	2151.98	2186.68	756.94	2225.51	-1.55568	2.2742e-118	9.53338e-117	CSS0013752	Chr2	76369108	76391634	+	5380	protein_coding	- && sp|Q9FLQ7|FH20_ARATH Formin-like protein 20 OS=Arabidopsis thaliana OX=3702 GN=FH20 PE=2 SV=3 && PF02181:Formin Homology 2 Domain|PF10409:C2 domain of PTEN tumour-suppressor protein	FH2
CSS0004569	2165.38	2145.3	2093.64	4461.44	4292.54	4550.36	2134.77	4434.78	-1.05495	2.46076e-118	1.0305e-116	CSS0004569	Chr4	17632873	17640123	+	1971	protein_coding	- && sp|Q8GZD4|NAT3_ARATH Nucleobase-ascorbate transporter 3 OS=Arabidopsis thaliana OX=3702 GN=NAT3 PE=2 SV=2 && PF00860:Permease family	-
CSS0030295	1446.93	1482.67	1432.29	272.23	354.22	285.559	1453.96	304.003	2.25801	5.53313e-118	2.31478e-116	CSS0030295	Chr5	4262979	4265576	-	1316	protein_coding	- && sp|Q9ZTA3|AOP1C_ARATH Probable 2-oxoglutarate-dependent dioxygenase AOP1 OS=Arabidopsis thaliana OX=3702 GN=AOP1 PE=2 SV=1 && PF03171:2OG-Fe(II) oxygenase superfamily|PF14226:non-haem dioxygenase in morphine synthesis N-terminal	2OG-FeII_Oxy
novel.2340	2535.65	2284.45	2580.04	796.456	835.084	851.787	2466.71	827.775	1.57636	1.38742e-117	5.79839e-116	-	Chr13	47778991	47804706	-	9571	-	- && - && -	-
CSS0037634	1313.48	1399.41	1343.85	3227.21	3162.27	3111.81	1352.25	3167.1	-1.22866	2.89241e-117	1.20759e-115	CSS0037634	Chr9	1492312	1498436	-	1894	protein_coding	- && sp|Q41328|PTI1_SOLLC Pto-interacting protein 1 OS=Solanum lycopersicum OX=4081 GN=PTI1 PE=1 SV=2 && PF07714:Protein tyrosine kinase	Pkinase_Tyr
CSS0003475	3043.38	2945.94	2829	1144.1	1196.92	1204.82	2939.44	1181.95	1.31447	5.27911e-117	2.20182e-115	CSS0003475	Chr9	68333474	68347611	-	4040	protein_coding	- && sp|Q8W234|SEUSS_ARATH Transcriptional corepressor SEUSS OS=Arabidopsis thaliana OX=3702 GN=SEU PE=1 SV=1 && PF01803:LIM-domain binding protein	-
CSS0033467	12.0411	10.2646	14.419	798.295	837.94	850.809	12.2415	829.015	-6.06918	5.67122e-117	2.36297e-115	CSS0033467	Chr3	172845872	172850514	+	2118	protein_coding	- && sp|A4IJ27|ROGF3_ARATH Rop guanine nucleotide exchange factor 3 OS=Arabidopsis thaliana OX=3702 GN=ROPGEF3 PE=2 SV=1 && PF03759:PRONE (Plant-specific Rop nucleotide exchanger)	DUF315
CSS0033435	262.896	377.509	284.535	1624.18	1692.07	1575.46	308.313	1630.57	-2.40856	6.48658e-117	2.69997e-115	CSS0033435	Chr14	17330055	17337286	+	2209	protein_coding	- && sp|Q8L7A0|TAUE3_ARATH Sulfite exporter TauE/SafE family protein 3 OS=Arabidopsis thaliana OX=3702 GN=At2g25737 PE=2 SV=1 && PF01925:Sulfite exporter TauE/SafE	-
CSS0010657	245.838	331.889	310.489	1436.56	1443.54	1448.33	296.072	1442.81	-2.2875	1.15312e-116	4.79493e-115	CSS0010657	Chr9	77419682	77426636	+	723	protein_coding	- && sp|Q5NTH3|SK2_ORYSJ Shikimate kinase 2, chloroplastic OS=Oryza sativa subsp. japonica OX=39947 GN=SK2 PE=1 SV=1 && PF01202:Shikimate kinase	SKI
CSS0006750	78.2669	83.2574	71.1336	839.682	731.293	784.309	77.5526	785.094	-3.34366	1.57498e-116	6.54249e-115	CSS0006750	Chr4	34969944	34983552	+	7330	protein_coding	- && sp|Q38970|ACC1_ARATH Acetyl-CoA carboxylase 1 OS=Arabidopsis thaliana OX=3702 GN=ACC1 PE=1 SV=1 && PF01039:Carboxyl transferase domain|PF00289:Biotin carboxylase, N-terminal domain|PF08326:Acetyl-CoA carboxylase, central region|PF00364:Biotin-requiring enzyme|PF02785:Biotin carboxylase C-terminal domain|PF02786:Carbamoyl-phosphate synthase L chain, ATP binding domain	Carboxyl_trans
CSS0002695	296.009	279.425	220.13	1368.51	1678.74	1600.89	265.188	1549.38	-2.54892	1.79588e-116	7.45264e-115	CSS0002695	Chr7	155083712	155084458	+	747	protein_coding	- && sp|Q9LW50|ERF2_NICSY Ethylene-responsive transcription factor 2 OS=Nicotiana sylvestris OX=4096 GN=ERF2 PE=2 SV=1 && PF00847:AP2 domain	AP2
CSS0042622	602.053	500.685	576.759	2017.81	1920.6	1907.96	559.832	1948.79	-1.79704	3.71249e-116	1.53908e-114	CSS0042622	Chr5	4259353	4262559	+	1822	protein_coding	- && sp|P93836|HPPD_ARATH 4-hydroxyphenylpyruvate dioxygenase OS=Arabidopsis thaliana OX=3702 GN=HPD PE=1 SV=2 && -	-
CSS0007340	33.1129	28.5128	49.9858	692.53	688.444	777.463	37.2038	719.479	-4.25787	4.03396e-116	1.67067e-114	CSS0007340	Chr1	20491809	20495885	+	1782	protein_coding	- && sp|Q9SV30|GATA8_ARATH GATA transcription factor 8 OS=Arabidopsis thaliana OX=3702 GN=GATA8 PE=1 SV=1 && PF00320:GATA zinc finger	GATA
CSS0030995	1375.69	1375.46	1469.77	3312.74	3271.78	3211.56	1406.97	3265.36	-1.21397	9.64002e-116	3.98844e-114	CSS0030995	Chr6	57420465	57426582	-	2660	protein_coding	- && sp|Q9ASQ5|CRCK3_ARATH Calmodulin-binding receptor-like cytoplasmic kinase 3 OS=Arabidopsis thaliana OX=3702 GN=CRCK3 PE=2 SV=1 && PF07714:Protein tyrosine kinase	Pkinase_Tyr
CSS0027402	191.653	173.358	148.035	1066.85	1270.24	1095.29	171.015	1144.13	-2.74367	1.37796e-115	5.69541e-114	CSS0027402	Contig739	147619	151407	-	1336	protein_coding	- && sp|O82357|PANB1_ARATH 3-methyl-2-oxobutanoate hydroxymethyltransferase 1, mitochondrial OS=Arabidopsis thaliana OX=3702 GN=KPHMT1 PE=1 SV=1 && PF02548:Ketopantoate hydroxymethyltransferase	-
CSS0039019	770.628	958.03	872.829	75.415	84.7462	101.706	867.162	87.289	3.31407	3.04311e-115	1.25528e-113	CSS0039019	Chr7	36914436	36915353	+	816	protein_coding	- && sp|Q03666|GSTX4_TOBAC Probable glutathione S-transferase OS=Nicotiana tabacum OX=4097 PE=2 SV=1 && PF02798:Glutathione S-transferase, N-terminal domain|PF13410:Glutathione S-transferase, C-terminal domain	GST_N
CSS0049991	310.057	272.582	358.552	1546.01	1494.01	1412.15	313.731	1484.05	-2.23771	4.01825e-115	1.65586e-113	CSS0049991	Contig211	417419	418973	-	1555	protein_coding	- && sp|Q93Z00|TCP14_ARATH Transcription factor TCP14 OS=Arabidopsis thaliana OX=3702 GN=TCP14 PE=1 SV=1 && PF03634:TCP family transcription factor	TCP
CSS0044810	1673.71	1709.63	1660.11	439.614	510.382	437.14	1681.15	462.379	1.86214	5.78877e-115	2.38309e-113	CSS0044810	Chr10	166143467	166146324	+	1816	protein_coding	- && sp|Q10M18|TRL12_ORYSJ Thioredoxin-like 1-2, chloroplastic OS=Oryza sativa subsp. japonica OX=39947 GN=Os03g0326500 PE=2 SV=1 && PF00085:Thioredoxin	-
CSS0034166	499.704	481.296	509.471	1650.85	1653.98	1644.9	496.823	1649.91	-1.73055	6.11066e-115	2.5131e-113	CSS0034166	Chr12	112174616	112192418	+	1999	protein_coding	- && sp|Q94AA4|PFKA3_ARATH ATP-dependent 6-phosphofructokinase 3 OS=Arabidopsis thaliana OX=3702 GN=PFK3 PE=1 SV=1 && PF00365:Phosphofructokinase	PFK
CSS0039173	295.006	382.072	356.629	1477.95	1539.72	1601.87	344.569	1539.84	-2.16214	7.88835e-115	3.24097e-113	CSS0039173	Contig514	618000	644482	-	6238	protein_coding	- && sp|Q9LXT9|CALS3_ARATH Callose synthase 3 OS=Arabidopsis thaliana OX=3702 GN=CALS3 PE=3 SV=3 && PF02364:1,3-beta-glucan synthase component|PF04652:Vta1 like|PF14288:1,3-beta-glucan synthase subunit FKS1, domain-1	DUF605
CSS0032765	742.532	648.951	726.717	54.262	46.658	63.5662	706.067	54.8287	3.68898	8.42606e-115	3.45845e-113	CSS0032765	Chr4	75024859	75035401	+	1825	protein_coding	- && sp|O64566|PIRL6_ARATH Plant intracellular Ras-group-related LRR protein 6 OS=Arabidopsis thaliana OX=3702 GN=PIRL6 PE=2 SV=1 && -	-
CSS0011846	96.3285	76.4143	71.1336	757.829	810.326	839.073	81.2921	802.409	-3.30232	9.29621e-115	3.81181e-113	CSS0011846	Chr4	182140025	182144357	+	1616	protein_coding	- && sp|Q5XF09|PT311_ARATH Probable sugar phosphate/phosphate translocator At3g11320 OS=Arabidopsis thaliana OX=3702 GN=At3g11320 PE=2 SV=1 && PF03151:Triose-phosphate Transporter family	-
novel.8596	838.86	796.077	875.713	90.1301	106.647	70.4117	836.883	89.0629	3.23104	1.37748e-114	5.6426e-113	-	Contig1183	1165108	1171217	-	4761	-	- && - && -	-
CSS0048547	1441.92	1518.02	1517.84	389.951	354.22	411.713	1492.59	385.295	1.95394	1.85248e-114	7.58084e-113	CSS0048547	Chr11	87018535	87021681	+	1976	protein_coding	- && - && -	-
CSS0030954	28.0958	39.9179	29.7992	659.421	637.977	660.11	32.6043	652.503	-4.33471	3.52384e-114	1.44062e-112	CSS0030954	Chr14	8709044	8710287	+	1244	protein_coding	- && sp|Q9SJA7|SOX_ARATH Probable sarcosine oxidase OS=Arabidopsis thaliana OX=3702 GN=At2g24580 PE=2 SV=1 && PF01266:FAD dependent oxidoreductase	DAO
CSS0001195	3184.86	3216.24	3158.72	1439.32	1431.16	1442.46	3186.61	1437.65	1.14817	3.81553e-114	1.55833e-112	CSS0001195	Chr9	162795311	162797916	-	2499	protein_coding	- && sp|Q9C8E6|PMI1_ARATH Protein PLASTID MOVEMENT IMPAIRED 1 OS=Arabidopsis thaliana OX=3702 GN=PMI1 PE=1 SV=1 && PF10358:N-terminal C2 in EEIG1 and EHBP1 proteins	-
CSS0018201	2457.38	2400.78	2418.54	870.951	822.705	725.632	2425.57	806.429	1.58799	3.98159e-114	1.62455e-112	CSS0018201	Chr5	167060466	167061672	-	1120	protein_coding	- && sp|P23444|H1_MAIZE Histone H1 OS=Zea mays OX=4577 PE=2 SV=2 && PF00538:linker histone H1 and H5 family	-
CSS0015801	1253.27	1273.95	1216.96	2934.75	2952.79	3115.72	1248.06	3001.08	-1.26625	5.70818e-114	2.32672e-112	CSS0015801	Chr10	34520648	34526527	-	2530	protein_coding	- && - && PF05641:Agenet domain|PF01426:BAH domain	Agenet
CSS0026099	218.746	172.217	231.665	1188.25	1166.45	1141.26	207.543	1165.32	-2.48336	6.13327e-114	2.49752e-112	CSS0026099	Contig1095	404542	406931	+	728	protein_coding	- && - && PF00903:Glyoxalase/Bleomycin resistance protein/Dioxygenase superfamily	Glyoxalase
CSS0003467	371.266	460.767	374.893	3556.46	4586.77	4429.09	402.309	4190.78	-3.38237	1.04229e-113	4.24012e-112	CSS0003467	Chr11	34862908	34866421	-	2074	protein_coding	- && sp|O24370|LOX21_SOLTU Linoleate 13S-lipoxygenase 2-1, chloroplastic OS=Solanum tuberosum OX=4113 GN=LOX2.1 PE=1 SV=1 && PF00305:Lipoxygenase	Lipoxygenase
CSS0032174	803.741	802.92	782.47	100.247	75.2242	99.75	796.377	91.7403	3.11745	1.41613e-113	5.75525e-112	CSS0032174	Chr3	161721124	161723664	+	893	protein_coding	- && sp|K4BW79|ENOX_SOLLC 2-methylene-furan-3-one reductase OS=Solanum lycopersicum OX=4081 GN=EO PE=1 SV=1 && PF13602:Zinc-binding dehydrogenase	-
CSS0020332	382.304	358.121	363.358	1498.18	1395.93	1396.5	367.928	1430.21	-1.95829	1.43286e-113	5.81754e-112	CSS0020332	Chr14	50997200	51004682	-	1979	protein_coding	- && sp|P54873|HMCS_ARATH Hydroxymethylglutaryl-CoA synthase OS=Arabidopsis thaliana OX=3702 GN=HMGS PE=1 SV=2 && -	-
CSS0002481	931.175	976.278	996.832	162.786	179.015	167.228	968.095	169.676	2.51262	1.57957e-113	6.40689e-112	CSS0002481	Chr5	157065354	157070442	-	765	protein_coding	- && - && -	-
CSS0030458	841.871	817.747	829.572	2207.27	2227.21	2316.74	829.73	2250.41	-1.43902	1.66498e-113	6.74669e-112	CSS0030458	Chr2	154904053	154947888	+	3764	protein_coding	- && sp|Q9SKK2|RLP21_ARATH Receptor like protein 21 OS=Arabidopsis thaliana OX=3702 GN=RLP21 PE=3 SV=2 && PF13855:Leucine rich repeat|PF08263:Leucine rich repeat N-terminal domain	LRRNT_2
CSS0017465	206.705	203.011	233.587	1066.85	1162.64	1121.7	214.434	1117.06	-2.37851	1.69745e-113	6.8715e-112	CSS0017465	Chr13	105476635	105487715	+	1341	protein_coding	- && sp|Q8RWL5|CLT3_ARATH Protein CLT3, chloroplastic OS=Arabidopsis thaliana OX=3702 GN=CLT3 PE=2 SV=1 && PF08627:CRT-like, chloroquine-resistance transporter-like	-
CSS0043346	36.1232	14.8267	24.0316	683.333	661.782	697.272	24.9938	680.796	-4.7489	1.87895e-113	7.59882e-112	CSS0043346	Chr9	71641003	71645036	-	3132	protein_coding	- && sp|Q9LHP4|RGI1_ARATH LRR receptor-like serine/threonine-protein kinase RGI1 OS=Arabidopsis thaliana OX=3702 GN=RGI1 PE=1 SV=1 && PF00069:Protein kinase domain|PF13855:Leucine rich repeat	Pkinase
CSS0040605	1549.28	1589.87	1459.2	432.257	402.783	383.353	1532.79	406.131	1.91493	2.17618e-113	8.78363e-112	CSS0040605	Chr11	55071117	55081589	+	1575	protein_coding	- && - && PF05212:Protein of unknown function (DUF707)	-
CSS0041666	2075.08	2031.25	2082.1	753.23	734.15	737.367	2062.81	741.583	1.47602	2.27853e-113	9.18778e-112	CSS0041666	Chr3	133214203	133223773	+	953	protein_coding	- && sp|Q9SL03|CALS2_ARATH Callose synthase 2 OS=Arabidopsis thaliana OX=3702 GN=CALS2 PE=2 SV=3 && PF04652:Vta1 like	DUF605
CSS0043994	21.0718	19.3887	18.264	648.385	681.779	665	19.5749	665.054	-5.08707	2.39982e-113	9.6674e-112	CSS0043994	Chr1	9282292	9287677	-	2745	protein_coding	- && sp|Q6JN47|EIX1_SOLLC Receptor-like protein EIX1 OS=Solanum lycopersicum OX=4081 GN=EIX1 PE=2 SV=2 && PF13855:Leucine rich repeat|PF08263:Leucine rich repeat N-terminal domain	LRRNT_2
CSS0019113	1180.02	1179.29	1123.72	238.201	262.809	258.176	1161.01	253.062	2.19811	2.8935e-113	1.16335e-111	CSS0019113	Chr3	106926346	106928355	-	2010	protein_coding	- && sp|Q8GTS1|BZP24_ARATH Basic leucine zipper 24 OS=Arabidopsis thaliana OX=3702 GN=BZIP24 PE=1 SV=1 && PF07716:Basic region leucine zipper	bZIP_2
CSS0011928	2307.87	2268.48	2172.46	794.616	760.812	685.537	2249.6	746.988	1.58966	3.23627e-113	1.29989e-111	CSS0011928	Chr4	155263239	155267338	-	1069	protein_coding	- && sp|Q9LSS4|TET4_ARATH Tetraspanin-4 OS=Arabidopsis thaliana OX=3702 GN=TET4 PE=3 SV=1 && PF00335:Tetraspanin family	Tetraspannin
CSS0011386	135.462	139.142	118.236	921.534	864.602	886.014	130.947	890.717	-2.76932	7.62848e-113	3.0611e-111	CSS0011386	Chr4	26592547	26610271	+	1513	protein_coding	- && sp|Q9FGF0|PGML1_ARATH Phosphoglycerate mutase-like protein 1 OS=Arabidopsis thaliana OX=3702 GN=At5g64460 PE=2 SV=1 && PF00300:Histidine phosphatase superfamily (branch 1)	-
CSS0005060	19.065	30.7938	25.9542	657.582	633.216	652.287	25.271	647.695	-4.68996	9.40579e-113	3.77063e-111	CSS0005060	Chr3	182089981	182092724	-	1452	protein_coding	- && sp|F1B281|EBIII_PETHY MYB-like transcription factor 4 OS=Petunia hybrida OX=4102 GN=MYB4 PE=2 SV=1 && PF00249:Myb-like DNA-binding domain	Myb_DNA-binding
CSS0041171	773.638	685.448	714.22	60.6999	61.8933	78.2353	724.435	66.9428	3.43856	1.97846e-112	7.92364e-111	CSS0041171	Contig705	503766	505124	-	623	protein_coding	- && sp|Q40410|MT2_NICPL Metallothionein-like protein type 2 OS=Nicotiana plumbaginifolia OX=4092 PE=3 SV=1 && -	-
CSS0039034	310.057	347.856	291.263	1328.96	1555.9	1492.34	316.392	1459.07	-2.20815	2.34554e-112	9.38465e-111	CSS0039034	Chr12	152082454	152083256	+	803	protein_coding	- && sp|Q9SUQ8|DIR6_ARATH Dirigent protein 6 OS=Arabidopsis thaliana OX=3702 GN=DIR6 PE=1 SV=1 && PF03018:Dirigent-like protein	-
CSS0047533	40.1369	44.48	44.2182	633.67	691.301	639.573	42.945	654.848	-3.93168	4.5551e-112	1.82076e-110	CSS0047533	Chr9	79858852	79869225	-	2354	protein_coding	- && sp|Q9FY79|LAC14_ARATH Laccase-14 OS=Arabidopsis thaliana OX=3702 GN=LAC14 PE=2 SV=1 && PF07731:Multicopper oxidase|PF00394:Multicopper oxidase|PF07732:Multicopper oxidase	-
CSS0044828	2.00684	6.84307	12.4964	1193.76	1174.07	1228.29	7.11545	1198.71	-7.37851	6.85955e-112	2.73659e-110	CSS0044828	Chr6	14857196	14859251	-	2056	protein_coding	- && - && -	-
CSS0022676	14.0479	36.4964	20.1866	699.888	658.926	685.537	23.577	681.45	-4.88234	1.79009e-111	7.12774e-110	CSS0022676	Chr14	30612609	30620265	-	2562	protein_coding	- && sp|Q336N8|JM706_ORYSJ Lysine-specific demethylase JMJ706 OS=Oryza sativa subsp. japonica OX=39947 GN=JMJ706 PE=2 SV=1 && PF02373:JmjC domain, hydroxylase|PF02928:C5HC2 zinc finger|PF02375:jmjN domain	JmjC
CSS0040159	1847.3	1821.4	1789.88	4110.12	4088.77	3783.65	1819.52	3994.18	-1.13461	3.48692e-111	1.38574e-109	CSS0040159	Chr11	86738933	86743854	+	1107	protein_coding	- && sp|A2XAZ3|ADHX_ORYSI Alcohol dehydrogenase class-3 OS=Oryza sativa subsp. indica OX=39946 GN=ADHIII PE=3 SV=1 && PF08240:Alcohol dehydrogenase GroES-like domain|PF00107:Zinc-binding dehydrogenase	ADH_zinc_N
CSS0000172	14.0479	6.84307	10.5739	933.49	902.69	780.397	10.4883	872.192	-6.35906	4.85733e-111	1.9285e-109	CSS0000172	Chr11	71939860	71946723	+	2463	protein_coding	- && sp|O22397|POT1_ARATH Potassium transporter 1 OS=Arabidopsis thaliana OX=3702 GN=POT1 PE=1 SV=2 && PF02705:K+ potassium transporter	K_trans
CSS0034731	4342.81	4021.45	4095.95	1946.99	1970.11	1996.96	4153.4	1971.35	1.07548	1.16366e-110	4.61562e-109	CSS0034731	Contig1050	969520	974774	+	2022	protein_coding	- && sp|Q5N800|NYC1_ORYSJ Probable chlorophyll(ide) b reductase NYC1, chloroplastic OS=Oryza sativa subsp. japonica OX=39947 GN=NYC1 PE=1 SV=1 && PF00106:short chain dehydrogenase	adh_short
CSS0043291	48.1642	52.4636	52.8696	787.259	672.257	653.265	51.1658	704.26	-3.78377	1.65236e-110	6.54775e-109	CSS0043291	Chr8	150066866	150068710	+	1845	protein_coding	- && sp|Q9SA85|BBE8_ARATH Berberine bridge enzyme-like 8 OS=Arabidopsis thaliana OX=3702 GN=At1g30700 PE=2 SV=1 && PF01565:FAD binding domain|PF08031:Berberine and berberine like	FAD_binding_4
CSS0041717	574.96	567.975	636.358	1942.4	2321.48	2095.73	593.098	2119.87	-1.8362	1.68602e-110	6.67473e-109	CSS0041717	Chr3	51236738	51238765	+	539	protein_coding	- && sp|Q8H5T6|LTI6A_ORYSJ Hydrophobic protein LTI6A OS=Oryza sativa subsp. japonica OX=39947 GN=LTI6A PE=2 SV=1 && -	-
CSS0002534	9.03079	3.42154	1.92253	2257.85	1934.88	2193.52	4.79162	2128.75	-8.79137	2.33675e-110	9.24202e-109	CSS0002534	Chr9	93985568	93987252	+	1685	protein_coding	- && sp|O04496|AED3_ARATH Aspartyl protease AED3 OS=Arabidopsis thaliana OX=3702 GN=AED3 PE=1 SV=1 && PF14541:Xylanase inhibitor C-terminal|PF14543:Xylanase inhibitor N-terminal	-
CSS0046399	2960.09	2925.41	2859.76	1256.3	1227.39	1288.93	2915.09	1257.54	1.21293	3.85761e-110	1.52426e-108	CSS0046399	Chr10	88141745	88145921	+	1052	protein_coding	- && sp|Q42577|NDUS7_ARATH NADH dehydrogenase [ubiquinone] iron-sulfur protein 7, mitochondrial OS=Arabidopsis thaliana OX=3702 GN=At5g11770 PE=1 SV=1 && PF01058:NADH ubiquinone oxidoreductase, 20 Kd subunit	-
CSS0034817	143.489	153.969	163.415	982.234	922.686	903.617	153.624	936.179	-2.60694	4.8512e-110	1.91502e-108	CSS0034817	Chr2	58007532	58009799	+	945	protein_coding	- && sp|Q9ZU95|NUD17_ARATH Nudix hydrolase 17, mitochondrial OS=Arabidopsis thaliana OX=3702 GN=NUDT17 PE=2 SV=1 && PF00293:NUDIX domain	NUDIX
CSS0025515	30.1026	31.9343	24.9929	684.253	617.029	607.301	29.01	636.194	-4.46209	6.24307e-110	2.46211e-108	CSS0025515	Chr15	38811378	38814014	+	1889	protein_coding	- && sp|Q8S9J6|ASPA_ARATH Aspartyl protease family protein At5g10770 OS=Arabidopsis thaliana OX=3702 GN=At5g10770 PE=2 SV=1 && PF14541:Xylanase inhibitor C-terminal|PF14543:Xylanase inhibitor N-terminal	-
CSS0028404	61.2087	65.0092	73.0562	722.88	712.249	672.823	66.4247	702.651	-3.40096	6.2918e-110	2.47896e-108	CSS0028404	Contig766	379843	382022	+	2180	protein_coding	- && sp|P93050|RKF3_ARATH Probable LRR receptor-like serine/threonine-protein kinase RKF3 OS=Arabidopsis thaliana OX=3702 GN=RKF3 PE=2 SV=1 && PF00069:Protein kinase domain	Pkinase
CSS0038800	4497.33	4478.79	4482.38	2073.91	2278.63	2205.26	4486.17	2185.93	1.0375	7.18324e-110	2.82748e-108	CSS0038800	Chr15	10800896	10811440	+	2232	protein_coding	- && sp|Q9FNA9|PDAT1_ARATH Phospholipid:diacylglycerol acyltransferase 1 OS=Arabidopsis thaliana OX=3702 GN=PDAT1 PE=2 SV=1 && PF02450:Lecithin:cholesterol acyltransferase	-
CSS0039333	1010.45	966.014	959.343	2.75908	8.56984	10.7574	978.601	7.36209	7.07017	9.37814e-110	3.68793e-108	CSS0039333	Chr6	34687140	34689422	-	1908	protein_coding	- && sp|P93604|LRK10_WHEAT Rust resistance kinase Lr10 OS=Triticum aestivum OX=4565 GN=LRK10 PE=2 SV=1 && PF00069:Protein kinase domain|PF13947:Wall-associated receptor kinase galacturonan-binding	Pkinase
CSS0041447	805.747	797.218	742.097	100.247	107.599	89.9706	781.687	99.2722	2.97602	1.14155e-109	4.48486e-108	CSS0041447	Chr5	171926799	171931340	-	1620	protein_coding	- && sp|O22768|UNE12_ARATH Transcription factor UNE12 OS=Arabidopsis thaliana OX=3702 GN=UNE12 PE=1 SV=2 && PF00010:Helix-loop-helix DNA-binding domain	HLH
CSS0009973	3458.79	3637.09	3537.46	1566.24	1468.3	1626.32	3544.45	1553.62	1.1898	1.22024e-109	4.78943e-108	CSS0009973	Chr6	85960431	85972539	-	3953	protein_coding	- && - && -	-
CSS0037897	925.155	1013.92	923.776	168.304	164.731	142.779	954.282	158.605	2.58717	1.42714e-109	5.5962e-108	CSS0037897	Chr15	85861457	85863836	+	1535	protein_coding	- && sp|Q2V9B0|MY1R1_SOLTU Transcription factor MYB1R1 OS=Solanum tuberosum OX=4113 PE=2 SV=1 && PF00249:Myb-like DNA-binding domain	Myb_DNA-binding
CSS0010212	574.96	539.462	569.069	1872.5	2305.29	2315.76	561.164	2164.52	-1.94647	1.96746e-109	7.70762e-108	CSS0010212	Chr8	120423651	120424285	-	461	protein_coding	- && sp|P0CG85|UBI1P_NICSY Polyubiquitin OS=Nicotiana sylvestris OX=4096 GN=UBI11 PE=2 SV=1 && -	-
CSS0024933	1178.02	1115.42	1144.87	258.434	227.577	206.346	1146.1	230.786	2.31088	2.30811e-109	9.03358e-108	CSS0024933	Chr5	163228421	163231372	-	1669	protein_coding	- && sp|Q84MB3|ACCH1_ARATH 1-aminocyclopropane-1-carboxylate oxidase homolog 1 OS=Arabidopsis thaliana OX=3702 GN=At1g06620 PE=2 SV=1 && PF03171:2OG-Fe(II) oxygenase superfamily|PF14226:non-haem dioxygenase in morphine synthesis N-terminal	2OG-FeII_Oxy
CSS0030439	2330.95	1885.27	2513.71	477.322	546.566	508.529	2243.31	510.806	2.136	3.65201e-109	1.42799e-107	CSS0030439	Chr10	123966627	123967549	-	315	protein_coding	- && sp|O80934|Y2766_ARATH Uncharacterized protein At2g37660, chloroplastic OS=Arabidopsis thaliana OX=3702 GN=At2g37660 PE=1 SV=2 && PF13460:NAD(P)H-binding	-
CSS0000136	380.297	434.535	366.242	1518.42	1486.39	1470.82	393.691	1491.88	-1.92528	5.3763e-109	2.10021e-107	CSS0000136	Chr3	25013418	25017127	+	2013	protein_coding	- && sp|Q9ZRR5|TBA3_HORVU Tubulin alpha-3 chain OS=Hordeum vulgare OX=4513 GN=TUBA3 PE=2 SV=1 && PF00091:Tubulin/FtsZ family, GTPase domain|PF03953:Tubulin C-terminal domain	Tubulin
CSS0007758	3260.12	3097.63	3356.74	1349.19	1334.99	1433.66	3238.16	1372.62	1.23903	8.50403e-109	3.3189e-107	CSS0007758	Chr7	179065944	179078606	-	6877	protein_coding	- && sp|Q9LV03|GLUT1_ARATH Glutamate synthase 1 [NADH], chloroplastic OS=Arabidopsis thaliana OX=3702 GN=GLT1 PE=1 SV=2 && PF07992:Pyridine nucleotide-disulphide oxidoreductase|PF14691:Dihydroprymidine dehydrogenase domain II, 4Fe-4S cluster|PF00310:Glutamine amidotransferases class-II|PF01493:GXGXG motif|PF04898:Glutamate synthase central domain|PF01645:Conserved region in glutamate synthase	GATase_2
CSS0022914	140.479	142.564	147.074	909.578	886.503	854.72	143.372	883.6	-2.62329	1.03464e-108	4.03031e-107	CSS0022914	Chr12	146278091	146281407	-	1423	protein_coding	- && sp|Q42605|UGE1_ARATH Bifunctional UDP-glucose 4-epimerase and UDP-xylose 4-epimerase 1 OS=Arabidopsis thaliana OX=3702 GN=UGE1 PE=1 SV=2 && PF16363:GDP-mannose 4,6 dehydratase	-
CSS0036453	3209.95	3215.1	3207.74	1474.27	1338.8	1399.43	3210.93	1404.17	1.193	1.45881e-108	5.67725e-107	CSS0036453	Contig137	683120	687467	-	772	protein_coding	- && - && -	-
CSS0006423	1892.45	1914.92	1849.47	3812.14	4044.97	3943.06	1885.62	3933.39	-1.06106	1.49819e-108	5.82503e-107	CSS0006423	Chr2	17539263	17548911	-	4218	protein_coding	- && sp|A0A166B1A6|NMCP1_DAUCS Nuclear matrix constituent protein 1 OS=Daucus carota subsp. sativus OX=79200 GN=NMCP1 PE=1 SV=2 && -	-
novel.1842	602.053	591.926	638.28	17.4742	13.3309	22.4926	610.753	17.7659	5.10684	1.76025e-108	6.8375e-107	-	Chr12	32244453	32248838	-	1063	-	- && sp|Q9LQU4|PCR2_ARATH Protein PLANT CADMIUM RESISTANCE 2 OS=Arabidopsis thaliana OX=3702 GN=PCR2 PE=1 SV=1 && -	-
CSS0047494	347.184	354.699	311.45	1327.12	1315.95	1376.94	337.778	1340	-1.99006	4.23508e-108	1.64352e-106	CSS0047494	Chr2	156468710	156584641	+	2884	protein_coding	- && sp|F4JSE7|EDR2_ARATH Protein ENHANCED DISEASE RESISTANCE 2 OS=Arabidopsis thaliana OX=3702 GN=EDR2 PE=2 SV=1 && PF07059:Protein of unknown function (DUF1336)|PF01852:START domain	START
CSS0029741	3262.12	3576.65	3500.93	1526.69	1514.01	1465.93	3446.57	1502.21	1.19759	4.34161e-108	1.68328e-106	CSS0029741	Chr3	13862185	13862862	+	678	protein_coding	- && - && -	-
CSS0010805	119.407	128.878	176.873	1054.89	1006.48	990.654	141.719	1017.34	-2.83868	1.39591e-107	5.40698e-106	CSS0010805	Contig567	254458	256660	+	2024	protein_coding	- && - && PF04720:PDDEXK-like family of unknown function	-
CSS0040647	13.0445	18.2482	20.1866	675.056	631.312	637.617	17.1597	647.995	-5.23903	1.65872e-107	6.41896e-106	CSS0040647	Chr9	99082880	99086549	+	3125	protein_coding	- && sp|F4I2N7|RLK7_ARATH Receptor-like protein kinase 7 OS=Arabidopsis thaliana OX=3702 GN=RLK7 PE=1 SV=1 && PF08263:Leucine rich repeat N-terminal domain|PF00069:Protein kinase domain	Pkinase
CSS0047580	2139.29	2124.77	2027.31	758.748	766.525	783.331	2097.13	769.535	1.44625	1.67608e-107	6.48007e-106	CSS0047580	Chr9	91044228	91045225	+	998	protein_coding	- && sp|Q6YXH5|ZHD1_ORYSJ Zinc-finger homeodomain protein 1 OS=Oryza sativa subsp. japonica OX=39947 GN=ZHD1 PE=2 SV=1 && PF04770:ZF-HD protein dimerisation region	ZF-HD_dimer
CSS0025202	248.849	261.177	216.285	1116.51	1204.54	1152.99	242.103	1158.01	-2.26111	4.13544e-107	1.59735e-105	CSS0025202	Contig1054	687238	691602	+	2228	protein_coding	- && sp|Q9LFP7|PBL34_ARATH Serine/threonine-protein kinase PBL34 OS=Arabidopsis thaliana OX=3702 GN=PBL34 PE=1 SV=1 && PF07714:Protein tyrosine kinase	Pkinase_Tyr
CSS0042199	1261.3	1419.94	1265.99	317.295	291.375	263.066	1315.74	290.579	2.17702	4.99222e-107	1.92648e-105	CSS0042199	Chr3	108184447	108218278	+	1824	protein_coding	- && sp|Q0WRX3|SCP40_ARATH Serine carboxypeptidase-like 40 OS=Arabidopsis thaliana OX=3702 GN=SCPL40 PE=2 SV=2 && PF00450:Serine carboxypeptidase	Peptidase_S10
CSS0008868	3290.22	3264.15	3378.85	1513.82	1549.24	1560.79	3311.07	1541.28	1.10355	7.30252e-107	2.81539e-105	CSS0008868	Chr2	18219645	18226799	+	1169	protein_coding	- && sp|Q55403|Y575_SYNY3 Thylakoid membrane protein slr0575 OS=Synechocystis sp. (strain PCC 6803 / Kazusa) OX=1111708 GN=slr0575 PE=4 SV=1 && PF11016:Protein of unknown function (DUF2854)	-
CSS0026915	1088.71	1009.35	1108.34	209.69	178.062	152.559	1068.8	180.104	2.56756	8.08858e-107	3.11554e-105	CSS0026915	Contig30	369753	373051	-	1587	protein_coding	- && sp|O22822|U74F2_ARATH UDP-glycosyltransferase 74F2 OS=Arabidopsis thaliana OX=3702 GN=UGT74F2 PE=1 SV=1 && PF00201:UDP-glucoronosyl and UDP-glucosyl transferase	UDPGT
novel.8177	714.436	669.481	702.685	5.51817	13.3309	14.6691	695.534	11.1727	5.97168	1.07847e-106	4.15014e-105	-	Chr9	75145521	75153136	-	3919	-	- && sp|Q8VZG8|MIK2_ARATH MDIS1-interacting receptor like kinase 2 OS=Arabidopsis thaliana OX=3702 GN=MIK2 PE=1 SV=3 && PF13855:Leucine rich repeat|PF00069:Protein kinase domain	Pkinase
CSS0034481	2200.5	2036.95	2038.84	4236.12	4410.61	4325.43	2092.1	4324.05	-1.04707	1.10428e-106	4.24552e-105	CSS0034481	Chr12	16639271	16642755	-	1667	protein_coding	- && sp|Q8LDS2|XTH27_ARATH Probable xyloglucan endotransglucosylase/hydrolase protein 27 OS=Arabidopsis thaliana OX=3702 GN=XTH27 PE=2 SV=2 && PF06955:Xyloglucan endo-transglycosylase (XET) C-terminus|PF00722:Glycosyl hydrolases family 16	-
CSS0025240	528.803	515.511	562.34	1703.28	1690.16	1665.43	535.552	1686.29	-1.65347	1.93228e-106	7.42193e-105	CSS0025240	Chr13	64111718	64115576	-	1876	protein_coding	- && sp|O49169|EF1A_MANES Elongation factor 1-alpha OS=Manihot esculenta OX=3983 GN=EF1 PE=3 SV=1 && PF03143:Elongation factor Tu C-terminal domain|PF03144:Elongation factor Tu domain 2|PF00009:Elongation factor Tu GTP binding domain	GTP_EFTU
CSS0032954	302.03	236.086	258.58	1381.38	1250.24	1235.14	265.565	1288.92	-2.27661	3.42639e-106	1.31486e-104	CSS0032954	Chr6	60015507	60018848	+	1503	protein_coding	- && - && -	-
CSS0010497	13.0445	7.98358	18.264	732.077	682.731	676.735	13.0974	697.181	-5.70638	4.71785e-106	1.80877e-104	CSS0010497	Chr2	14693943	14704832	-	1856	protein_coding	- && sp|Q8L9Y0|SCP25_ARATH Serine carboxypeptidase-like 25 OS=Arabidopsis thaliana OX=3702 GN=SCPL25 PE=2 SV=2 && PF00450:Serine carboxypeptidase	Peptidase_S10
CSS0047164	51.1745	71.8523	64.4048	650.224	735.102	745.191	62.4772	710.172	-3.51191	4.76432e-106	1.82489e-104	CSS0047164	Chr3	107267171	107269158	-	1988	protein_coding	- && sp|Q9SV05|CCR35_ARATH Serine/threonine-protein kinase-like protein At3g51990 OS=Arabidopsis thaliana OX=3702 GN=At3g51990 PE=2 SV=1 && PF00069:Protein kinase domain	Pkinase
CSS0001125	12.0411	4.56205	11.5352	849.798	848.414	791.154	9.37943	829.789	-6.43456	7.67347e-106	2.93375e-104	CSS0001125	Chr8	17079514	17082869	+	1942	protein_coding	- && sp|Q1JPL7|PME18_ARATH Pectinesterase/pectinesterase inhibitor 18 OS=Arabidopsis thaliana OX=3702 GN=PME18 PE=1 SV=3 && PF01095:Pectinesterase|PF04043:Plant invertase/pectin methylesterase inhibitor	-
CSS0017605	408.393	368.385	358.552	1424.61	1375.94	1436.6	378.443	1412.38	-1.89973	1.13396e-105	4.3314e-104	CSS0017605	Chr5	104743038	104748414	+	4910	protein_coding	- && sp|Q9ZT82|CALSC_ARATH Callose synthase 12 OS=Arabidopsis thaliana OX=3702 GN=CALS12 PE=2 SV=1 && PF02364:1,3-beta-glucan synthase component|PF14288:1,3-beta-glucan synthase subunit FKS1, domain-1	-
CSS0006627	1452.95	1344.66	1309.24	317.295	269.474	340.323	1368.95	309.031	2.14761	1.16706e-105	4.45371e-104	CSS0006627	Chr7	81429308	81433380	+	2181	protein_coding	- && - && PF10358:N-terminal C2 in EEIG1 and EHBP1 proteins	-
CSS0029738	166.568	145.986	192.253	1002.47	1258.81	1095.29	168.269	1118.86	-2.72817	1.86988e-105	7.12921e-104	CSS0029738	Chr8	89195459	89320665	+	5398	protein_coding	- && sp|F4IIU4|AIR9_ARATH 187-kDa microtubule-associated protein AIR9 OS=Arabidopsis thaliana OX=3702 GN=AIR9 PE=1 SV=1 && PF12799:Leucine Rich repeats (2 copies)	-
CSS0046597	295.006	258.896	328.753	1358.39	1253.1	1365.21	294.218	1325.57	-2.16762	2.23855e-105	8.52692e-104	CSS0046597	Chr11	64256929	64265964	+	2954	protein_coding	- && sp|Q8GUH1|PUB33_ARATH U-box domain-containing protein 33 OS=Arabidopsis thaliana OX=3702 GN=PUB33 PE=2 SV=2 && PF00069:Protein kinase domain|PF04564:U-box domain	Pkinase
CSS0029177	17.0582	6.84307	9.61265	746.792	736.054	732.478	11.1713	738.441	-6.02844	3.26034e-105	1.24076e-103	CSS0029177	Chr1	166104672	166107693	-	1073	protein_coding	- && sp|Q01IX6|DAO_ORYSI 2-oxoglutarate-dependent dioxygenase DAO OS=Oryza sativa subsp. indica OX=39946 GN=DAO PE=3 SV=1 && PF14226:non-haem dioxygenase in morphine synthesis N-terminal|PF03171:2OG-Fe(II) oxygenase superfamily	2OG-FeII_Oxy
CSS0012388	1964.7	1831.66	1838.9	649.305	647.499	624.904	1878.42	640.569	1.5521	4.14904e-105	1.57751e-103	CSS0012388	Chr7	61299288	61305275	+	1699	protein_coding	- && sp|O82279|CG160_ARATH Protein CONSERVED ONLY IN THE GREEN LINEAGE 160, chloroplastic OS=Arabidopsis thaliana OX=3702 GN=CGL160 PE=1 SV=1 && -	-
CSS0025541	1738.93	1434.76	1759.12	341.207	269.474	358.904	1644.27	323.195	2.34795	5.0756e-105	1.92803e-103	CSS0025541	Chr3	33504908	33509279	-	1689	protein_coding	- && sp|Q0WUA3|MENA_ARATH 2-carboxy-1,4-naphthoquinone phytyltransferase, chloroplastic OS=Arabidopsis thaliana OX=3702 GN=ABC4 PE=1 SV=2 && PF01040:UbiA prenyltransferase family	UbiA
CSS0029151	1112.79	989.964	975.684	181.18	174.253	204.39	1026.15	186.608	2.46011	5.67942e-105	2.15541e-103	CSS0029151	Contig672	80659	82566	+	1422	protein_coding	- && sp|Q5HZ36|GAT21_ARATH GATA transcription factor 21 OS=Arabidopsis thaliana OX=3702 GN=GATA21 PE=1 SV=2 && PF00320:GATA zinc finger	GATA
CSS0003370	60.2053	61.5876	59.5984	743.114	617.981	719.765	60.4638	693.62	-3.521	7.15885e-105	2.71438e-103	CSS0003370	Chr6	42582729	42597939	+	2804	protein_coding	- && sp|Q9ZT92|AK10B_ARATH RNA demethylase ALKBH10B OS=Arabidopsis thaliana OX=3702 GN=ALKBH10B PE=1 SV=1 && -	-
CSS0049975	261.893	190.466	223.014	1304.13	1169.31	1177.44	225.124	1216.96	-2.43075	7.62002e-105	2.88659e-103	CSS0049975	Chr13	99705565	99706660	-	634	protein_coding	- && - && PF00582:Universal stress protein family	Usp
CSS0026846	126.431	166.515	166.299	934.41	969.344	946.647	153.082	950.134	-2.63561	1.19101e-104	4.50759e-103	CSS0026846	Chr1	157290854	157317492	-	3065	protein_coding	- && sp|Q5N8X6|BGAL3_ORYSJ Beta-galactosidase 3 OS=Oryza sativa subsp. japonica OX=39947 GN=Os01g0875500 PE=3 SV=1 && PF02140:Galactose binding lectin domain|PF17834:Beta-sandwich domain in beta galactosidase|PF01301:Glycosyl hydrolases family 35	-
CSS0045365	114.39	155.11	124.003	1052.13	879.837	930.022	131.168	953.997	-2.8689	1.71656e-104	6.49071e-103	CSS0045365	Chr12	146375686	146381147	+	696	protein_coding	- && sp|P81370|TLP_ACTDE Thaumatin-like protein OS=Actinidia deliciosa OX=3627 GN=tlp PE=1 SV=2 && PF00314:Thaumatin family	Thaumatin
CSS0032369	1233.2	1188.41	1180.43	2748.97	2916.6	2796.91	1200.68	2820.83	-1.23211	1.99529e-104	7.53773e-103	CSS0032369	Chr1	146312700	146329689	+	2235	protein_coding	- && sp|Q9LFU1|ASNS3_ARATH Asparagine synthetase [glutamine-hydrolyzing] 3 OS=Arabidopsis thaliana OX=3702 GN=ASN3 PE=2 SV=1 && PF13537:Glutamine amidotransferase domain|PF00733:Asparagine synthase	-
CSS0023795	1845.29	1630.93	1768.73	517.788	554.183	535.912	1748.32	535.961	1.70664	5.04884e-104	1.90559e-102	CSS0023795	Contig1301	86139	110638	-	1997	protein_coding	- && sp|P93604|LRK10_WHEAT Rust resistance kinase Lr10 OS=Triticum aestivum OX=4565 GN=LRK10 PE=2 SV=1 && PF00069:Protein kinase domain	Pkinase
CSS0017756	965.291	934.079	1003.56	187.618	144.735	144.735	967.644	159.029	2.60365	6.61668e-104	2.49506e-102	CSS0017756	Chr4	13757663	13762276	+	1748	protein_coding	- && sp|Q8GUH2|Y1015_ARATH Uncharacterized protein At1g01500 OS=Arabidopsis thaliana OX=3702 GN=At1g01500 PE=2 SV=1 && -	-
CSS0009171	2163.38	2047.22	2019.62	734.836	715.106	777.463	2076.74	742.468	1.48424	7.83737e-104	2.95267e-102	CSS0009171	Chr12	131702308	131715149	-	2160	protein_coding	- && sp|Q40546|KPYG_TOBAC Pyruvate kinase isozyme G, chloroplastic OS=Nicotiana tabacum OX=4097 PE=2 SV=1 && PF00224:Pyruvate kinase, barrel domain|PF02887:Pyruvate kinase, alpha/beta domain	PK
CSS0012591	1843.29	1687.96	1829.29	591.364	521.808	537.868	1786.84	550.347	1.69907	8.6843e-104	3.26876e-102	CSS0012591	Chr13	72240162	72243112	+	847	protein_coding	- && - && PF06916:Protein of unknown function (DUF1279)	-
CSS0035820	65.2224	99.2245	76.9012	767.026	742.72	735.412	80.4494	748.386	-3.2267	9.24065e-104	3.475e-102	CSS0035820	Chr15	4783878	4794073	+	2554	protein_coding	- && sp|Q9C8M9|SRF6_ARATH Protein STRUBBELIG-RECEPTOR FAMILY 6 OS=Arabidopsis thaliana OX=3702 GN=SRF6 PE=1 SV=1 && -	-
CSS0046951	174.595	144.845	139.383	891.184	994.102	945.669	152.941	943.652	-2.62444	1.2265e-103	4.60814e-102	CSS0046951	Contig870	10205	21722	+	2226	protein_coding	- && sp|Q9SDZ9|PPAF2_IPOBA Purple acid phosphatase 2 OS=Ipomoea batatas OX=4120 GN=PAP2 PE=1 SV=1 && PF00149:Calcineurin-like phosphoesterase|PF14008:Iron/zinc purple acid phosphatase-like protein C|PF16656:Purple acid Phosphatase, N-terminal domain	Metallophos
CSS0036315	905.086	1046.99	839.185	2733.33	2680.46	2687.38	930.42	2700.39	-1.53995	1.51358e-103	5.68157e-102	CSS0036315	Chr8	120433846	120435697	-	1005	protein_coding	- && sp|P0CG85|UBI1P_NICSY Polyubiquitin OS=Nicotiana sylvestris OX=4096 GN=UBI11 PE=2 SV=1 && PF00240:Ubiquitin family	ubiquitin
CSS0001553	1031.52	1023.04	1061.24	184.859	198.059	230.794	1038.6	204.57	2.34564	1.78494e-103	6.688e-102	CSS0001553	Chr4	179235385	179238461	+	1158	protein_coding	- && sp|Q0PGJ6|AKRC9_ARATH NADPH-dependent aldo-keto reductase, chloroplastic OS=Arabidopsis thaliana OX=3702 GN=AKR4C9 PE=1 SV=1 && PF00248:Aldo/keto reductase family	Aldo_ket_red
CSS0027638	2189.47	2047.22	2138.82	802.894	795.091	751.059	2125.17	783.014	1.44056	1.89536e-103	7.09531e-102	CSS0027638	Chr1	192961036	192966016	-	2084	protein_coding	- && sp|Q0JP99|Y1341_ORYSJ B3 domain-containing protein Os01g0234100 OS=Oryza sativa subsp. japonica OX=39947 GN=Os01g0234100 PE=2 SV=1 && PF02362:B3 DNA binding domain	B3
CSS0001246	35.1197	37.6369	24.0316	569.291	674.161	731.5	32.2628	658.317	-4.36163	2.05602e-103	7.68979e-102	CSS0001246	Chr9	141047904	141049243	+	1340	protein_coding	- && sp|C0Z2L5|BZP44_ARATH bZIP transcription factor 44 OS=Arabidopsis thaliana OX=3702 GN=BZIP44 PE=1 SV=1 && PF00170:bZIP transcription factor	bZIP_1
CSS0009850	39.1334	38.7774	32.683	629.071	638.929	556.448	36.8646	608.15	-4.04834	1.03938e-102	3.8839e-101	CSS0009850	Chr8	136168469	136170137	+	1279	protein_coding	- && sp|Q9LP56|WRK65_ARATH Probable WRKY transcription factor 65 OS=Arabidopsis thaliana OX=3702 GN=WRKY65 PE=2 SV=1 && PF03106:WRKY DNA -binding domain	WRKY
CSS0030957	175.599	198.449	202.827	1042.01	951.253	1083.56	192.292	1025.61	-2.41545	1.28689e-102	4.80443e-101	CSS0030957	Chr11	103833944	103843914	-	1754	protein_coding	- && sp|O81020|NPC2_ARATH Non-specific phospholipase C2 OS=Arabidopsis thaliana OX=3702 GN=NPC2 PE=2 SV=1 && PF04185:Phosphoesterase family	Phosphoesterase
CSS0020290	1154.94	1204.38	1197.74	296.142	306.61	304.14	1185.69	302.297	1.97172	1.43899e-102	5.36741e-101	CSS0020290	Chr9	36740996	36742698	+	1703	protein_coding	- && sp|F8WKW0|UGT1_GARJA Crocetin glucosyltransferase, chloroplastic OS=Gardenia jasminoides OX=114476 GN=UGT75L6 PE=1 SV=1 && PF00201:UDP-glucoronosyl and UDP-glucosyl transferase	UDPGT
CSS0036414	1083.7	1061.82	1126.6	185.778	218.055	147.669	1090.7	183.834	2.56793	1.60526e-102	5.98222e-101	CSS0036414	Chr6	41136410	41164632	+	3652	protein_coding	- && sp|Q9LQV2|RDR1_ARATH RNA-dependent RNA polymerase 1 OS=Arabidopsis thaliana OX=3702 GN=RDR1 PE=2 SV=1 && PF05183:RNA dependent RNA polymerase	-
CSS0005839	44.1505	50.1825	47.102	657.582	727.484	581.875	47.145	655.647	-3.80055	2.74501e-102	1.02204e-100	CSS0005839	Chr10	4994151	4996065	+	546	protein_coding	- && sp|Q9FYA2|WRK75_ARATH Probable WRKY transcription factor 75 OS=Arabidopsis thaliana OX=3702 GN=WRKY75 PE=1 SV=1 && PF03106:WRKY DNA -binding domain	WRKY
CSS0013528	861.939	772.127	902.628	88.2907	126.643	97.7941	845.565	104.243	3.02166	3.05106e-102	1.13497e-100	CSS0013528	Chr6	138635634	138637092	-	862	protein_coding	- && sp|Q5HZ36|GAT21_ARATH GATA transcription factor 21 OS=Arabidopsis thaliana OX=3702 GN=GATA21 PE=1 SV=2 && PF00320:GATA zinc finger	GATA
CSS0017818	1221.16	1127.97	1188.12	7.35756	5.71323	2.93382	1179.08	5.33487	7.77671	3.54457e-102	1.31736e-100	CSS0017818	Chr3	21190012	21191601	+	1590	protein_coding	- && - && -	-
CSS0019012	669.282	601.05	704.607	2090.47	1992.96	1942.19	658.313	2008.54	-1.60712	6.03026e-102	2.23917e-100	CSS0019012	Chr2	91063732	91065984	+	2253	protein_coding	- && sp|Q9SKB2|SBIR1_ARATH Leucine-rich repeat receptor-like serine/threonine/tyrosine-protein kinase SOBIR1 OS=Arabidopsis thaliana OX=3702 GN=SOBIR1 PE=1 SV=1 && PF00069:Protein kinase domain|PF13855:Leucine rich repeat	Pkinase
CSS0019978	29.0992	57.0256	49.9858	713.683	630.36	676.735	45.3702	673.593	-3.9011	7.1793e-102	2.66344e-100	CSS0019978	Contig88	64076	69565	+	1364	protein_coding	- && sp|Q8GSM7|HST_TOBAC Shikimate O-hydroxycinnamoyltransferase OS=Nicotiana tabacum OX=4097 GN=HST PE=1 SV=1 && PF02458:Transferase family	-
novel.3214	1123.83	1123.4	1175.63	276.828	254.239	285.559	1140.95	272.209	2.06787	1.08848e-101	4.03452e-100	-	Chr15	30502502	30531139	-	1551	-	- && sp|Q6NPM5|ATS3B_ARATH Embryo-specific protein ATS3B OS=Arabidopsis thaliana OX=3702 GN=ATS3B PE=1 SV=1 && -	-
CSS0019815	2678.13	2861.54	2732.88	1205.72	1140.74	1168.64	2757.52	1171.7	1.23417	1.75039e-101	6.48211e-100	CSS0019815	Chr4	127941760	127949032	+	2028	protein_coding	- && sp|Q682S0|RPT2_ARATH Root phototropism protein 2 OS=Arabidopsis thaliana OX=3702 GN=RPT2 PE=1 SV=2 && PF03000:NPH3 family|PF00651:BTB/POZ domain	BTB
CSS0029721	2690.17	2696.17	2537.74	1061.33	1122.65	1022.93	2641.36	1068.97	1.30459	2.16808e-101	8.02169e-100	CSS0029721	Chr13	16970874	17000197	+	2928	protein_coding	- && sp|F4K410|SVR3_ARATH Putative elongation factor TypA-like SVR3, chloroplastic OS=Arabidopsis thaliana OX=3702 GN=SVR3 PE=1 SV=1 && PF13041:PPR repeat family|PF00009:Elongation factor Tu GTP binding domain|PF03144:Elongation factor Tu domain 2|PF00679:Elongation factor G C-terminus	GTP_EFTU
CSS0020416	2176.42	2129.34	2248.4	844.28	826.514	869.389	2184.72	846.728	1.368	2.21592e-101	8.19138e-100	CSS0020416	Chr10	89587371	89588846	-	725	protein_coding	- && sp|Q65WT0|BD31B_ORYSJ Protein BUD31 homolog 2 OS=Oryza sativa subsp. japonica OX=39947 GN=Os05g0446300 PE=2 SV=1 && PF01125:G10 protein	-
novel.3710	129.441	92.3815	123.042	814.85	866.506	822.448	114.955	834.601	-2.85281	3.14615e-101	1.16196e-99	-	Chr2	15368533	15371606	-	2689	-	- && - && -	-
CSS0008740	1261.3	1170.17	1236.19	288.784	317.084	318.809	1222.55	308.226	1.98894	6.99161e-101	2.57759e-99	CSS0008740	Chr3	3120860	3124420	-	1317	protein_coding	- && sp|O48832|ERD7_ARATH Protein EARLY-RESPONSIVE TO DEHYDRATION 7, chloroplastic OS=Arabidopsis thaliana OX=3702 GN=ERD7 PE=1 SV=1 && PF06911:Senescence-associated protein	-
CSS0031808	886.021	958.03	920.892	176.581	185.68	167.228	921.648	176.496	2.38384	9.78016e-101	3.60243e-99	CSS0031808	Chr6	33779316	33779881	+	566	protein_coding	- && - && -	-
CSS0027135	670.285	630.703	645.97	13.7954	6.66543	10.7574	648.986	10.4061	5.95836	1.56609e-100	5.76339e-99	CSS0027135	Contig135	590747	593945	+	940	protein_coding	- && - && PF03745:Domain of unknown function (DUF309)	-
CSS0039035	73.2498	38.7774	43.2569	734.836	719.867	668.912	51.7614	707.872	-3.7663	2.25559e-100	8.29345e-99	CSS0039035	Chr1	123890916	123895012	+	1214	protein_coding	- && sp|Q9FDZ5|URGT6_ARATH UDP-rhamnose/UDP-galactose transporter 6 OS=Arabidopsis thaliana OX=3702 GN=URGT6 PE=1 SV=1 && PF03151:Triose-phosphate Transporter family	-
CSS0017722	42.1437	52.4636	41.3344	642.867	597.032	580.897	45.3139	606.932	-3.75163	3.04915e-100	1.12013e-98	CSS0017722	Chr8	67298484	67304137	+	1526	protein_coding	- && sp|Q9ZV88|BEH4_ARATH BES1/BZR1 homolog protein 4 OS=Arabidopsis thaliana OX=3702 GN=BEH4 PE=1 SV=1 && PF05687:BES1/BZR1 plant transcription factor, N-terminal	-
CSS0024578	81.2771	106.068	101.894	767.945	760.812	723.676	96.413	750.811	-2.9641	3.45041e-100	1.26641e-98	CSS0024578	Chr2	30971834	30976761	-	1467	protein_coding	- && sp|W8JMU7|CYQ32_CATRO Cytochrome P450 81Q32 OS=Catharanthus roseus OX=4058 GN=CYP81Q32 PE=2 SV=1 && PF00067:Cytochrome P450	p450
CSS0048106	116.397	117.473	105.739	782.66	746.529	770.617	113.203	766.602	-2.76169	4.72802e-100	1.73225e-98	CSS0048106	Contig579	165741	176146	-	990	protein_coding	- && sp|Q9M066|C90C1_ARATH 3-epi-6-deoxocathasterone 23-monooxygenase CYP90C1 OS=Arabidopsis thaliana OX=3702 GN=CYP90C1 PE=1 SV=3 && PF00067:Cytochrome P450	p450
CSS0038244	763.604	763.003	774.78	1984.7	2019.63	2089.86	767.129	2031.4	-1.4046	6.5716e-100	2.40344e-98	CSS0038244	Chr6	29250884	29258583	+	3150	protein_coding	- && sp|Q9S7Y7|XYL1_ARATH Alpha-xylosidase 1 OS=Arabidopsis thaliana OX=3702 GN=XYL1 PE=1 SV=1 && PF01055:Glycosyl hydrolases family 31|PF13802:Galactose mutarotase-like|PF16863:N-terminal barrel of NtMGAM and CtMGAM, maltase-glucoamylase	Glyco_hydro_31
CSS0013546	860.936	911.269	808.424	2265.21	2240.54	2241.44	860.21	2249.06	-1.38829	8.22982e-100	3.00723e-98	CSS0013546	Chr1	31710339	31723939	-	2666	protein_coding	- && sp|O04015|P5CS_ACTDE Delta-1-pyrroline-5-carboxylate synthase OS=Actinidia deliciosa OX=3627 PE=2 SV=1 && PF00171:Aldehyde dehydrogenase family|PF00696:Amino acid kinase family	AA_kinase
CSS0015205	214.732	181.341	153.802	998.789	1054.09	1073.78	183.292	1042.22	-2.50851	1.67434e-99	6.11273e-98	CSS0015205	Chr5	20415130	20419610	+	2388	protein_coding	- && sp|O81832|Y4729_ARATH G-type lectin S-receptor-like serine/threonine-protein kinase At4g27290 OS=Arabidopsis thaliana OX=3702 GN=At4g27290 PE=3 SV=4 && PF08276:PAN-like domain|PF11883:Domain of unknown function (DUF3403)|PF07714:Protein tyrosine kinase|PF01453:D-mannose binding lectin|PF00954:S-locus glycoprotein domain	Pkinase_Tyr
CSS0044682	3356.44	3182.03	3449.02	1494.5	1461.63	1342.71	3329.16	1432.95	1.21627	1.90579e-99	6.95161e-98	CSS0044682	Chr11	65283280	65285855	+	2576	protein_coding	- && sp|Q9XE58|SCL14_ARATH Scarecrow-like protein 14 OS=Arabidopsis thaliana OX=3702 GN=SCL14 PE=1 SV=2 && PF03514:GRAS domain family	GRAS
CSS0040835	721.46	789.234	714.22	103.926	109.504	105.618	741.638	106.349	2.80132	5.86831e-99	2.13676e-97	CSS0040835	Chr2	208984450	208987864	-	2000	protein_coding	- && sp|A0A1D6F9Y9|C92C6_MAIZE Trimethyltridecatetraene synthase OS=Zea mays OX=4577 GN=CYP92C6 PE=1 SV=1 && PF00067:Cytochrome P450	p450
CSS0033858	49.1676	35.3559	46.1407	603.32	569.418	615.125	43.5548	595.954	-3.76551	8.2504e-99	3.00147e-97	CSS0033858	Chr8	155448811	155450747	-	1207	protein_coding	- && sp|Q9FHE4|BRG1_ARATH BOI-related E3 ubiquitin-protein ligase 1 OS=Arabidopsis thaliana OX=3702 GN=BRG1 PE=1 SV=1 && PF13920:Zinc finger, C3HC4 type (RING finger)	-
CSS0032324	146.5	124.316	125.926	786.339	876.981	881.125	132.247	848.148	-2.67945	9.31157e-99	3.38454e-97	CSS0032324	Contig19	180605	183018	-	1783	protein_coding	- && sp|A0A2U7XUH7|CHIL1_HUMLU Chalcone isomerase-like protein 1 OS=Humulus lupulus OX=3486 GN=CHIL1 PE=1 SV=1 && -	-
CSS0031509	628.142	725.366	685.382	83.6922	72.3676	65.522	679.63	73.8606	3.19919	1.14985e-98	4.17577e-97	CSS0031509	Chr7	183263070	183267922	+	2542	protein_coding	- && sp|Q6LA42|APRR5_ARATH Two-component response regulator-like APRR5 OS=Arabidopsis thaliana OX=3702 GN=APRR5 PE=1 SV=2 && PF00072:Response regulator receiver domain|PF06203:CCT motif	Response_reg
CSS0023920	1698.79	1751.83	1717.78	575.729	618.933	591.654	1722.8	595.439	1.5327	1.28897e-98	4.67689e-97	CSS0023920	Chr10	1214766	1220209	+	1946	protein_coding	- && sp|P09043|G3PA_TOBAC Glyceraldehyde-3-phosphate dehydrogenase A, chloroplastic (Fragment) OS=Nicotiana tabacum OX=4097 GN=GAPA PE=2 SV=1 && PF02800:Glyceraldehyde 3-phosphate dehydrogenase, C-terminal domain|PF00044:Glyceraldehyde 3-phosphate dehydrogenase, NAD binding domain	-
CSS0028494	2642.01	2748.63	2780.94	1205.72	1213.11	1194.07	2723.86	1204.3	1.17739	1.5682e-98	5.68004e-97	CSS0028494	Chr11	119572116	119613548	-	2453	protein_coding	- && sp|Q9LJE2|SYKM_ARATH Lysine--tRNA ligase, chloroplastic/mitochondrial OS=Arabidopsis thaliana OX=3702 GN=OVA5 PE=2 SV=1 && PF00152:tRNA synthetases class II (D, K and N)|PF01336:OB-fold nucleic acid binding domain	tRNA-synt_2
CSS0044578	38.13	61.5876	57.6759	650.224	668.448	610.235	52.4645	642.969	-3.62096	2.92974e-98	1.06023e-96	CSS0044578	Chr4	12550286	12552681	-	753	protein_coding	- && - && -	-
CSS0022757	144.493	167.655	174.95	940.848	907.451	872.323	162.366	906.874	-2.48201	3.09892e-98	1.12047e-96	CSS0022757	Chr10	51132225	51134682	-	1259	protein_coding	- && sp|P81393|MYB08_ANTMA Myb-related protein 308 OS=Antirrhinum majus OX=4151 GN=MYB308 PE=2 SV=1 && PF00249:Myb-like DNA-binding domain	Myb_DNA-binding
CSS0038858	887.025	879.335	911.279	2499.73	2234.82	2320.65	892.546	2351.74	-1.39746	3.85734e-98	1.39225e-96	CSS0038858	Chr2	39400503	39403174	+	1841	protein_coding	- && sp|Q94A43|BEH2_ARATH BES1/BZR1 homolog protein 2 OS=Arabidopsis thaliana OX=3702 GN=BEH2 PE=1 SV=1 && PF05687:BES1/BZR1 plant transcription factor, N-terminal	-
CSS0007479	213.729	184.763	163.415	971.198	1034.09	995.544	187.302	1000.28	-2.41774	3.93056e-98	1.41744e-96	CSS0007479	Chr4	77588177	77605552	+	3264	protein_coding	- && sp|Q9SZV5|SBT26_ARATH Subtilisin-like protease SBT2.6 OS=Arabidopsis thaliana OX=3702 GN=SBT2.6 PE=2 SV=1 && -	-
CSS0028105	2603.88	2625.46	2651.17	1171.69	1135.98	1177.44	2626.84	1161.7	1.17714	3.95713e-98	1.42578e-96	CSS0028105	Chr2	151627807	151635917	+	1643	protein_coding	- && sp|Q0WPW5|RMR4_ARATH Receptor homology region, transmembrane domain- and RING domain-containing protein 4 OS=Arabidopsis thaliana OX=3702 GN=RMR4 PE=2 SV=1 && PF13639:Ring finger domain	-
CSS0015619	65.2224	71.8523	54.7921	737.595	649.404	627.838	63.9556	671.612	-3.3993	4.47029e-98	1.60926e-96	CSS0015619	Chr15	3039569	3044481	+	1785	protein_coding	- && sp|Q9LU40|MSR1_ARATH Protein MANNAN SYNTHESIS-RELATED 1 OS=Arabidopsis thaliana OX=3702 GN=MSR1 PE=2 SV=1 && PF10250:GDP-fucose protein O-fucosyltransferase	-
CSS0026123	781.665	748.176	768.051	114.042	130.452	111.485	765.964	118.66	2.69062	5.88057e-98	2.11511e-96	CSS0026123	Chr4	179984267	179987569	-	2511	protein_coding	- && sp|Q9LZN0|ROGF7_ARATH Rop guanine nucleotide exchange factor 7 OS=Arabidopsis thaliana OX=3702 GN=ROPGEF7 PE=1 SV=1 && PF03759:PRONE (Plant-specific Rop nucleotide exchanger)	DUF315
CSS0036555	104.356	104.927	142.267	844.28	817.944	826.36	117.183	829.528	-2.81791	6.40676e-98	2.30036e-96	CSS0036555	Chr4	24160948	24162166	+	848	protein_coding	- && - && PF14309:Domain of unknown function (DUF4378)	-
CSS0020289	481.642	431.114	406.615	1559.8	1495.91	1497.23	439.79	1517.65	-1.78716	1.09223e-97	3.91827e-96	CSS0020289	Chr9	35185459	35188298	+	2007	protein_coding	- && sp|P50246|SAHH_MEDSA Adenosylhomocysteinase OS=Medicago sativa OX=3879 GN=SAHH PE=2 SV=1 && PF00670:S-adenosyl-L-homocysteine hydrolase, NAD binding domain|PF05221:S-adenosyl-L-homocysteine hydrolase	-
CSS0001656	410.399	403.741	376.816	1340.92	1414.02	1364.23	396.986	1373.06	-1.79106	1.26076e-97	4.51891e-96	CSS0001656	Contig669	259	7637	+	1695	protein_coding	- && - && -	-
CSS0002396	624.128	583.942	573.875	47.8241	53.3235	59.6544	593.982	53.6007	3.47223	1.44264e-97	5.16634e-96	CSS0002396	Chr3	57604021	57605450	-	1398	protein_coding	- && sp|Q940V3|U91A1_ARATH UDP-glycosyltransferase 91A1 OS=Arabidopsis thaliana OX=3702 GN=UGT91A1 PE=2 SV=1 && -	-
CSS0001328	2428.28	2315.24	2409.89	1014.42	972.201	991.632	2384.47	992.752	1.26441	1.59263e-97	5.69854e-96	CSS0001328	Chr15	82252378	82262626	-	8693	protein_coding	- && - && -	-
CSS0035762	39236.8	44467.4	44969.9	16727.4	17256.8	16474.4	42891.4	16819.5	1.35053	2.6489e-97	9.46976e-96	CSS0035762	Chr4	144798300	144800029	+	506	protein_coding	- && - && -	-
CSS0017480	2863.76	3041.75	3015.49	1300.45	1357.84	1243.94	2973.67	1300.74	1.19256	2.84227e-97	1.01523e-95	CSS0017480	Chr10	122124378	122124689	+	261	protein_coding	- && sp|P62785|H41_WHEAT Histone H4 variant TH011 OS=Triticum aestivum OX=4565 PE=3 SV=2 && -	-
CSS0049206	394.345	423.13	446.027	1460.48	1494.01	1391.61	421.167	1448.7	-1.78202	4.28538e-97	1.52937e-95	CSS0049206	Chr10	148425791	148430221	-	1806	protein_coding	- && sp|P45960|TBB4_ORYSJ Tubulin beta-4 chain OS=Oryza sativa subsp. japonica OX=39947 GN=TUBB4 PE=2 SV=1 && PF03953:Tubulin C-terminal domain|PF00091:Tubulin/FtsZ family, GTPase domain	Tubulin
CSS0028759	701.392	768.705	804.579	117.721	100.934	101.706	758.225	106.787	2.82673	4.89647e-97	1.74594e-95	CSS0028759	Chr4	179587894	179596392	-	2643	protein_coding	- && sp|Q9LZM8|BLH9_ARATH BEL1-like homeodomain protein 9 OS=Arabidopsis thaliana OX=3702 GN=BLH9 PE=1 SV=1 && PF05920:Homeobox KN domain|PF07526:Associated with HOX	POX
CSS0016493	330.126	296.533	313.372	1176.29	1234.06	1200.91	313.344	1203.75	-1.9402	5.59534e-97	1.99342e-95	CSS0016493	Chr11	95017074	95018522	-	999	protein_coding	- && sp|Q9LYC1|GID1B_ARATH Gibberellin receptor GID1B OS=Arabidopsis thaliana OX=3702 GN=GID1B PE=1 SV=1 && PF07859:alpha/beta hydrolase fold	Abhydrolase_3
CSS0028191	173.592	172.217	175.912	931.651	882.694	871.345	173.907	895.23	-2.36368	6.84771e-97	2.43749e-95	CSS0028191	Chr13	73776554	73779982	+	822	protein_coding	- && - && PF02221:ML domain	-
CSS0015234	102.349	138.002	97.0878	800.135	802.709	818.537	112.48	807.127	-2.85197	1.1412e-96	4.05518e-95	CSS0015234	Contig485	13915	17677	+	1437	protein_coding	- && sp|O49204|KAPS_CATRO Adenylyl-sulfate kinase, chloroplastic OS=Catharanthus roseus OX=4058 GN=AKN PE=2 SV=1 && PF01583:Adenylylsulphate kinase	-
CSS0015085	143.489	193.887	140.345	927.053	1104.56	1134.41	159.24	1055.34	-2.73497	1.6523e-96	5.86629e-95	CSS0015085	Chr5	7770558	7780449	+	1754	protein_coding	- && sp|O65583|UKL4_ARATH Uridine kinase-like protein 4 OS=Arabidopsis thaliana OX=3702 GN=UKL4 PE=2 SV=2 && PF00485:Phosphoribulokinase / Uridine kinase family|PF14681:Uracil phosphoribosyltransferase	-
CSS0044963	1824.22	1817.98	1753.35	623.553	651.308	574.051	1798.51	616.304	1.54452	2.89683e-96	1.02672e-94	CSS0044963	Contig62	184000	187961	-	2191	protein_coding	- && sp|Q9M390|PTR1_ARATH Protein NRT1/ PTR FAMILY 8.1 OS=Arabidopsis thaliana OX=3702 GN=NPF8.1 PE=1 SV=1 && PF00854:POT family	-
CSS0050330	1370.67	1416.52	1256.37	3215.25	3027.06	3255.57	1347.85	3165.96	-1.23323	3.24848e-96	1.15037e-94	CSS0050330	Chr1	103140344	103152859	+	6617	protein_coding	- && sp|Q9LV03|GLUT1_ARATH Glutamate synthase 1 [NADH], chloroplastic OS=Arabidopsis thaliana OX=3702 GN=GLT1 PE=1 SV=2 && PF04898:Glutamate synthase central domain|PF07992:Pyridine nucleotide-disulphide oxidoreductase|PF00310:Glutamine amidotransferases class-II|PF14691:Dihydroprymidine dehydrogenase domain II, 4Fe-4S cluster|PF13450:NAD(P)-binding Rossmann-like domain|PF01493:GXGXG motif|PF0164…	GATase_2
CSS0023567	1647.62	1706.21	1661.07	3370.68	3366.04	3456.04	1671.63	3397.59	-1.02365	5.1236e-96	1.81284e-94	CSS0023567	Contig1254	787599	791010	-	1037	protein_coding	- && sp|Q9SI09|XERIC_ARATH Probable E3 ubiquitin-protein ligase XERICO OS=Arabidopsis thaliana OX=3702 GN=XERICO PE=1 SV=1 && PF13639:Ring finger domain	-
CSS0004040	3505.95	3575.51	3516.31	1760.3	1680.64	1786.7	3532.59	1742.55	1.01942	6.0956e-96	2.15491e-94	CSS0004040	Chr2	1309893	1314160	+	2737	protein_coding	- && sp|Q9LW29|AFB2_ARATH Protein AUXIN SIGNALING F-BOX 2 OS=Arabidopsis thaliana OX=3702 GN=AFB2 PE=1 SV=1 && PF18511:F-box|PF18791:Transport inhibitor response 1 protein domain	-
novel.775	22.0753	15.9672	25.9542	549.978	530.378	629.794	21.3322	570.05	-4.7242	8.77256e-96	3.09596e-94	-	Chr10	83342904	83346371	+	1195	-	- && sp|A3F5F0|SDH_SINHE Secoisolariciresinol dehydrogenase OS=Sinopodophyllum hexandrum OX=93608 GN=SDH PE=1 SV=1 && -	-
CSS0018980	129.441	158.531	95.1653	897.622	1054.09	970.117	127.713	973.943	-2.93994	8.98389e-96	3.16784e-94	CSS0018980	Chr12	131931451	131937972	+	1804	protein_coding	- && sp|Q42583|KPRS2_ARATH Ribose-phosphate pyrophosphokinase 2, chloroplastic OS=Arabidopsis thaliana OX=3702 GN=PRS2 PE=2 SV=2 && PF13793:N-terminal domain of ribose phosphate pyrophosphokinase|PF14572:Phosphoribosyl synthetase-associated domain	-
CSS0018950	44.1505	25.0913	22.1091	610.677	562.753	592.632	30.4503	588.688	-4.2695	1.34447e-95	4.73673e-94	CSS0018950	Chr8	133390781	133392789	-	2009	protein_coding	- && sp|Q1T7C2|C7111_SOLLC Cytochrome P450 710A11 OS=Solanum lycopersicum OX=4081 GN=CYP710A11 PE=1 SV=1 && PF00067:Cytochrome P450	p450
CSS0033141	2327.94	2154.43	2219.56	901.301	896.025	862.544	2233.98	886.623	1.33338	1.42351e-95	5.01091e-94	CSS0033141	Chr7	49355527	49376060	-	2946	protein_coding	- && sp|Q9ZR08|Y4230_ARATH G-type lectin S-receptor-like serine/threonine-protein kinase At4g03230 OS=Arabidopsis thaliana OX=3702 GN=At4g03230 PE=3 SV=3 && PF13947:Wall-associated receptor kinase galacturonan-binding|PF00954:S-locus glycoprotein domain|PF01453:D-mannose binding lectin|PF07714:Protein tyrosine kinase|PF08276:PAN-like domain	Pkinase_Tyr
CSS0038908	2952.07	2844.44	2768.44	1281.14	1269.29	1186.24	2854.98	1245.56	1.19631	1.76841e-95	6.21971e-94	CSS0038908	Chr3	176045035	176054740	+	4225	protein_coding	- && - && -	-
CSS0006766	38.13	36.4964	25.9542	541.7	568.466	552.537	33.5269	554.234	-4.0545	2.2843e-95	8.02732e-94	CSS0006766	Contig272	55668	62460	+	1937	protein_coding	- && sp|I3PB37|4CL1_PETHY 4-coumarate:CoA ligase 1 OS=Petunia hybrida OX=4102 GN=4CL1 PE=1 SV=1 && PF00501:AMP-binding enzyme|PF13193:AMP-binding enzyme C-terminal domain	AMP-binding
CSS0047909	2342.99	2380.25	2442.57	1036.5	988.389	972.073	2388.6	998.986	1.25744	2.35844e-95	8.2808e-94	CSS0047909	Chr3	57243852	57248419	+	552	protein_coding	- && sp|Q84J70|DI193_ARATH Protein DEHYDRATION-INDUCED 19 homolog 3 OS=Arabidopsis thaliana OX=3702 GN=DI19-3 PE=1 SV=1 && PF14571:Stress-induced protein Di19, C-terminal|PF05605:Drought induced 19 protein (Di19), zinc-binding	-
CSS0031465	200.684	171.077	169.183	1025.46	914.117	933.934	180.315	957.837	-2.40857	2.63721e-95	9.25174e-94	CSS0031465	Chr8	37678797	37683147	+	1321	protein_coding	- && sp|Q9SKU1|CLC1_ARATH Clathrin light chain 1 OS=Arabidopsis thaliana OX=3702 GN=At2g20760 PE=2 SV=1 && PF01086:Clathrin light chain	-
CSS0010822	2045.98	2071.17	2119.59	742.194	612.268	728.566	2078.91	694.343	1.58204	2.72602e-95	9.55517e-94	CSS0010822	Chr12	122702338	122707411	+	981	protein_coding	- && - && PF09353:Domain of unknown function (DUF1995)	-
CSS0000799	1683.74	1794.03	1828.33	617.115	624.646	622.948	1768.7	621.57	1.50871	3.09301e-95	1.08324e-93	CSS0000799	Chr4	14838680	14843553	+	2114	protein_coding	- && sp|Q8L7L0|OBGC_ARATH GTP-binding protein OBGC, chloroplastic OS=Arabidopsis thaliana OX=3702 GN=OBGL PE=2 SV=1 && PF01018:GTP1/OBG|PF01926:50S ribosome-binding GTPase|PF09269:Domain of unknown function (DUF1967)	-
novel.8120	1031.52	958.03	1059.31	229.004	236.147	223.948	1016.29	229.7	2.1461	4.40739e-95	1.53964e-93	-	Chr9	47815304	47823369	-	4498	-	- && - && -	-
CSS0025173	56.1916	34.2154	33.6443	584.926	606.554	607.301	41.3504	599.594	-3.85349	4.52354e-95	1.57888e-93	CSS0025173	Chr14	3711711	3715769	-	1587	protein_coding	- && sp|Q0V7T5|Y1864_ARATH Probable receptor-like protein kinase At1g80640 OS=Arabidopsis thaliana OX=3702 GN=At1g80640 PE=2 SV=1 && PF00069:Protein kinase domain	Pkinase
CSS0020551	1222.17	1321.85	1379.42	367.878	355.172	341.301	1307.81	354.784	1.88178	6.66791e-95	2.32538e-93	CSS0020551	Chr12	150237191	150248454	+	1947	protein_coding	- && sp|P92947|MDAR_ARATH Monodehydroascorbate reductase, chloroplastic/mitochondrial OS=Arabidopsis thaliana OX=3702 GN=MDAR5 PE=1 SV=3 && PF07992:Pyridine nucleotide-disulphide oxidoreductase	Pyr_redox_2
CSS0023061	543.854	539.462	527.735	35.8681	24.7573	40.0956	537.017	33.5737	4.00041	8.65925e-95	3.01729e-93	CSS0023061	Chr5	37084378	37085495	+	599	protein_coding	- && - && -	-
CSS0000375	42.1437	49.042	45.1795	667.699	634.168	533.956	45.4551	611.941	-3.75451	9.15841e-95	3.18853e-93	CSS0000375	Chr1	204654602	204661279	-	1566	protein_coding	- && sp|Q93XX5|Y5713_ARATH PI-PLC X domain-containing protein At5g67130 OS=Arabidopsis thaliana OX=3702 GN=At5g67130 PE=1 SV=1 && -	-
CSS0023161	662.258	546.305	596.946	45.9847	23.8051	41.0735	601.836	36.9545	4.02444	9.44883e-95	3.28687e-93	CSS0023161	Chr5	24795795	24797262	+	702	protein_coding	- && sp|Q9LD44|NAC56_ARATH NAC transcription factor 56 OS=Arabidopsis thaliana OX=3702 GN=NAC056 PE=2 SV=1 && PF02365:No apical meristem (NAM) protein	NAM
CSS0032454	63.2155	76.4143	90.3589	661.261	695.11	677.713	76.6629	678.028	-3.14238	1.28206e-94	4.45603e-93	CSS0032454	Chr3	6191751	6203198	+	3466	protein_coding	- && sp|Q8W474|DRL7_ARATH Probable disease resistance protein At1g58390 OS=Arabidopsis thaliana OX=3702 GN=At1g58390 PE=2 SV=4 && PF18052:Rx N-terminal domain|PF00931:NB-ARC domain	NB-ARC
CSS0020304	1649.62	1644.62	1648.57	567.452	547.518	595.566	1647.6	570.179	1.53115	1.53364e-94	5.32594e-93	CSS0020304	Chr3	13705740	13706778	+	634	protein_coding	- && sp|P80883|PETM_SPIOL Cytochrome b6-f complex subunit 7 (Fragment) OS=Spinacia oleracea OX=3562 GN=petM PE=1 SV=1 && PF08041:PetM family of cytochrome b6f complex subunit 7	-
CSS0006630	568.94	545.165	626.745	54.262	46.658	52.8088	580.283	51.2429	3.50173	1.58134e-94	5.48699e-93	CSS0006630	Chr4	146515017	146521944	-	1563	protein_coding	- && sp|Q9FN89|RIBA3_ARATH Monofunctional riboflavin biosynthesis protein RIBA 3, chloroplastic OS=Arabidopsis thaliana OX=3702 GN=RIBA3 PE=1 SV=1 && PF00925:GTP cyclohydrolase II|PF00926:3,4-dihydroxy-2-butanone 4-phosphate synthase	DHBP_synthase
CSS0019056	1914.53	1884.13	1911	696.209	735.102	652.287	1903.22	694.533	1.45417	3.47974e-94	1.20337e-92	CSS0019056	Chr9	2846740	2864382	-	2913	protein_coding	- && sp|Q8RWB8|UPL6_ARATH E3 ubiquitin-protein ligase UPL6 OS=Arabidopsis thaliana OX=3702 GN=UPL6 PE=2 SV=1 && PF00632:HECT-domain (ubiquitin-transferase)	HECT
CSS0049461	27.0924	13.6861	14.419	675.056	517.047	657.176	18.3992	616.427	-5.05775	3.95015e-94	1.3649e-92	CSS0049461	Contig24	387302	392380	-	1288	protein_coding	- && sp|Q9SSE5|COL9_ARATH Zinc finger protein CONSTANS-LIKE 9 OS=Arabidopsis thaliana OX=3702 GN=COL9 PE=1 SV=1 && PF06203:CCT motif	CCT
CSS0033090	1979.75	1910.36	1899.46	755.989	737.007	724.654	1929.86	739.217	1.38426	4.03029e-94	1.39143e-92	CSS0033090	Chr14	5204992	5207102	+	2111	protein_coding	- && sp|Q8W1D5|CIPKP_ARATH CBL-interacting serine/threonine-protein kinase 25 OS=Arabidopsis thaliana OX=3702 GN=CIPK25 PE=2 SV=1 && PF03822:NAF domain|PF00069:Protein kinase domain	Pkinase
CSS0029411	24.0821	21.6697	14.419	505.832	581.797	591.654	20.0569	559.761	-4.81107	4.99553e-94	1.72323e-92	CSS0029411	Chr4	18194910	18196322	-	1413	protein_coding	- && sp|O22227|MIZ1_ARATH Protein MIZU-KUSSEI 1 OS=Arabidopsis thaliana OX=3702 GN=MIZ1 PE=1 SV=1 && PF04759:Protein of unknown function, DUF617	-
CSS0021267	510.741	512.09	569.069	28.5105	23.8051	37.1618	530.633	29.8258	4.15635	7.54792e-94	2.60151e-92	CSS0021267	Chr2	77187751	77190802	-	2085	protein_coding	- && sp|Q93ZL5|CDF2_ARATH Cyclic dof factor 2 OS=Arabidopsis thaliana OX=3702 GN=CDF2 PE=1 SV=2 && PF02701:Dof domain, zinc finger	zf-Dof
CSS0001796	12.0411	21.6697	20.1866	612.517	510.382	588.72	17.9658	570.54	-4.9971	7.94278e-94	2.73532e-92	CSS0001796	Chr11	7822544	7824323	+	1780	protein_coding	- && - && PF04398:Protein of unknown function, DUF538	-
CSS0037440	166.568	133.44	141.306	863.594	840.797	829.294	147.105	844.561	-2.51896	8.04099e-94	2.76684e-92	CSS0037440	Chr4	155788016	155792079	-	1855	protein_coding	- && sp|Q8H443|AP23_ORYSJ APETALA2-like protein 3 OS=Oryza sativa subsp. japonica OX=39947 GN=AP2-3 PE=1 SV=1 && PF00847:AP2 domain	AP2
CSS0012274	2516.58	2575.28	2655.01	1152.38	1143.6	1131.48	2582.29	1142.48	1.17653	8.64623e-94	2.97262e-92	CSS0012274	Chr8	22124078	22126824	+	2043	protein_coding	- && sp|Q9M0X5|CRK25_ARATH Cysteine-rich receptor-like protein kinase 25 OS=Arabidopsis thaliana OX=3702 GN=CRK25 PE=3 SV=1 && PF01657:Salt stress response/antifungal|PF07714:Protein tyrosine kinase	Pkinase_Tyr
CSS0007502	885.018	897.583	746.903	132.436	118.073	94.8603	843.168	115.123	2.86967	8.83922e-94	3.03644e-92	CSS0007502	Chr2	206724088	206726071	+	870	protein_coding	- && - && PF00583:Acetyltransferase (GNAT) family	Acetyltransf_1
CSS0006747	317.081	305.657	314.334	1272.86	1129.31	1245.9	312.357	1216.02	-1.96035	9.82127e-94	3.37099e-92	CSS0006747	Chr8	41036221	41048326	+	2178	protein_coding	- && sp|Q9SGN6|NSL1_ARATH MACPF domain-containing protein NSL1 OS=Arabidopsis thaliana OX=3702 GN=NSL1 PE=2 SV=1 && PF01823:MAC/Perforin domain	-
CSS0020188	1270.33	1345.8	1403.45	389.951	386.595	351.081	1339.86	375.876	1.8333	1.05333e-93	3.61238e-92	CSS0020188	Chr13	122445631	122447064	-	1317	protein_coding	- && - && PF01593:Flavin containing amine oxidoreductase	Amino_oxidase
CSS0022470	3414.64	3454.61	3427.87	1711.55	1538.76	1598.93	3432.38	1616.42	1.08603	1.08442e-93	3.71593e-92	CSS0022470	Chr3	12584372	12588587	-	1978	protein_coding	- && sp|Q8VZ80|PLT5_ARATH Polyol transporter 5 OS=Arabidopsis thaliana OX=3702 GN=PLT5 PE=1 SV=2 && PF00083:Sugar (and other) transporter	Sugar_tr
CSS0034736	38.13	31.9343	25.9542	514.109	571.323	563.294	32.0062	549.575	-4.10454	1.16577e-93	3.99137e-92	CSS0034736	Chr1	213327870	213331270	+	1962	protein_coding	- && sp|Q9FNE1|CRK42_ARATH Cysteine-rich receptor-like protein kinase 42 OS=Arabidopsis thaliana OX=3702 GN=CRK42 PE=2 SV=1 && PF07714:Protein tyrosine kinase|PF01657:Salt stress response/antifungal	Pkinase_Tyr
CSS0029601	838.86	790.375	838.223	141.633	159.97	131.044	822.486	144.216	2.51177	1.27587e-93	4.36469e-92	CSS0029601	Chr4	48004551	48023725	-	2088	protein_coding	- && sp|O49285|ACR3_ARATH ACT domain-containing protein ACR3 OS=Arabidopsis thaliana OX=3702 GN=ACR3 PE=2 SV=1 && PF01842:ACT domain	ACT
CSS0042456	1201.1	1240.88	1316.93	356.842	321.845	341.301	1252.97	339.996	1.88172	1.4495e-93	4.95459e-92	CSS0042456	Chr5	56642699	56649168	-	821	protein_coding	- && - && PF07647:SAM domain (Sterile alpha motif)	SAM_2
CSS0005723	1178.02	1148.5	1142.94	313.616	316.132	321.743	1156.49	317.164	1.86664	1.85243e-93	6.32662e-92	CSS0005723	Contig641	760140	770455	+	1557	protein_coding	- && sp|O22494|GSHB_SOLLC Glutathione synthetase, chloroplastic OS=Solanum lycopersicum OX=4081 GN=GSH2 PE=2 SV=1 && PF03199:Eukaryotic glutathione synthase|PF03917:Eukaryotic glutathione synthase, ATP binding domain	-
CSS0032528	245.838	263.458	277.806	1086.16	1084.56	1057.15	262.367	1075.96	-2.03559	1.86333e-93	6.35856e-92	CSS0032528	Chr7	13933824	13939640	+	3100	protein_coding	- && sp|Q9H8M2|BRD9_HUMAN Bromodomain-containing protein 9 OS=Homo sapiens OX=9606 GN=BRD9 PE=1 SV=2 && PF00439:Bromodomain	Bromodomain
CSS0041799	1498.11	1599	1464.97	410.184	483.72	451.809	1520.69	448.571	1.76126	2.20771e-93	7.52755e-92	CSS0041799	Chr9	61672456	61683067	+	2759	protein_coding	- && sp|Q9CAP8|LACS9_ARATH Long chain acyl-CoA synthetase 9, chloroplastic OS=Arabidopsis thaliana OX=3702 GN=LACS9 PE=1 SV=1 && PF00501:AMP-binding enzyme	AMP-binding
CSS0015940	2576.79	2365.42	2497.37	989.592	1055.04	960.338	2479.86	1001.66	1.30825	2.39503e-93	8.15949e-92	CSS0015940	Chr10	14375938	14383413	-	2793	protein_coding	- && sp|Q93ZS4|NIK3_ARATH Protein NSP-INTERACTING KINASE 3 OS=Arabidopsis thaliana OX=3702 GN=NIK3 PE=1 SV=1 && -	-
CSS0039370	959.271	887.318	872.829	187.618	156.162	178.963	906.473	174.248	2.37879	3.49517e-93	1.18977e-91	CSS0039370	Chr4	40918674	40922545	+	3727	protein_coding	- && sp|Q8VZG8|MIK2_ARATH MDIS1-interacting receptor like kinase 2 OS=Arabidopsis thaliana OX=3702 GN=MIK2 PE=1 SV=3 && PF08263:Leucine rich repeat N-terminal domain|PF13855:Leucine rich repeat|PF00069:Protein kinase domain	Pkinase
CSS0017062	20.0684	17.1077	12.4964	593.203	581.797	510.485	16.5575	561.829	-5.09086	3.51568e-93	1.19577e-91	CSS0017062	Chr12	121828814	121831005	-	1293	protein_coding	- && sp|Q9S972|SD16_ARATH Receptor-like serine/threonine-protein kinase SD1-6 OS=Arabidopsis thaliana OX=3702 GN=SD16 PE=1 SV=2 && PF11883:Domain of unknown function (DUF3403)|PF07714:Protein tyrosine kinase	Pkinase_Tyr
CSS0009759	689.351	731.068	756.516	101.166	116.169	88.9926	725.645	102.109	2.82842	4.15532e-93	1.41216e-91	CSS0009759	Contig1040	543590	545272	+	1683	protein_coding	- && sp|O22932|CIPKB_ARATH CBL-interacting serine/threonine-protein kinase 11 OS=Arabidopsis thaliana OX=3702 GN=CIPK11 PE=1 SV=1 && PF03822:NAF domain|PF00069:Protein kinase domain	Pkinase
novel.7228	188.643	172.217	175.912	894.863	860.793	911.441	178.924	889.032	-2.31188	4.77299e-93	1.62074e-91	-	Chr7	147153749	147157012	-	1178	-	- && sp|Q944B6|TYRA1_ARATH Arogenate dehydrogenase 1, chloroplastic OS=Arabidopsis thaliana OX=3702 GN=TYRAAT1 PE=1 SV=1 && PF02153:Prephenate dehydrogenase	-
CSS0029608	4484.29	4477.65	4707.32	2342.46	2255.77	2074.21	4556.42	2224.15	1.03449	8.57775e-93	2.9103e-91	CSS0029608	Chr6	81526377	81529566	-	1652	protein_coding	- && sp|Q6IQ49|SDE2_HUMAN Replication stress response regulator SDE2 OS=Homo sapiens OX=9606 GN=SDE2 PE=1 SV=1 && PF13019:Silencing defective 2 N-terminal ubiquitin domain|PF13297:Telomere stability C-terminal	-
CSS0050299	8.02737	3.42154	1.92253	1501.86	1382.6	1503.1	4.45715	1462.52	-8.35664	1.22553e-92	4.15462e-91	CSS0050299	Chr14	24381610	24384325	+	926	protein_coding	- && sp|Q84MC2|LOG8_ARATH Cytokinin riboside 5'-monophosphate phosphoribohydrolase LOG8 OS=Arabidopsis thaliana OX=3702 GN=LOG8 PE=1 SV=1 && PF03641:Possible lysine decarboxylase	-
CSS0031567	643.193	606.752	745.942	76.3347	58.0845	72.3676	665.296	68.9289	3.27116	1.25056e-92	4.23599e-91	CSS0031567	Contig1142	264965	266327	+	903	protein_coding	- && - && -	-
CSS0021777	7.02395	5.70256	10.5739	858.075	736.054	732.478	7.76681	775.536	-6.62021	1.41466e-92	4.78794e-91	CSS0021777	Chr12	120655778	120657940	-	1401	protein_coding	- && sp|K4CI52|ABAH2_SOLLC Abscisic acid 8'-hydroxylase CYP707A2 OS=Solanum lycopersicum OX=4081 GN=CYP707A2 PE=2 SV=1 && PF00067:Cytochrome P450	p450
novel.9159	859.932	720.804	781.509	2126.33	2320.52	2238.51	787.415	2228.45	-1.4992	1.42138e-92	4.80674e-91	-	Contig44	200533	211584	-	11052	-	- && - && -	-
CSS0007714	400.365	345.575	351.823	1310.57	1337.85	1284.04	365.921	1310.82	-1.83982	1.84989e-92	6.25073e-91	CSS0007714	Contig954	19562	21217	-	1350	protein_coding	- && sp|P48386|CHS1_CAMSI Chalcone synthase 1 OS=Camellia sinensis OX=4442 GN=CHS1 PE=2 SV=1 && PF02797:Chalcone and stilbene synthases, C-terminal domain|PF00195:Chalcone and stilbene synthases, N-terminal domain	Chal_sti_synt_N
CSS0040980	1404.79	1748.4	1587.05	370.637	422.779	420.515	1580.08	404.644	1.96512	2.51936e-92	8.50589e-91	CSS0040980	Chr6	95492193	95494813	-	1166	protein_coding	- && sp|B2X050|MNR1_CAPAN (+)-neomenthol dehydrogenase OS=Capsicum annuum OX=4072 GN=MNR1 PE=1 SV=1 && PF00106:short chain dehydrogenase|PF13561:Enoyl-(Acyl carrier protein) reductase	adh_short
CSS0000814	1038.54	1134.81	1016.06	2530.08	2498.59	2552.43	1063.14	2527.03	-1.25074	3.83372e-92	1.29329e-90	CSS0000814	Chr5	26854771	26862529	+	2210	protein_coding	- && sp|O23144|PPI1_ARATH Proton pump-interactor 1 OS=Arabidopsis thaliana OX=3702 GN=PPI1 PE=1 SV=2 && -	-
CSS0029511	186.636	206.433	192.253	1075.12	899.834	988.698	195.107	987.885	-2.34202	5.96463e-92	2.00885e-90	CSS0029511	Contig225	668778	683102	+	2304	protein_coding	- && sp|Q75HE6|MTHR_ORYSJ Probable methylenetetrahydrofolate reductase OS=Oryza sativa subsp. japonica OX=39947 GN=Os03g0815200 PE=2 SV=1 && PF02219:Methylenetetrahydrofolate reductase	-
CSS0013678	1607.48	1585.31	1496.69	3380.8	3231.78	3246.76	1563.16	3286.45	-1.07269	8.20806e-92	2.76217e-90	CSS0013678	Chr4	179007242	179013987	-	2965	protein_coding	- && sp|P0C7P8|LHWL1_ARATH Transcription factor EMB1444 OS=Arabidopsis thaliana OX=3702 GN=EMB1444 PE=2 SV=1 && PF14215:bHLH-MYC and R2R3-MYB transcription factors N-terminal	-
CSS0006716	8.02737	5.70256	6.72886	817.609	876.028	805.823	6.8196	833.154	-6.92381	1.05587e-91	3.5503e-90	CSS0006716	Chr13	55240021	55245818	+	982	protein_coding	- && sp|Q9LFD5|BPA1_ARATH Binding partner of ACD11 1 OS=Arabidopsis thaliana OX=3702 GN=BPA1 PE=1 SV=1 && PF00076:RNA recognition motif. (a.k.a. RRM, RBD, or RNP domain)	RRM_1
CSS0004474	297.013	301.095	279.728	1294.93	1205.49	1101.16	292.612	1200.53	-2.03803	1.20984e-91	4.06474e-90	CSS0004474	Contig838	2286	4112	-	1495	protein_coding	- && sp|P48386|CHS1_CAMSI Chalcone synthase 1 OS=Camellia sinensis OX=4442 GN=CHS1 PE=2 SV=1 && PF02797:Chalcone and stilbene synthases, C-terminal domain|PF00195:Chalcone and stilbene synthases, N-terminal domain	Chal_sti_synt_N
CSS0027912	395.348	402.601	330.675	1439.32	1408.31	1329.02	376.208	1392.22	-1.89051	1.44307e-91	4.84439e-90	CSS0027912	Chr3	35435254	35442525	+	1898	protein_coding	- && sp|Q94F62|BAK1_ARATH BRASSINOSTEROID INSENSITIVE 1-associated receptor kinase 1 OS=Arabidopsis thaliana OX=3702 GN=BAK1 PE=1 SV=2 && PF00069:Protein kinase domain|PF13855:Leucine rich repeat|PF08263:Leucine rich repeat N-terminal domain	Pkinase
CSS0045899	212.725	247.491	223.975	966.599	1103.61	1084.54	228.064	1051.58	-2.20729	1.8256e-91	6.12353e-90	CSS0045899	Chr7	131201830	131226295	+	1393	protein_coding	- && sp|Q8LBW2|OTU9_ARATH OVARIAN TUMOR DOMAIN-containing deubiquitinating enzyme 9 OS=Arabidopsis thaliana OX=3702 GN=OTU9 PE=1 SV=1 && PF02338:OTU-like cysteine protease	OTU
CSS0045343	321.095	339.873	397.964	1393.34	1326.42	1308.48	352.977	1342.75	-1.92579	2.07355e-91	6.94959e-90	CSS0045343	Chr7	143661498	143668589	-	1492	protein_coding	- && sp|Q3TP92|CNEP1_MOUSE CTD nuclear envelope phosphatase 1 OS=Mus musculus OX=10090 GN=Ctdnep1 PE=1 SV=2 && PF03031:NLI interacting factor-like phosphatase	NIF
CSS0011097	908.096	919.253	883.403	203.253	168.54	171.14	903.584	180.978	2.31835	2.08821e-91	6.99303e-90	CSS0011097	Chr3	50065324	50066004	-	681	protein_coding	- && - && -	-
CSS0005927	3558.13	3331.44	3268.3	1603.95	1440.69	1481.58	3385.96	1508.74	1.16595	3.7146e-91	1.24194e-89	CSS0005927	Chr8	26614103	26617837	-	966	protein_coding	- && sp|D7U6G6|ANRPN_VITVI Anthocyanidin reductase ((2S)-flavan-3-ol-forming) OS=Vitis vinifera OX=29760 GN=ANR PE=3 SV=1 && PF01370:NAD dependent epimerase/dehydratase family	Epimerase
CSS0001166	1501.12	1453.01	1452.47	4.59847	2.85661	3.91176	1468.87	3.78895	8.5956	4.27117e-91	1.42687e-89	CSS0001166	Chr4	189174562	189176615	-	1676	protein_coding	- && sp|A2WL19|DRE2A_ORYSI Dehydration-responsive element-binding protein 2A OS=Oryza sativa subsp. indica OX=39946 GN=DREB2A PE=3 SV=2 && PF00847:AP2 domain	AP2
CSS0046455	487.663	516.652	507.548	34.9484	36.1838	31.2941	503.954	34.1421	3.88242	4.49823e-91	1.50151e-89	CSS0046455	Chr12	118744840	118746261	-	1422	protein_coding	- && sp|Q940V3|U91A1_ARATH UDP-glycosyltransferase 91A1 OS=Arabidopsis thaliana OX=3702 GN=UGT91A1 PE=2 SV=1 && PF00201:UDP-glucoronosyl and UDP-glucosyl transferase	UDPGT
CSS0042504	613.09	518.933	607.52	48.7438	54.2757	56.7206	579.848	53.2467	3.44734	5.74029e-91	1.91456e-89	CSS0042504	Chr7	48411284	48415494	-	2834	protein_coding	- && sp|O81832|Y4729_ARATH G-type lectin S-receptor-like serine/threonine-protein kinase At4g27290 OS=Arabidopsis thaliana OX=3702 GN=At4g27290 PE=3 SV=4 && -	-
CSS0016201	105.359	79.8358	96.1265	703.567	670.352	706.073	93.7739	693.331	-2.88087	9.37742e-91	3.12513e-89	CSS0016201	Chr3	66419107	66421437	+	870	protein_coding	- && sp|B6ZJZ9|PNC1_SOYBN Peroxisomal adenine nucleotide carrier 1 OS=Glycine max OX=3847 GN=PNC1 PE=2 SV=1 && PF00153:Mitochondrial carrier protein	Mito_carr
CSS0050315	1897.47	1786.04	1865.82	703.567	664.639	707.051	1849.78	691.752	1.41944	9.62807e-91	3.20607e-89	CSS0050315	Contig705	745830	757401	+	3571	protein_coding	- && sp|Q9FG90|DRL33_ARATH Probable disease resistance protein At5g43740 OS=Arabidopsis thaliana OX=3702 GN=At5g43740 PE=2 SV=1 && PF00931:NB-ARC domain	NB-ARC
CSS0048413	1875.39	1829.38	1922.53	625.393	720.819	654.242	1875.77	666.818	1.4927	1.19427e-90	3.97362e-89	CSS0048413	Chr13	109720749	109722198	-	602	protein_coding	- && - && -	-
CSS0013893	309.054	296.533	270.116	1124.79	1184.54	1108.01	291.901	1139.11	-1.96547	1.8758e-90	6.23118e-89	CSS0013893	Chr11	4867485	4869540	-	1327	protein_coding	- && sp|O64747|WRK35_ARATH Probable WRKY transcription factor 35 OS=Arabidopsis thaliana OX=3702 GN=WRKY35 PE=2 SV=1 && PF03106:WRKY DNA -binding domain	WRKY
novel.7334	473.615	538.322	625.784	25.7515	32.375	20.5368	545.907	26.2211	4.37854	1.99803e-90	6.63188e-89	-	Chr8	21835868	21937515	+	3622	-	- && sp|Q8GYA4|CRK10_ARATH Cysteine-rich receptor-like protein kinase 10 OS=Arabidopsis thaliana OX=3702 GN=CRK10 PE=1 SV=3 && PF07714:Protein tyrosine and serine/threonine kinase	Pkinase_Tyr
CSS0045477	713.433	800.639	764.206	2123.58	2236.73	1979.35	759.426	2113.22	-1.4776	2.63138e-90	8.7271e-89	CSS0045477	Chr5	107484890	107495745	-	1891	protein_coding	- && sp|Q9FN30|TAT2_ARATH Probable aminotransferase TAT2 OS=Arabidopsis thaliana OX=3702 GN=At5g53970 PE=2 SV=1 && PF00155:Aminotransferase class I and II	Aminotran_1_2
CSS0000806	8.02737	15.9672	13.4577	548.138	568.466	576.007	12.4841	564.204	-5.51123	3.92259e-90	1.2999e-88	CSS0000806	Chr2	7294863	7296658	+	1796	protein_coding	- && sp|Q9ZVX4|U90A1_ARATH UDP-glycosyltransferase 90A1 OS=Arabidopsis thaliana OX=3702 GN=UGT90A1 PE=2 SV=1 && PF00201:UDP-glucoronosyl and UDP-glucosyl transferase	UDPGT
CSS0036983	1226.18	1246.58	1298.67	366.958	384.691	361.838	1257.14	371.162	1.76018	4.36865e-90	1.44656e-88	CSS0036983	Chr8	139595317	139600920	+	1269	protein_coding	- && sp|Q39224|SRG1_ARATH Protein SRG1 OS=Arabidopsis thaliana OX=3702 GN=SRG1 PE=2 SV=1 && PF14226:non-haem dioxygenase in morphine synthesis N-terminal|PF03171:2OG-Fe(II) oxygenase superfamily	2OG-FeII_Oxy
CSS0009318	868.963	711.679	825.727	2276.25	2212.92	2203.3	802.123	2230.82	-1.47346	5.31582e-90	1.75878e-88	CSS0009318	Chr9	160635474	160637530	-	2057	protein_coding	- && sp|A0A2P1GIW7|SAT_CATRO Stemmadenine O-acetyltransferase OS=Catharanthus roseus OX=4058 GN=SAT PE=1 SV=1 && PF02458:Transferase family	-
novel.7686	147.503	135.721	124.964	939.928	770.334	830.272	136.063	846.845	-2.63882	8.60095e-90	2.84341e-88	-	Chr8	141320868	141322350	-	836	-	- && sp|Q08IT1|DADIS_PANGI Dammarenediol II synthase OS=Panax ginseng OX=4054 GN=DDS PE=1 SV=1 && -	-
CSS0027684	32.1095	30.7938	14.419	537.102	564.657	518.309	25.7741	540.023	-4.40494	1.32441e-89	4.37139e-88	CSS0027684	Chr10	122964827	122967910	-	2103	protein_coding	- && sp|Q9LQN6|P2C04_ARATH Probable protein phosphatase 2C 4 OS=Arabidopsis thaliana OX=3702 GN=PLL5 PE=2 SV=1 && PF00481:Protein phosphatase 2C	PP2C
CSS0011049	1581.39	1544.25	1628.38	513.19	560.849	552.537	1584.68	542.192	1.5481	1.42945e-89	4.71434e-88	CSS0011049	Chr6	39321243	39323343	-	453	protein_coding	- && sp|P85524|KIRO_ACTDE Kirola OS=Actinidia deliciosa OX=3627 PE=1 SV=1 && PF00407:Pathogenesis-related protein Bet v I family	-
novel.2107	2423.26	2569.57	2548.31	1106.39	1110.27	1130.5	2513.72	1115.72	1.17174	2.43032e-89	8.00881e-88	-	Chr13	43921733	43931359	+	9188	-	- && - && -	-
CSS0045946	673.296	769.846	774.78	122.319	99.9815	98.772	739.307	107.024	2.78632	2.52067e-89	8.29992e-88	CSS0045946	Contig1212	90156	98226	-	4365	protein_coding	- && sp|Q9LYS2|AB10C_ARATH ABC transporter C family member 10 OS=Arabidopsis thaliana OX=3702 GN=ABCC10 PE=2 SV=2 && PF00664:ABC transporter transmembrane region|PF00005:ABC transporter	ABC_tran
CSS0027597	38.13	88.9599	52.8696	782.66	697.014	796.044	59.9865	758.573	-3.67795	2.52447e-89	8.30579e-88	CSS0027597	Chr4	188583109	188583877	-	769	protein_coding	- && sp|O80920|PYL4_ARATH Abscisic acid receptor PYL4 OS=Arabidopsis thaliana OX=3702 GN=PYL4 PE=1 SV=1 && PF10604:Polyketide cyclase / dehydrase and lipid transport	-
CSS0050252	68.2327	53.6041	69.2111	594.123	585.606	608.279	63.6826	596.003	-3.21918	2.91336e-89	9.57768e-88	CSS0050252	Chr15	13681827	13682816	-	990	protein_coding	- && sp|Q8LD98|NHL6_ARATH NDR1/HIN1-like protein 6 OS=Arabidopsis thaliana OX=3702 GN=NHL6 PE=1 SV=1 && PF03168:Late embryogenesis abundant protein	-
CSS0045225	42.1437	46.761	34.6055	529.744	541.805	523.198	41.1701	531.582	-3.6987	6.37257e-89	2.09332e-87	CSS0045225	Chr1	20395536	20399601	+	2039	protein_coding	- && sp|Q9SV30|GATA8_ARATH GATA transcription factor 8 OS=Arabidopsis thaliana OX=3702 GN=GATA8 PE=1 SV=1 && PF00320:GATA zinc finger	GATA
CSS0038821	148.506	163.093	152.841	810.251	801.756	798.978	154.814	803.662	-2.37792	6.87709e-89	2.25725e-87	CSS0038821	Chr8	161071050	161072785	+	1194	protein_coding	- && sp|Q9FHE4|BRG1_ARATH BOI-related E3 ubiquitin-protein ligase 1 OS=Arabidopsis thaliana OX=3702 GN=BRG1 PE=1 SV=1 && PF13920:Zinc finger, C3HC4 type (RING finger)	-
CSS0026097	576.967	513.23	513.316	12.8757	34.2794	26.4044	534.504	24.5198	4.45281	7.163e-89	2.34922e-87	CSS0026097	Chr8	21639973	21643320	+	1989	protein_coding	- && sp|O65468|CRK8_ARATH Cysteine-rich receptor-like protein kinase 8 OS=Arabidopsis thaliana OX=3702 GN=CRK8 PE=3 SV=2 && PF07714:Protein tyrosine kinase|PF01657:Salt stress response/antifungal	Pkinase_Tyr
CSS0045085	422.44	409.444	380.661	1323.44	1319.76	1321.2	404.182	1321.47	-1.70989	7.56754e-89	2.47993e-87	CSS0045085	Chr12	111144387	111152455	+	3682	protein_coding	- && sp|Q8RX56|UNC13_ARATH Protein unc-13 homolog OS=Arabidopsis thaliana OX=3702 GN=PATROL1 PE=2 SV=1 && PF05664:Plant family of unknown function (DUF810)	-
CSS0034004	573.957	531.479	545.037	53.3423	46.658	59.6544	550.158	53.2182	3.37109	1.35062e-88	4.42255e-87	CSS0034004	Chr15	87542357	87545742	-	2104	protein_coding	- && sp|Q8LFV3|CDF3_ARATH Cyclic dof factor 3 OS=Arabidopsis thaliana OX=3702 GN=CDF3 PE=1 SV=2 && PF02701:Dof domain, zinc finger	zf-Dof
CSS0036879	625.132	686.588	626.745	92.8892	90.4595	84.1029	646.155	89.1505	2.85607	1.4758e-88	4.82862e-87	CSS0036879	Chr7	48502486	48503253	-	619	protein_coding	- && - && -	-
CSS0048724	674.299	670.621	640.203	96.568	105.695	93.8823	661.708	98.715	2.74447	2.92467e-88	9.56156e-87	CSS0048724	Chr14	98594828	98618134	+	2760	protein_coding	- && sp|Q38998|AKT1_ARATH Potassium channel AKT1 OS=Arabidopsis thaliana OX=3702 GN=AKT1 PE=1 SV=2 && PF00520:Ion transport protein|PF00027:Cyclic nucleotide-binding domain|PF11834:KHA, dimerisation domain of potassium ion channel|PF12796:Ankyrin repeats (3 copies)	Ion_trans
CSS0042770	57.195	76.4143	65.366	621.714	677.018	575.029	66.3251	624.587	-3.24114	3.37351e-88	1.10202e-86	CSS0042770	Chr4	18706931	18708059	-	1129	protein_coding	- && sp|Q9SX78|CXE2_ARATH Probable carboxylesterase 2 OS=Arabidopsis thaliana OX=3702 GN=CXE2 PE=2 SV=1 && PF07859:alpha/beta hydrolase fold	Abhydrolase_3
CSS0043418	440.502	468.75	427.763	1387.82	1390.22	1380.85	445.672	1386.3	-1.63883	4.20926e-88	1.37395e-86	CSS0043418	Chr3	44068564	44071223	+	1008	protein_coding	- && sp|P22738|RL32_ARATH 60S ribosomal protein L3-2 OS=Arabidopsis thaliana OX=3702 GN=ARP2 PE=2 SV=4 && PF00297:Ribosomal protein L3	-
CSS0025032	2029.92	2176.1	2308	772.544	793.187	852.764	2171.34	806.165	1.43001	5.54839e-88	1.80962e-86	CSS0025032	Chr7	160562971	160564694	+	610	protein_coding	- && sp|Q9FLI7|NEET_ARATH CDGSH iron-sulfur domain-containing protein NEET OS=Arabidopsis thaliana OX=3702 GN=NEET PE=1 SV=1 && PF09360:Iron-binding zinc finger CDGSH type	-
CSS0009031	29.0992	17.1077	29.7992	481.92	557.04	516.353	25.3354	518.438	-4.33739	8.92701e-88	2.90698e-86	CSS0009031	Chr13	114444858	114455090	+	2506	protein_coding	- && sp|Q9FME8|OPT4_ARATH Oligopeptide transporter 4 OS=Arabidopsis thaliana OX=3702 GN=OPT4 PE=1 SV=1 && PF03169:OPT oligopeptide transporter protein	OPT
CSS0024950	338.153	331.889	262.425	1283.89	1285.48	1494.29	310.822	1354.55	-2.126	1.04594e-87	3.40329e-86	CSS0024950	Chr1	211176557	211189039	-	1848	protein_coding	- && sp|Q9FKS8|LHT1_ARATH Lysine histidine transporter 1 OS=Arabidopsis thaliana OX=3702 GN=LHT1 PE=1 SV=1 && PF01490:Transmembrane amino acid transporter protein	Aa_trans
CSS0005191	8.02737	18.2482	22.1091	542.62	502.764	534.934	16.1282	526.773	-5.02956	1.1598e-87	3.77082e-86	CSS0005191	Chr14	97178676	97180094	+	1308	protein_coding	- && sp|O48780|KCS11_ARATH 3-ketoacyl-CoA synthase 11 OS=Arabidopsis thaliana OX=3702 GN=KCS11 PE=1 SV=1 && PF08541:3-Oxoacyl-[acyl-carrier-protein (ACP)] synthase III C terminal|PF08392:FAE1/Type III polyketide synthase-like protein	-
CSS0032234	1012.45	923.815	861.294	161.866	200.915	174.073	932.52	178.952	2.38197	1.40885e-87	4.57694e-86	CSS0032234	Chr7	141190756	141209729	+	1623	protein_coding	- && sp|O20252|S17P_SPIOL Sedoheptulose-1,7-bisphosphatase, chloroplastic OS=Spinacia oleracea OX=3562 PE=2 SV=1 && PF00316:Fructose-1-6-bisphosphatase, N-terminal domain	-
CSS0026729	480.639	457.345	456.601	22.0727	21.9007	19.5588	464.862	21.1774	4.455	2.59164e-87	8.41284e-86	CSS0026729	Chr4	189168872	189174511	+	2046	protein_coding	- && sp|Q84K71|DTX44_ARATH Protein DETOXIFICATION 44, chloroplastic OS=Arabidopsis thaliana OX=3702 GN=DTX44 PE=2 SV=1 && PF01554:MatE	MatE
CSS0037708	283.968	246.351	195.137	1194.68	1150.26	1146.15	241.819	1163.7	-2.26874	2.61253e-87	8.47399e-86	CSS0037708	Chr9	117161701	117164295	-	2595	protein_coding	- && sp|O65351|SBT17_ARATH Subtilisin-like protease SBT1.7 OS=Arabidopsis thaliana OX=3702 GN=SBT1.7 PE=1 SV=1 && PF17766:Fibronectin type-III domain|PF05922:Peptidase inhibitor I9|PF00082:Subtilase family|PF02225:PA domain	Peptidase_S8
CSS0029455	1503.13	1723.31	1655.3	538.941	527.521	483.103	1627.25	516.522	1.65454	2.81795e-87	9.13311e-86	CSS0029455	Chr10	104970764	104976789	-	1119	protein_coding	- && - && -	-
CSS0028979	1581.39	1461	1533.22	3182.14	3181.32	3094.21	1525.2	3152.56	-1.04675	3.21757e-87	1.04201e-85	CSS0028979	Chr13	66872563	66880300	-	2284	protein_coding	- && sp|Q9FJH6|AB1F_ARATH ABC transporter F family member 1 OS=Arabidopsis thaliana OX=3702 GN=ABCF1 PE=2 SV=1 && PF00005:ABC transporter|PF12848:ABC transporter	ABC_tran
CSS0013904	9.03079	17.1077	15.3802	550.897	493.242	548.625	13.8396	530.921	-5.27175	4.23807e-87	1.37143e-85	CSS0013904	Chr4	2868424	2872455	-	2261	protein_coding	- && sp|A0A0A1C3I2|HMGR1_PANGI 3-hydroxy-3-methylglutaryl coenzyme A reductase 1 OS=Panax ginseng OX=4054 GN=HMGR1 PE=2 SV=1 && PF00368:Hydroxymethylglutaryl-coenzyme A reductase	-
CSS0011544	806.751	788.094	887.248	2264.29	2070.09	2166.14	827.364	2166.84	-1.38771	4.9878e-87	1.61278e-85	CSS0011544	Chr8	95549626	95558798	+	2067	protein_coding	- && sp|Q9C757|INT2_ARATH Probable inositol transporter 2 OS=Arabidopsis thaliana OX=3702 GN=INT2 PE=1 SV=1 && PF00083:Sugar (and other) transporter	Sugar_tr
CSS0001889	1034.53	922.674	952.614	224.406	220.912	233.728	969.939	226.348	2.10003	6.28635e-87	2.03106e-85	CSS0001889	Chr5	109020611	109028465	-	1299	protein_coding	- && sp|Q9SIV3|GLK1_ARATH Transcription activator GLK1 OS=Arabidopsis thaliana OX=3702 GN=GLK1 PE=1 SV=2 && PF00249:Myb-like DNA-binding domain	Myb_DNA-binding
CSS0014105	194.664	290.831	210.517	1178.13	1158.83	1198.96	232.004	1178.64	-2.35144	7.48083e-87	2.4151e-85	CSS0014105	Chr10	13163422	13178618	-	2009	protein_coding	- && sp|Q38956|DTX29_ARATH Protein DETOXIFICATION 29 OS=Arabidopsis thaliana OX=3702 GN=DTX29 PE=1 SV=1 && PF01554:MatE	MatE
CSS0022711	256.876	232.664	236.471	956.483	1036	1024.88	242.004	1005.79	-2.0542	9.35952e-87	3.01925e-85	CSS0022711	Chr6	10027535	10035698	-	2842	protein_coding	- && sp|Q93ZS4|NIK3_ARATH Protein NSP-INTERACTING KINASE 3 OS=Arabidopsis thaliana OX=3702 GN=NIK3 PE=1 SV=1 && PF00069:Protein kinase domain|PF08263:Leucine rich repeat N-terminal domain	Pkinase
CSS0018870	47.1608	44.48	54.7921	543.54	578.941	517.331	48.811	546.604	-3.48008	1.1818e-86	3.80935e-85	CSS0018870	Contig676	164962	169028	+	2665	protein_coding	- && sp|P45726|PALY_CAMSI Phenylalanine ammonia-lyase OS=Camellia sinensis OX=4442 GN=PAL PE=2 SV=1 && PF00221:Aromatic amino acid lyase	-
CSS0035800	33.1129	21.6697	40.3731	534.343	595.128	494.838	31.7186	541.436	-4.07616	1.40088e-86	4.51199e-85	CSS0035800	Chr13	67651775	67654765	-	936	protein_coding	- && sp|Q9FFB6|ZFP34_ARATH E3 ubiquitin-protein ligase RZFP34 OS=Arabidopsis thaliana OX=3702 GN=RZPF34 PE=1 SV=1 && PF13445:RING-type zinc-finger|PF14599:Zinc-ribbon|PF05495:CHY zinc finger	zf-CHY
CSS0026112	51.1745	35.3559	31.7218	590.444	547.518	510.485	39.4174	549.482	-3.79997	3.12729e-86	1.00646e-84	CSS0026112	Chr4	40115896	40117849	-	1230	protein_coding	- && sp|Q96520|PER12_ARATH Peroxidase 12 OS=Arabidopsis thaliana OX=3702 GN=PER12 PE=1 SV=1 && PF00141:Peroxidase	-
CSS0001428	1160.96	1181.57	1127.56	312.696	329.463	270.89	1156.7	304.35	1.9252	3.54373e-86	1.1396e-84	CSS0001428	Chr10	5622189	5624436	-	1524	protein_coding	- && sp|Q9FZK1|FBX6_ARATH F-box only protein 6 OS=Arabidopsis thaliana OX=3702 GN=FBX6 PE=2 SV=1 && -	-
novel.6821	1010.45	1011.63	1044.9	220.727	262.809	260.132	1022.32	247.889	2.04529	4.25579e-86	1.36664e-84	-	Chr7	73087821	73091392	+	1188	-	- && - && -	-
CSS0001506	517.765	466.469	459.485	28.5105	21.9007	15.6471	481.24	22.0194	4.44357	4.25638e-86	1.36664e-84	CSS0001506	Chr4	9214087	9215951	+	1224	protein_coding	- && - && -	-
CSS0032187	342.167	343.294	333.559	1259.06	1276.91	1131.48	339.673	1222.48	-1.84823	4.95827e-86	1.59077e-84	CSS0032187	Chr15	79234251	79240106	+	1083	protein_coding	- && sp|Q9ZQ31|STY13_ARATH Serine/threonine-protein kinase STY13 OS=Arabidopsis thaliana OX=3702 GN=STY13 PE=1 SV=2 && PF07714:Protein tyrosine kinase	Pkinase_Tyr
CSS0009983	247.845	302.236	287.418	1201.12	1098.84	1097.25	279.166	1132.41	-2.02223	5.28546e-86	1.69442e-84	CSS0009983	Chr11	84039665	84042665	+	708	protein_coding	- && sp|P49098|CYB5_TOBAC Cytochrome b5 OS=Nicotiana tabacum OX=4097 PE=2 SV=1 && PF00173:Cytochrome b5-like Heme/Steroid binding domain	-
CSS0001480	866.956	781.251	841.107	163.706	138.07	169.184	829.771	156.986	2.40279	5.71385e-86	1.83034e-84	CSS0001480	Chr2	85303777	85333366	-	1005	protein_coding	- && sp|A0A078ISJ6|TC32B_BRANA Short-chain dehydrogenase TIC 32 B, chloroplastic OS=Brassica napus OX=3708 GN=TIC32B PE=3 SV=1 && PF00106:short chain dehydrogenase	adh_short
CSS0028587	29.0992	26.2318	44.2182	493.876	529.426	563.294	33.1831	528.865	-3.98047	8.57986e-86	2.74629e-84	CSS0028587	Chr11	43649807	43658357	+	4305	protein_coding	- && sp|Q2PCF1|PDR2_NICPL Pleiotropic drug resistance protein 2 OS=Nicotiana plumbaginifolia OX=4092 GN=PDR2 PE=2 SV=1 && PF01061:ABC-2 type transporter|PF00005:ABC transporter|PF14510:ABC-transporter N-terminal|PF08370:Plant PDR ABC transporter associated	ABC2_membrane
CSS0017546	1281.37	1259.13	1212.16	2764.6	2672.84	2649.24	1250.88	2695.56	-1.10809	9.27998e-86	2.96808e-84	CSS0017546	Chr6	29717625	29720842	+	1766	protein_coding	- && sp|Q8RWD0|COL16_ARATH Zinc finger protein CONSTANS-LIKE 16 OS=Arabidopsis thaliana OX=3702 GN=COL16 PE=1 SV=2 && PF00643:B-box zinc finger|PF06203:CCT motif	CCT
CSS0015299	508.735	565.694	468.136	1660.05	1582.56	1814.08	514.188	1685.56	-1.71532	1.06422e-85	3.40115e-84	CSS0015299	Chr9	57228754	57235593	-	1873	protein_coding	- && sp|O82656|PTP1_ARATH Protein-tyrosine-phosphatase PTP1 OS=Arabidopsis thaliana OX=3702 GN=PTP1 PE=1 SV=1 && PF00102:Protein-tyrosine phosphatase	Y_phosphatase
CSS0044301	9.03079	2.28102	11.5352	602.4	743.672	797.022	7.61567	714.365	-6.5039	1.22365e-85	3.90763e-84	CSS0044301	Chr15	6150309	6153453	-	1280	protein_coding	- && sp|Q9LJP1|GRIP4_ARATH GDSL esterase/lipase 4 OS=Arabidopsis thaliana OX=3702 GN=GLIP4 PE=2 SV=2 && PF00657:GDSL-like Lipase/Acylhydrolase	Lipase_GDSL
CSS0033448	44.1505	63.8687	69.2111	633.67	586.558	576.007	59.0768	598.745	-3.34229	1.28609e-85	4.10386e-84	CSS0033448	Chr12	32610390	32614147	-	1158	protein_coding	- && sp|Q9LQU4|PCR2_ARATH Protein PLANT CADMIUM RESISTANCE 2 OS=Arabidopsis thaliana OX=3702 GN=PCR2 PE=1 SV=1 && PF04749:PLAC8 family	-
CSS0048185	28.0958	22.8102	29.7992	473.643	483.72	491.904	26.9018	483.089	-4.15781	1.36321e-85	4.34658e-84	CSS0048185	Chr5	11932481	11933633	+	1153	protein_coding	- && sp|Q9XGY6|WAXS1_SIMCH Long-chain-alcohol O-fatty-acyltransferase OS=Simmondsia chinensis OX=3999 PE=1 SV=1 && PF13813:Membrane bound O-acyl transferase family	-
CSS0016868	63.2155	49.042	46.1407	533.423	581.797	561.338	52.7994	558.853	-3.40268	1.3753e-85	4.38174e-84	CSS0016868	Chr11	5774914	5779663	-	2772	protein_coding	- && sp|F4HXL0|PLIP2_ARATH Phospholipase A1 PLIP2, chloroplastic OS=Arabidopsis thaliana OX=3702 GN=PLIP2 PE=1 SV=1 && PF01764:Lipase (class 3)	Lipase_3
CSS0030825	941.209	919.253	906.473	213.369	216.15	230.794	922.312	220.105	2.06755	1.38562e-85	4.41124e-84	CSS0030825	Chr14	90565474	90567178	+	1705	protein_coding	- && sp|Q9SRQ1|C89A9_ARATH Cytochrome P450 89A9 OS=Arabidopsis thaliana OX=3702 GN=CYP89A9 PE=2 SV=1 && PF00067:Cytochrome P450	p450
CSS0037274	253.866	242.929	211.478	972.118	1004.58	1022.93	236.091	999.873	-2.08403	1.8403e-85	5.85423e-84	CSS0037274	Contig279	112349	120365	-	2782	protein_coding	- && sp|F4K0E8|ISPG_ARATH 4-hydroxy-3-methylbut-2-en-1-yl diphosphate synthase (ferredoxin), chloroplastic OS=Arabidopsis thaliana OX=3702 GN=ISPG PE=1 SV=1 && PF04551:GcpE protein	-
CSS0026991	172.588	156.25	169.183	827.725	793.187	831.25	166.007	817.387	-2.29777	1.96366e-85	6.24185e-84	CSS0026991	Chr11	3407237	3412693	+	1693	protein_coding	- && sp|P43288|KSG1_ARATH Shaggy-related protein kinase alpha OS=Arabidopsis thaliana OX=3702 GN=ASK1 PE=1 SV=3 && PF00069:Protein kinase domain	Pkinase
CSS0012363	349.191	370.666	395.08	1439.32	1355.94	1232.21	371.646	1342.49	-1.85267	2.11662e-85	6.72286e-84	CSS0012363	Chr1	170859649	170862961	-	1119	protein_coding	- && sp|U3KRF2|DHQS_ACTCC 3-dehydroquinate synthase, chloroplastic OS=Actinidia chinensis var. chinensis OX=1590841 GN=DHQS PE=1 SV=3 && PF01761:3-dehydroquinate synthase	-
CSS0017198	92.3148	79.8358	93.2427	640.108	611.315	672.823	88.4644	641.416	-2.85396	4.94017e-85	1.56791e-83	CSS0017198	Chr7	125473042	125478859	-	2879	protein_coding	- && sp|Q9LTA6|WAV3_ARATH E3 ubiquitin-protein ligase WAV3 OS=Arabidopsis thaliana OX=3702 GN=WAV3 PE=1 SV=1 && PF00092:von Willebrand factor type A domain|PF14624:VWA / Hh protein intein-like|PF17123:RING-like zinc finger	VWA
CSS0034429	599.043	661.497	669.041	85.5316	72.3676	96.8162	643.193	84.9051	2.92208	5.80169e-85	1.83992e-83	CSS0034429	Chr1	33870019	33870486	-	468	protein_coding	- && sp|P19037|HS181_ARATH 18.1 kDa class I heat shock protein OS=Arabidopsis thaliana OX=3702 GN=HSP18.1 PE=1 SV=1 && PF00011:Hsp20/alpha crystallin family	-
CSS0014491	2876.81	3048.59	3028.95	1308.73	1449.26	1343.69	2984.78	1367.22	1.12634	6.19217e-85	1.96225e-83	CSS0014491	Chr4	133918609	133924442	-	1877	protein_coding	- && sp|Q6DBH0|APD2_ARATH E3 ubiquitin-protein ligase APD2 OS=Arabidopsis thaliana OX=3702 GN=APD2 PE=1 SV=1 && PF16040:Domain of unknown function (DUF4792)|PF13920:Zinc finger, C3HC4 type (RING finger)|PF16041:Domain of unknown function (DUF4793)	-
CSS0017555	19.065	17.1077	16.3415	499.394	458.011	486.037	17.5047	481.147	-4.78077	1.38783e-84	4.39117e-83	CSS0017555	Chr4	188476608	188480515	-	801	protein_coding	- && sp|Q948P6|FRI3_SOYBN Ferritin-3, chloroplastic OS=Glycine max OX=3847 PE=2 SV=1 && PF00210:Ferritin-like domain	Ferritin
CSS0020310	228.78	228.102	212.44	904.06	1019.81	966.206	223.107	963.359	-2.11124	1.6218e-84	5.12756e-83	CSS0020310	Contig631	98045	99473	+	802	protein_coding	- && sp|Q9FY93|NAC83_ARATH NAC domain-containing protein 83 OS=Arabidopsis thaliana OX=3702 GN=NAC083 PE=1 SV=1 && PF02365:No apical meristem (NAM) protein	NAM
CSS0023978	69.2361	70.7117	70.1724	686.092	568.466	585.787	70.0401	613.448	-3.13134	2.16174e-84	6.8294e-83	CSS0023978	Chr11	68948898	68955944	+	1479	protein_coding	- && sp|Q84L09|GONS2_ARATH GDP-mannose transporter GONST2 OS=Arabidopsis thaliana OX=3702 GN=GONST2 PE=2 SV=1 && PF03151:Triose-phosphate Transporter family	-
CSS0011182	781.665	776.689	907.434	137.035	161.875	130.066	821.929	142.992	2.52361	3.56663e-84	1.12591e-82	CSS0011182	Chr15	95257311	95261883	+	3269	protein_coding	- && sp|P42730|CLPB1_ARATH Chaperone protein ClpB1 OS=Arabidopsis thaliana OX=3702 GN=CLPB1 PE=1 SV=2 && PF00004:ATPase family associated with various cellular activities (AAA)|PF17871:AAA lid domain|PF02861:Clp amino terminal domain, pathogenicity island component|PF10431:C-terminal, D2-small domain, of ClpB protein|PF07724:AAA domain (Cdc48 subfamily)	AAA
CSS0029292	743.535	735.63	760.361	141.633	149.496	126.154	746.509	139.095	2.42357	4.22933e-84	1.33308e-82	CSS0029292	Chr4	10787067	10790365	+	2172	protein_coding	- && sp|F4HQX1|JAL3_ARATH Jacalin-related lectin 3 OS=Arabidopsis thaliana OX=3702 GN=JAL3 PE=2 SV=1 && PF01419:Jacalin-like lectin domain	-
CSS0016265	1703.81	1478.1	1563.98	539.861	507.525	496.794	1581.96	514.727	1.62	4.46725e-84	1.407e-82	CSS0016265	Contig1039	601970	603481	+	643	protein_coding	- && sp|Q9SUI5|PSAK_ARATH Photosystem I reaction center subunit psaK, chloroplastic OS=Arabidopsis thaliana OX=3702 GN=PSAK PE=2 SV=2 && PF01241:Photosystem I psaG / psaK	-
CSS0027898	926.158	889.599	837.262	176.581	207.581	182.875	884.34	189.012	2.2262	6.61636e-84	2.08229e-82	CSS0027898	Chr4	47338441	47342700	-	546	protein_coding	- && sp|O49292|PPD4_ARATH PsbP domain-containing protein 4, chloroplastic OS=Arabidopsis thaliana OX=3702 GN=PPD4 PE=1 SV=2 && -	-
CSS0040064	202.691	185.903	153.802	870.951	917.925	904.595	180.799	897.824	-2.31415	7.37582e-84	2.31953e-82	CSS0040064	Chr13	56677511	56682995	-	1298	protein_coding	- && sp|Q9FG13|CXE15_ARATH Probable carboxylesterase 15 OS=Arabidopsis thaliana OX=3702 GN=CXE15 PE=2 SV=1 && PF07859:alpha/beta hydrolase fold	Abhydrolase_3
CSS0034000	923.148	822.309	876.674	2233.02	2125.32	2114.31	874.044	2157.55	-1.30252	8.16034e-84	2.56235e-82	CSS0034000	Chr7	12365281	12366000	-	720	protein_coding	- && sp|P56331|IF1A_ONOVI Eukaryotic translation initiation factor 1A OS=Onobrychis viciifolia OX=3882 PE=2 SV=2 && PF01176:Translation initiation factor 1A / IF-1	-
CSS0043953	13.0445	2.28102	3.84506	781.741	683.683	830.272	6.39019	765.232	-6.87624	8.29125e-84	2.60147e-82	CSS0043953	Contig809	255416	259179	-	1228	protein_coding	- && sp|A0A0B6VQ48|PAR1_ROSHC Phenylacetaldehyde reductase OS=Rosa hybrid cultivar OX=128735 GN=PAR PE=1 SV=1 && PF01370:NAD dependent epimerase/dehydratase family	Epimerase
novel.1272	177.606	196.168	259.542	1168.93	1137.88	1026.84	211.105	1111.22	-2.39288	9.2238e-84	2.89187e-82	-	Chr11	64012645	64017400	+	3877	-	- && - && PF01529:DHHC palmitoyltransferase	-
CSS0027424	497.697	439.097	446.027	23.9121	15.2353	22.4926	460.94	20.5467	4.48674	9.5363e-84	2.98758e-82	CSS0027424	Contig275	67333	76424	-	1989	protein_coding	- && sp|O65468|CRK8_ARATH Cysteine-rich receptor-like protein kinase 8 OS=Arabidopsis thaliana OX=3702 GN=CRK8 PE=3 SV=2 && PF01657:Salt stress response/antifungal|PF07714:Protein tyrosine kinase	Pkinase_Tyr
CSS0029577	34.1163	26.2318	37.4893	503.073	484.672	477.235	32.6125	488.327	-3.89375	1.11571e-83	3.49269e-82	CSS0029577	Chr9	147888951	147894571	-	2129	protein_coding	- && sp|Q8LCP6|GUN10_ARATH Endoglucanase 10 OS=Arabidopsis thaliana OX=3702 GN=At1g75680 PE=2 SV=2 && PF00759:Glycosyl hydrolase family 9	-
CSS0044440	165.565	200.73	178.795	890.265	836.988	864.5	181.697	863.918	-2.25265	1.18815e-83	3.71666e-82	CSS0044440	Chr6	175669152	175673166	+	1632	protein_coding	- && sp|Q9SZP8|IF4B3_ARATH Eukaryotic translation initiation factor 4B3 OS=Arabidopsis thaliana OX=3702 GN=EIF4B3 PE=1 SV=1 && PF06273:Plant specific eukaryotic initiation factor 4B	-
CSS0020982	128.438	66.1497	100.933	792.777	796.995	839.073	98.5068	809.615	-3.02917	1.22313e-83	3.8232e-82	CSS0020982	Chr11	55964566	55965526	-	961	protein_coding	- && - && PF04520:Senescence regulator	-
CSS0013753	11.0376	4.56205	15.3802	531.584	589.415	529.066	10.3266	550.022	-5.69681	1.35318e-83	4.2265e-82	CSS0013753	Chr7	98068749	98069697	-	489	protein_coding	- && sp|Q93Y92|HBL2_GOSHI Non-symbiotic hemoglobin 2 OS=Gossypium hirsutum OX=3635 GN=HB2 PE=3 SV=1 && PF00042:Globin	-
[truncated: 9,254 more rows]

## Sheet: Table S2
Table S2. Differentially expressed genes identified in the tea-resistant cultivar inoculated with Pestealotia theae at 24 hours post-inoculation.
[truncated: 17,864 more rows]

## Sheet: Table S3
Table S3. Differentially expressed genes identified in the tea-resistant cultivar inoculated with Pestealotia theae at 72 hours post-inoculation.
[truncated: 15,179 more rows]

[truncated: 6 more sheets: Table S4, Table S5, Table S6, Table S7, Table S8, Table S9]
