# Supplementary material for: Comparative Transcript Profiling of Resistant and Susceptible Tea Plants in Response to Gray Blight Disease
Source: MDPI journal article supplement (doi:10.3390/agronomy14030565), 2024-03-11
Supplement: s1 [file s1 › Supporting information-Figures.pdf]

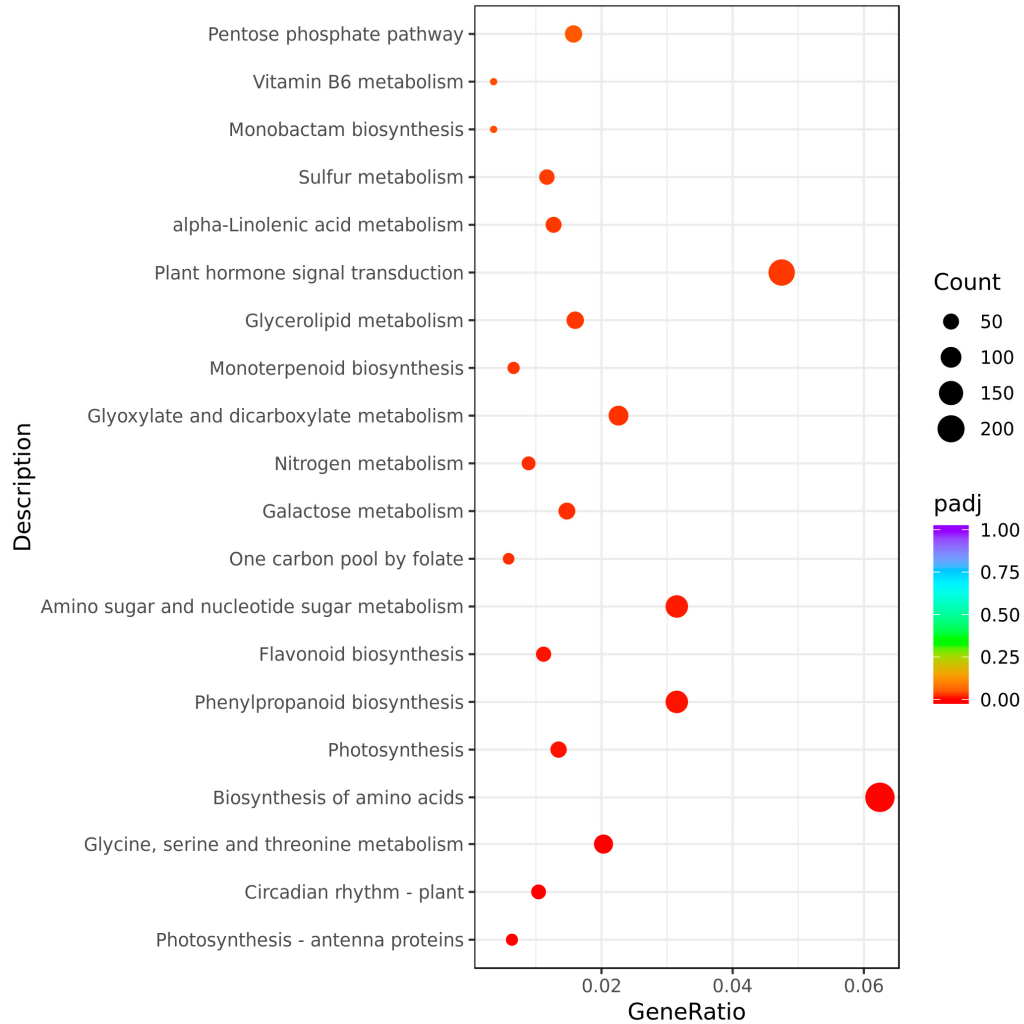

**Figure S1.** Kyoto Encyclopedia of Genes and Genomes (KEGG) enrichment analysis of all differentially expressed genes (DEGs) in the tea-resistant cultivar inoculated with *Pestalotia theae* at 8 hours post-inoculation (hpi). The size of each point corresponds to the number of genes, while the color of the points represents the p.adjust (padj).
